# Supplementary material
Source: PubMed Central journal article supplement (PMC10530498)
Supplement: NIHMS1925801-supplement-Supporting_Info.pdf [file NIHMS1925801-supplement-Supporting_Info.pdf]

# Supporting Information

## Chiral-at-Ruthenium-SEGPHOS Catalysts Display Diastereomer-Dependent Regioselectivity: Enantioselective Isoprene-Mediated Carbonyl *tert*-Prenylation via Halide Counterion Effects

Jonathan Z. Shezaf,<sup>†,§</sup> Catherine G. Santana,<sup>†,§</sup> Connor Saldares,<sup>†</sup> Edward S. Briceno,<sup>†</sup> Ken Sakata<sup>\*\*‡</sup> and Michael J. Krische<sup>\*†</sup>

<sup>†</sup>University of Texas at Austin, Department of Chemistry, Austin, TX 78712, USA

<sup>‡</sup>Faculty of Pharmaceutical Sciences, Toho University, Funabashi, Chiba 274-8510, Japan

### Table of Contents:

|                                                                            |      |
|----------------------------------------------------------------------------|------|
| General Information                                                        | S2   |
| Spectroscopy, Spectrometry and Data Collection                             | S2   |
| Known Alcohols <b>2a-2m</b>                                                | S3   |
| Preparation of Alcohol <b>2l</b>                                           | S4   |
| Products <b>3a-3m</b>                                                      | S7   |
| Product <b>4a</b> and <i>sec-3a</i>                                        | S65  |
| Deuterium Labeling Study for <i>deuterio-3a</i> and <i>deuterio-sec-3a</i> | S73  |
| Preparation of <b>Ruthenium-Chloride Complex</b>                           | S79  |
| Preparation of <b>Ruthenium-Iodide Complex</b>                             | S82  |
| Single Crystal Diffraction Data for <b>3e</b>                              | S85  |
| Single Crystal Diffraction Data for <b>Ruthenium-Chloride Complex</b>      | S88  |
| Single Crystal Diffraction Data for <b>Ruthenium-Iodide Complex</b>        | S91  |
| DFT Calculations                                                           | S94  |
| References                                                                 | S175 |

## **General Information:**

All reactions were run under an atmosphere of argon, unless otherwise indicated. Resealable pressure tubes (13x100 mm) were purchased from Fischer Scientific (catalog number 14-959-35C) and were flame dried followed by cooling in a desiccator or under a stream of argon prior to use. All commercial reagents  $\text{RuHCl}(\text{CO})(\text{PPh}_3)_3$ , (*R*)-SEGPHOS, (*S*)-SEGPHOS, *rac*-BINAP, and anhydrous solvents were used as received from vendors (Strem Chemicals, Fischer Scientific, Sigma Aldrich, and Combi-Blocks) without further purification. Purification of reaction products was carried out by flash column chromatography using 40-63  $\mu\text{m}$  silica gel. Analytical thin-layer chromatography (TLC) was carried out using 0.25 mm commercial silica gel plates (Dynamic Absorbents F254).

## **Spectroscopy, Spectrometry, and Data Collection:**

Infrared spectra were recorded on a Perkin-Elmer 1600 spectrometer. High-resolution mass spectra (HRMS) were isolated on a Karatos MS9 and are reported as  $m/z$  (relative intensity). Accurate masses are reported for the molecular ion ( $M^+$ ,  $M+H$ ,  $M+Na$ ), or a suitable fragment ion. Proton nuclear magnetic resonance ( $^1\text{H}$  NMR) spectra were recorded with a Varian INOVA (400, 500 MHz) spectrometer equipped with a Bruker AVANCE III cryoprobe. Data reported as multiplicity (s = singlet, d = doublet, t = triplet, q = quartet, m = multiplet). Integration and coupling constants were reported in Hertz (Hz). Carbon-13 nuclear magnetic resonance ( $^{13}\text{C}$  NMR) spectra were recorded with a Varian INOVA (100, 125 MHz) spectrometer and were routinely run with broadband decoupling. Fluorine-19 nuclear magnetic resonance ( $^{19}\text{F}$  NMR) spectra were recorded with a Varian INOVA (390, 470 MHz) spectrometer. Decoupled Proton Phosphorus-31 nuclear magnetic resonance ( $^{31}\text{P}\{^1\text{H}\}$  NMR) spectra were recorded with a Varian INOVA (202 MHz) spectrometer. Solid State Phosphorus-31 nuclear magnetic resonance ( $^{31}\text{P}$  NMR) spectra were recorded with a Bruker Avance III 500 HD (162 MHz). Deuterium nuclear magnetic resonance ( $^2\text{H}$  NMR) spectra were recorded in  $\text{CHCl}_3$  and  $\text{C}_6\text{H}_6$  solutions with a Varian Gemini 500 (92 MHz) spectrometer (relaxation delay 2.00s).

## Known Alcohols:

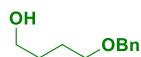

3a  
commercial

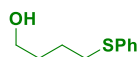

3b  
Ref. 1

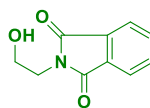

3c  
commercial

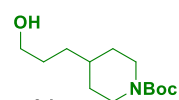

3d  
commercial

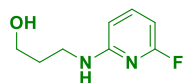

3e  
Ref. 2

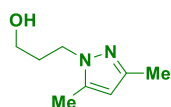

3f  
Ref. 3

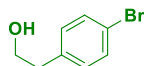

3g  
commercial

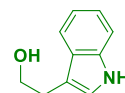

3h  
commercial

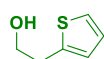

3i  
commercial

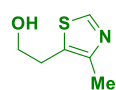

3j  
commercial

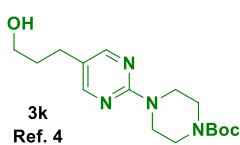

3k  
Ref. 4

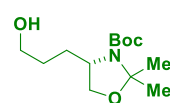

3m  
Ref. 5

## Alcohol 2I

### General Procedure

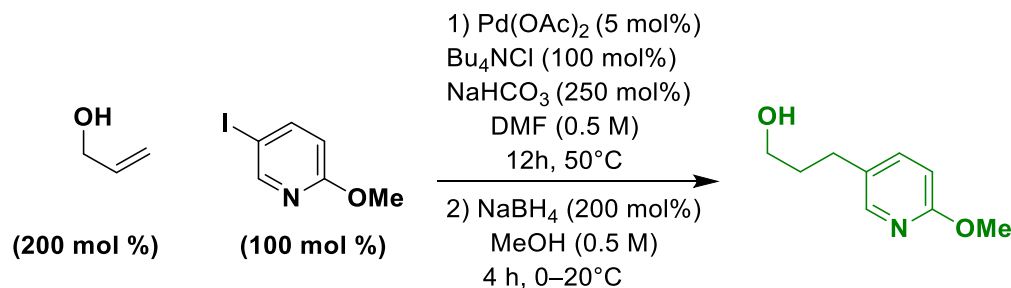

To a flame dried 25 mL round bottom flask equipped with a magnetic stir-bar was added Pd(OAc)<sub>2</sub> (22.5 mg, 0.1 mmol), Bu<sub>4</sub>NCl (555.0 mg, 2.0 mmol), NaHCO<sub>3</sub> (420.0 mg, 5.0 mmol), and DMF (4 mL) under an atmosphere of argon. The solution was sparged with argon and placed in an oil bath at 50 °C. 5-Iodo-2-methoxypyridine (500.0 mg, 2.0 mmol) and allyl alcohol (232.0 mg, 4.0 mmol) were added via syringe. The reaction was allowed to stir for 12 hours. The reaction vessel was removed from the oil bath and the reaction mixture was allowed to reach ambient temperature. Saturated NH<sub>4</sub>Cl (aq) was added and the reaction mixture was transferred to a separatory funnel. The organic layer was collected, and the aqueous layer was extracted with ether (3 x 8 mL). The combined organic extracts were washed with water, dried (Na<sub>2</sub>SO<sub>4</sub>) and concentrated *in vacuo*. The crude residue was transferred to a 10 mL round bottom flask equipped with a magnetic stir bar. Methanol (4 mL) was added and the reaction vessel was placed in an ice water bath. Solid NaBH<sub>4</sub> (151.0 mg, 2.0 mmol) was slowly added. The reaction was allowed to stir for 30 minutes. The reaction vessel was removed from the ice bath and the reaction mixture was allowed to stir for 4 hours. Water was added and the reaction mixture was transferred to a separatory funnel. The organic layer was collected and the aqueous layer was extracted with ethyl acetate (3 x 5 mL). The combined organic extracts were washed with water, dried (Na<sub>2</sub>SO<sub>4</sub>), filtered and concentrated *in vacuo*. The residue was subjected to flash column chromatography (SiO<sub>2</sub>: 15:85 EtOAc:hexanes) to furnish the title compound as a clear oil in 81% yield (270.8 mg, 1.6 mmol).

**TLC (SiO<sub>2</sub>):** R<sub>f</sub> = 0.13 (1:1 EtOAc:hexanes).

**<sup>1</sup>H NMR** (400 MHz, CDCl<sub>3</sub>): δ 7.98 (d, J = 2.5 Hz, 1H), 7.42 (dd, J = 8.5, 2.6 Hz, 1H), 6.68 (d, J = 8.4 Hz, 1H), 3.90 (s, 3H), 3.67 (t, J = 6.3 Hz, 2H), 2.63 (t, J = 7.7 Hz, 2H), 1.89 – 1.79 (m, 2H).

**<sup>13</sup>C NMR** (126 MHz, CDCl<sub>3</sub>): δ 162.9, 146.1, 139.1, 129.8, 110.6, 62.0, 53.5, 34.2, 28.3.

**HRMS** (H<sup>+</sup>, *m/z*) for C<sub>13</sub>H<sub>19</sub>NO<sub>2</sub>: calcd. = 168.1019; found = 168.1020.

**FTIR** (neat): 3054, 2957, 1661, 1572, 1510, 1307, 1113, 899, 778 cm<sup>-1</sup>.

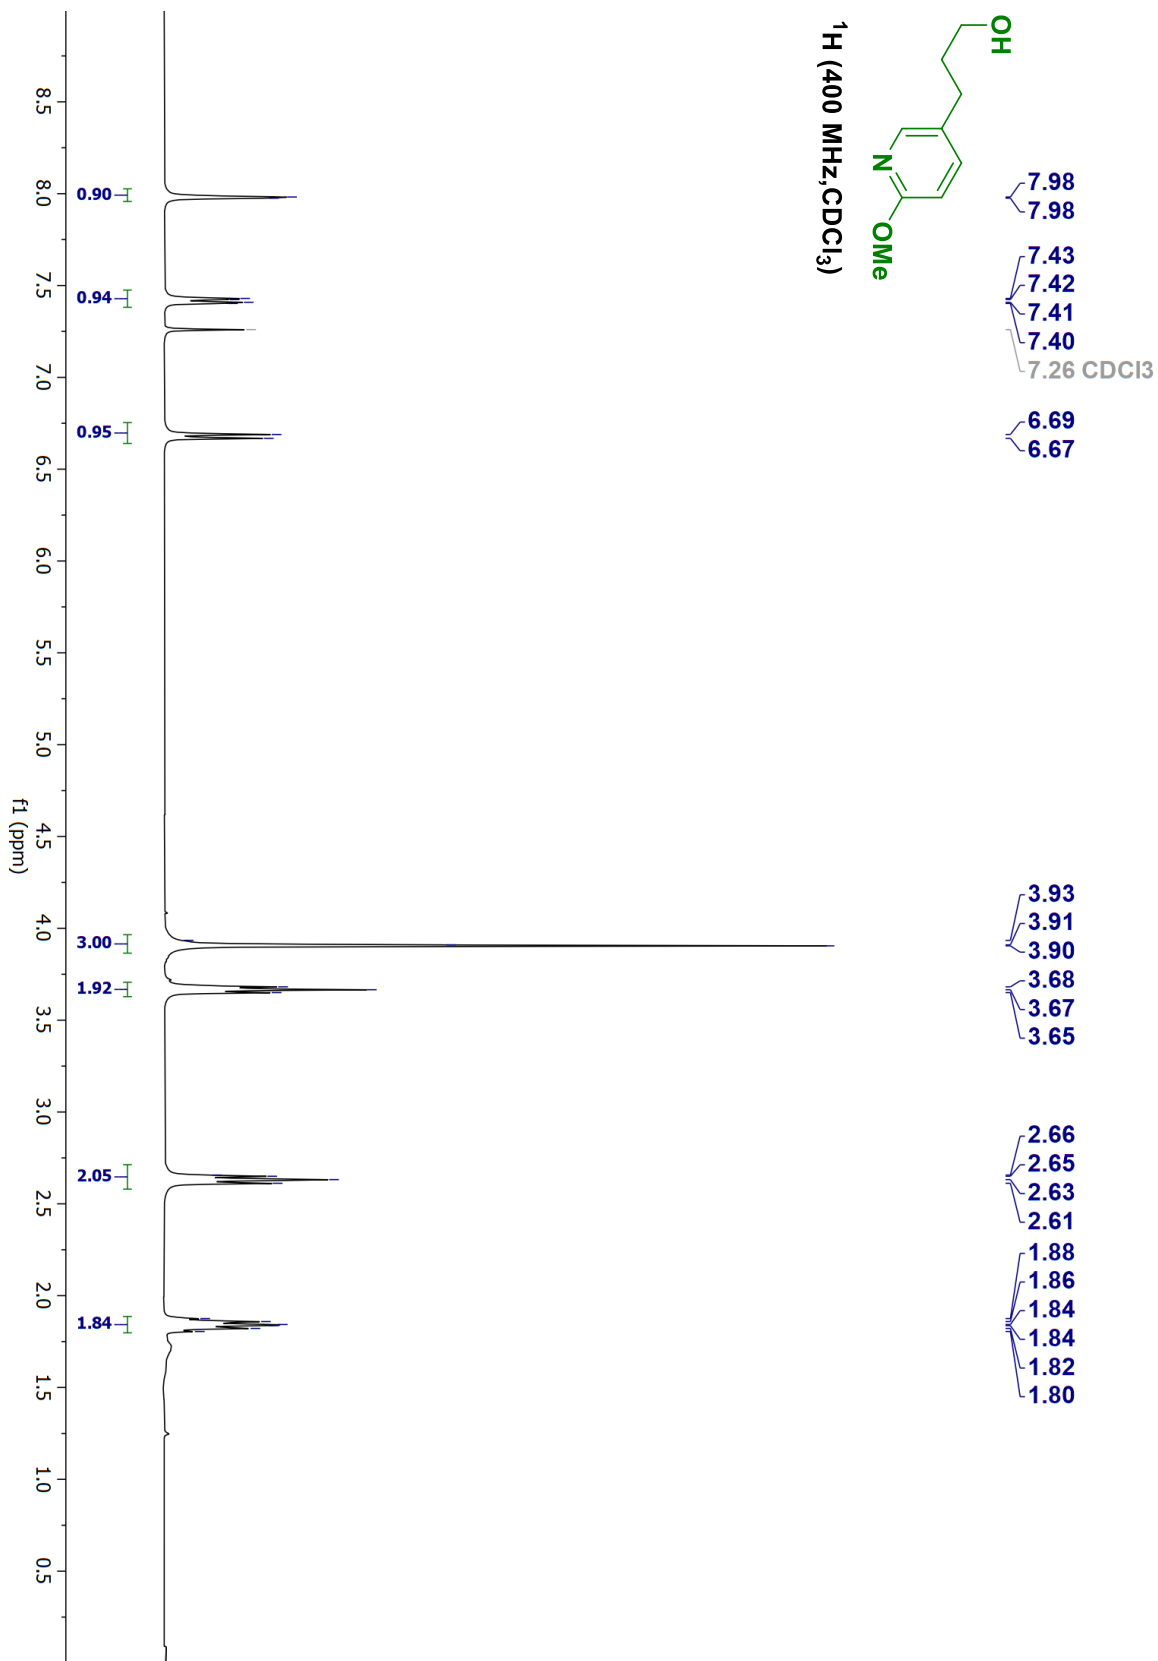

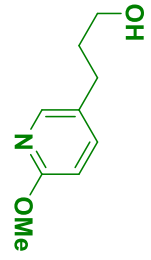

$^{13}\text{C}$  (126 MHz,  $\text{CDCl}_3$ )

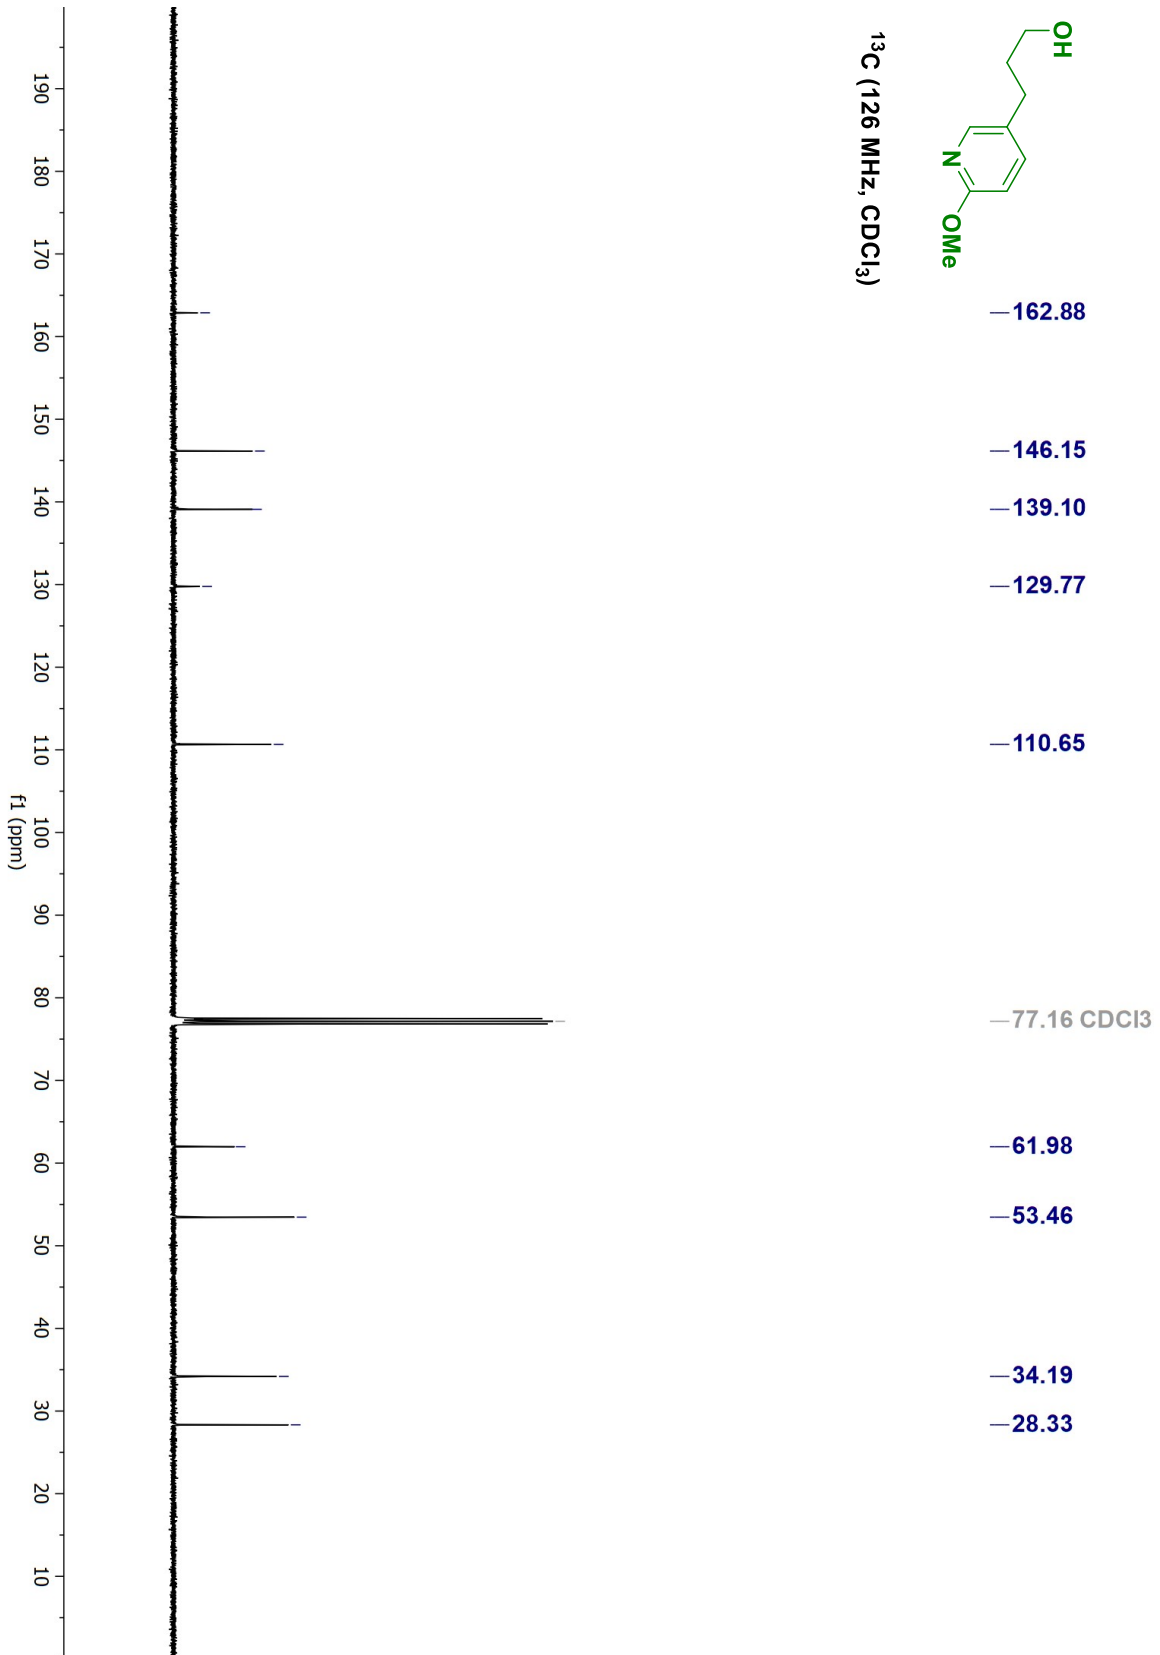

## Products 3a-3m

### General Procedure

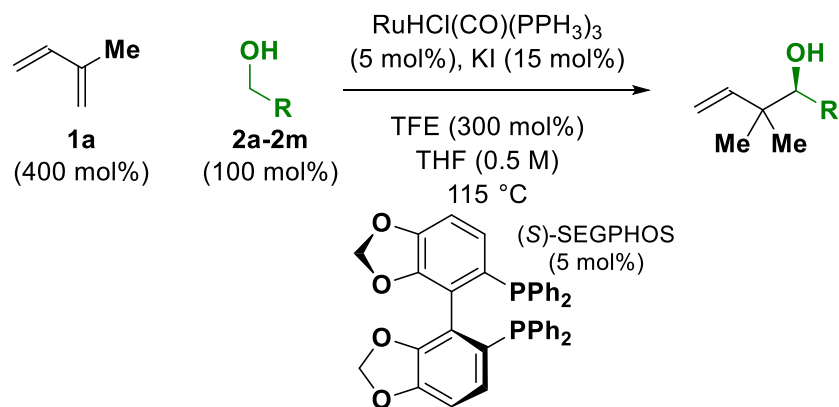

To an oven-dried pressure tube equipped with a magnetic stir bar under an argon atmosphere charged with alcohol **2a-2m** (0.2 mmol, 100 mol%),  $\text{RuHCl(CO)(PPh}_3)_3$  (9.5 mg, 0.01 mmol, 5 mol%), (S)-SEGPHOS (6.1 mg, 0.01 mmol, 5 mol%), KI (5.0 mg, 0.03 mmol, 15 mol%) and trifluoroethanol (43  $\mu\text{L}$ , 0.6 mmol, 300 mol%) was added THF (0.4 mL, 0.5 M) and isoprene (80  $\mu\text{L}$ , 0.8 mmol, 400 mol%). The tube was sealed with a PTFE lined cap and the reaction vessel was placed in a 115 °C oil bath and was allowed to stir for 48 hours, at which point the reaction vessel was removed from the oil bath and the reaction mixture was allowed to reach ambient temperature. The solvent was removed *in vacuo* and the residue was subjected to flash column chromatography ( $\text{SiO}_2$ ) under the noted conditions to furnish products **3a-3m**. Diastereomeric ratios were determined by  $^1\text{H}$  NMR of crude reaction mixtures, regioisomeric ratios were determined by  $^1\text{H}$  NMR of a purified mixture of regioisomers, and enantiomeric excesses were determined by chiral stationary phase HPLC.

**Racemic reactions** were performed using *rac*-BINAP (6.2 mg, 0.01 mmol, 5 mol%) as ligand.

**(S)-7-(benzyloxy)-3,3-dimethylhept-1-en-4-ol (3a)**

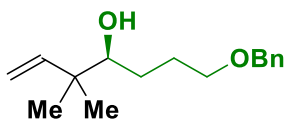

Alcohol **2a** (36.0 mg, 0.2 mmol) was subjected to standard reaction conditions (115 °C, 48 h). Flash column chromatography (SiO<sub>2</sub>: 8:92 EtOAc:hexanes) provided the title compound **3a** as a yellow oil in 75% yield (37.4 mg, 0.15 mmol, 17:1 rr, 90% ee).

Aldehyde *dehydro-2a* (36.0 mg, 0.2 mmol) was subjected to standard reaction conditions (115°C, 48 h) with 2-PrOH (22 μL, 0.3 mmol, 150 mol%). Flash column chromatography (SiO<sub>2</sub>: 8:92 EtOAc:hexanes) provided title compound **3a** as a yellow oil in 76% Yield (37.7 mg, 0.15 mmol, 15:1 rr, 90% ee).

**Separation of regioisomers:** Flash column chromatography (SiO<sub>2</sub>: 2:98 EtOAc:hexanes).

**TLC (SiO<sub>2</sub>):** R<sub>f</sub> = 0.5 (1:3 EtOAc:hexanes).

**<sup>1</sup>H NMR** (400 MHz, CDCl<sub>3</sub>): δ 7.36 – 7.31 (m, 4H), 7.28 (td, J = 5.9, 2.5 Hz, 1H), 5.83 (dd, J = 17.5, 10.8 Hz, 1H), 5.07 (dd, J = 10.8, 1.4 Hz, 1H), 5.04 (dd, J = 17.5, 1.4 Hz, 1H), 4.52 (s, 2H), 3.51 (t, J = 6.0 Hz, 2H), 3.27 (ddd, J = 10.7, 4.6, 1.7 Hz, 1H), 2.04 (d, J = 4.6 Hz, 1H), 1.83 (dt, J = 10.7, 5.8 Hz, 1H), 1.69 (m, 2H), 1.29 (td, J = 10.7, 5.8 Hz, 1H), 1.01 (s, 6H).

**<sup>13</sup>C NMR** (101 MHz, CDCl<sub>3</sub>): δ 145.7, 138.6, 128.5, 127.9, 127.7, 113.2, 78.2, 73.1, 70.5, 41.8, 28.7, 27.4, 23.2, 22.5.

**HRMS** (Na<sup>+</sup>, *m/z*) for C<sub>16</sub>H<sub>24</sub>O<sub>2</sub>: calcd. = 271.1669; found = 271.1669.

**FTIR** (neat): 3478, 2959, 2862, 1637, 1496, 1454, 1414, 1361, 1274, 1204, 1091, 1028, 1005, 972, 910, 734, 696 cm<sup>-1</sup>.

**HPLC** (Alcohol **2a**): (Chiralcel columns Amylose 3-1 + Amylose 3-2, Hexane:2-PrOH = 99:01, 0.5 mL/min, 210 nm).

**HPLC** (Aldehyde *dehydro-2a*): (Chiralcel column Amylose 3-1, Hexane:2-PrOH = 99:01, 0.5 mL/min, 210 nm).

[α]<sub>D</sub><sup>24</sup> = -20.9 (c = 0.1, CHCl<sub>3</sub>).



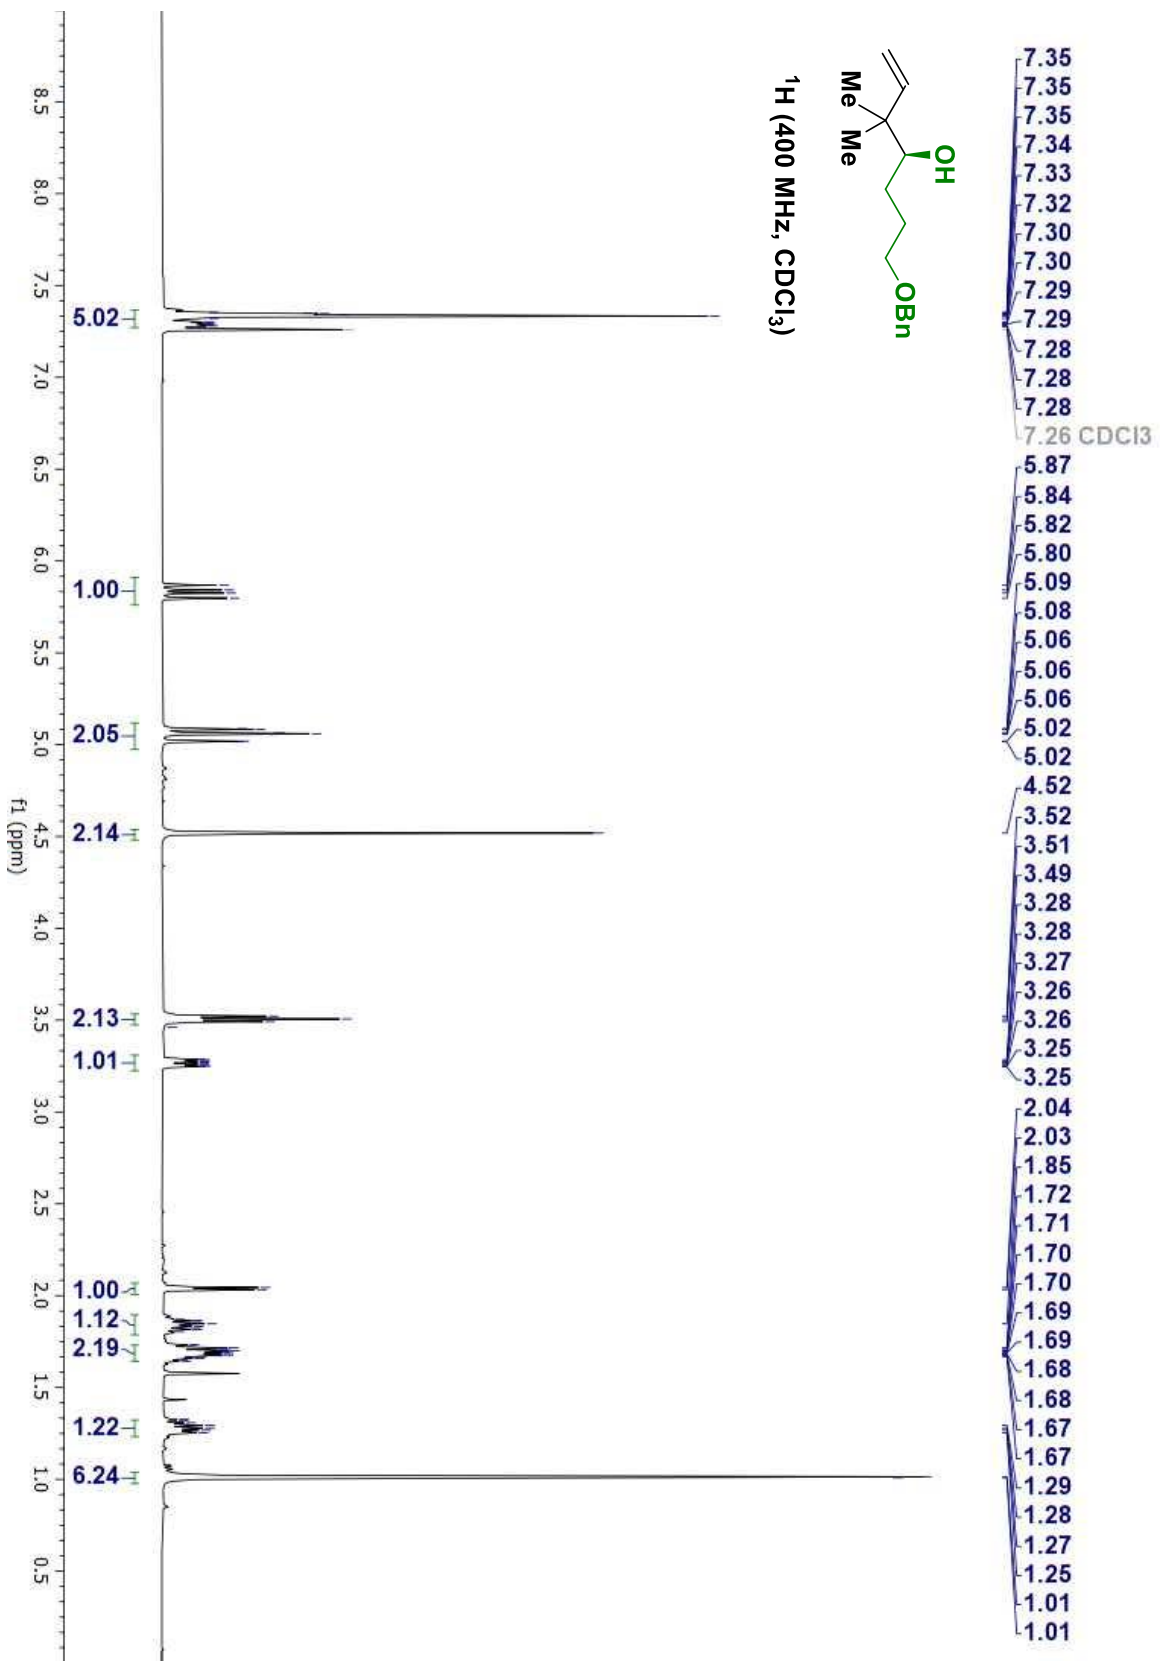

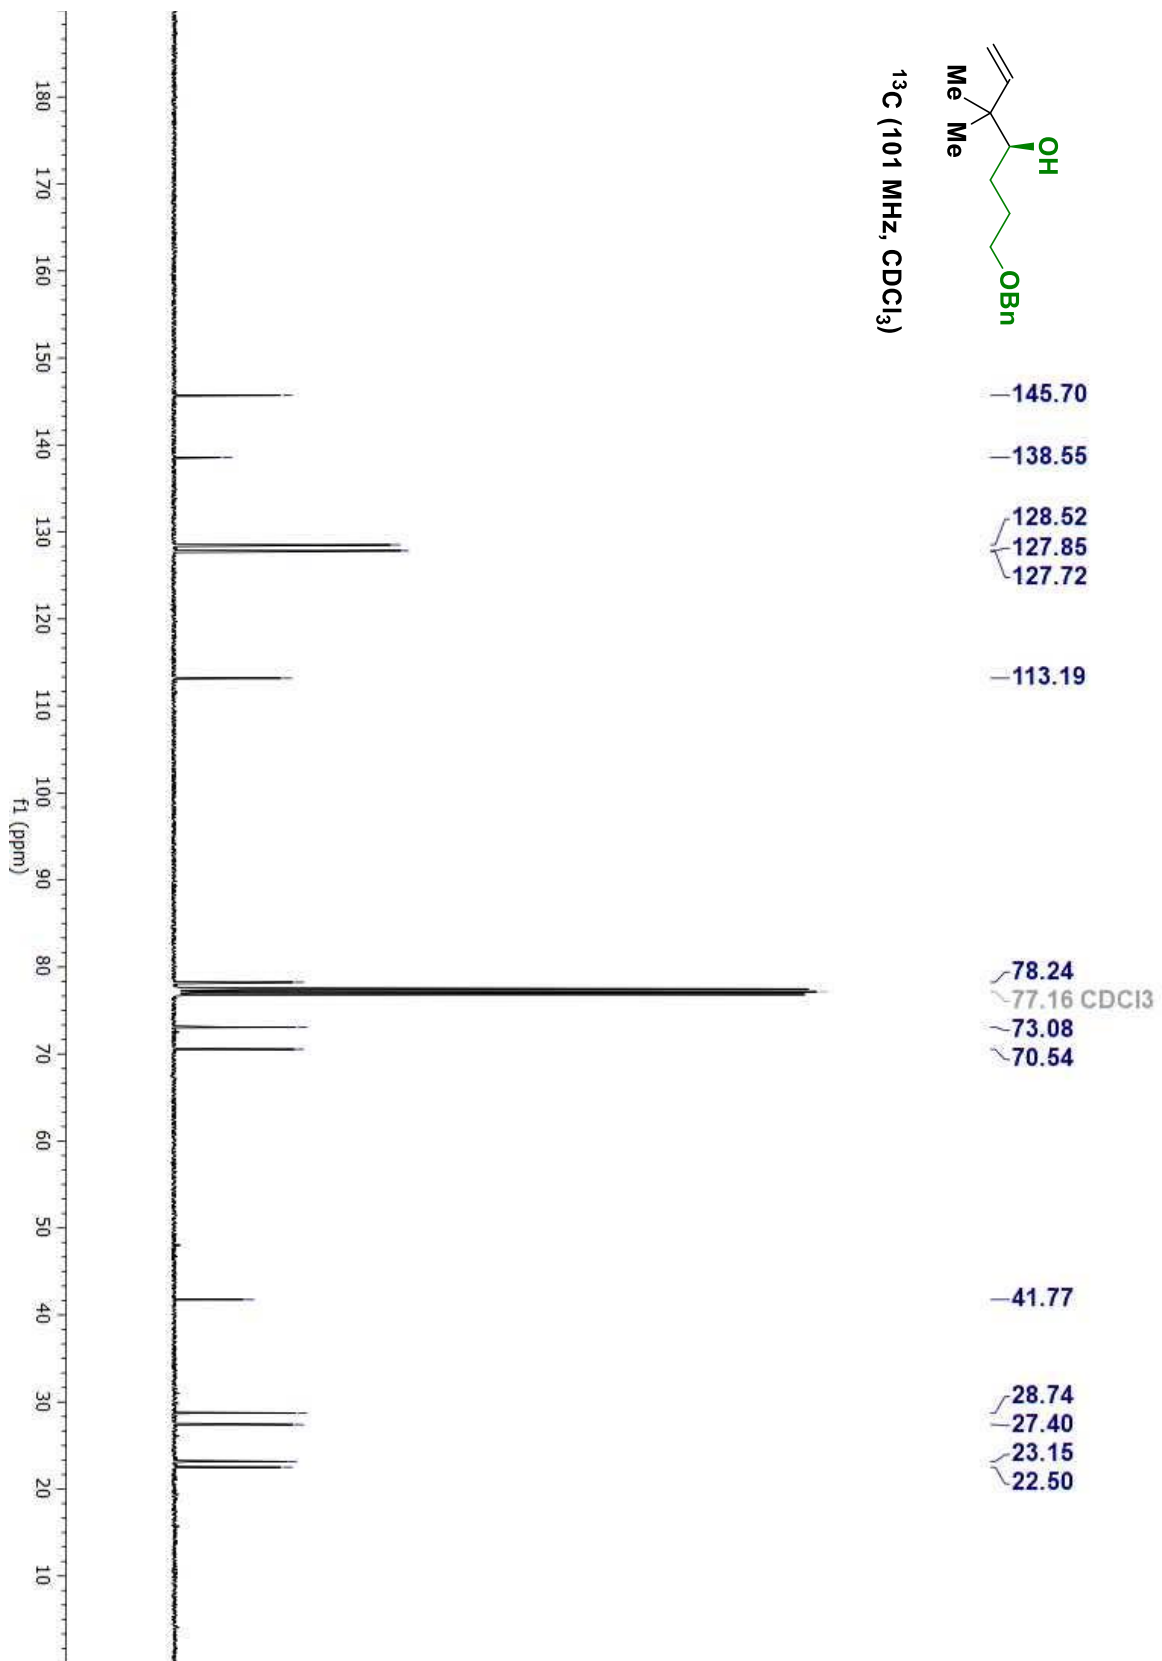

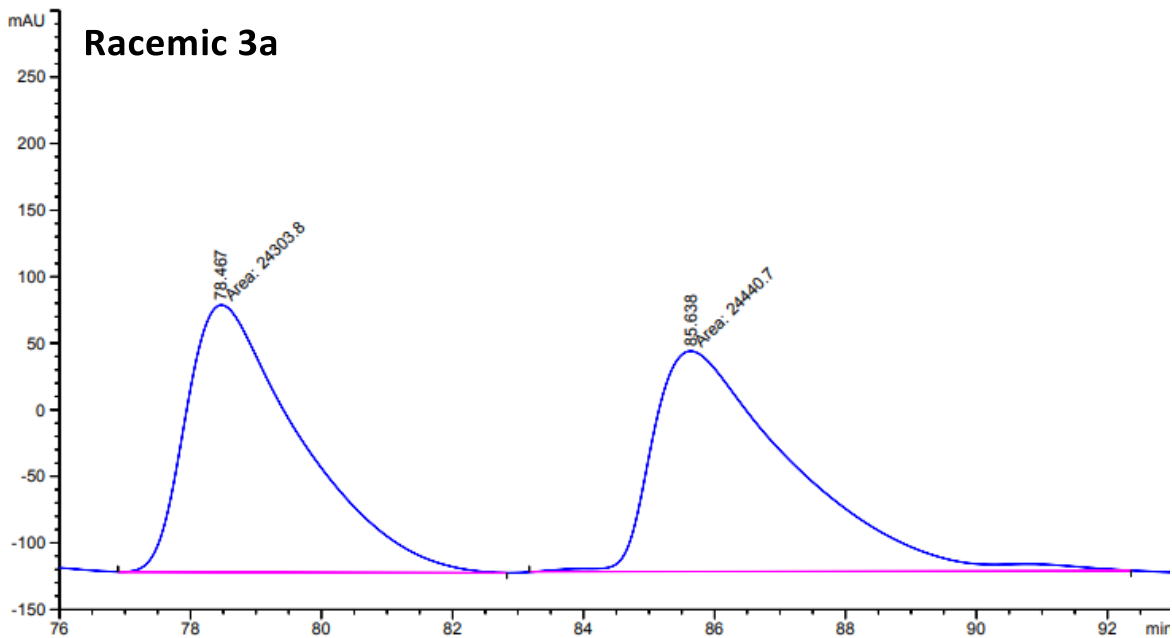

| Peak # | RetTime [min] | Type | Width [min] | Area [mAU*s] | Height [mAU] | Area %  |
|--------|---------------|------|-------------|--------------|--------------|---------|
| 1      | 78.467        | MM   | 2.0171      | 2.43038e4    | 200.81082    | 49.8596 |
| 2      | 85.638        | MM   | 2.4595      | 2.44407e4    | 165.61853    | 50.1404 |

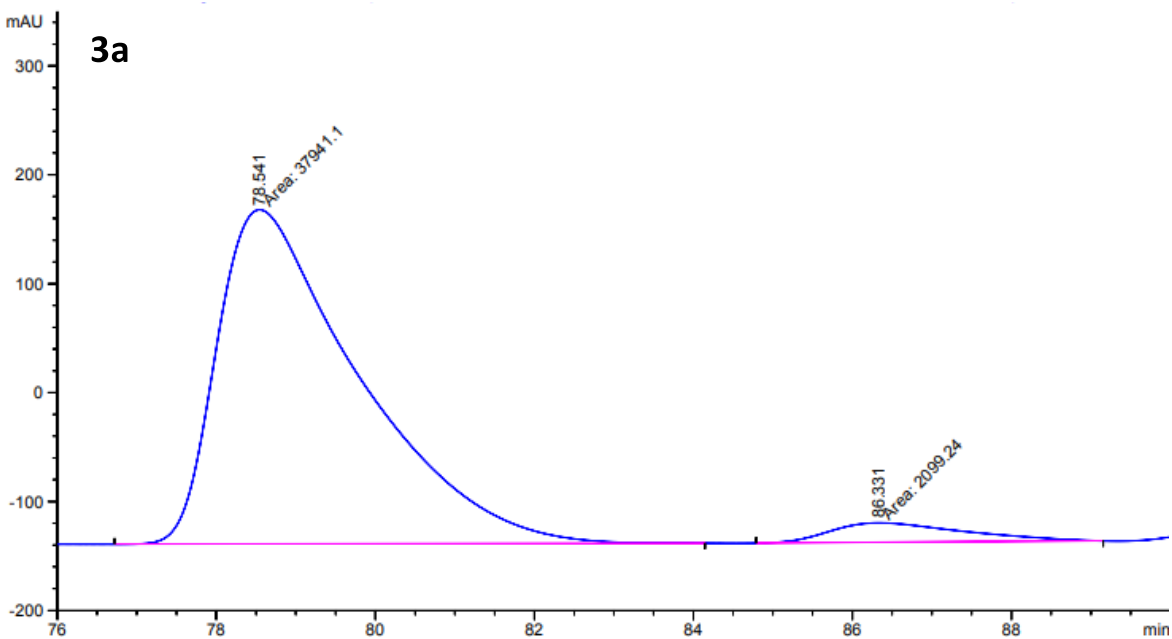

| Peak # | RetTime [min] | Type | Width [min] | Area [mAU*s] | Height [mAU] | Area %  |
|--------|---------------|------|-------------|--------------|--------------|---------|
| 1      | 78.541        | MM   | 2.0606      | 3.79411e4    | 306.87115    | 94.7572 |
| 2      | 86.331        | MM   | 1.9523      | 2099.23828   | 17.92080     | 5.2428  |

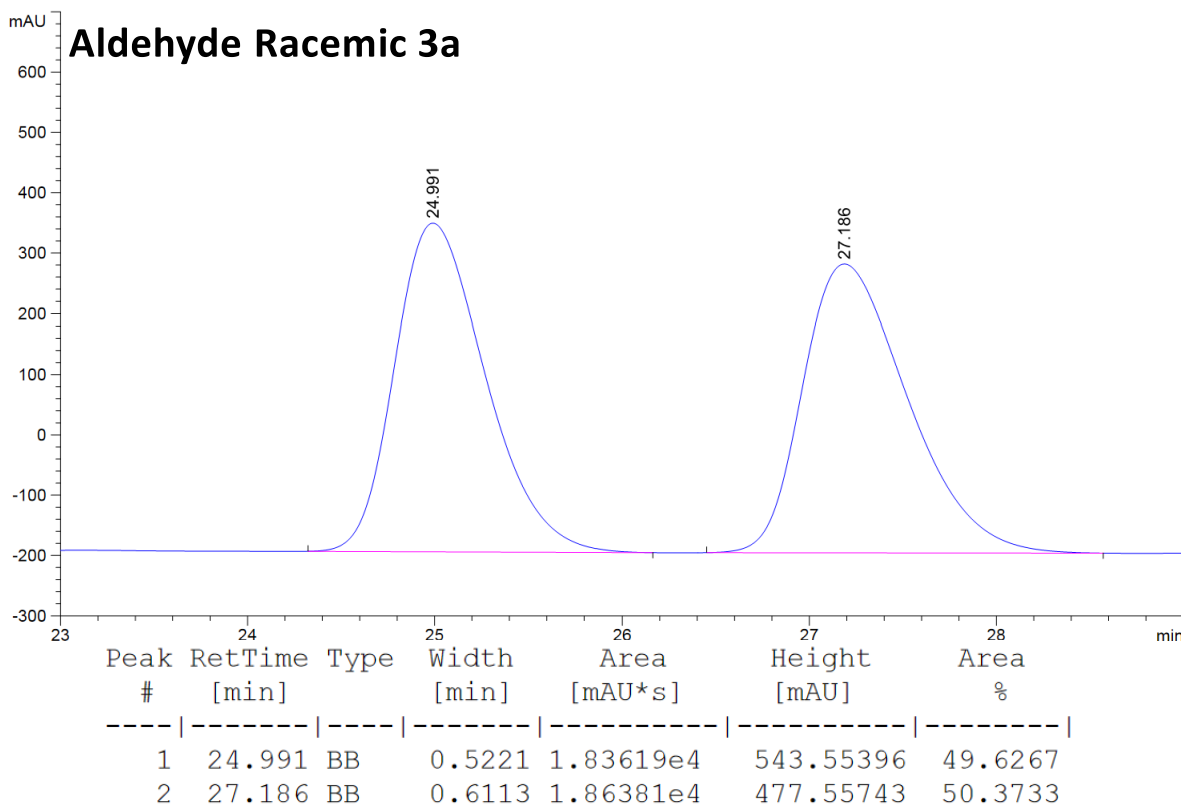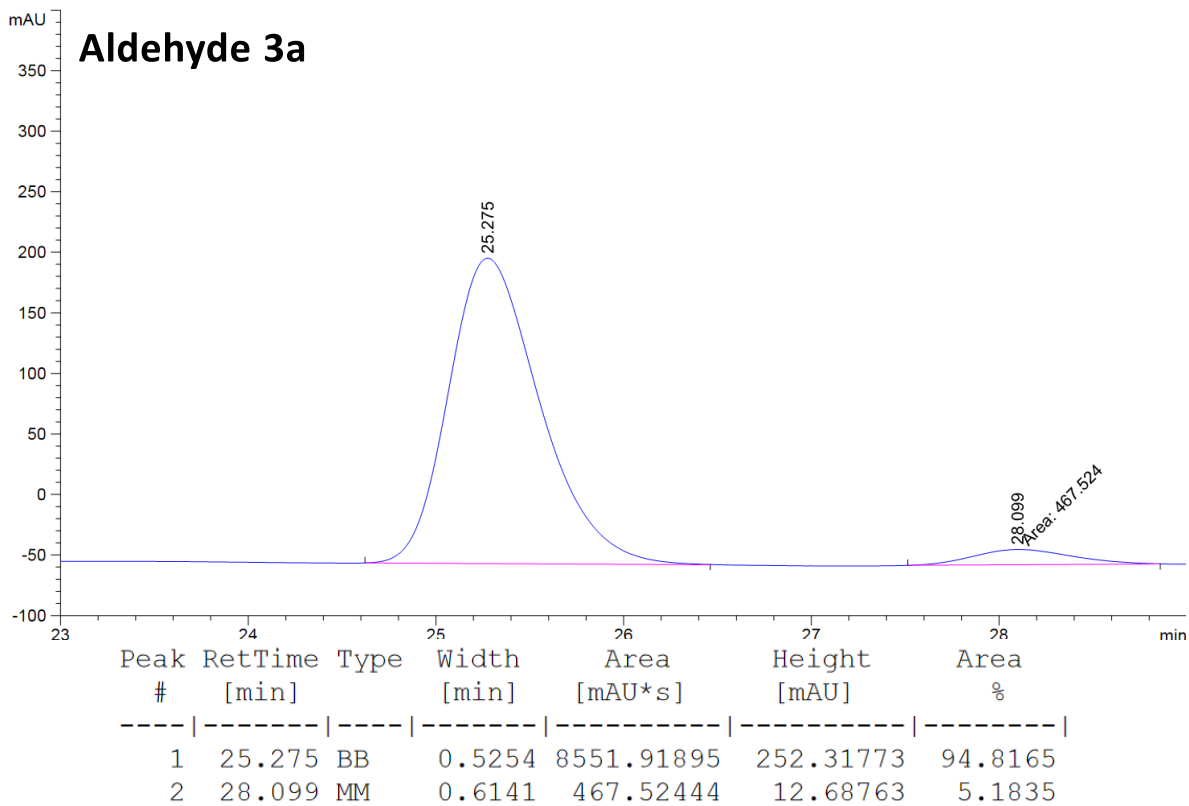

**(S)-3,3-dimethyl-7-(phenylthio)hept-1-en-4-ol (3b)**

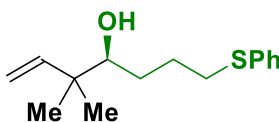

Alcohol **2b** (36.0 mg, 0.2 mmol) was subjected to standard reaction conditions (115 °C, 48 h) with (*S*)-SEGPPOS (7.5 mol%), RuHCl(CO)(PPh<sub>3</sub>)<sub>3</sub> (7.5 mol%), and KI (20 mol%). Flash column chromatography (SiO<sub>2</sub>: 3:97 EtOAc:hexanes) provided the title compound **3b** as a yellow oil in 65% yield (32.4 mg, 0.13 mmol, 16:1 rr, 87% ee).

Aldehyde *dehydro-2b* (36.0 mg, 0.2 mmol) was subjected to standard reaction conditions (115°C, 48 h) with 2-PrOH (22 μL, 0.3 mmol, 150 mol%), (*S*)-SEGPPOS (7.5 mol%), RuHCl(CO)(PPh<sub>3</sub>)<sub>3</sub> (7.5 mol%), and KI (20 mol%). Flash column chromatography (SiO<sub>2</sub>: 3:97 EtOAc:hexanes) provided the title compound **3b** as a yellow oil in 69% Yield (34.2 mg, 0.14 mmol, 14:1 rr, 86% ee).

**Separation of regioisomers:** Flash column chromatography (SiO<sub>2</sub>: 1:99 EtOAc:hexanes).

**TLC (SiO<sub>2</sub>):** R<sub>f</sub> = 0.4 (1:3 EtOAc:hexanes).

**<sup>1</sup>H NMR** (400 MHz, CDCl<sub>3</sub>): δ 7.37 – 7.32 (m, 2H), 7.30 – 7.26 (m, 2H), 7.20 – 7.14 (m, 1H), 5.80 (dd, *J* = 17.5, 10.8 Hz, 1H), 5.11 (dd, *J* = 10.8, 1.4 Hz, 1H), 5.06 (dd, *J* = 17.5, 1.4 Hz, 1H), 3.25 (ddd, *J* = 10.8, 5.0, 1.6 Hz, 1H), 2.96 (t, *J* = 7.1 Hz, 2H), 2.00 – 1.88 (m, 1H), 1.74 – 1.64 (m, 2H), 1.47 (d, *J* = 5.0 Hz, 1H), 1.40 – 1.31 (m, 1H), 1.01 (s, 6H).

**<sup>13</sup>C NMR** (101 MHz, CDCl<sub>3</sub>): δ 145.3, 136.9, 129.2, 129.0, 125.9, 113.8, 77.9, 41.9, 33.8, 30.5, 26.8, 23.3, 22.0.

**HRMS** (Na<sup>+</sup>, *m/z*) for C<sub>15</sub>H<sub>22</sub>OS: calcd. = 273.1284; found = 273.1291.

**FTIR** (neat): 3444, 3077, 2958, 2868, 1639, 1584, 1480, 1285, 1070, 915, 738, 690 cm<sup>-1</sup>.

**HPLC:** (Chiralcel columns Amylose 3-1 + Amylose 3-2, Hexane:2-PrOH = 99:01, 0.5 mL/min, 210 nm).

**[α]<sub>D</sub><sup>24</sup>** = -2.75 (c = 1.0, CHCl<sub>3</sub>).

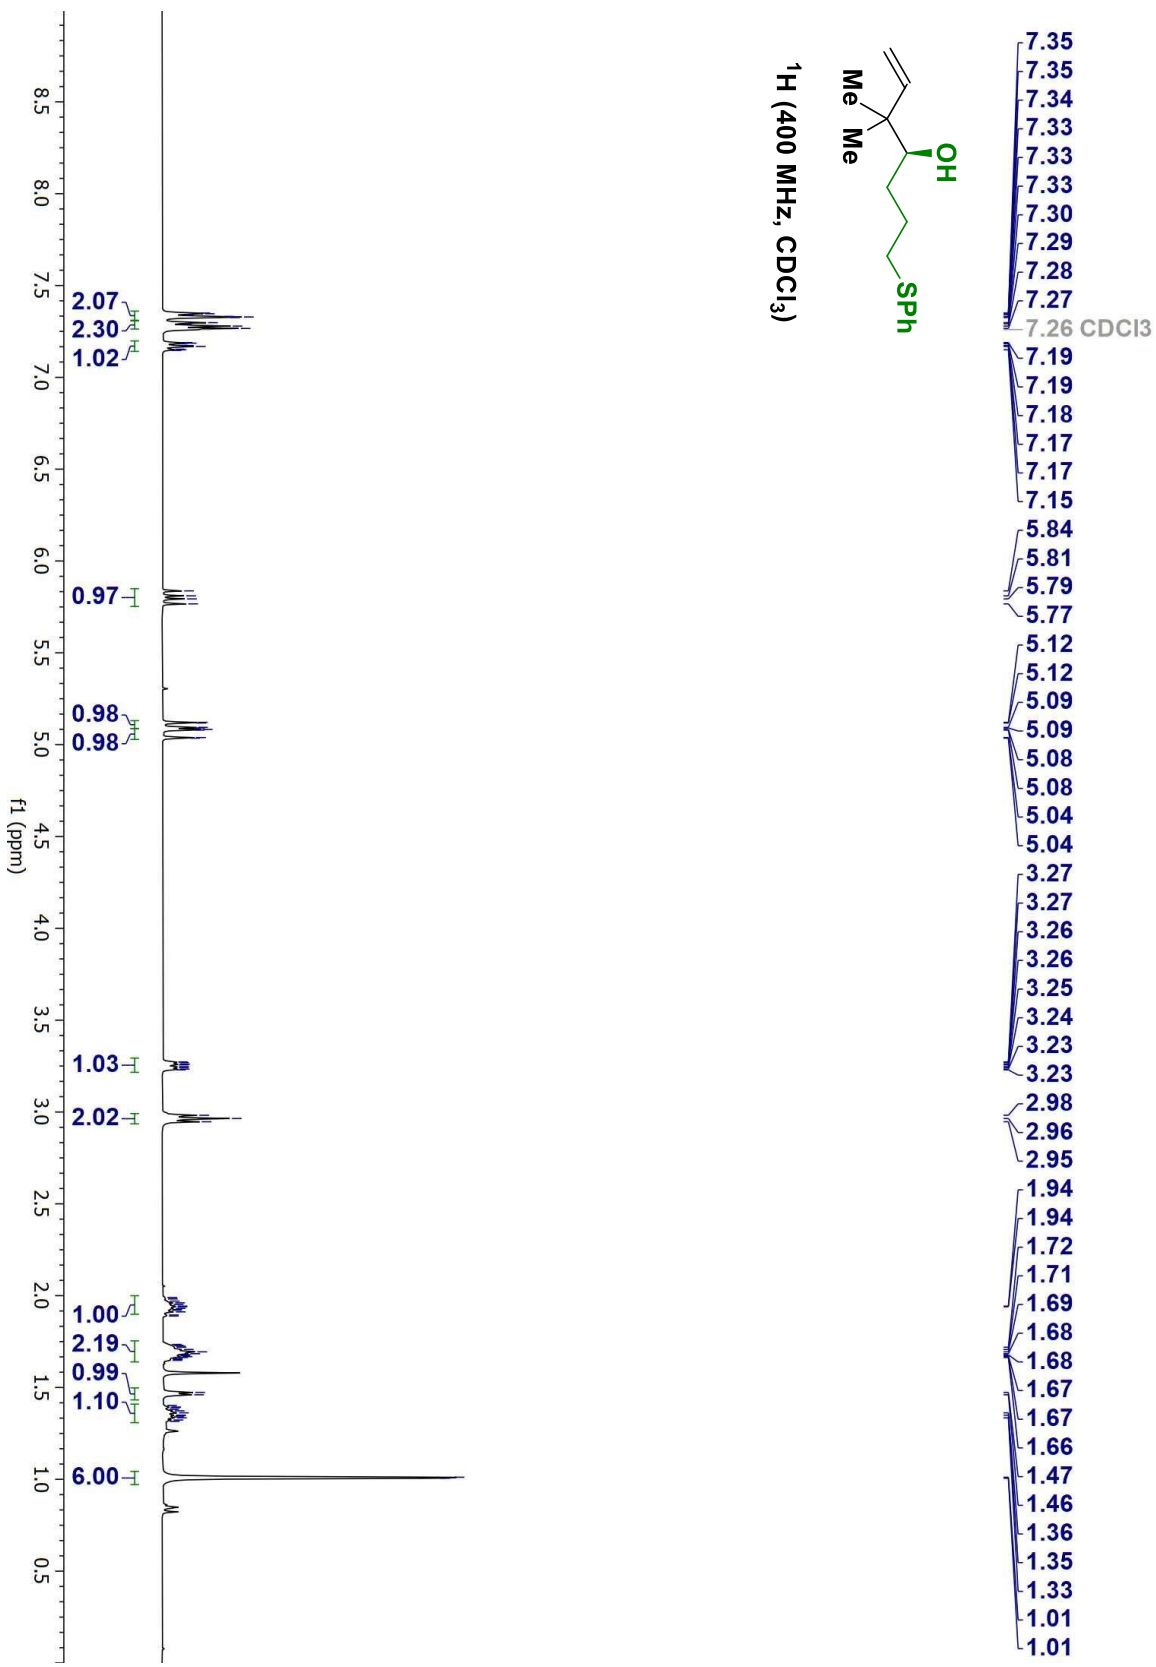

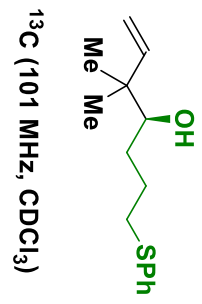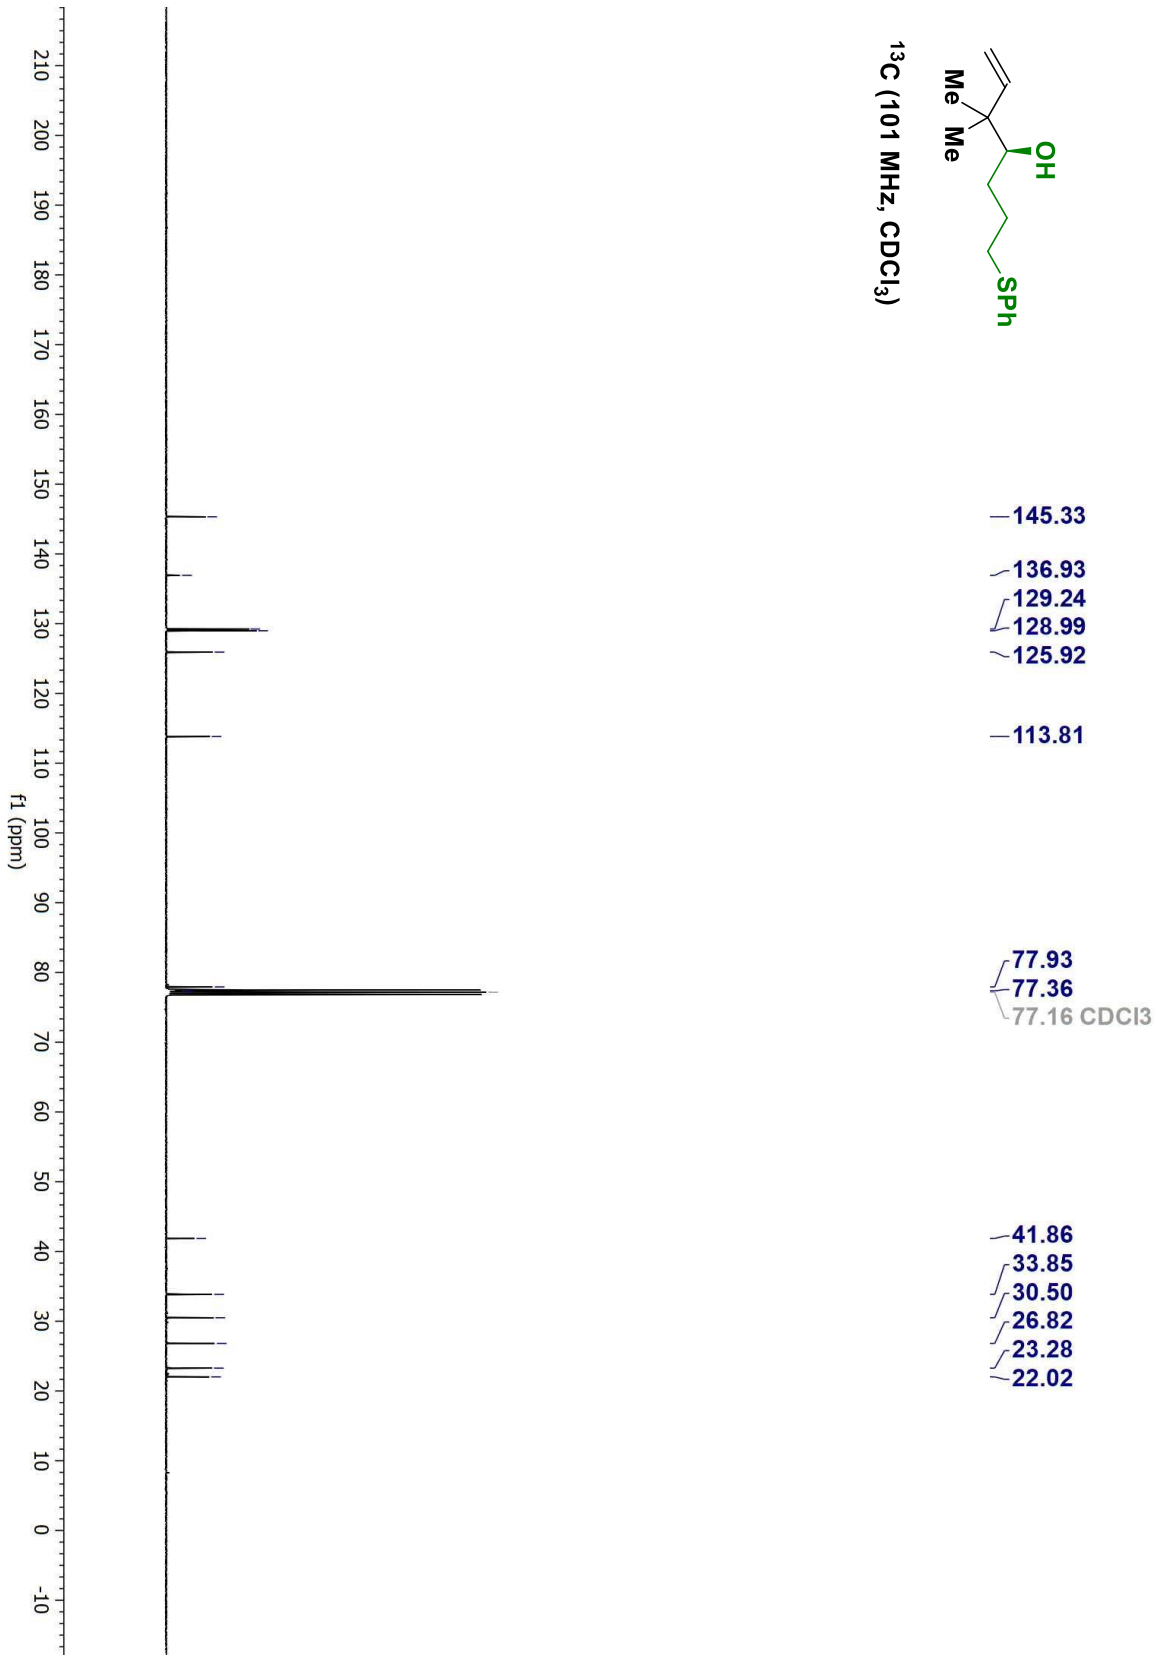

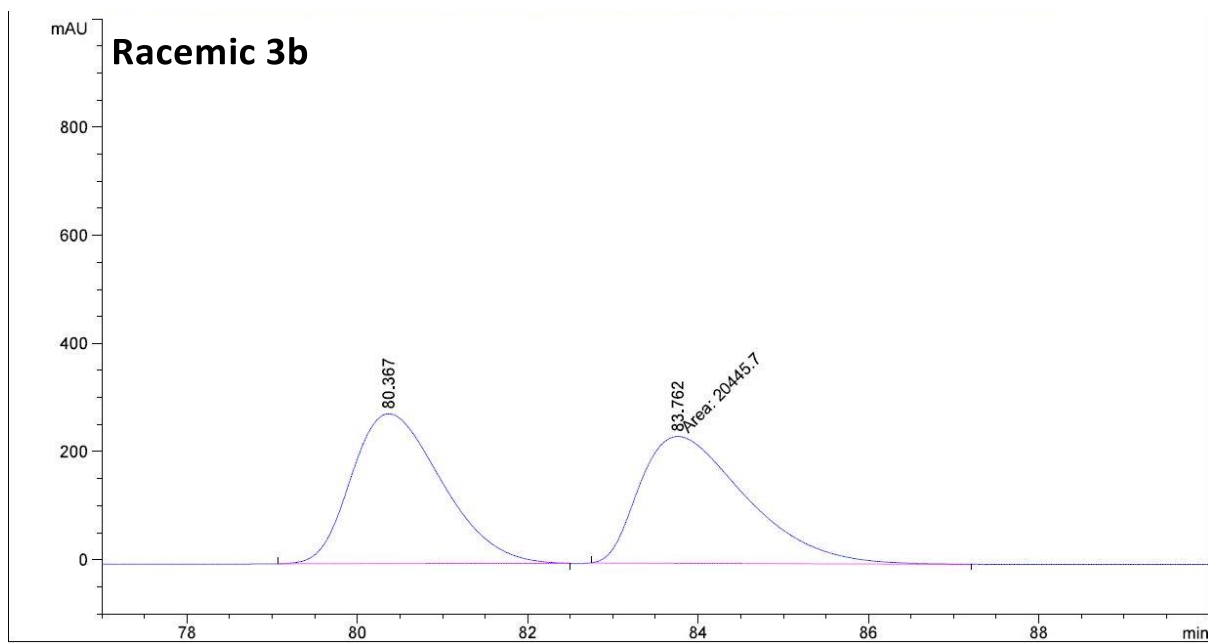

| Peak # | RetTime [min] | Type | Width [min] | Area [mAU*s] | Height [mAU] | Area %  |
|--------|---------------|------|-------------|--------------|--------------|---------|
| 1      | 80.367        | BB   | 1.1470      | 2.04634e4    | 277.28897    | 50.0217 |
| 2      | 83.762        | MM   | 1.4503      | 2.04457e4    | 234.95982    | 49.9783 |

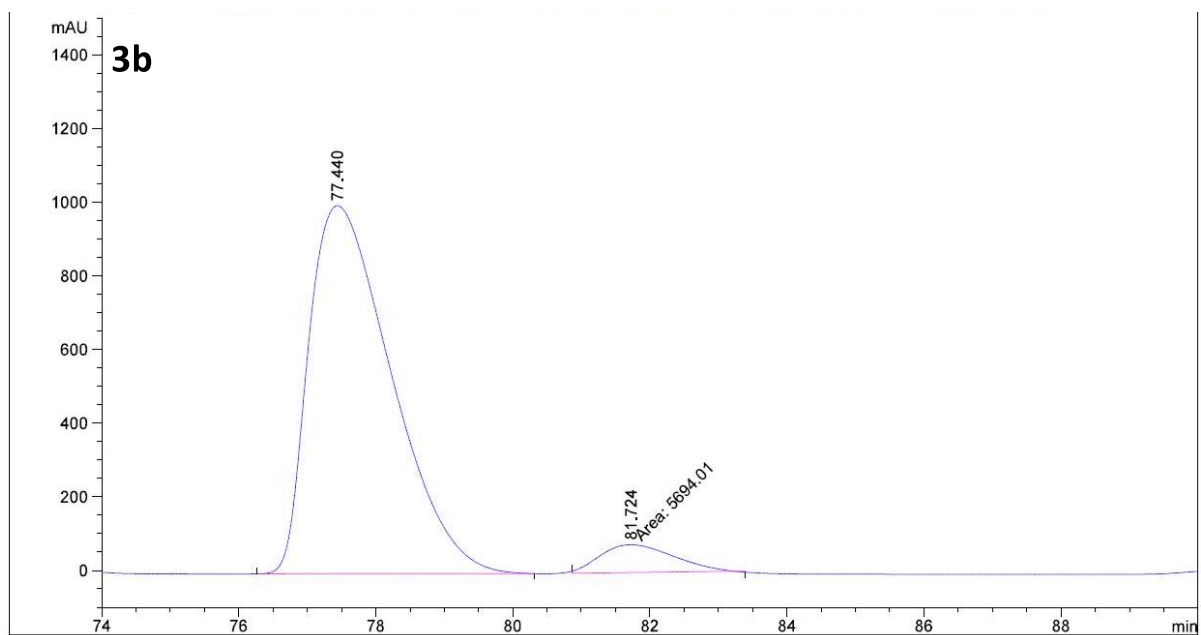

| Peak # | RetTime [min] | Type | Width [min] | Area [mAU*s] | Height [mAU] | Area %  |
|--------|---------------|------|-------------|--------------|--------------|---------|
| 1      | 77.440        | BB   | 1.2873      | 8.37597e4    | 999.86316    | 93.6347 |
| 2      | 81.724        | MM   | 1.2476      | 5694.01172   | 76.06358     | 6.3653  |



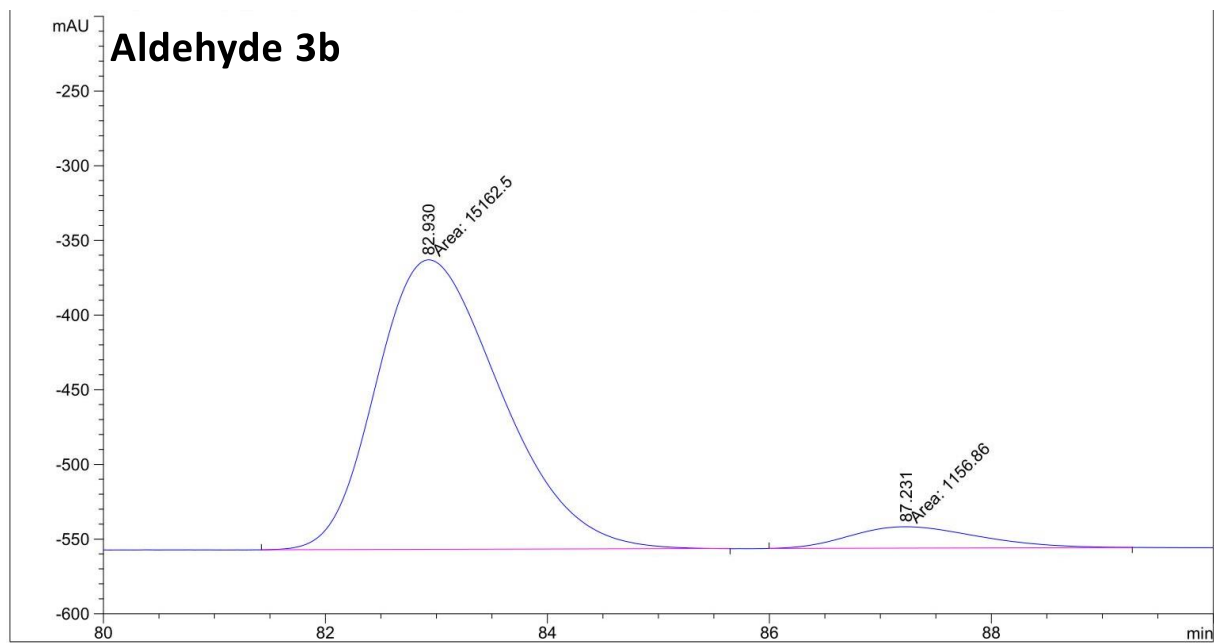

| Peak # | RetTime [min] | Type | Width [min] | Area [mAU*s] | Height [mAU] | Area %  |
|--------|---------------|------|-------------|--------------|--------------|---------|
| 1      | 82.930        | MM   | 1.3031      | 1.51625e4    | 193.92921    | 92.9111 |
| 2      | 87.231        | MM   | 1.3438      | 1156.86389   | 14.34767     | 7.0889  |

**(R)-2-(2-hydroxy-3,3-dimethylpent-4-en-1-yl)isoindoline-1,3-dione (3c)**

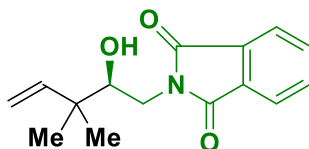

Alcohol **2c** (38.2 mg, 0.2 mmol) was subjected to standard reaction conditions (120 °C, 48 h). Flash column chromatography (SiO<sub>2</sub>: 8:92 EtOAc:hexanes) provided the title compound **3c** as a yellow oil in 72% yield (37.3 mg, 0.14 mmol, >20:1 rr, 84% ee).

**TLC** (SiO<sub>2</sub>): R<sub>f</sub> = 0.3 (1:2 EtOAc:hexanes).

**<sup>1</sup>H NMR** (400 MHz, CDCl<sub>3</sub>): δ 7.85 (d, J = 5.4 Hz, 2H), 7.72 (d, J = 5.5 Hz, 2H), 5.94 (dd, J = 17.4, 10.9 Hz, 1H), 5.19 – 5.08 (m, 2H), 3.94 – 3.84 (m, 1H), 3.70 – 3.56 (m, 2H), 2.22 (d, J = 6.0 Hz, 1H), 1.14 (s, 6H).

**<sup>13</sup>C NMR** (101 MHz, CDCl<sub>3</sub>): δ 169.1, 143.9, 134.2, 132.2, 123.5, 114.1, 77.4, 76.9, 41.1, 23.4, 22.6.

**HRMS** (Na<sup>+</sup>, *m/z*) for C<sub>15</sub>H<sub>17</sub>NO<sub>3</sub>: calcd. = 282.1192; found = 282.1194.

**FTIR** (neat): 3325, 2967, 2833, 1759, 1624, 1574, 1424, 1294, 1013, 935, 724 cm<sup>-1</sup>.

**HPLC**: (Chiralcel columns Cellulose-5, Hexane:2-PrOH = 97:03, 0.5 mL/min, 210 nm).

[α]<sub>D</sub><sup>24</sup> = -8.5 (c = 1.0, CHCl<sub>3</sub>).

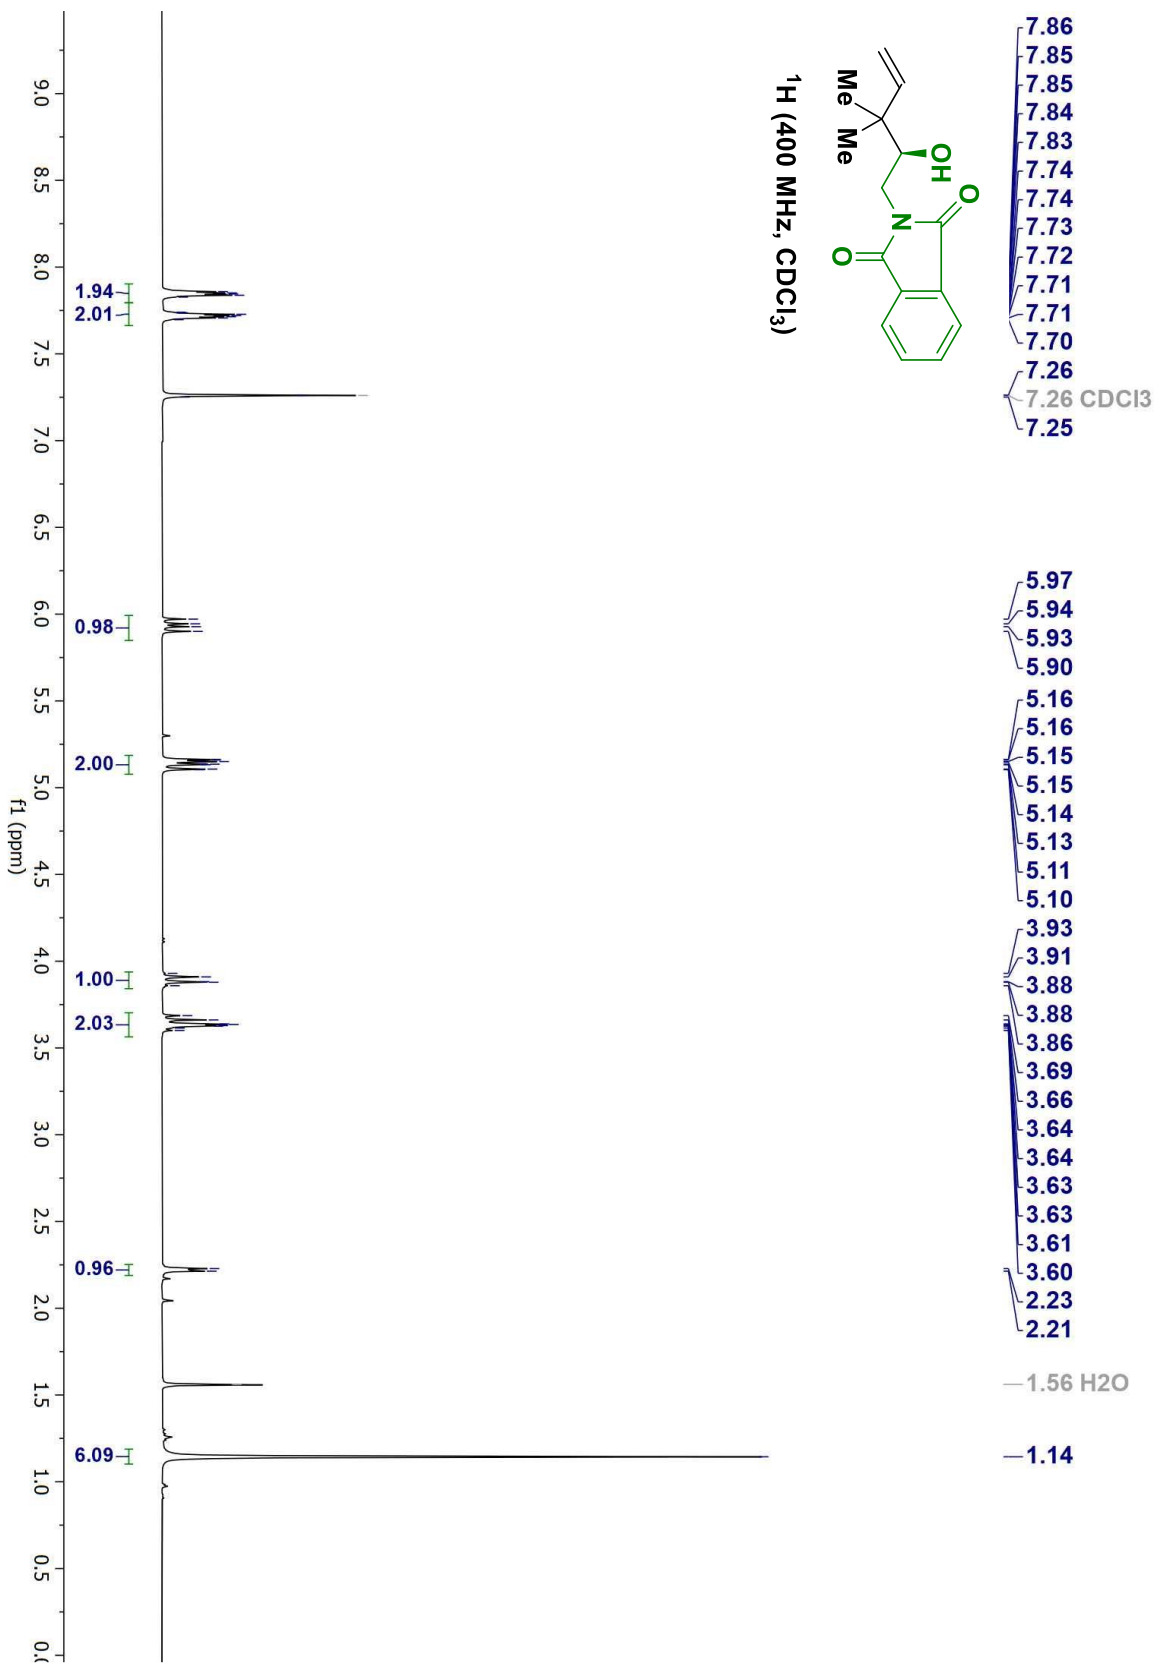

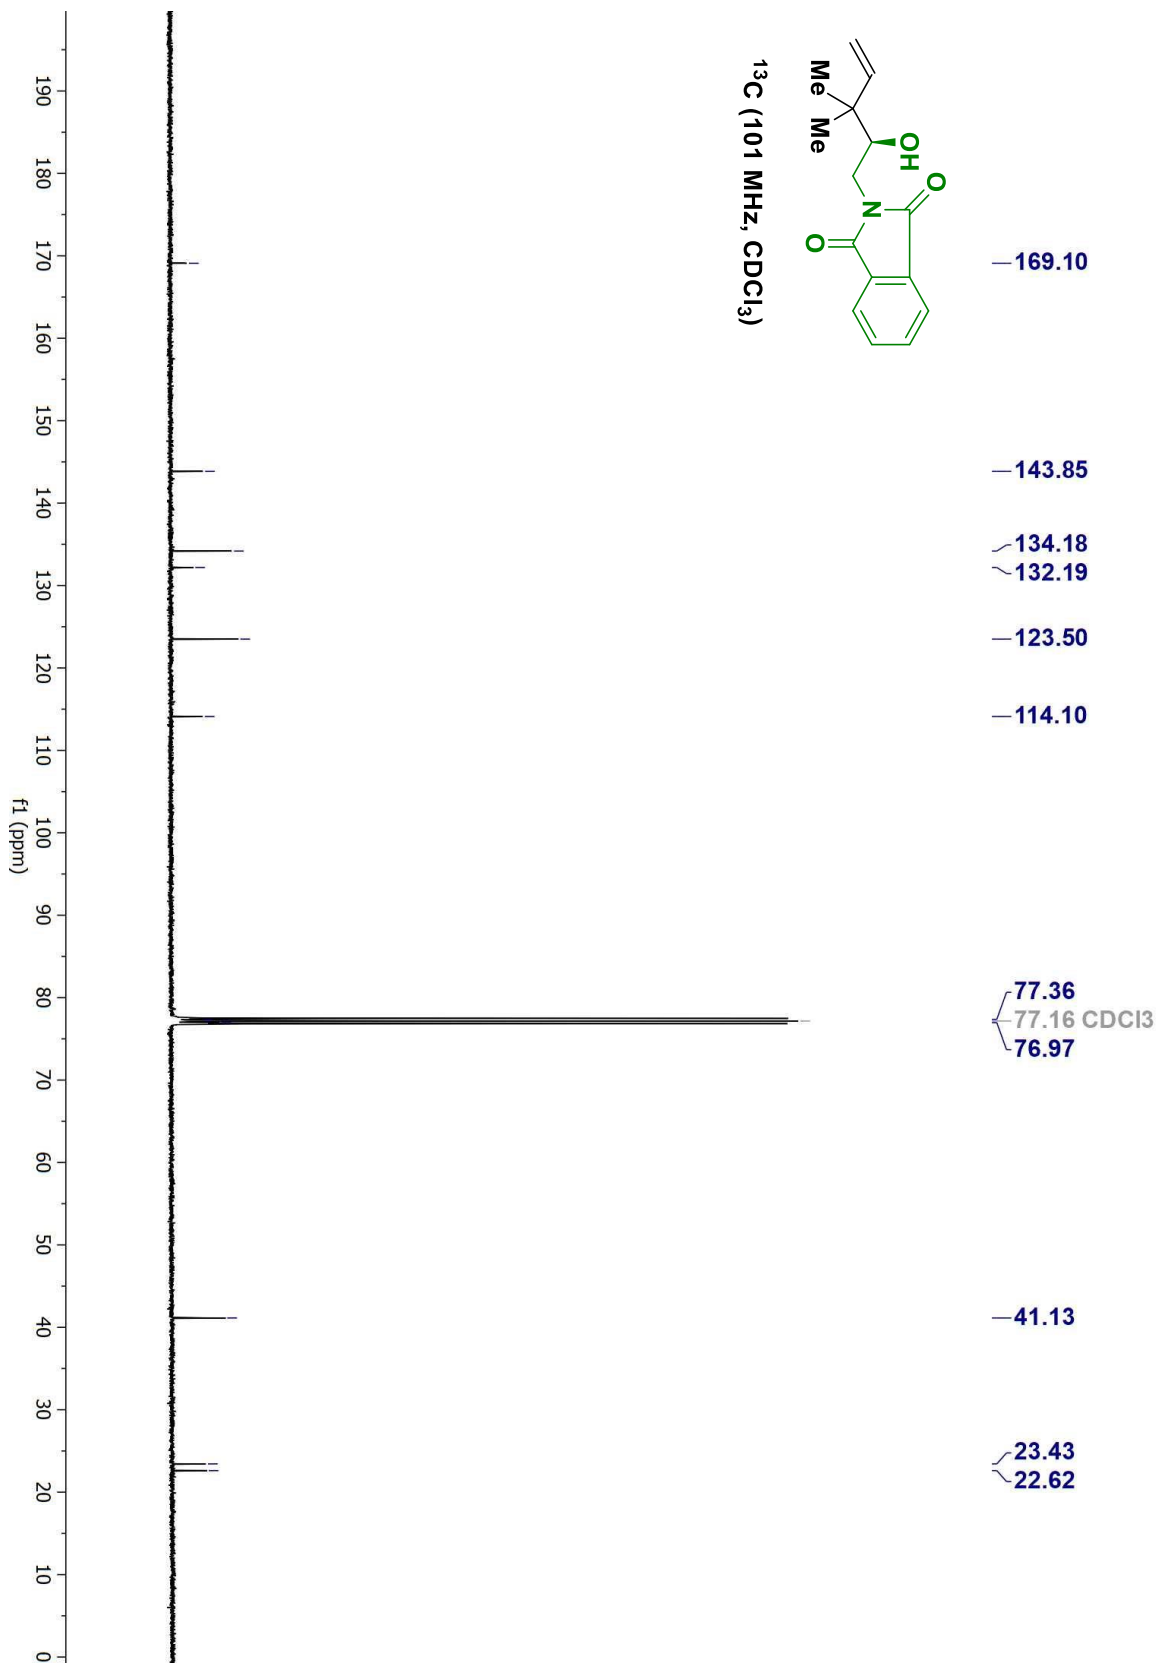

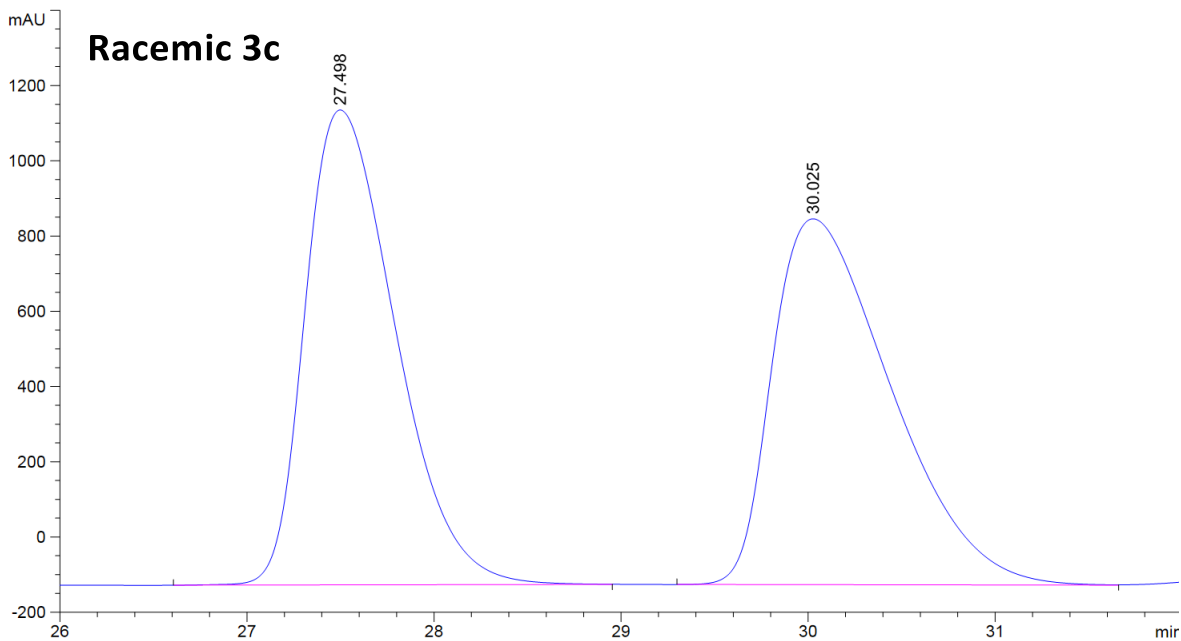

| Peak # | RetTime [min] | Type | Width [min] | Area [mAU*s] | Height [mAU] | Area %  |
|--------|---------------|------|-------------|--------------|--------------|---------|
| 1      | 27.498        | BB   | 0.5251      | 4.23250e4    | 1262.66516   | 49.7265 |
| 2      | 30.025        | BB   | 0.6792      | 4.27906e4    | 972.75665    | 50.2735 |

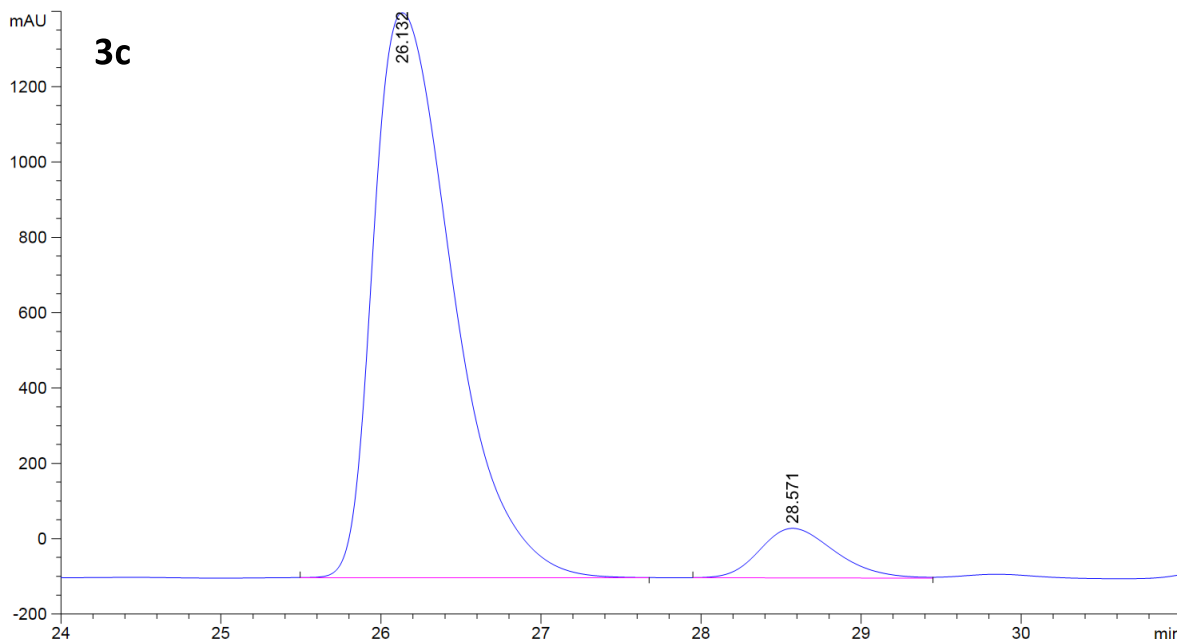

| Peak # | RetTime [min] | Type | Width [min] | Area [mAU*s] | Height [mAU] | Area %  |
|--------|---------------|------|-------------|--------------|--------------|---------|
| 1      | 26.132        | BB   | 0.5361      | 5.16912e4    | 1499.88110   | 92.2561 |
| 2      | 28.571        | BB   | 0.5119      | 4338.94336   | 131.84384    | 7.7439  |

**Tert-butyl (S)-4-(3-hydroxy-4,4-dimethylhex-5-en-1-yl)piperidine-1-carboxylate (3d)**

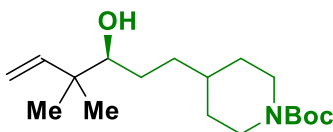

Alcohol **2d** (48.6 mg, 0.2 mmol) was subjected to standard reaction conditions (120 °C, 48 h). Flash column chromatography (SiO<sub>2</sub>: 3:97 EtOAc:hexanes) provided the title compound **3d** as a yellow oil in 70% yield (43.4 mg, 0.14 mmol, 15:1 rr, 91% ee).

**Separation of regioisomers:** Flash column chromatography (SiO<sub>2</sub>: 2:98 Acetone:hexanes).

**TLC (SiO<sub>2</sub>):** R<sub>f</sub> = 0.25 (1:4 EtOAc:Hexanes).

**<sup>1</sup>H NMR** (500 MHz, CDCl<sub>3</sub>): δ 5.80 (dd, *J* = 17.5, 10.8 Hz, 1H), 5.09 (dd, *J* = 10.8, 1.4 Hz, 1H), 5.05 (dd, *J* = 17.5, 1.4 Hz, 1H), 4.06 (s, 2H), 3.21 (dd, *J* = 9.0, 4.7 Hz, 1H), 2.66 (s, 2H), 1.68 – 1.60 (m, 2H), 1.55 – 1.51 (m, 2H), 1.45 (s, 9H), 1.26 – 1.20 (m, 3H), 1.14 – 1.02 (m, 2H), 1.00 (s, 6H).

**<sup>13</sup>C NMR** (126 MHz, CDCl<sub>3</sub>): δ 155.1, 145.5, 113.7, 79.3, 78.5, 77.4, 41.9, 36.2, 34.0, 28.6, 28.4, 23.3, 22.1.

**HRMS** (Na<sup>+</sup>, *m/z*) for C<sub>18</sub>H<sub>33</sub>NO<sub>3</sub>: calcd. = 334.2353; found = 334.2344.

**FTIR** (neat): 3025, 2973, 2929, 1694, 1469, 1365, 1276, and 1165 cm<sup>-1</sup>.

**HPLC:** (Phenomenex LC Columns Cellulose-2 + Cellulose-5, Hexane:2-PrOH = 98:02, 0.5 mL/150min, 254 nm).

**[α]<sub>D</sub><sup>24</sup>** = -4.0 (c = 0.5, CHCl<sub>3</sub>).

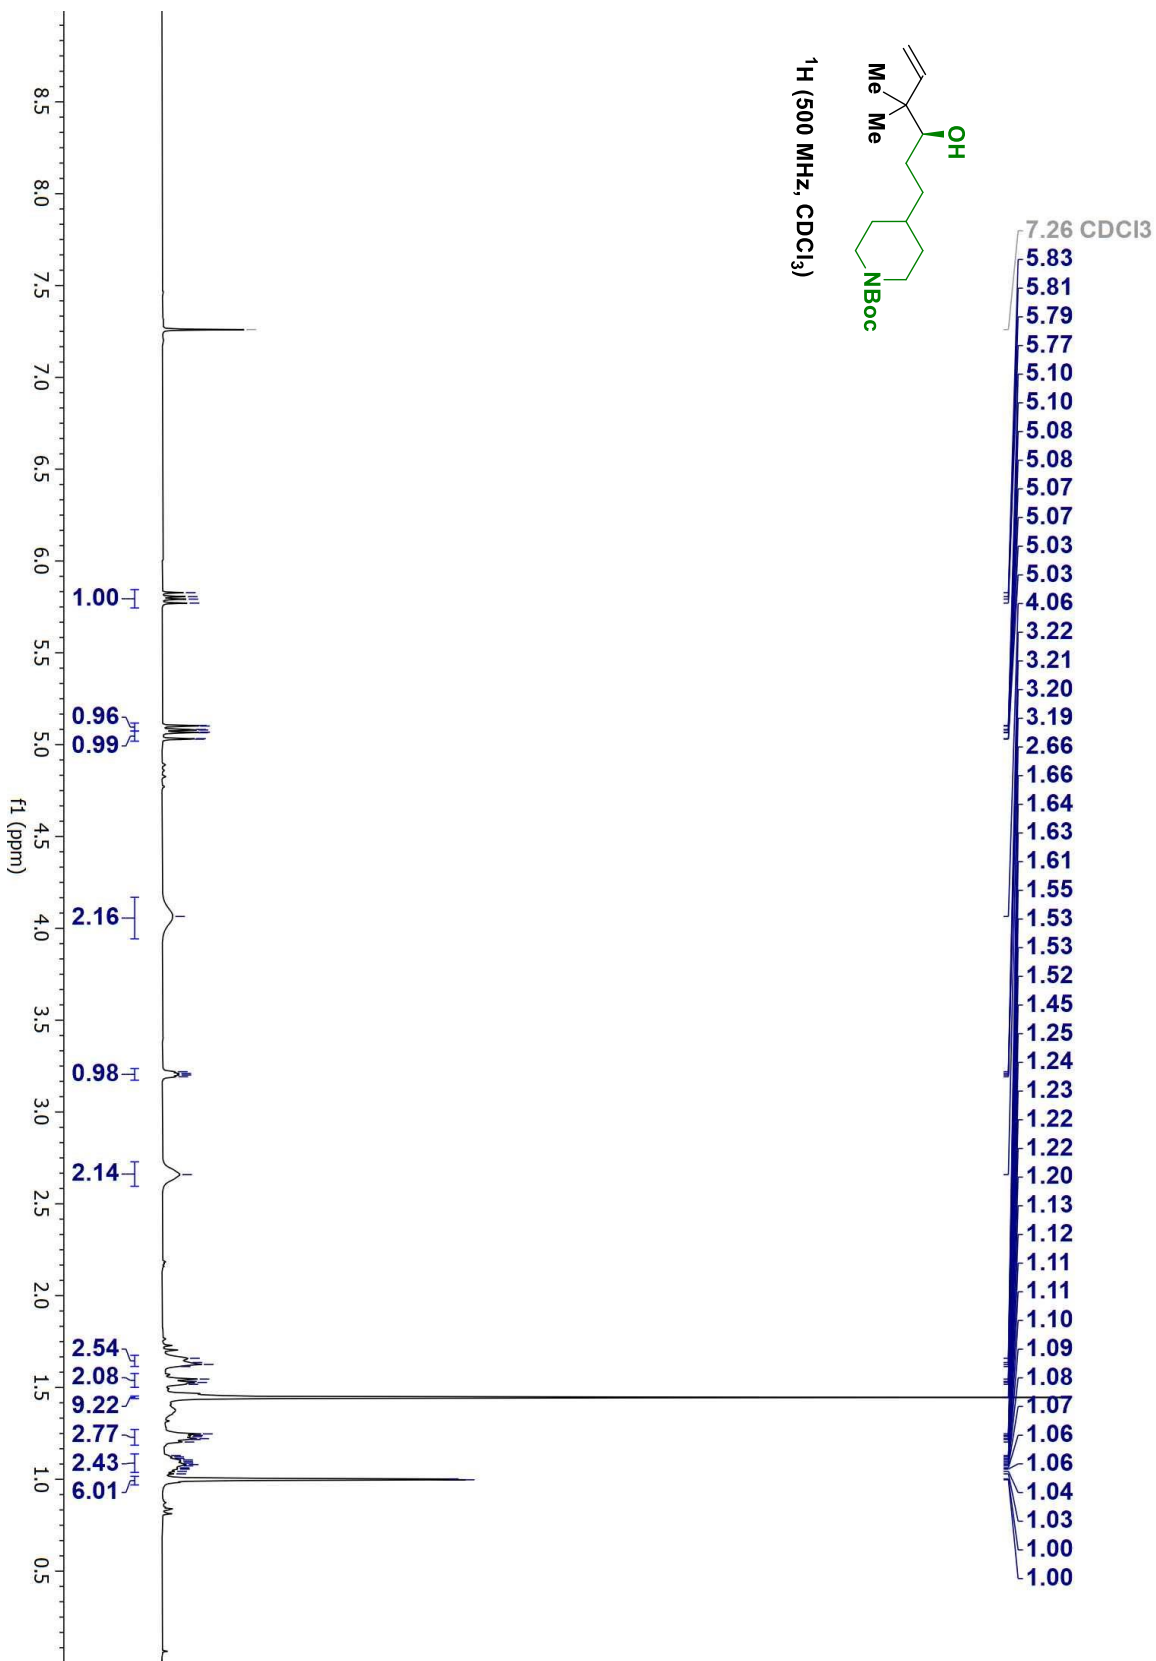

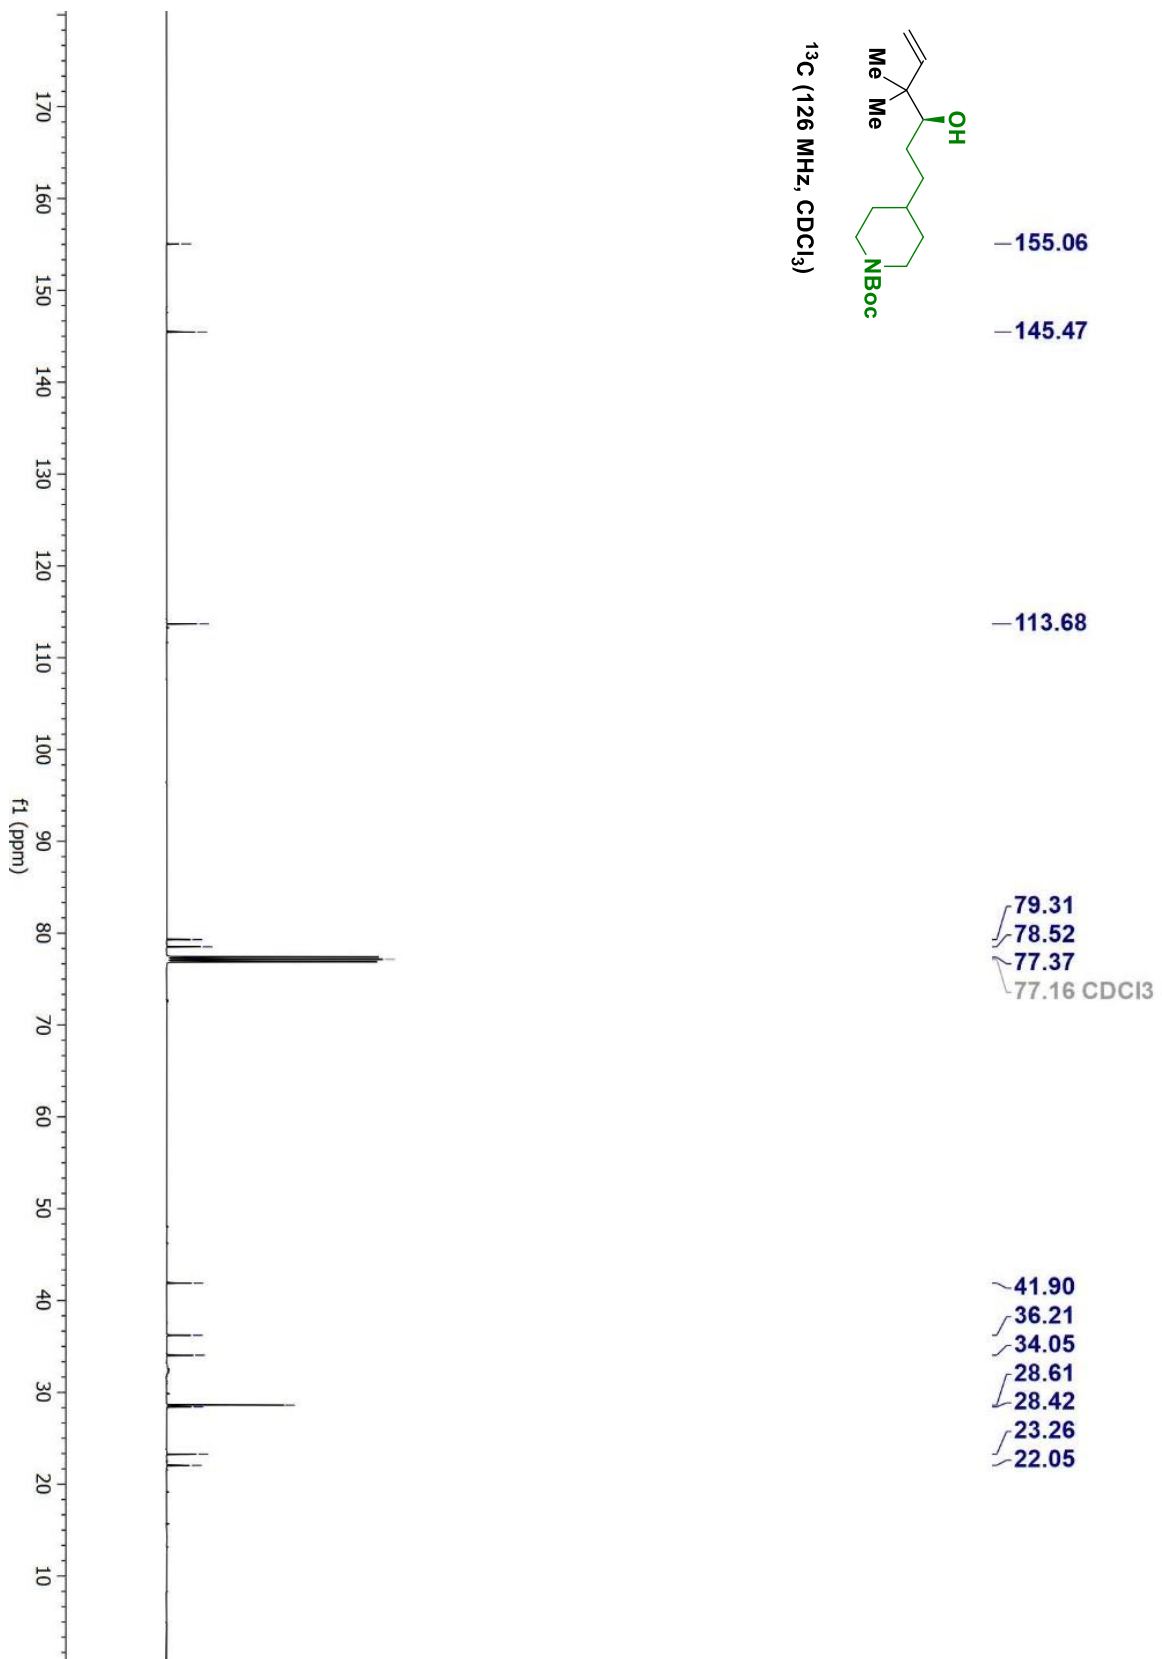



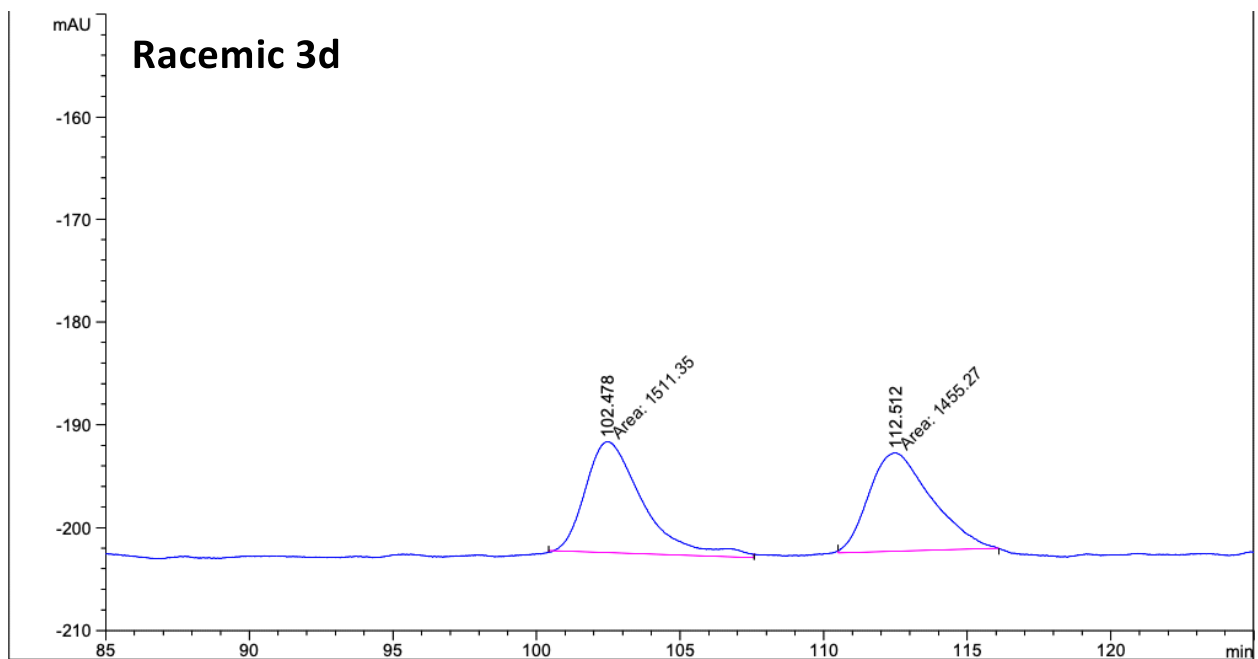

| Peak # | RetTime [min] | Type | Width [min] | Area [mAU*s] | Height [mAU] | Area %  |
|--------|---------------|------|-------------|--------------|--------------|---------|
| 1      | 102.478       | MM   | 2.3328      | 1511.34705   | 10.79779     | 50.9451 |
| 2      | 112.512       | MM   | 2.5297      | 1455.27136   | 9.58785      | 49.0549 |

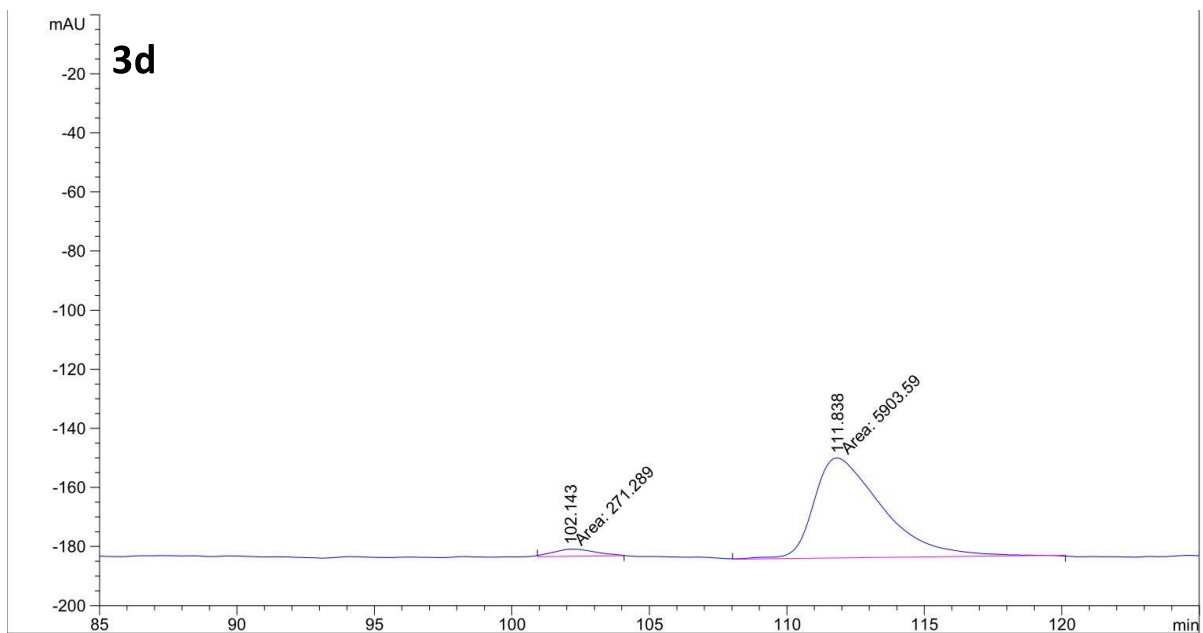

| Peak # | RetTime [min] | Type | Width [min] | Area [mAU*s] | Height [mAU] | Area %  |
|--------|---------------|------|-------------|--------------|--------------|---------|
| 1      | 102.143       | MM   | 1.8183      | 271.28867    | 2.48661      | 4.3934  |
| 2      | 111.838       | MM   | 2.8994      | 5903.59375   | 33.93587     | 95.6066 |

**(S)-1-((6-fluoropyridin-2-yl)amino)-4,4-dimethylhex-5-en-3-ol (3e)**

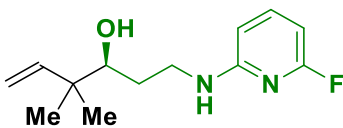

Alcohol **2e** (34.0 mg, 0.2 mmol) was subjected to standard reaction conditions (115 °C, 48 h). Flash column chromatography (SiO<sub>2</sub>: 12:88 EtOAc:hexanes) provided the title compound **3e** as a white solid in 72% yield (34.3 mg, 0.14 mmol, 14:1 rr, 85% ee).

**Separation of regioisomers:** Flash column chromatography (SiO<sub>2</sub>: 6:94 EtOAc:hexanes).

**TLC (SiO<sub>2</sub>):** R<sub>f</sub> = 0.5 (2:3 EtOAc:hexanes).

**<sup>1</sup>H NMR** (500 MHz, CDCl<sub>3</sub>): δ 7.44 (q, J = 8.1 Hz, 1H), 6.19 (dd, J = 8.0, 2.3 Hz, 1H), 6.10 (dd, J = 7.7, 2.2 Hz, 1H), 5.81 (dd, J = 17.5, 10.8 Hz, 1H), 5.10 (dd, J = 10.8, 1.4 Hz, 1H), 5.06 (dd, J = 17.5, 1.4 Hz, 1H), 4.94 (s, 1H), 3.55 (td, J = 14.1, 4.2 Hz, 1H), 3.39 (ddd, J = 11.3, 4.3, 2.1 Hz, 1H), 3.33 (dt, J = 13.0, 5.3 Hz, 1H), 2.36 (d, J = 4.2 Hz, 1H), 1.81 (dddd, J = 14.1, 7.9, 5.9, 1.8 Hz, 1H), 1.52 (ddt, J = 14.1, 11.1, 5.7 Hz, 1H), 1.02 (s, 6H).

**<sup>13</sup>C NMR** (126 MHz, CDCl<sub>3</sub>): δ 163.5 (d, J = 236.6 Hz), 158.4 (d, J = 16.5 Hz), 145.3, 141.7 (d, J = 8.4 Hz), 113.8, 103.1 (d, J = 4.2 Hz), 95.4 (d, J = 36.4 Hz), 76.5, 41.6, 40.3, 31.2, 23.2, 22.1.

**<sup>19</sup>F NMR** (471 MHz, CDCl<sub>3</sub>): δ -70.01.

**HRMS** (Na<sup>+</sup>, *m/z*) for C<sub>13</sub>H<sub>19</sub>FN<sub>2</sub>O: calcd. = 261.1374; found = 261.1371.

**FTIR** (neat): 3054, 2957, 1661, 1572, 1510, 1307, 1113, 899, 778 cm<sup>-1</sup>.

**HPLC:** (Chiralcel columns Amylose 3-2, Hexane:2-PrOH = 99:01, 0.5 mL/min, 210 nm).

**[α]<sub>D</sub><sup>24</sup>** = -14.5 (c = 0.1, CHCl<sub>3</sub>).

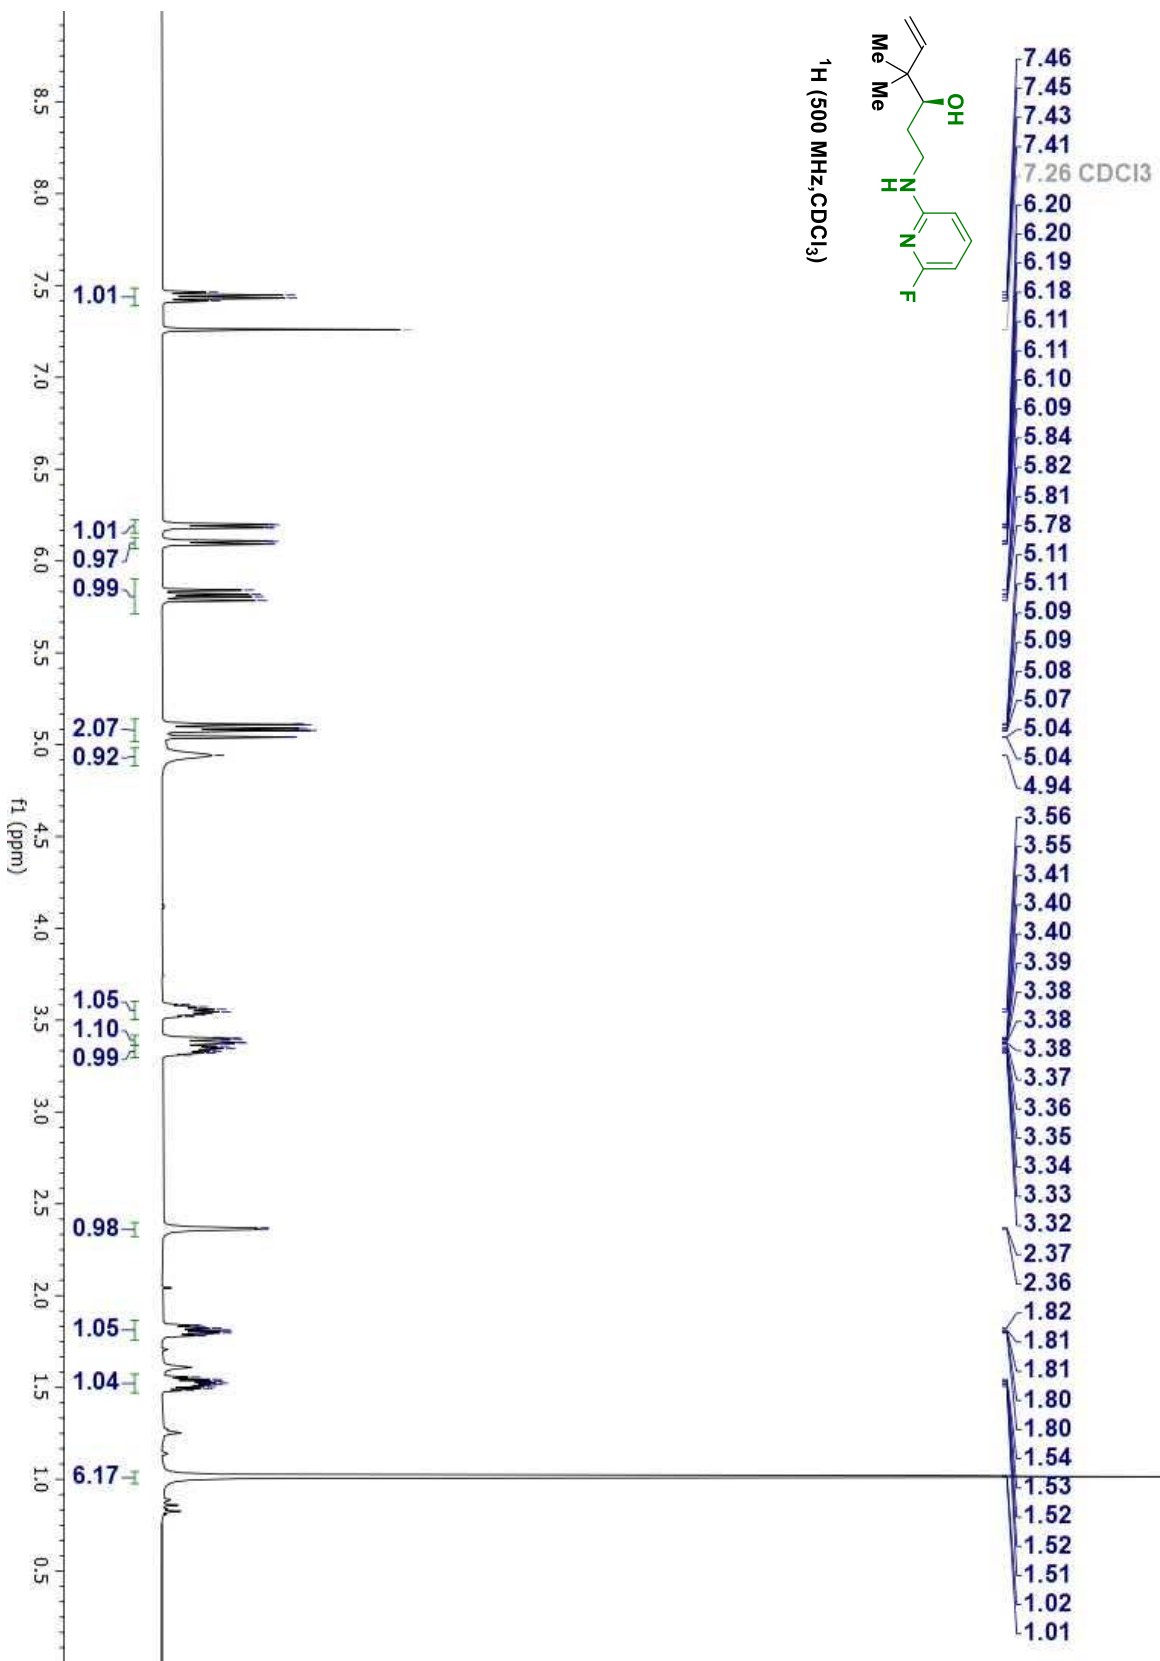

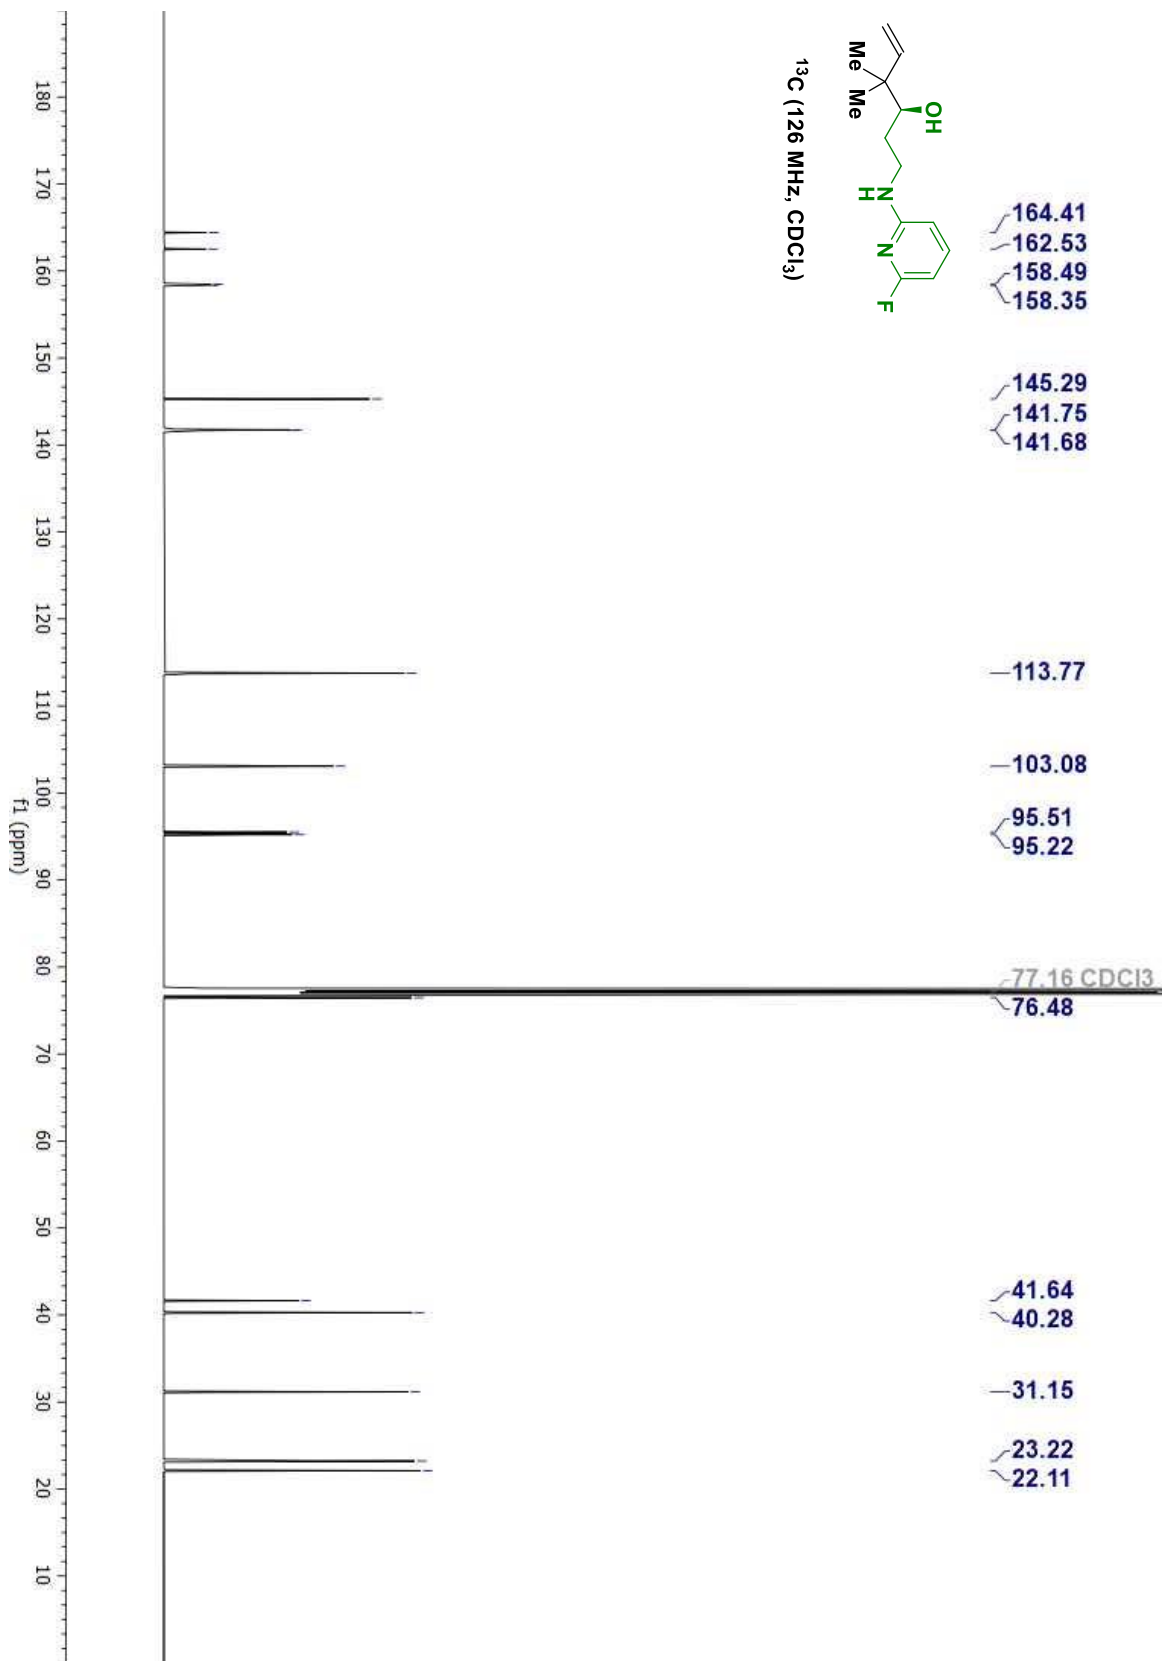

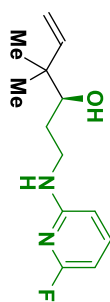

<sup>19</sup>F (471 MHz, CDCl<sub>3</sub>)

-70.01

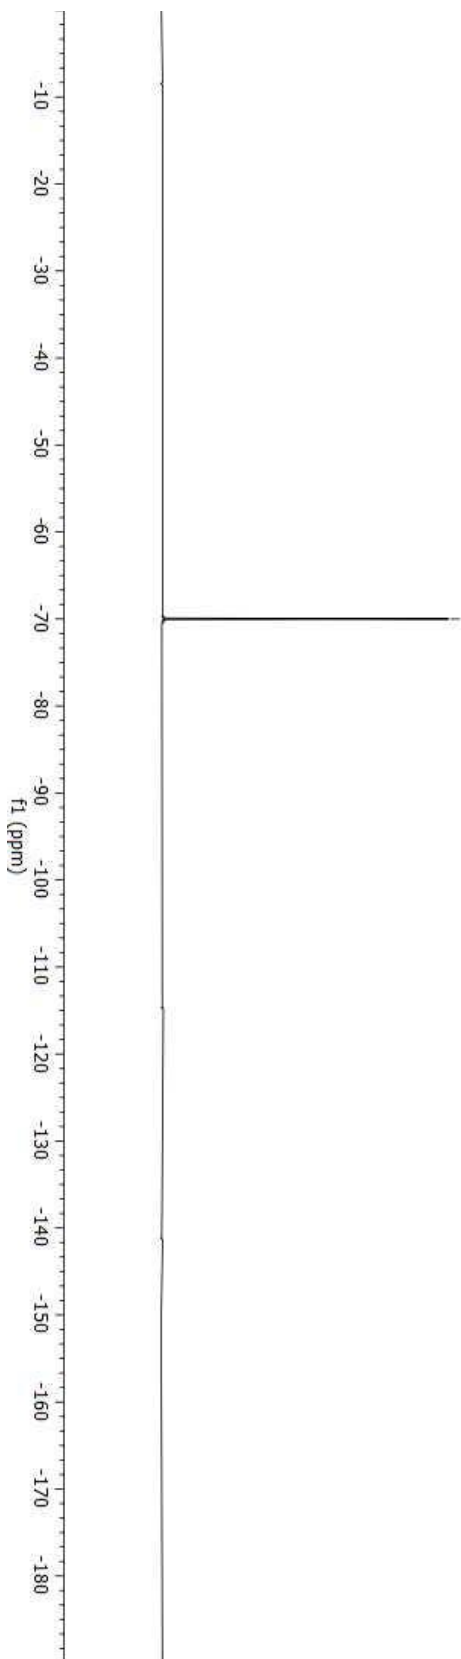

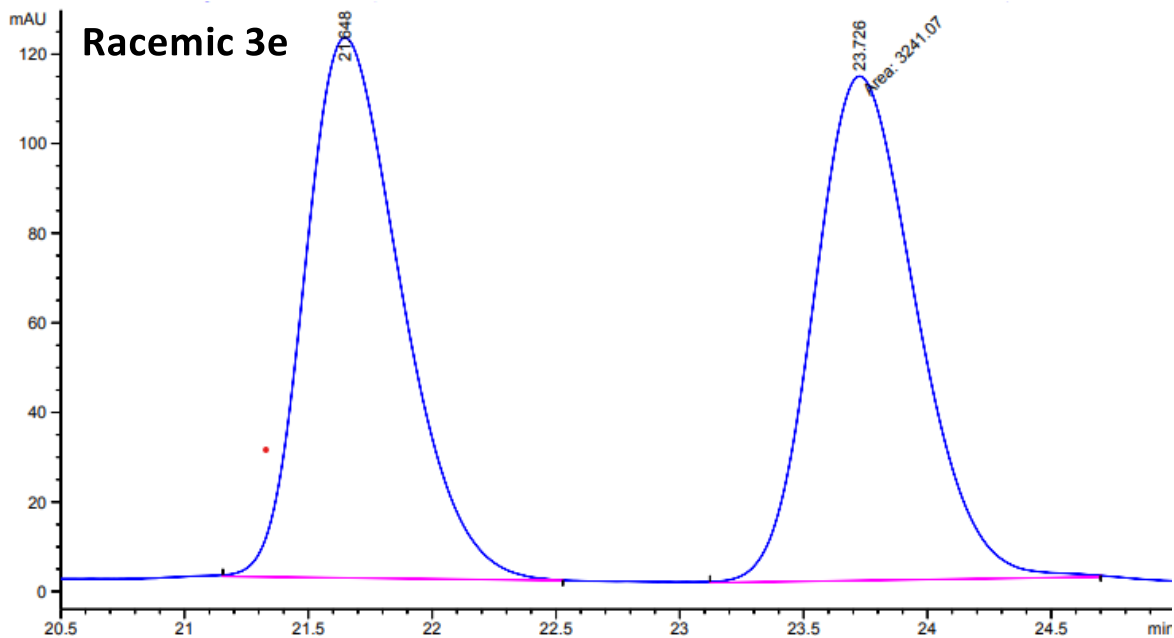

| Peak # | RetTime [min] | Type | Width [min] | Area [mAU*s] | Height [mAU] | Area %  |
|--------|---------------|------|-------------|--------------|--------------|---------|
| 1      | 21.648        | BB   | 0.4192      | 3260.17944   | 120.67209    | 50.1470 |
| 2      | 23.726        | MM   | 0.4795      | 3241.06958   | 112.64754    | 49.8530 |

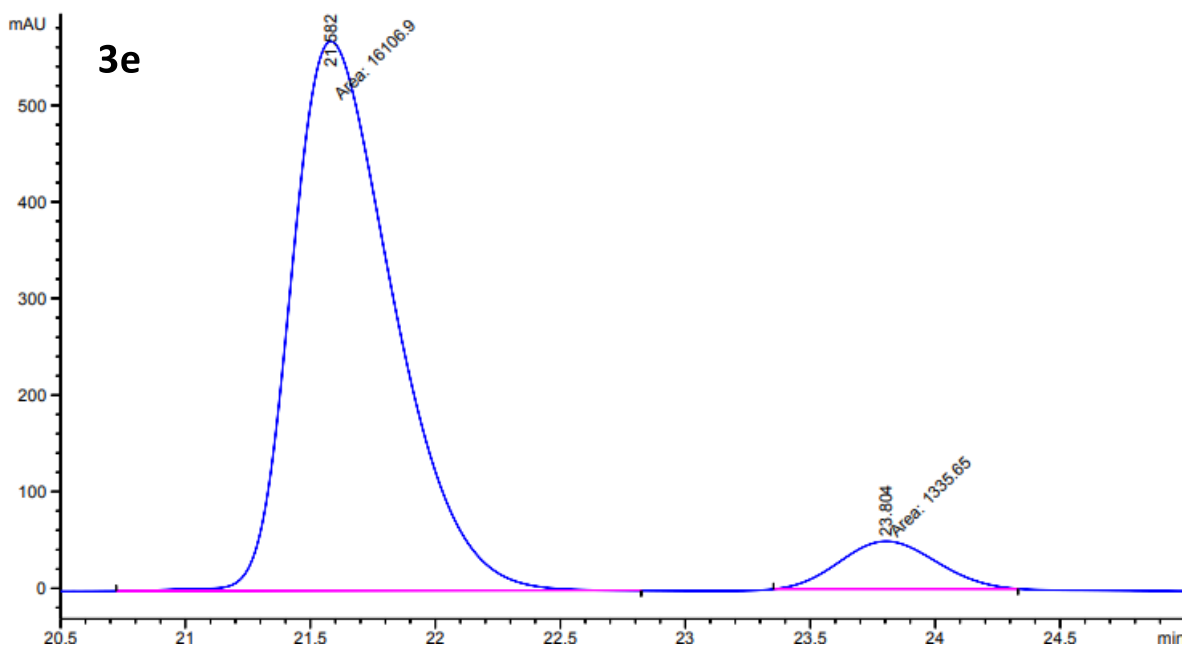

| Peak # | RetTime [min] | Type | Width [min] | Area [mAU*s] | Height [mAU] | Area %  |
|--------|---------------|------|-------------|--------------|--------------|---------|
| 1      | 21.582        | MM   | 0.4717      | 1.61069e4    | 569.14410    | 92.3426 |
| 2      | 23.804        | MM   | 0.4497      | 1335.65039   | 49.50010     | 7.6574  |

**(S)-1-(3,5-dimethyl-1H-pyrazol-1-yl)-4,4-dimethylhex-5-en-3-ol (3f)**

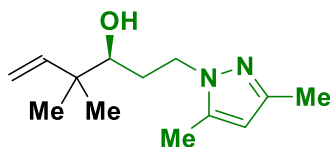

Alcohol **2f** (30.8 mg, 0.2 mmol) was subjected to standard reaction conditions (115 °C, 48 h). Flash column chromatography (SiO<sub>2</sub>: 25:75 EtOAc:hexanes) provided the title compound **3f** as a pale yellow solid in 76% yield (33.8 mg, 0.15 mmol, 16:1 rr, 86% ee).

**Separation of regioisomers:** Flash column chromatography (SiO<sub>2</sub>: 10:90 Acetone:cyclohexane).

**TLC (SiO<sub>2</sub>):** R<sub>f</sub> = 0.2 (1:2 EtOAc:hexanes).

**<sup>1</sup>H NMR** (400 MHz, CDCl<sub>3</sub>): δ 5.90 – 5.79 (m, 1H), 5.78 (s, 1H), 5.12 – 4.94 (m, 2H), 4.21 – 4.04 (m, 2H), 3.24 (dd, J = 10.7, 2.1 Hz, 1H), 2.23 (s, 3H), 2.21 (s, 3H), 2.02 (dddd, J = 14.7, 8.5, 6.6, 1.9 Hz, 1H), 1.65 (ddt, J = 13.8, 11.1, 5.7 Hz, 1H), 1.01 (s, 6H).

**<sup>13</sup>C NMR** (101 MHz, CDCl<sub>3</sub>): δ 145.4, 113.2, 105.1, 89.9, 77.4, 75.8, 46.5, 41.5, 32.0, 22.9, 22.7, 13.5, 11.1.

**HRMS** (H<sup>+</sup>, *m/z*) for C<sub>13</sub>H<sub>22</sub>N<sub>2</sub>O: calcd. = 228.1703; found = 228.1707

**FTIR** (neat): 3264, 2928, 2843, 1524, 1424, 1368, 1233 cm<sup>-1</sup>, 954, 924, 768 cm<sup>-1</sup>.

**HPLC:** (Chiralcel columns Cellulose 5, Hexane:2-PrOH = 96:04, 0.5 mL/min, 210 nm).

**[α]<sub>D</sub><sup>24</sup>** = -46.2 (c = 0.1, CHCl<sub>3</sub>).

**Melting Point:** 67-69 °C.

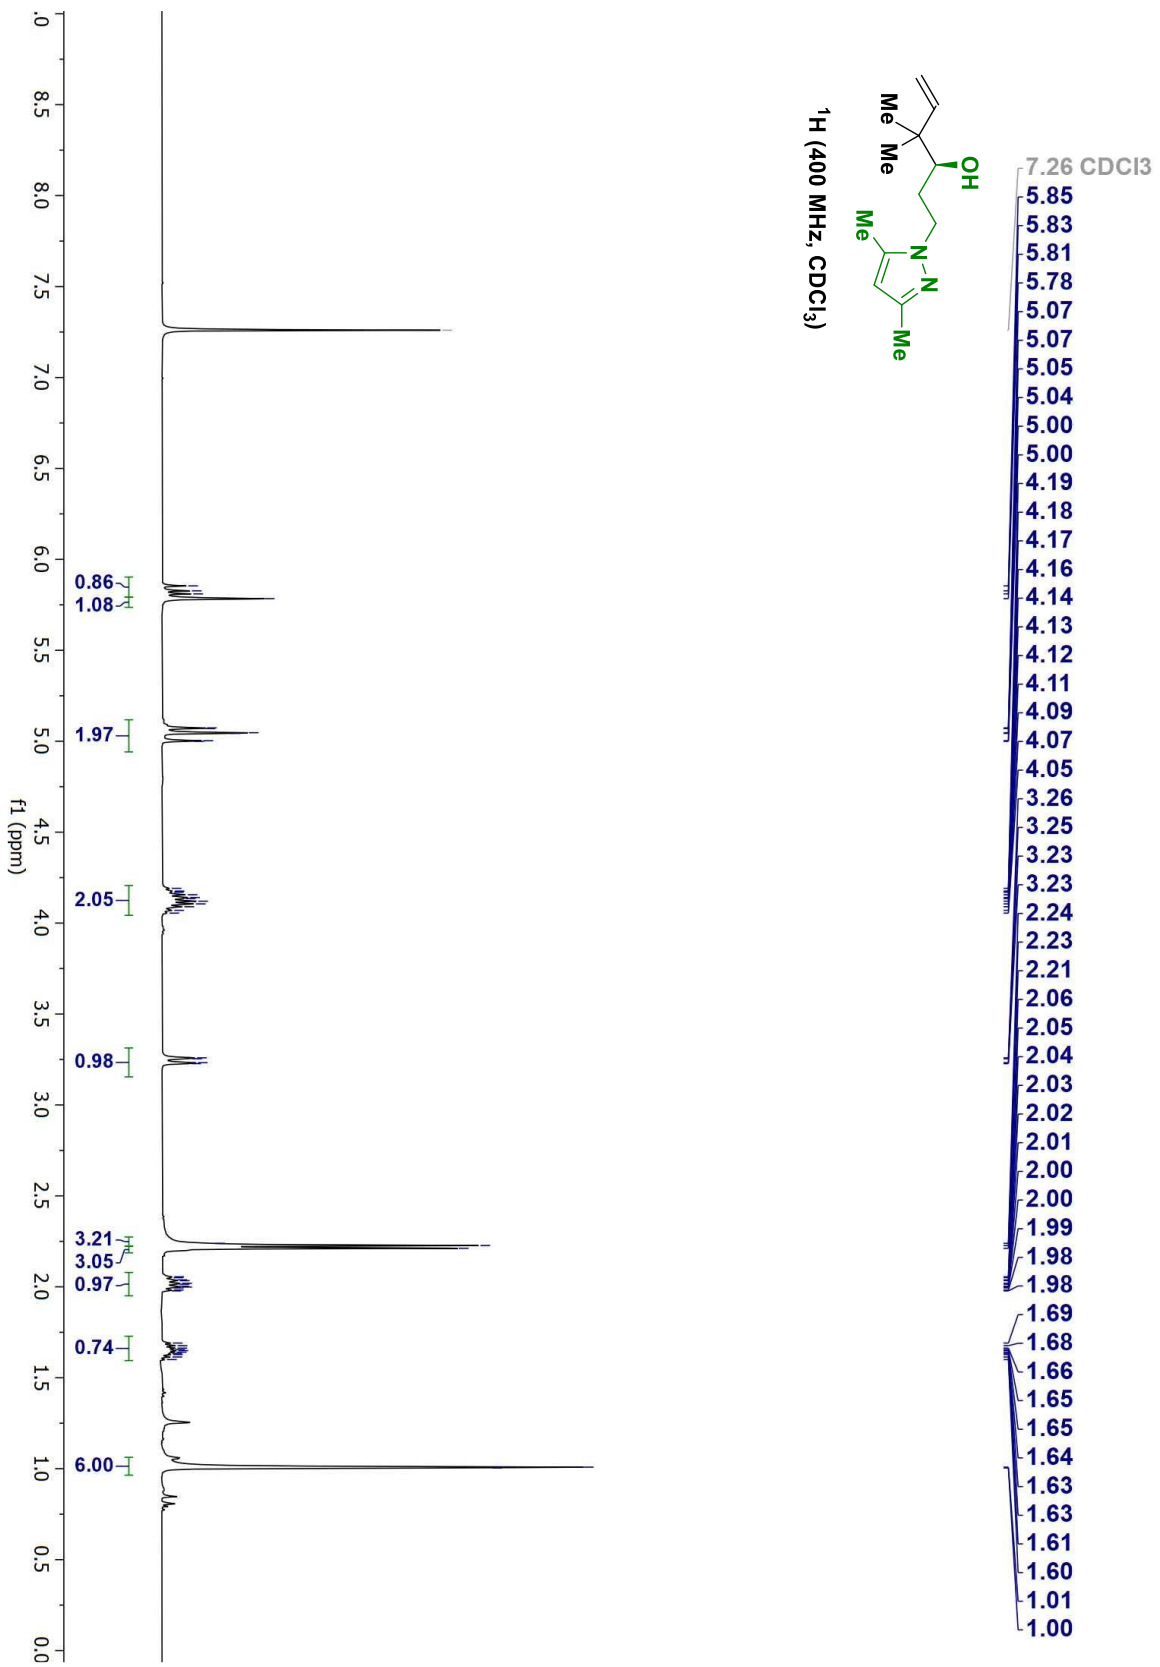



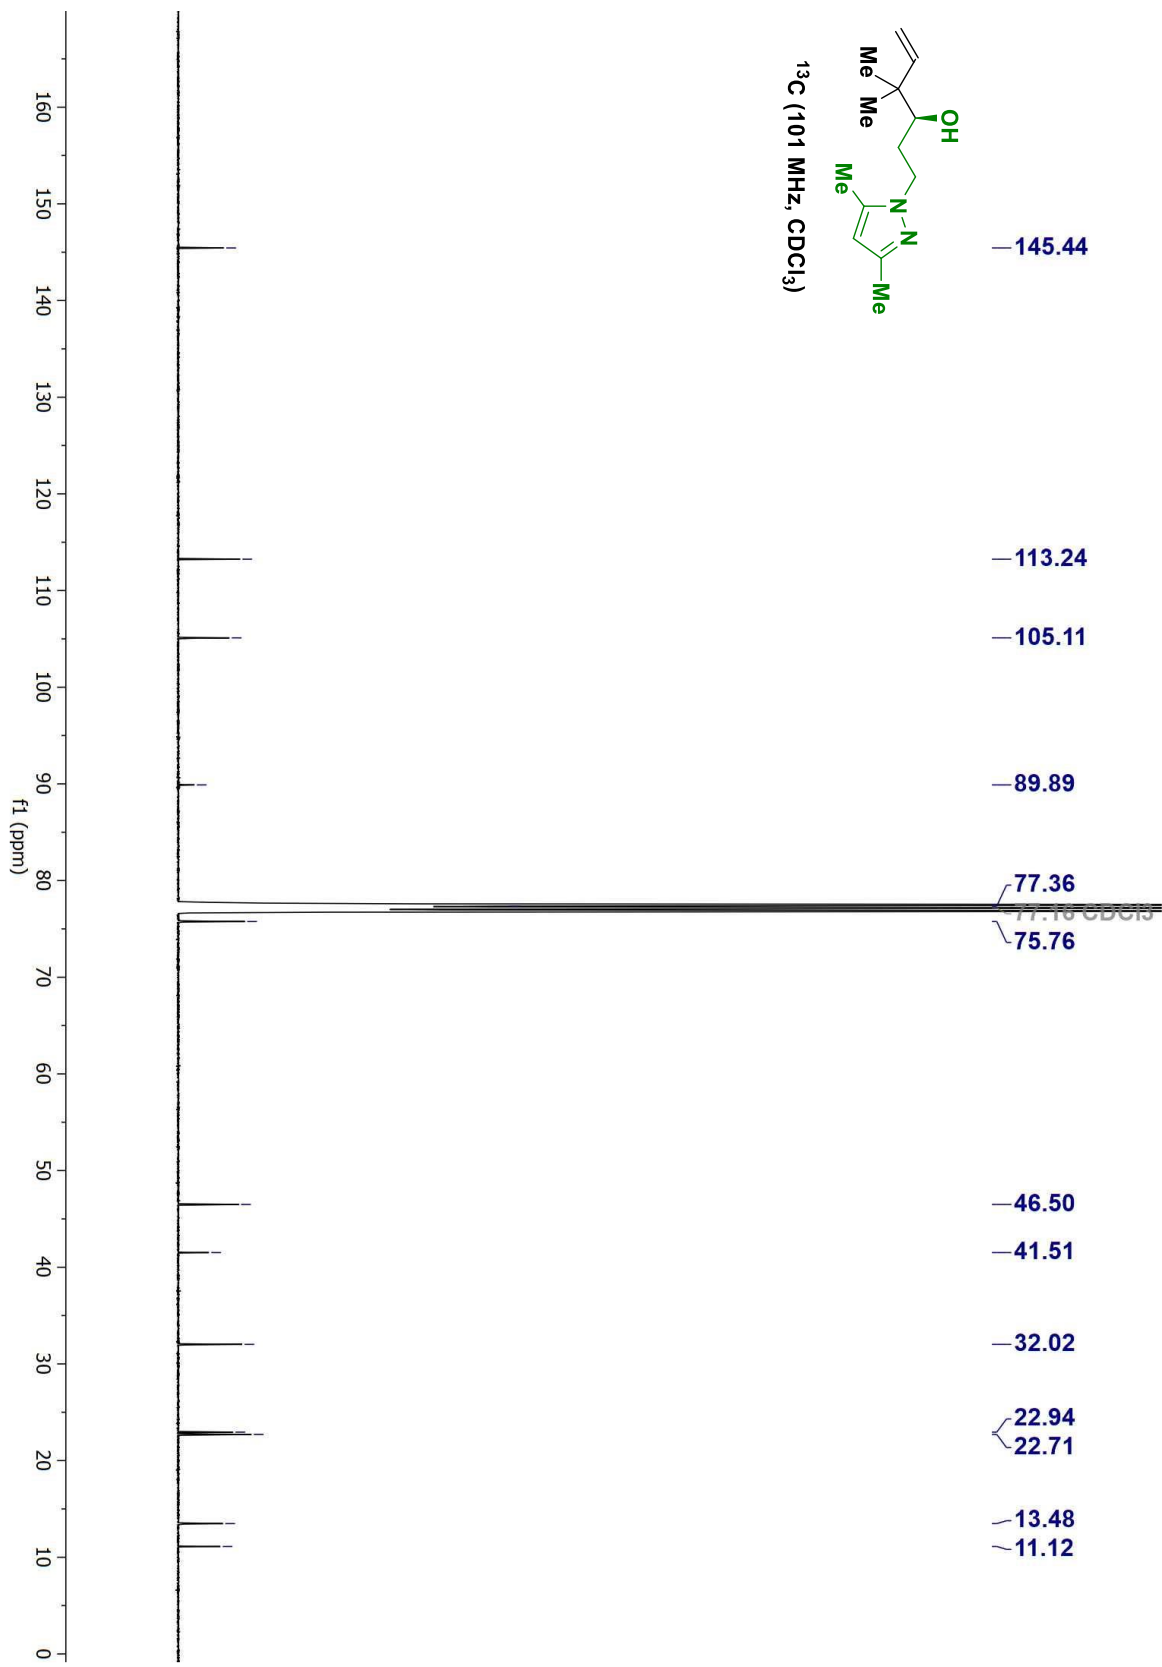

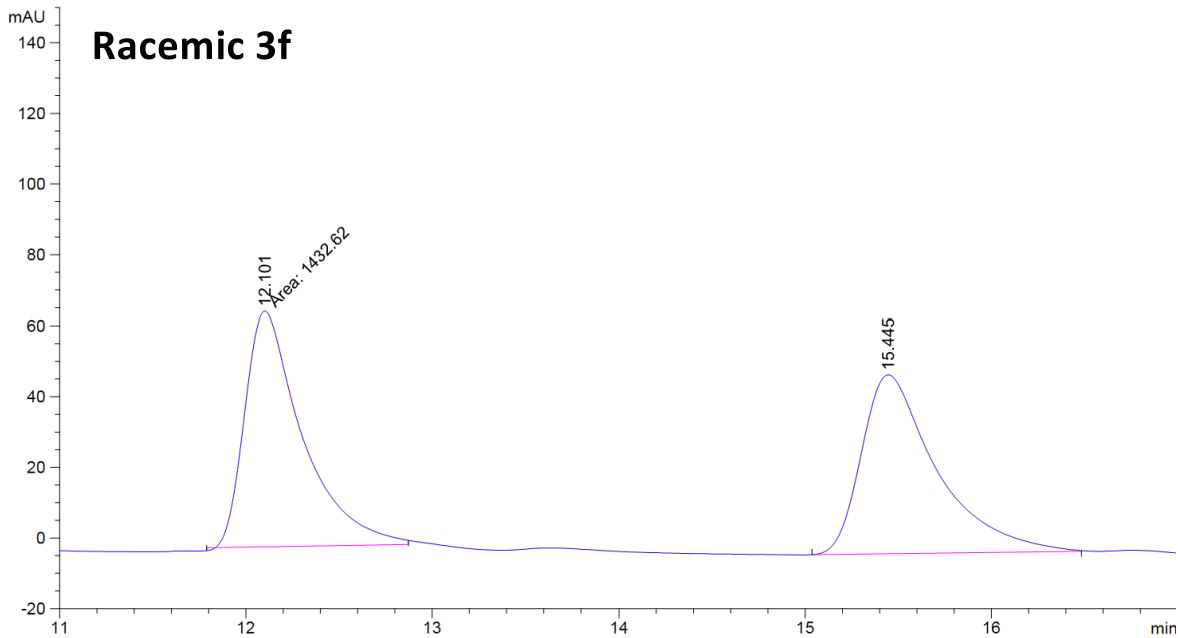

| Peak # | RetTime [min] | Type | Width [min] | Area [mAU*s] | Height [mAU] | Area %  |
|--------|---------------|------|-------------|--------------|--------------|---------|
| 1      | 12.101        | MM   | 0.3586      | 1432.62268   | 66.57875     | 50.2468 |
| 2      | 15.445        | BB   | 0.4087      | 1418.55054   | 50.66459     | 49.7532 |

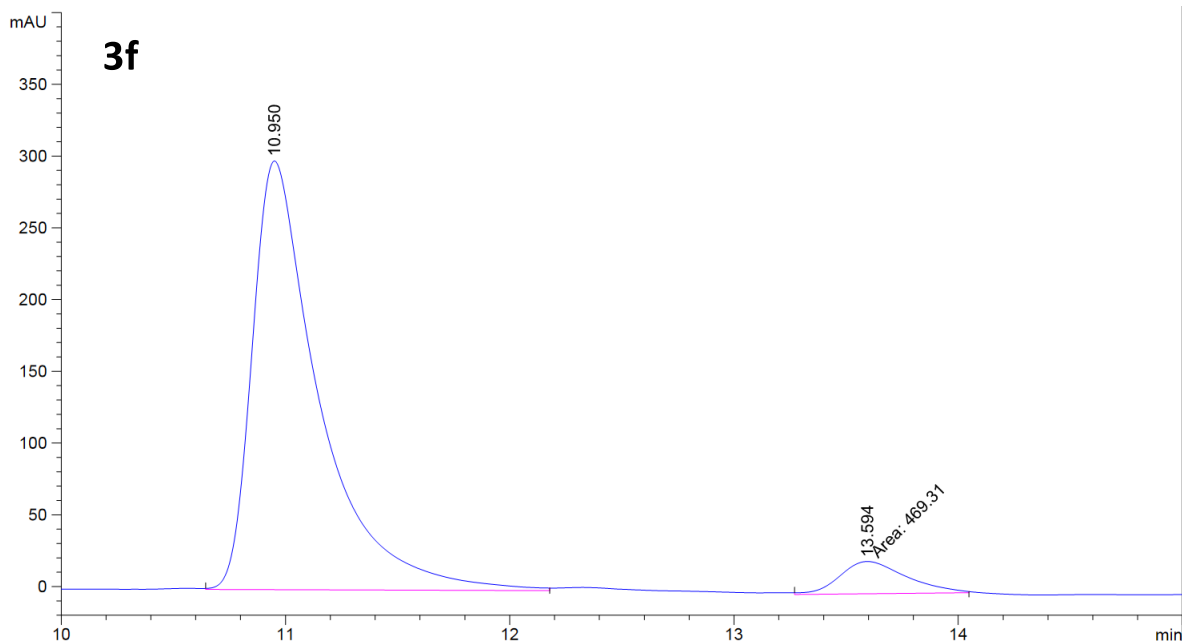

| Peak # | RetTime [min] | Type | Width [min] | Area [mAU*s] | Height [mAU] | Area %  |
|--------|---------------|------|-------------|--------------|--------------|---------|
| 1      | 10.950        | BB   | 0.2991      | 6227.99707   | 298.86868    | 92.9926 |
| 2      | 13.594        | MM   | 0.3460      | 469.30966    | 22.60351     | 7.0074  |

**(S)-1-(4-bromophenyl)-3,3-dimethylpent-4-en-2-ol (3g)**

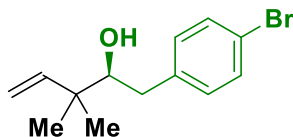

Alcohol **2g** (40.2 mg, 0.2 mmol) was subjected to standard reaction conditions (115 °C, 48 h). Flash column chromatography (SiO<sub>2</sub>: 1:99 EtOAc:hexanes) provided the title compound **3g** as a clear oil in 70% yield (37.8 mg, 0.14 mmol, 12:1 rr, 88% ee).

**Separation of regioisomers:** Flash column chromatography (SiO<sub>2</sub>: 1:99 Acetone:pentane).

**TLC (SiO<sub>2</sub>):** R<sub>f</sub> = 0.45 (1:9 EtOAc:hexanes).

**<sup>1</sup>H NMR** (400 MHz, CDCl<sub>3</sub>): δ 7.42 (d, J = 8.2 Hz 2H), 7.11 (d, J = 8.2 Hz, 2H), 5.90 (dd, J = 17.5, 10.9 Hz, 1H), 5.24-5.04 (m, 2H), 3.46 (ddd, J = 10.6, 3.9, 2.0 Hz, 1H), 2.82 (dd, J = 13.8, 2.0 Hz, 1H), 2.43 (dd J = 13.8, 10.6 Hz, 1H), 1.51 (d, J = 3.9 Hz, 1H), 1.10 (s, 6H)

**<sup>13</sup>C NMR** (101 MHz, CDCl<sub>3</sub>): δ 145.1, 139.1, 131.6, 131.2, 120.3, 113.7, 79.3, 41.7, 37.8, 23.0, 22.6.

**HRMS** (Na<sup>+</sup>, *m/z*) for C<sub>13</sub>H<sub>17</sub>BrO: calcd. = 291.0263; found = 291.0355.

**FTIR** (neat): 3047, 2965, 2928, 2872, 1711, 1665, 1595, 1526, 1481 cm<sup>-1</sup>.

**HPLC:** (Chiralcel columns Chiralcel column Amylose 3, Hexane:2-PrOH = 98:02, 0.5 mL/min, 210 nm).

$[\alpha]_D^{24} = -18$  (c = 0.1, CHCl<sub>3</sub>).

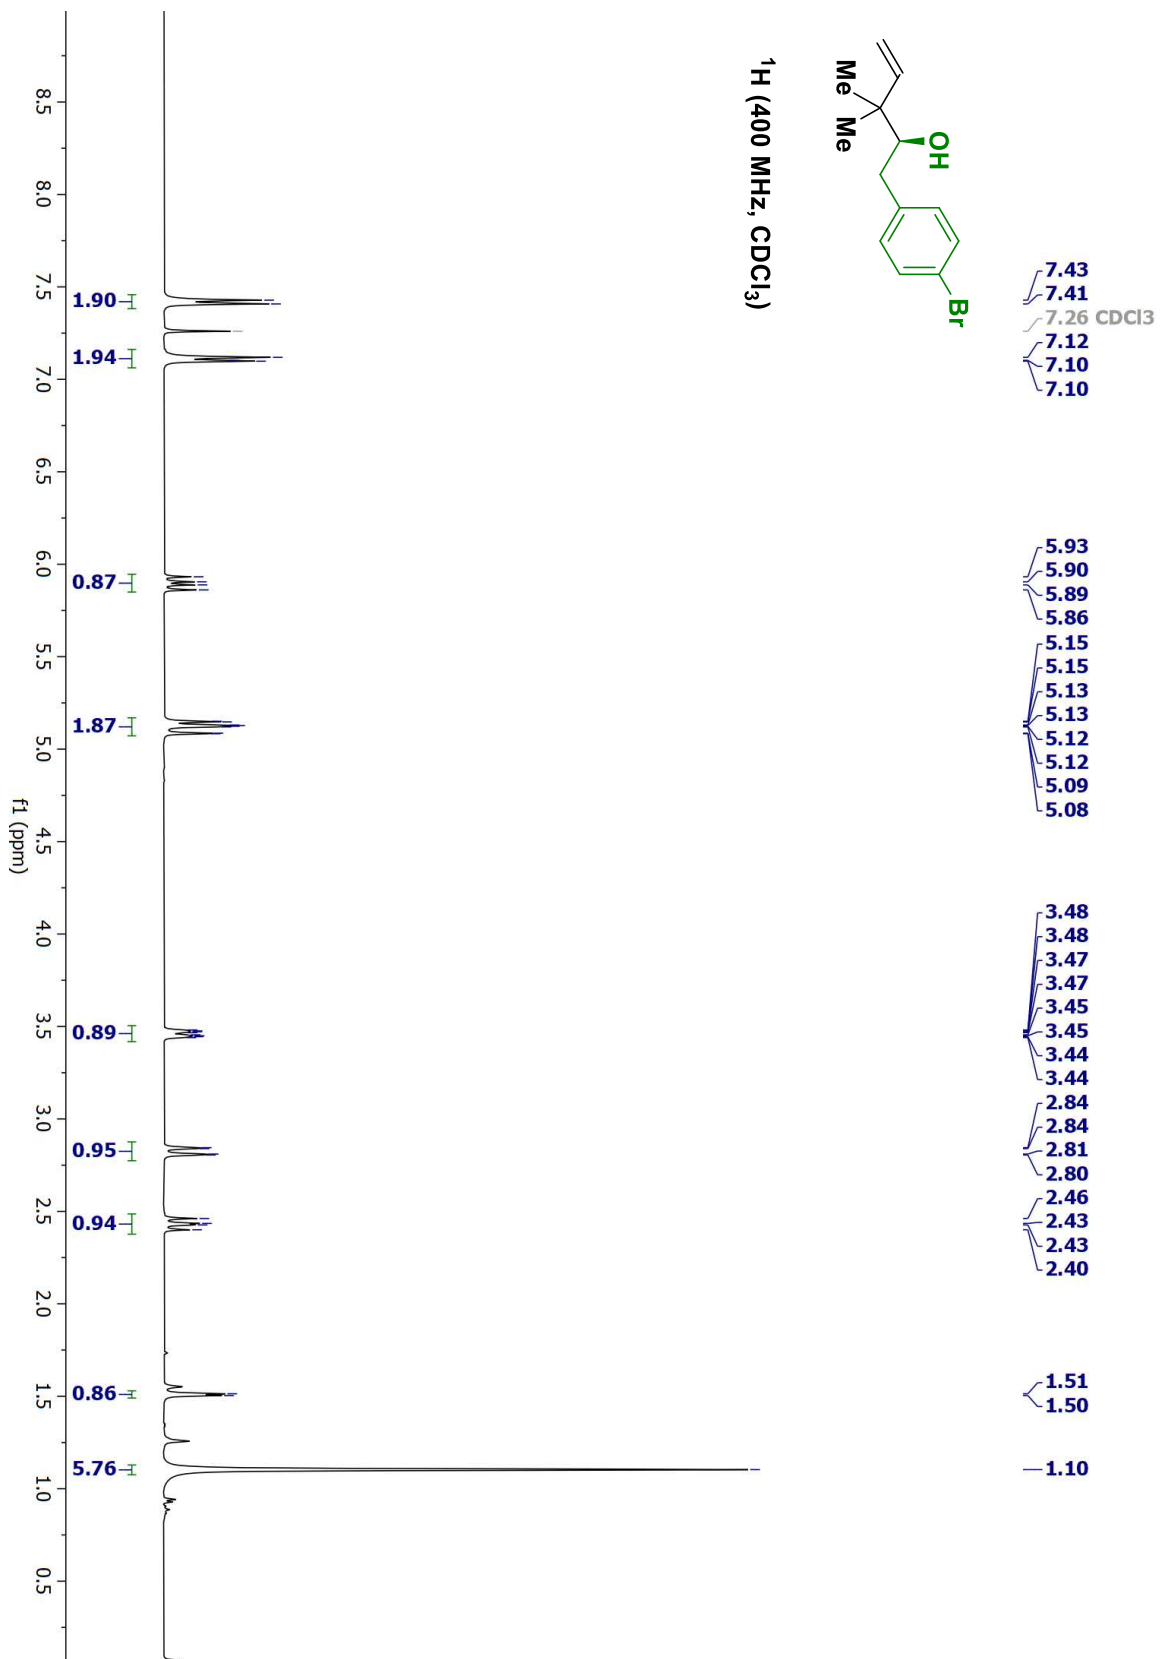

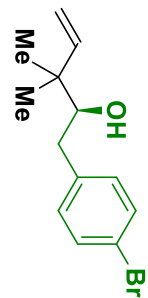

$^{13}\text{C}$  (101 MHz,  $\text{CDCl}_3$ )

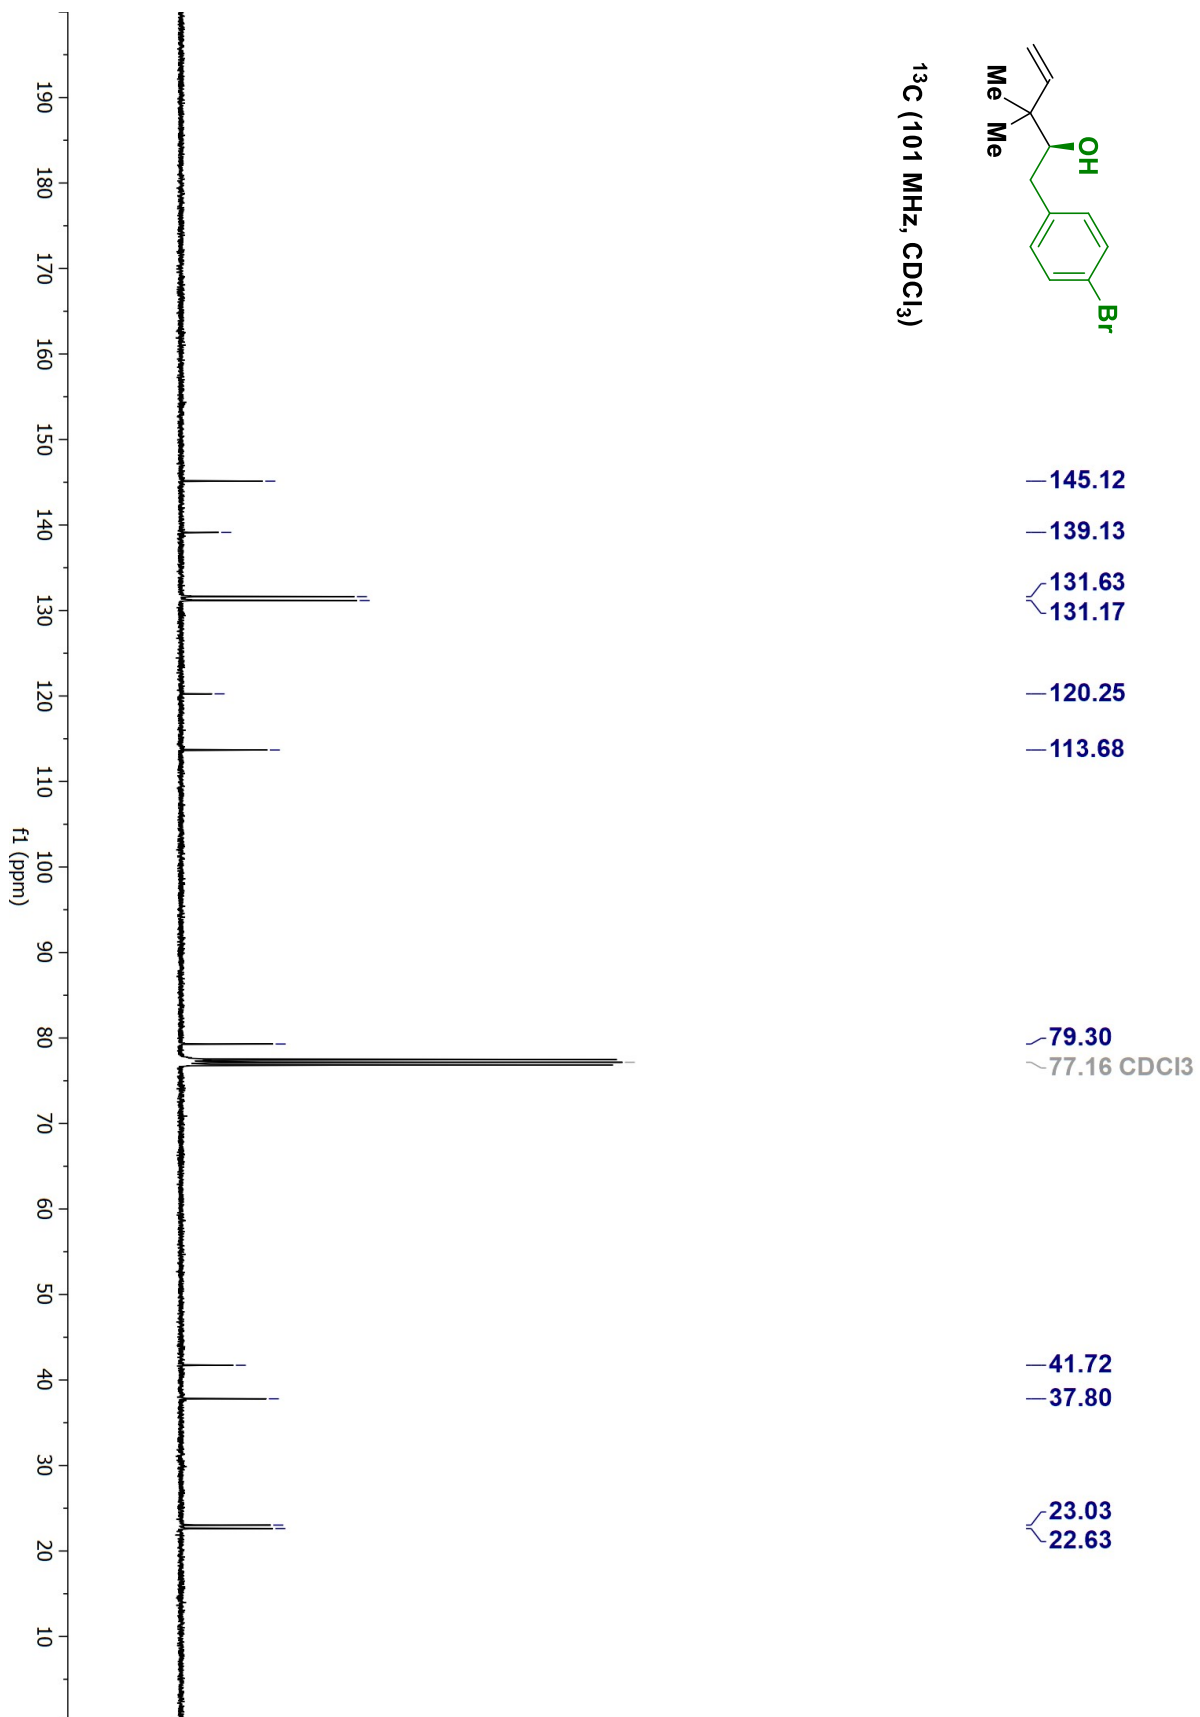

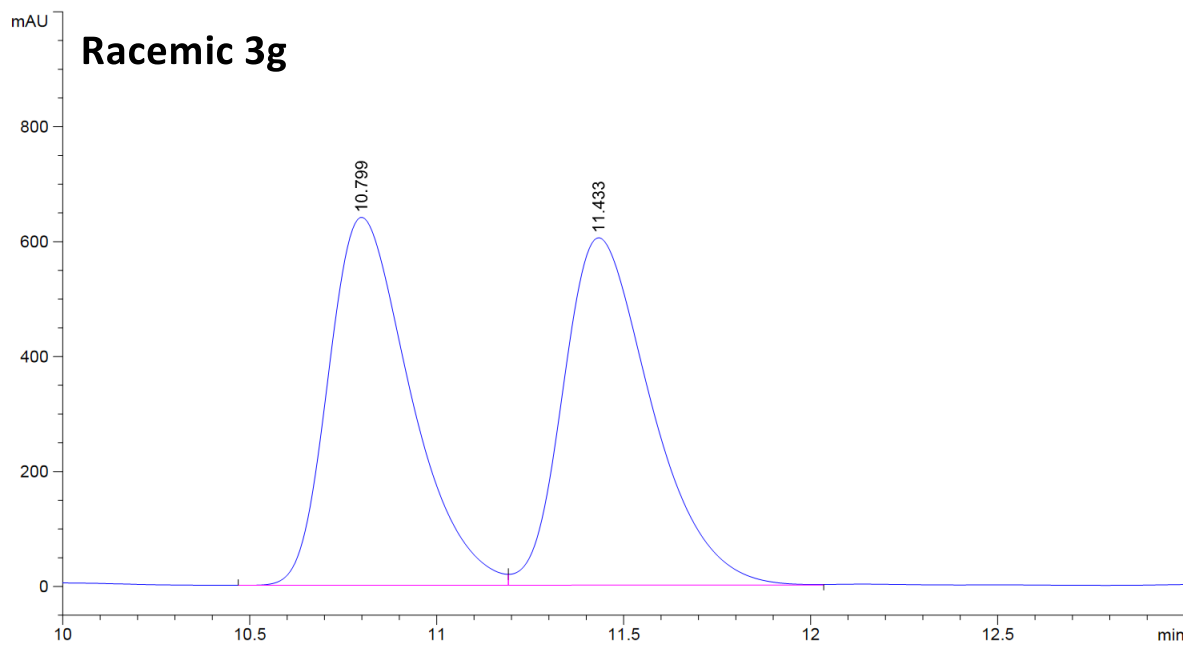

| Peak # | RetTime [min] | Type | Width [min] | Area [mAU*s] | Height [mAU] | Area %  |
|--------|---------------|------|-------------|--------------|--------------|---------|
| 1      | 10.799        | VV   | 0.2339      | 9763.81836   | 640.45917    | 49.6333 |
| 2      | 11.433        | VB   | 0.2512      | 9908.09766   | 604.66211    | 50.3667 |

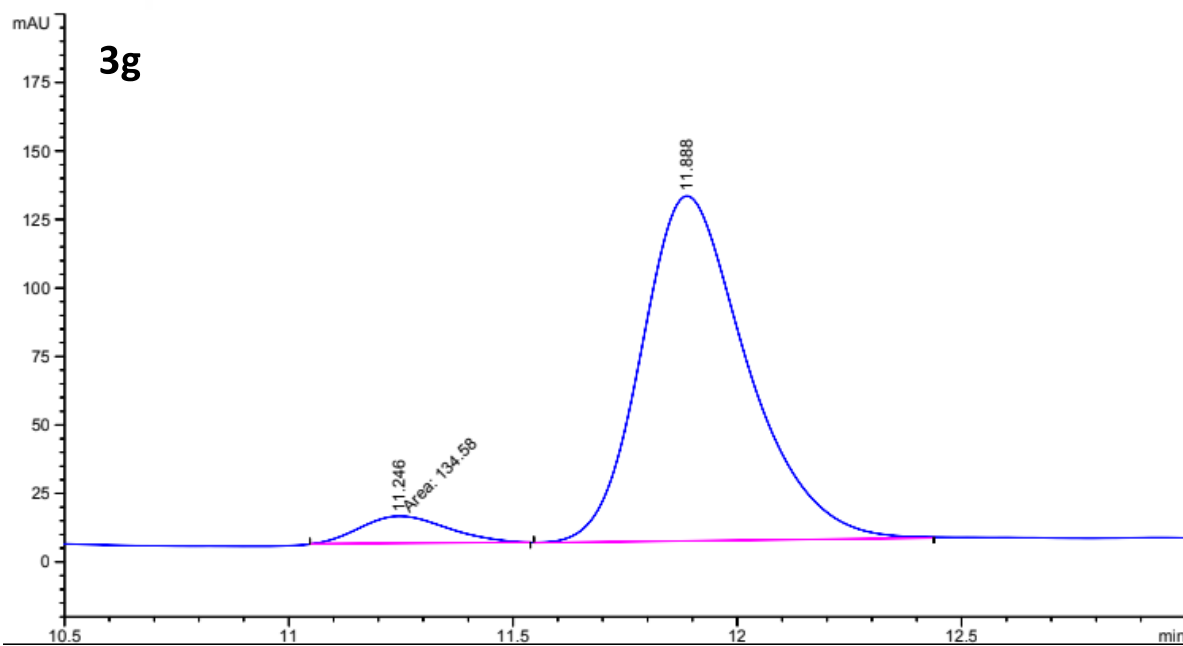

| Peak # | RetTime [min] | Type | Width [min] | Area [mAU*s] | Height [mAU] | Area %  |
|--------|---------------|------|-------------|--------------|--------------|---------|
| 1      | 11.246        | MM   | 0.2254      | 134.58035    | 9.95323      | 6.1261  |
| 2      | 11.888        | VB   | 0.2490      | 2062.24829   | 125.95834    | 93.8739 |

**(S)-1-(1H-indol-3-yl)-3,3-dimethylpent-4-en-2-ol (3h)**

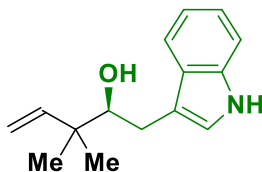

Alcohol **2h** (32.2 mg, 0.2 mmol) was subjected to standard reaction conditions (115 °C, 48 h). Flash column chromatography (SiO<sub>2</sub>: 10:90 EtOAc:hexanes) provided the title compound **3h** as a yellow oil in 82% yield (37.6 mg, 0.16 mmol, 12:1 rr, 92% ee).

**Separation of regioisomers:** Flash column chromatography (SiO<sub>2</sub>: 5:95 EtOAc:hexanes).

**TLC (SiO<sub>2</sub>):** R<sub>f</sub> = 0.4 (1:3 EtOAc:hexanes).

**<sup>1</sup>H NMR** (400 MHz, CDCl<sub>3</sub>): δ 8.02 (s, 1H), 7.60 (d, J = 7.8 Hz, 1H), 7.37 (d, J = 8.2 Hz, 1H), 7.21 (t, J = 7.8 Hz, 1H), 7.17 – 7.08 (m, 2H), 6.02 (dd, J = 18.0, 10.4 Hz, 1H), 5.18 – 5.08 (m, 2H), 3.64 (dd, J = 10.8, 2.0 Hz, 1H), 3.08 (dd, J = 14.7, 2.0 Hz, 1H), 2.63 (dd, J = 14.7, 10.8 Hz, 1H), 1.69 (s, 1H), 1.17 (s, 6H).

**<sup>13</sup>C NMR** (101 MHz, CDCl<sub>3</sub>): δ 145.5, 136.7, 127.6, 122.8, 122.4, 119.6, 119.0, 113.5, 112.9, 111.4, 77.9, 41.4, 28.2, 23.2, 23.0.

**HRMS** (Na<sup>+</sup>, *m/z*) for C<sub>15</sub>H<sub>19</sub>NO: calcd. = 252.1398; found = 252.1563.

**FTIR** (neat): 3384, 2927, 2869, 1627, 1442, 1411, 1384, 1233, 1210, 1078, 1015 cm<sup>-1</sup>.

**HPLC:** (Chiralcel column Amylose 3, Hexane:2-PrOH = 99:01, 0.5 mL/min, 210 nm).

**[α]<sub>D</sub><sup>24</sup>** = -34.6 (c = 0.1, CHCl<sub>3</sub>).

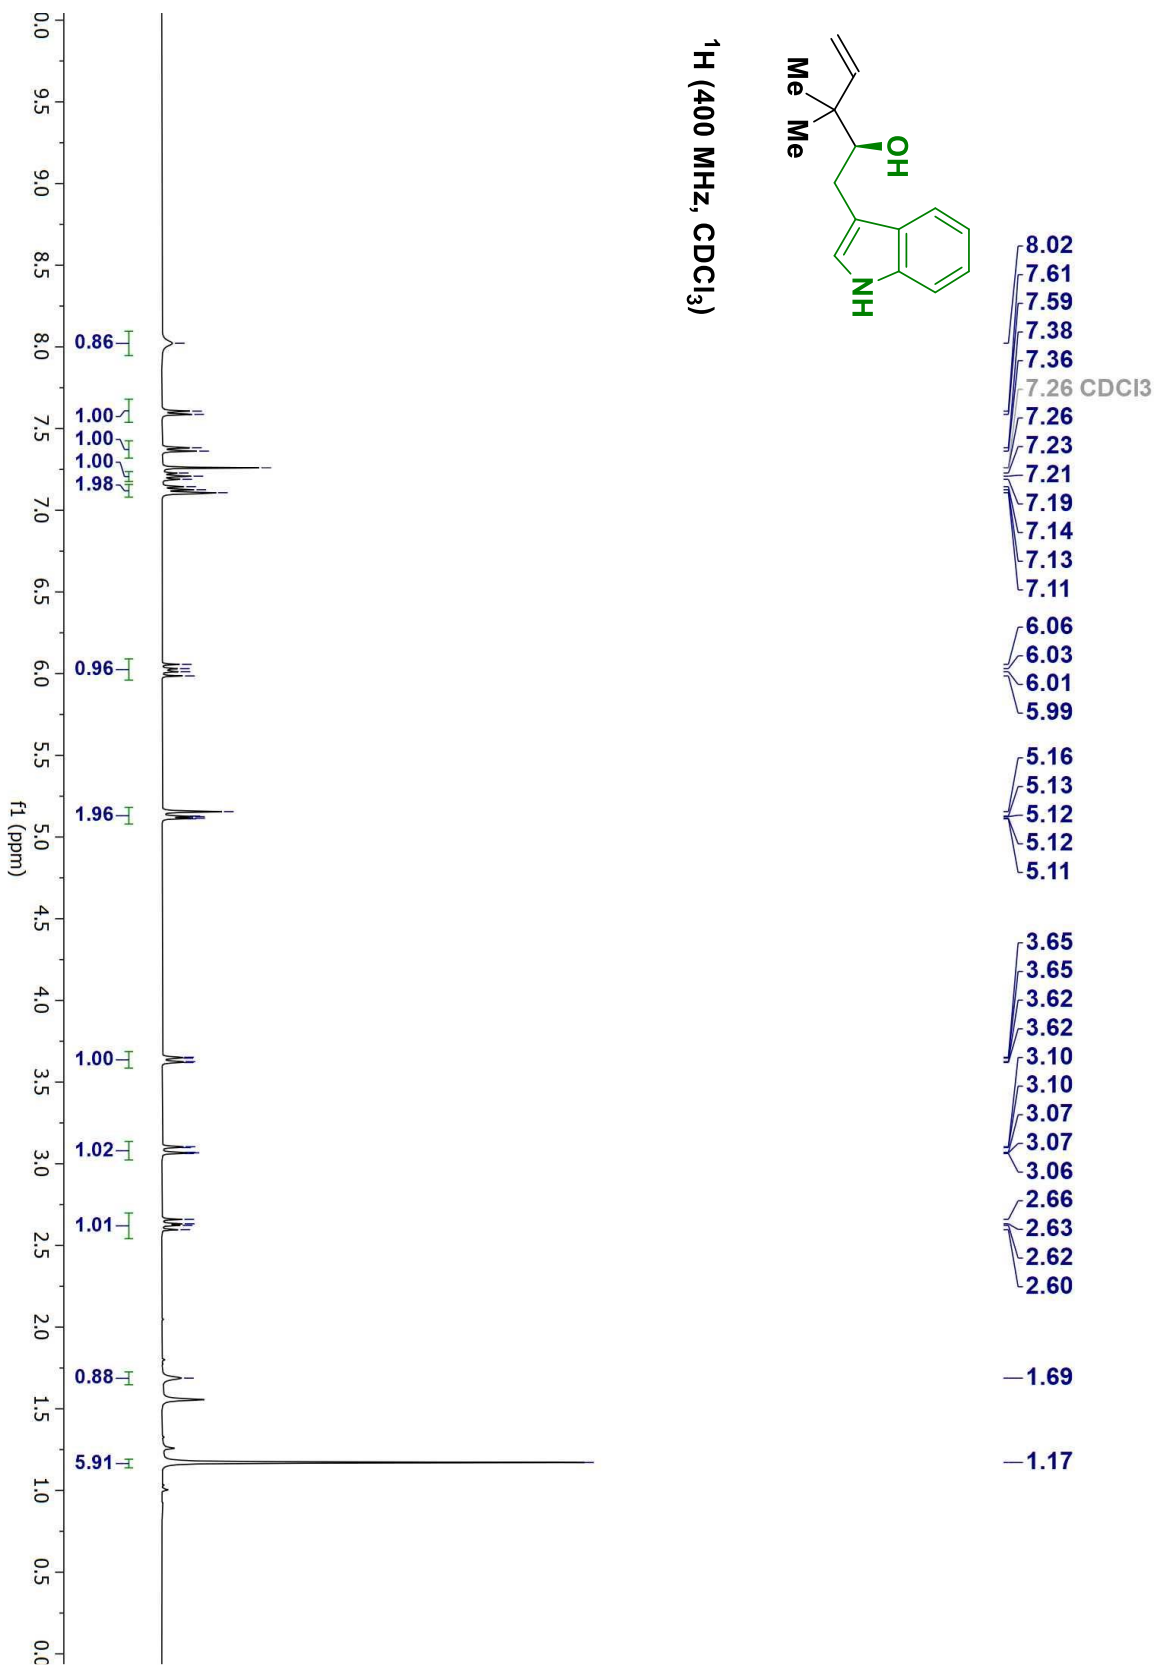



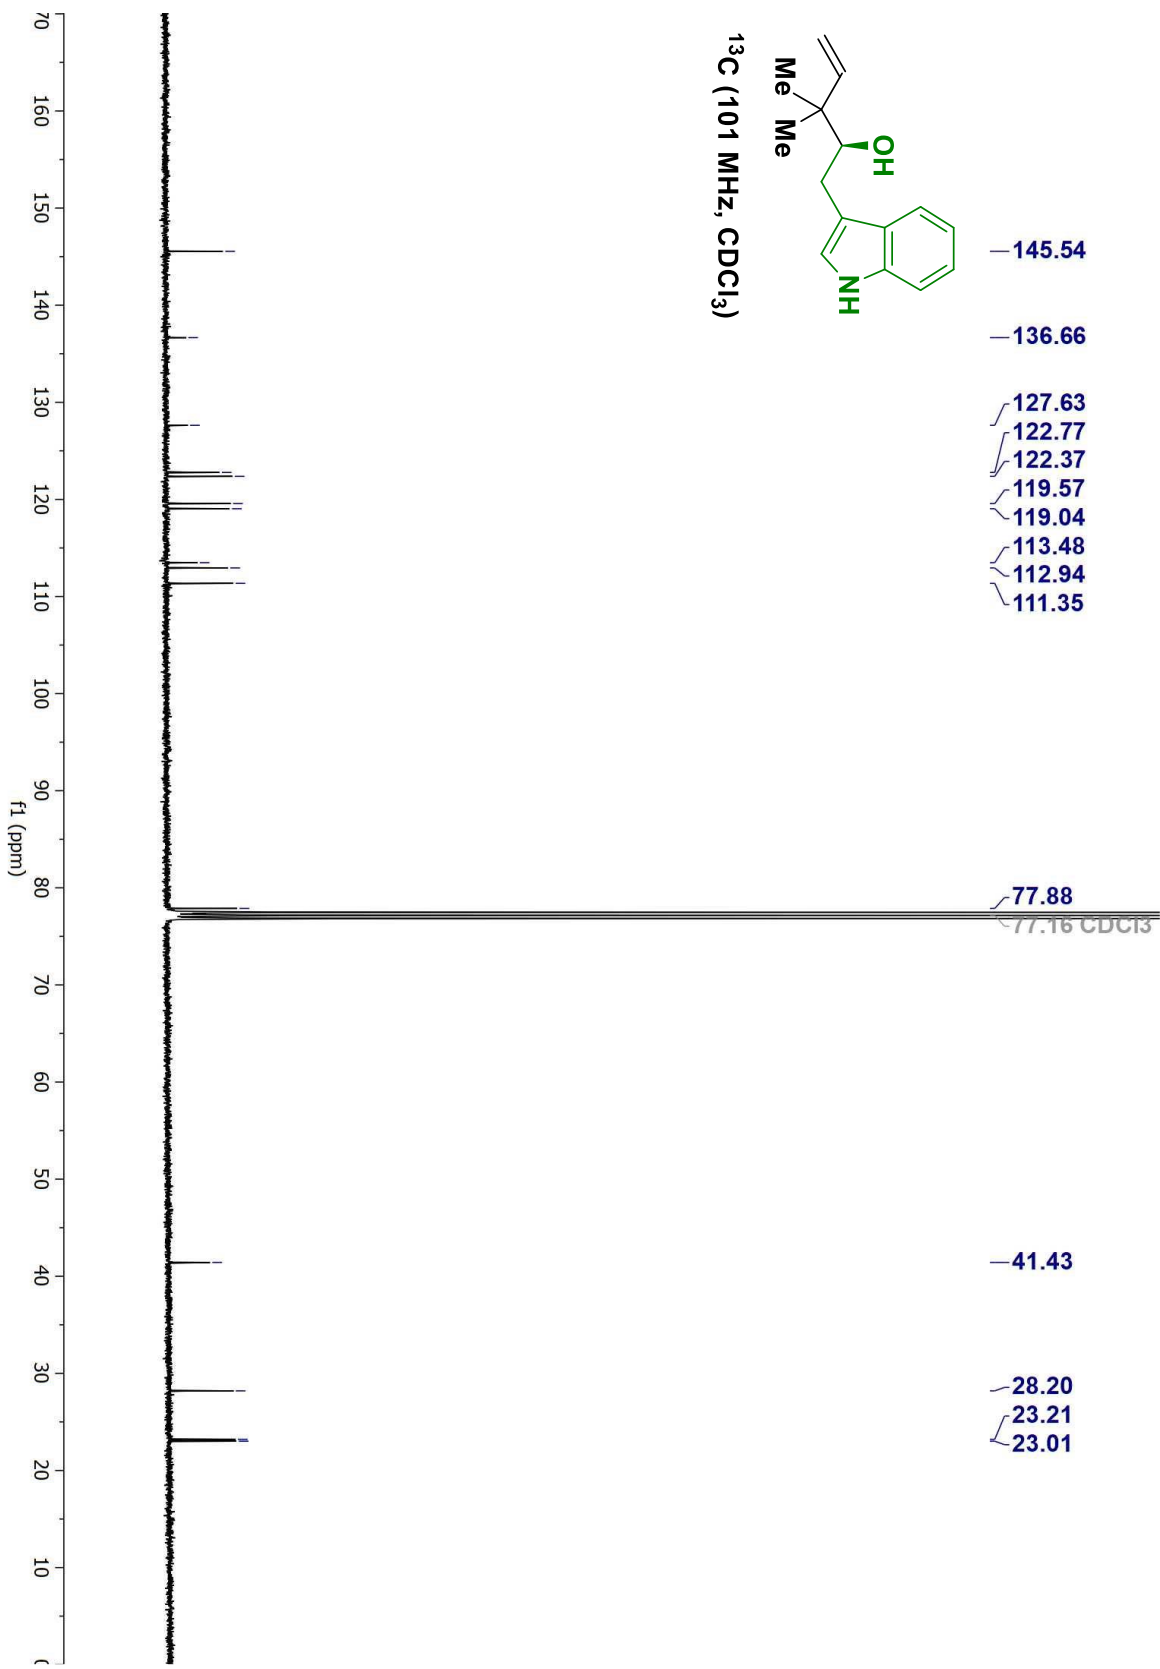

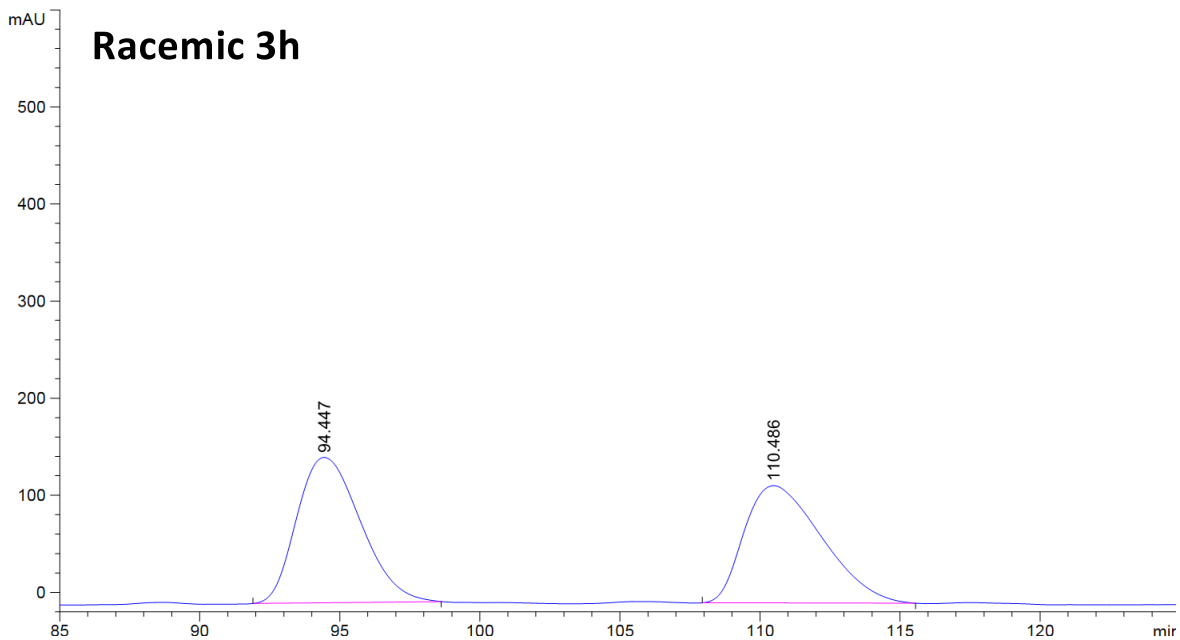

| Peak # | RetTime [min] | Type | Width [min] | Area [mAU*s] | Height [mAU] | Area %  |
|--------|---------------|------|-------------|--------------|--------------|---------|
| 1      | 94.447        | BB   | 2.0179      | 2.37865e4    | 149.84703    | 50.4603 |
| 2      | 110.486       | BB   | 2.2590      | 2.33525e4    | 120.92726    | 49.5397 |

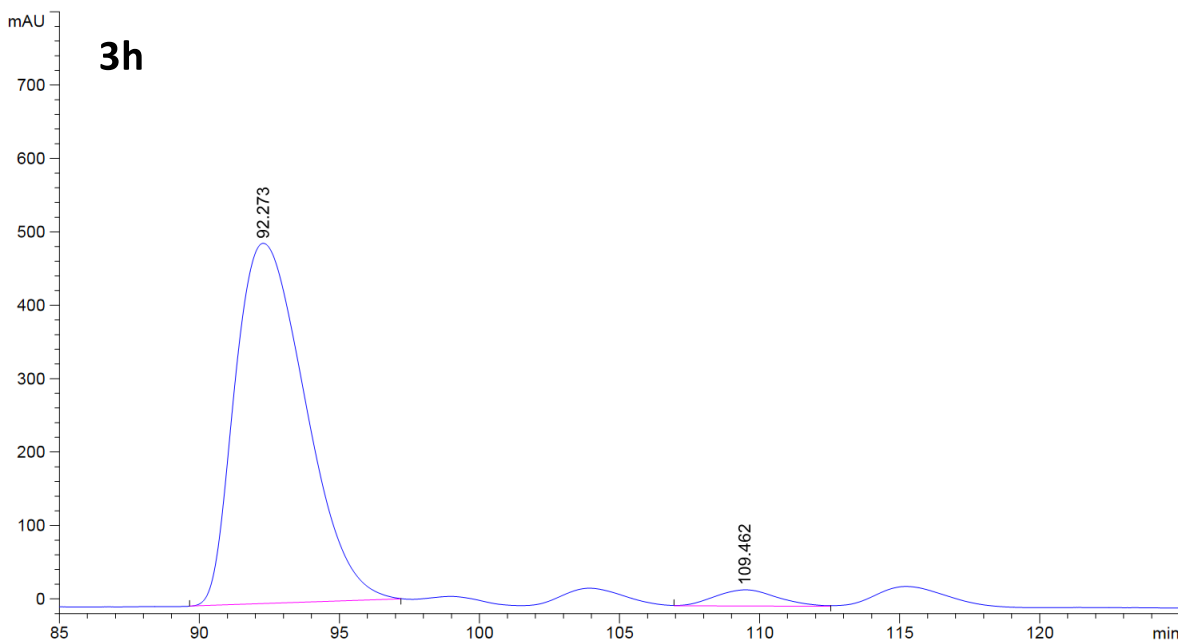

| Peak # | RetTime [min] | Type | Width [min] | Area [mAU*s] | Height [mAU] | Area %  |
|--------|---------------|------|-------------|--------------|--------------|---------|
| 1      | 92.273        | BB   | 2.4088      | 8.58074e4    | 491.02670    | 96.1458 |
| 2      | 109.462       | VV   | 1.8262      | 3439.77051   | 22.12077     | 3.8542  |

**(S)-3,3-dimethyl-1-(thiophen-2-yl)pent-4-en-2-ol (3i)**

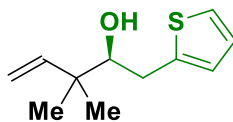

Alcohol **2i** (25.6 mg, 0.2 mmol) was subjected to standard reaction conditions (115 °C, 48 h) with DME (0.5 M) as solvent. Flash column chromatography (SiO<sub>2</sub>: 2:98 EtOAc:hexanes) provided the title compound **3i** as a yellow oil in 65% yield (25.5 mg, 0.13 mmol, 12:1 rr, 88% ee).

**Separation of regioisomers:** Flash column chromatography (SiO<sub>2</sub>: 1:99 EtOAc:hexanes).

**TLC (SiO<sub>2</sub>):** R<sub>f</sub> = 0.5 (1:4 EtOAc:hexanes).

**<sup>1</sup>H NMR** (500 MHz, CDCl<sub>3</sub>): δ 7.17 (d, *J* = 5.2 Hz, 1H), 6.95 (dd, *J* = 5.2, 3.4 Hz, 1H), 6.87 (d, *J* = 3.4 Hz, 1H), 5.91 (dd, *J* = 17.5, 10.8 Hz, 1H), 5.15 – 5.07 (m, 2H), 3.53 (ddd, *J* = 10.6, 3.7, 2.0 Hz, 1H), 3.08 (dd, *J* = 14.8, 2.0 Hz, 1H), 2.74 (dd, *J* = 14.8, 10.6 Hz, 1H), 1.76 (d, *J* = 3.7 Hz, 1H), 1.11 (s, 6H).

**<sup>13</sup>C NMR** (126 MHz, CDCl<sub>3</sub>): δ 145.0, 142.3, 127.0, 125.8, 124.2, 113.5, 79.3, 41.5, 33.0, 23.0, 22.9.

**HRMS** (Na<sup>+</sup>, *m/z*) for C<sub>11</sub>H<sub>16</sub>OS: calcd. = 219.0892; found = 219.0895.

**FTIR** (neat): 3397, 2960, 2927, 2872, 1945, 1773, 1568, 1444, 1217, 1059, 912, 761, 691, 674 cm<sup>-1</sup>.

**HPLC:** (Chiralcel columns Amylose 3, Hexane:2-PrOH = 99:01, 0.5 mL/min, 210 nm).

**[α]<sub>D</sub><sup>24</sup>** = -44.5 (c = 0.1, CHCl<sub>3</sub>).

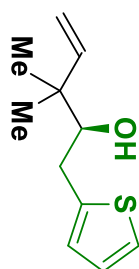

$^1\text{H}$  (500 MHz,  $\text{CDCl}_3$ )

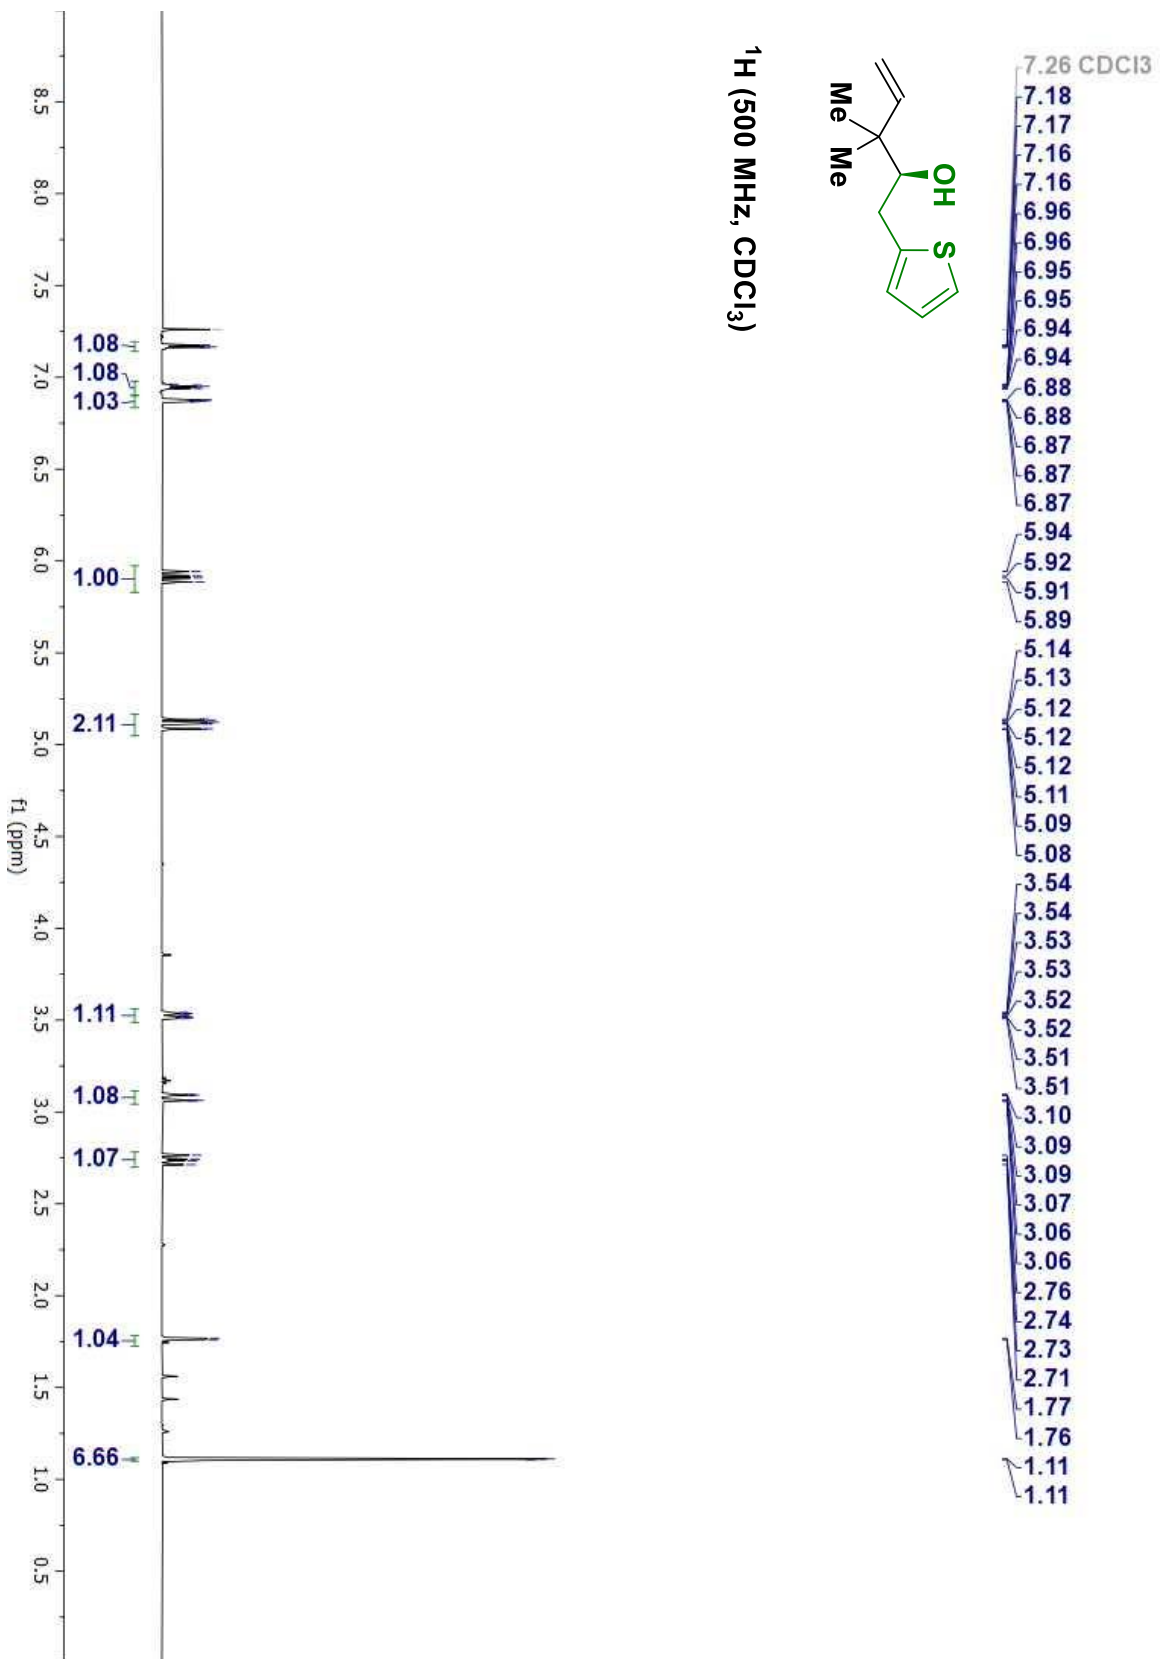

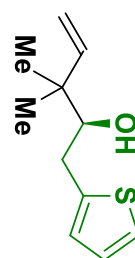

- 145.03
- 142.32
- 127.04
- 125.81
- 124.23
- 113.45
- 79.29
- 77.16 CDCl<sub>3</sub>
- 41.54
- 32.97
- 23.03
- 22.85

<sup>13</sup>C (126 MHz, CDCl<sub>3</sub>)

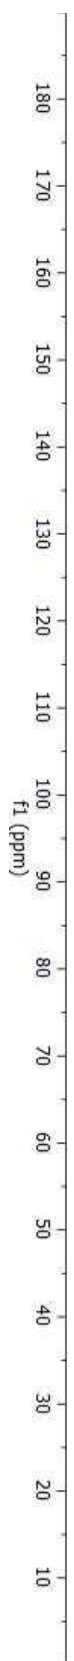

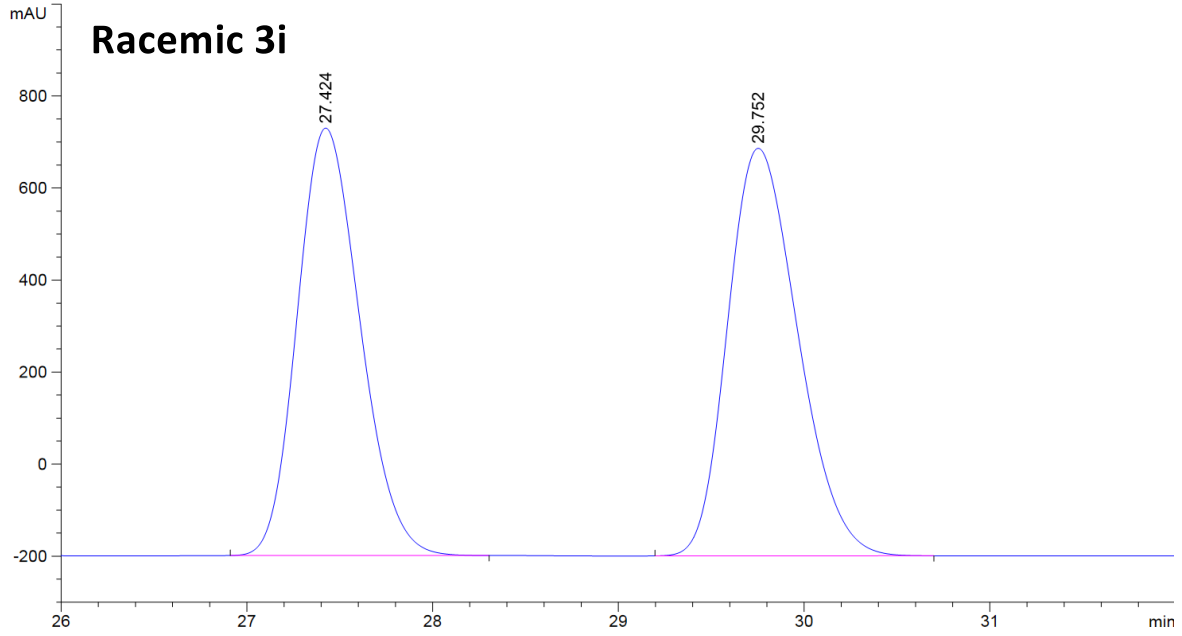

| Peak # | RetTime [min] | Type | Width [min] | Area [mAU*s] | Height [mAU] | Area %  |
|--------|---------------|------|-------------|--------------|--------------|---------|
| 1      | 27.424        | BB   | 0.3660      | 2.18262e4    | 929.38342    | 48.3963 |
| 2      | 29.752        | BB   | 0.4124      | 2.32727e4    | 886.13647    | 51.6037 |

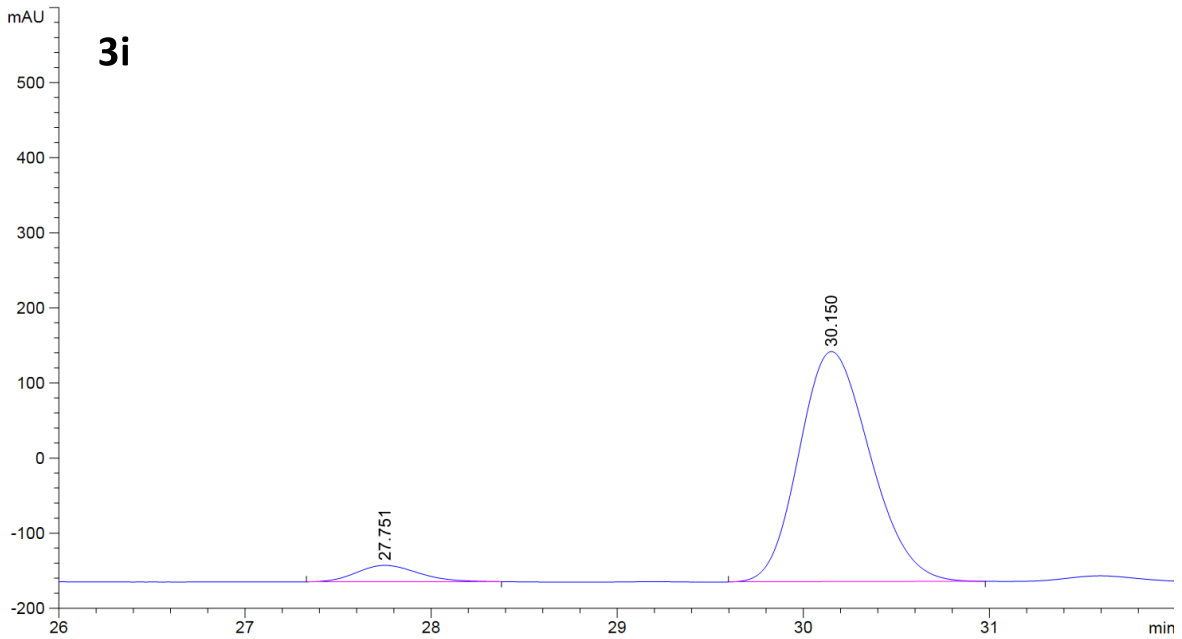

| Peak # | RetTime [min] | Type | Width [min] | Area [mAU*s] | Height [mAU] | Area %  |
|--------|---------------|------|-------------|--------------|--------------|---------|
| 1      | 27.751        | BB   | 0.3578      | 516.09271    | 21.99064     | 5.9518  |
| 2      | 30.150        | BB   | 0.4163      | 8155.11182   | 306.59778    | 94.0482 |

**(S)-3,3-dimethyl-1-(4-methylthiazol-5-yl)pent-4-en-2-ol (3j)**

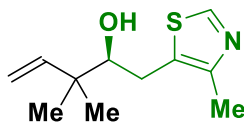

Alcohol **2j** (28.6 mg, 0.2 mmol) was subjected to standard reaction conditions (120 °C, 48 h). Flash column chromatography (SiO<sub>2</sub>: 25:75 EtOAc:hexanes) provided the title compound **3j** as a red oil in 72% yield (30.5 mg, 0.14 mmol, 16:1 rr, 88% ee).

**Separation of regioisomers:** Flash column chromatography (SiO<sub>2</sub>: 10:90 EtOAc:hexanes).

**TLC (SiO<sub>2</sub>):** R<sub>f</sub> = 0.3 (1:1 EtOAc:hexanes).

**<sup>1</sup>H NMR** (400 MHz, CDCl<sub>3</sub>): δ 8.57 (s, 1H), 5.89 (dd, J = 17.5, 10.8 Hz, 1H), 5.22 – 5.06 (m, 2H), 3.43 (dd, J = 10.5, 1.9 Hz, 1H), 2.99 (dd, J = 15.1, 1.9 Hz, 1H), 2.66 (dd, J = 15.0, 10.5 Hz, 1H), 2.38 (s, 3H), 1.85 (s, 1H), 1.11 (s, 6H).

**<sup>13</sup>C NMR** (101 MHz, CDCl<sub>3</sub>): δ 150.0, 149.5, 144.7, 129.1, 114.0, 79.0, 41.7, 29.1, 22.8, 22.7, 15.2.

**HRMS** (Na<sup>+</sup>, *m/z*) for C<sub>11</sub>H<sub>17</sub>NOS: calcd. = 234.0898; found = 234.0899.

**FTIR** (neat): 3346, 2926, 2911, 1567, 1429, 1393, 1258, 1023, 734, 693 cm<sup>-1</sup>.

**HPLC:** (Chiralcel columns Amylose 3, Hexane:2-PrOH = 97:03, 0.5 mL/min, 210 nm).

**[α]<sub>D</sub><sup>24</sup>** = -36.4 (c = 0.1, CHCl<sub>3</sub>).

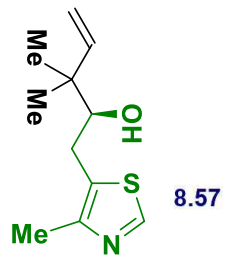

$^1\text{H}$  (400 MHz,  $\text{CDCl}_3$ )

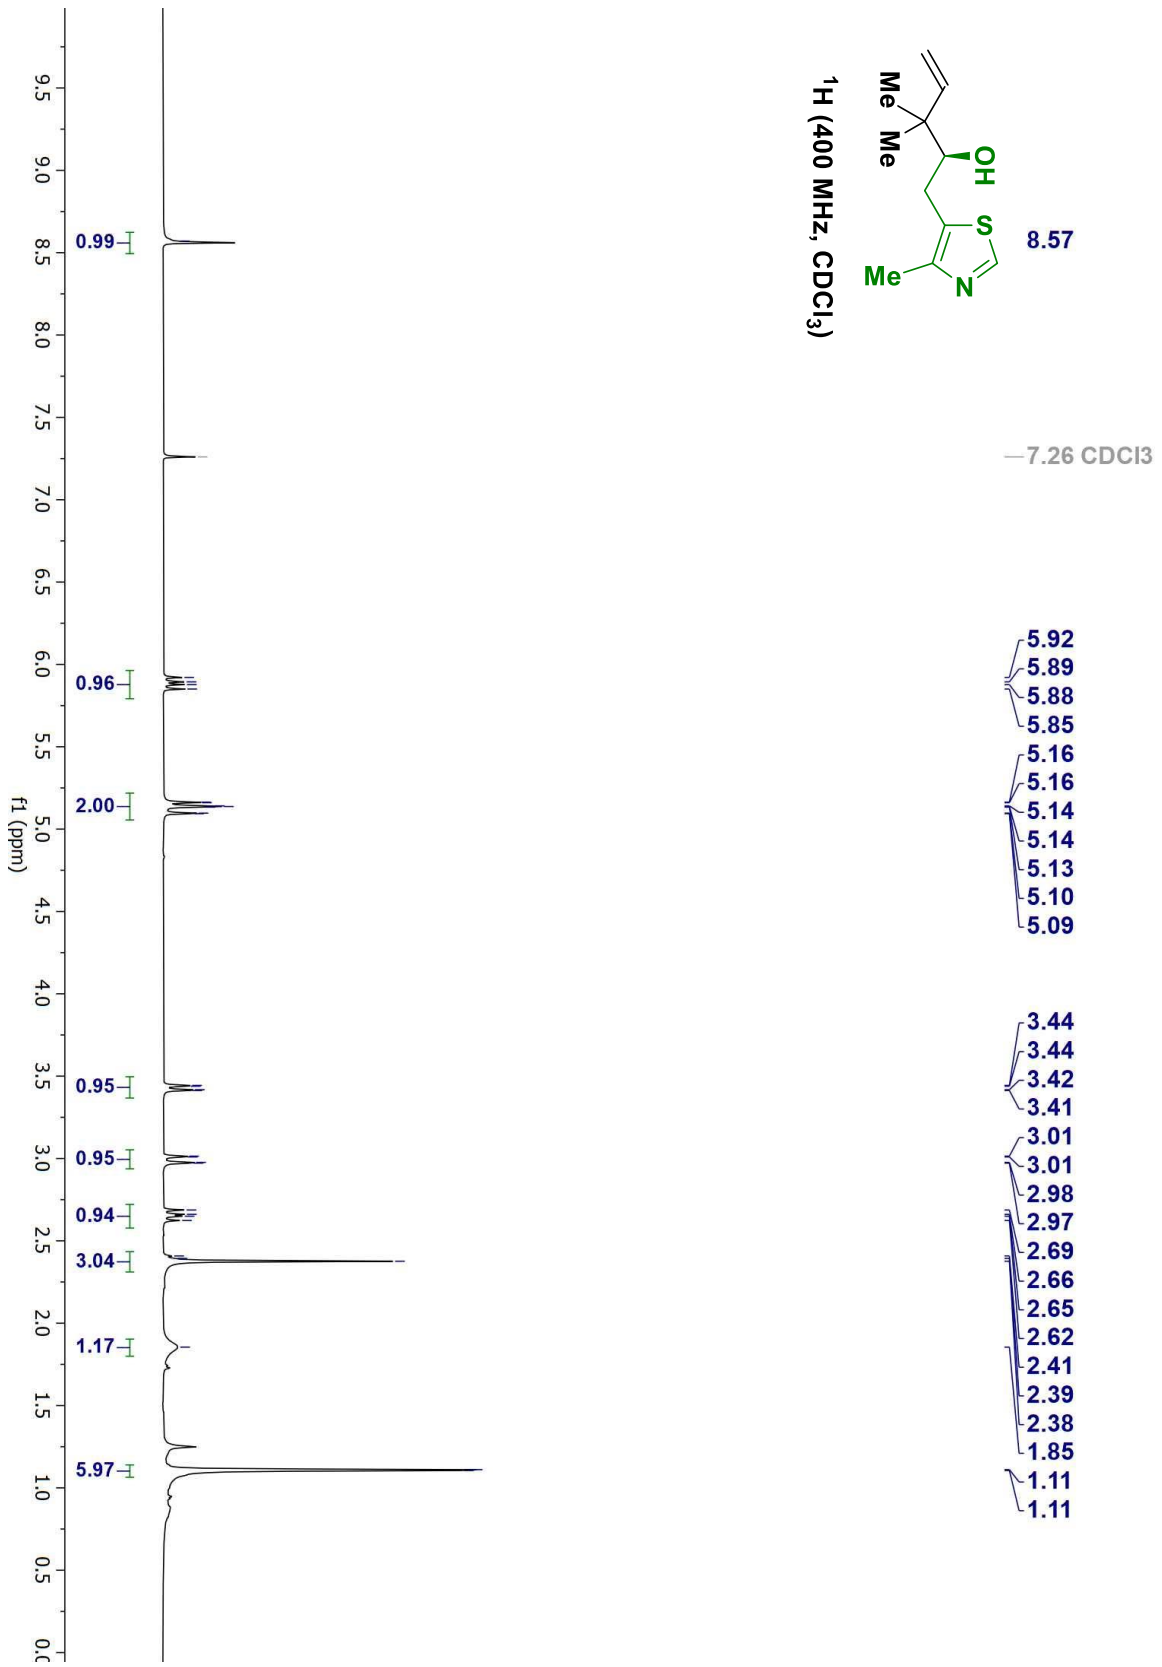



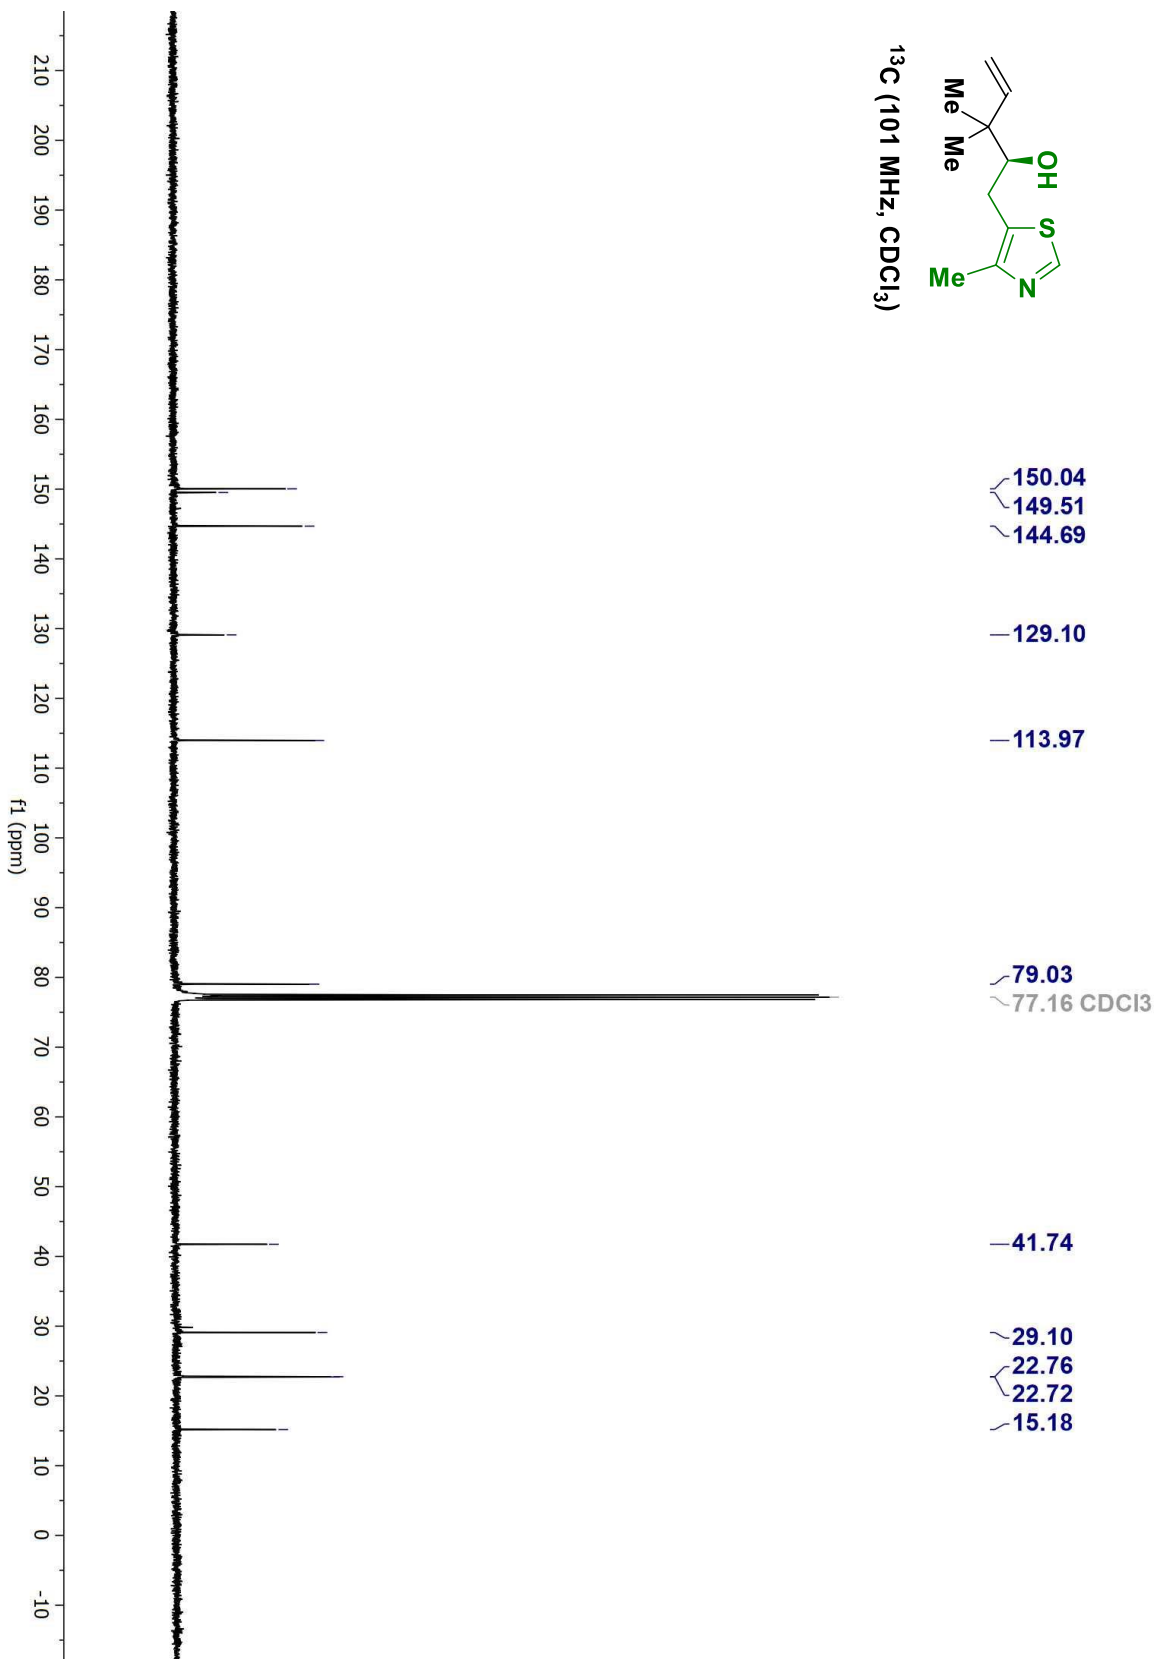

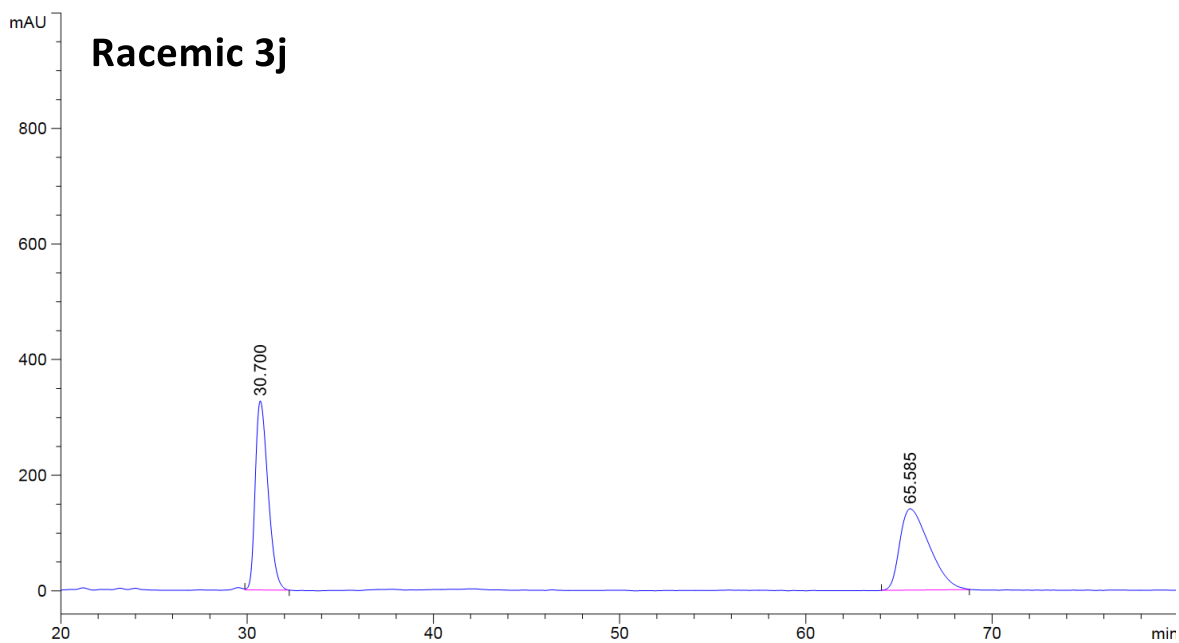

| Peak # | RetTime [min] | Type | Width [min] | Area [mAU*s] | Height [mAU] | Area %  |
|--------|---------------|------|-------------|--------------|--------------|---------|
| 1      | 30.700        | VB   | 0.7415      | 1.56413e4    | 327.31174    | 50.1866 |
| 2      | 65.585        | BB   | 1.5796      | 1.55250e4    | 140.88731    | 49.8134 |

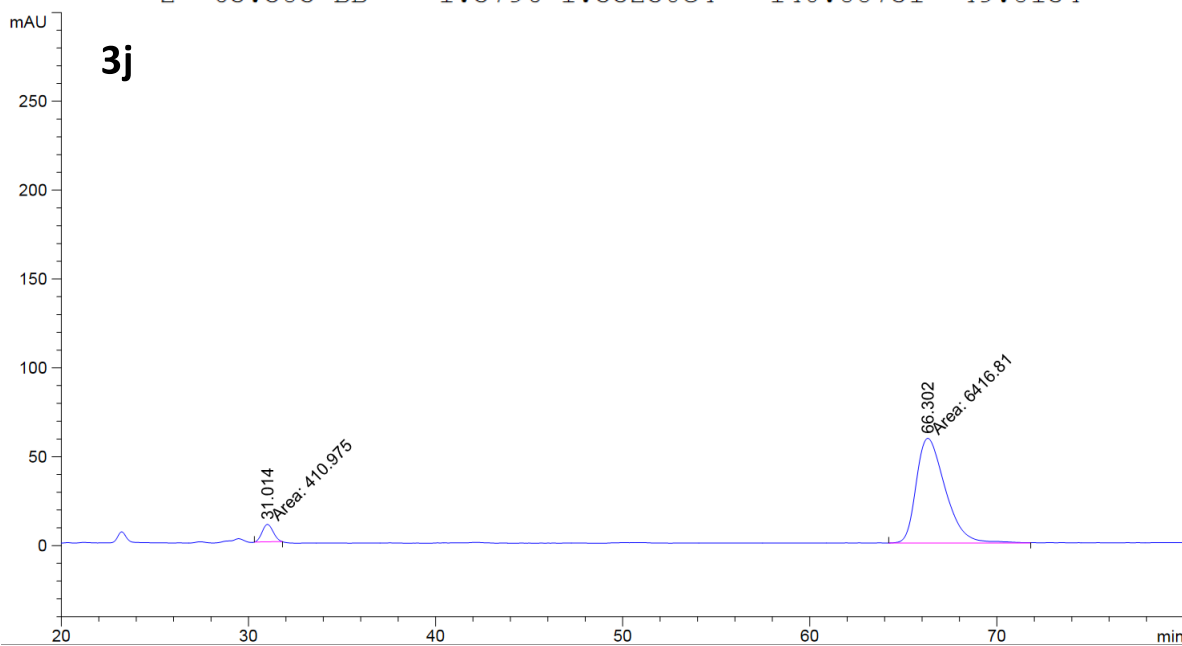

| Peak # | RetTime [min] | Type | Width [min] | Area [mAU*s] | Height [mAU] | Area %  |
|--------|---------------|------|-------------|--------------|--------------|---------|
| 1      | 31.014        | MM   | 0.6916      | 410.97479    | 9.90449      | 6.0192  |
| 2      | 66.302        | MM   | 1.8128      | 6416.81299   | 58.99518     | 93.9808 |

**tert-butyl (S)-4-(5-(3-hydroxy-4,4-dimethylhex-5-en-1-yl)pyrimidin-2-yl)piperazine-1-carboxylate (3k)**

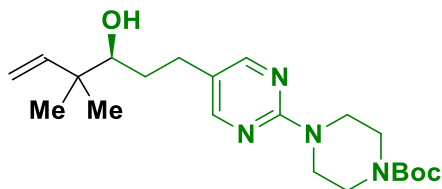

Alcohol **2k** (64.5 mg, 0.2 mmol) was subjected to standard reaction conditions (115 °C, 48 h) with  $\text{RuH}_2\text{CO}(\text{PPh}_3)_3$  (5 mol%), and LiI (10 mol%). Flash column chromatography ( $\text{SiO}_2$ : 25:75 EtOAc:hexanes) provided the title compound **3k** as a yellow oil in 73% yield (56.7 mg, 0.15 mmol, 12:1 rr, 85% ee).

**Separation of regioisomers:** Flash column chromatography ( $\text{SiO}_2$ : 10:90 EtOAc:hexanes).

**TLC ( $\text{SiO}_2$ ):**  $R_f = 0.4$  (1:1 EtOAc:hexanes).

**$^1\text{H NMR}$**  (500 MHz,  $\text{CDCl}_3$ ):  $\delta$  8.18 (s, 2H), 5.75 (dd,  $J = 17.5, 10.8$  Hz, 1H), 5.08 (dd,  $J = 10.8, 1.3$  Hz, 1H), 5.03 (dd,  $J = 17.5, 1.3$  Hz, 1H), 3.75 (t,  $J = 5.2$  Hz, 4H), 3.48 (t,  $J = 5.2$  Hz, 4H), 3.22 (ddd,  $J = 10.8, 4.8, 1.9$  Hz, 1H), 2.70 (ddd,  $J = 14.2, 9.4, 4.8$  Hz, 1H), 2.45 (ddd,  $J = 14.2, 9.0, 7.5$  Hz, 1H), 1.74 – 1.66 (m, 1H), 1.65 (d,  $J = 4.8$  Hz, 1H), 1.56 – 1.49 (m, 1H), 1.47 (s, 9H), 0.97 (s, 6H).

**$^{13}\text{C NMR}$**  (126 MHz,  $\text{CDCl}_3$ ):  $\delta$  160.9, 157.8, 155.0, 145.2, 123.3, 113.9, 80.0, 43.9, 41.8, 32.9, 28.6, 26.7, 23.2, 21.9.

**HRMS** ( $\text{H}^+$ ,  $m/z$ ) for  $\text{C}_{21}\text{H}_{34}\text{N}_4\text{O}_3$ : calcd. = 391.2704; found = 391.2710.

**FTIR** (neat): 3456, 2972, 2860, 1694, 1493, 1416, 1361, 1243, 1164, 1077, 998, 795  $\text{cm}^{-1}$ .

**HPLC:** (Chiralcel columns AD-H 4, Hexane:2-PrOH = 95:5, 0.5 mL/min, 210 nm).

$[\alpha]_D^{24} = -10.7$  ( $c = 0.1$ ,  $\text{CHCl}_3$ ).

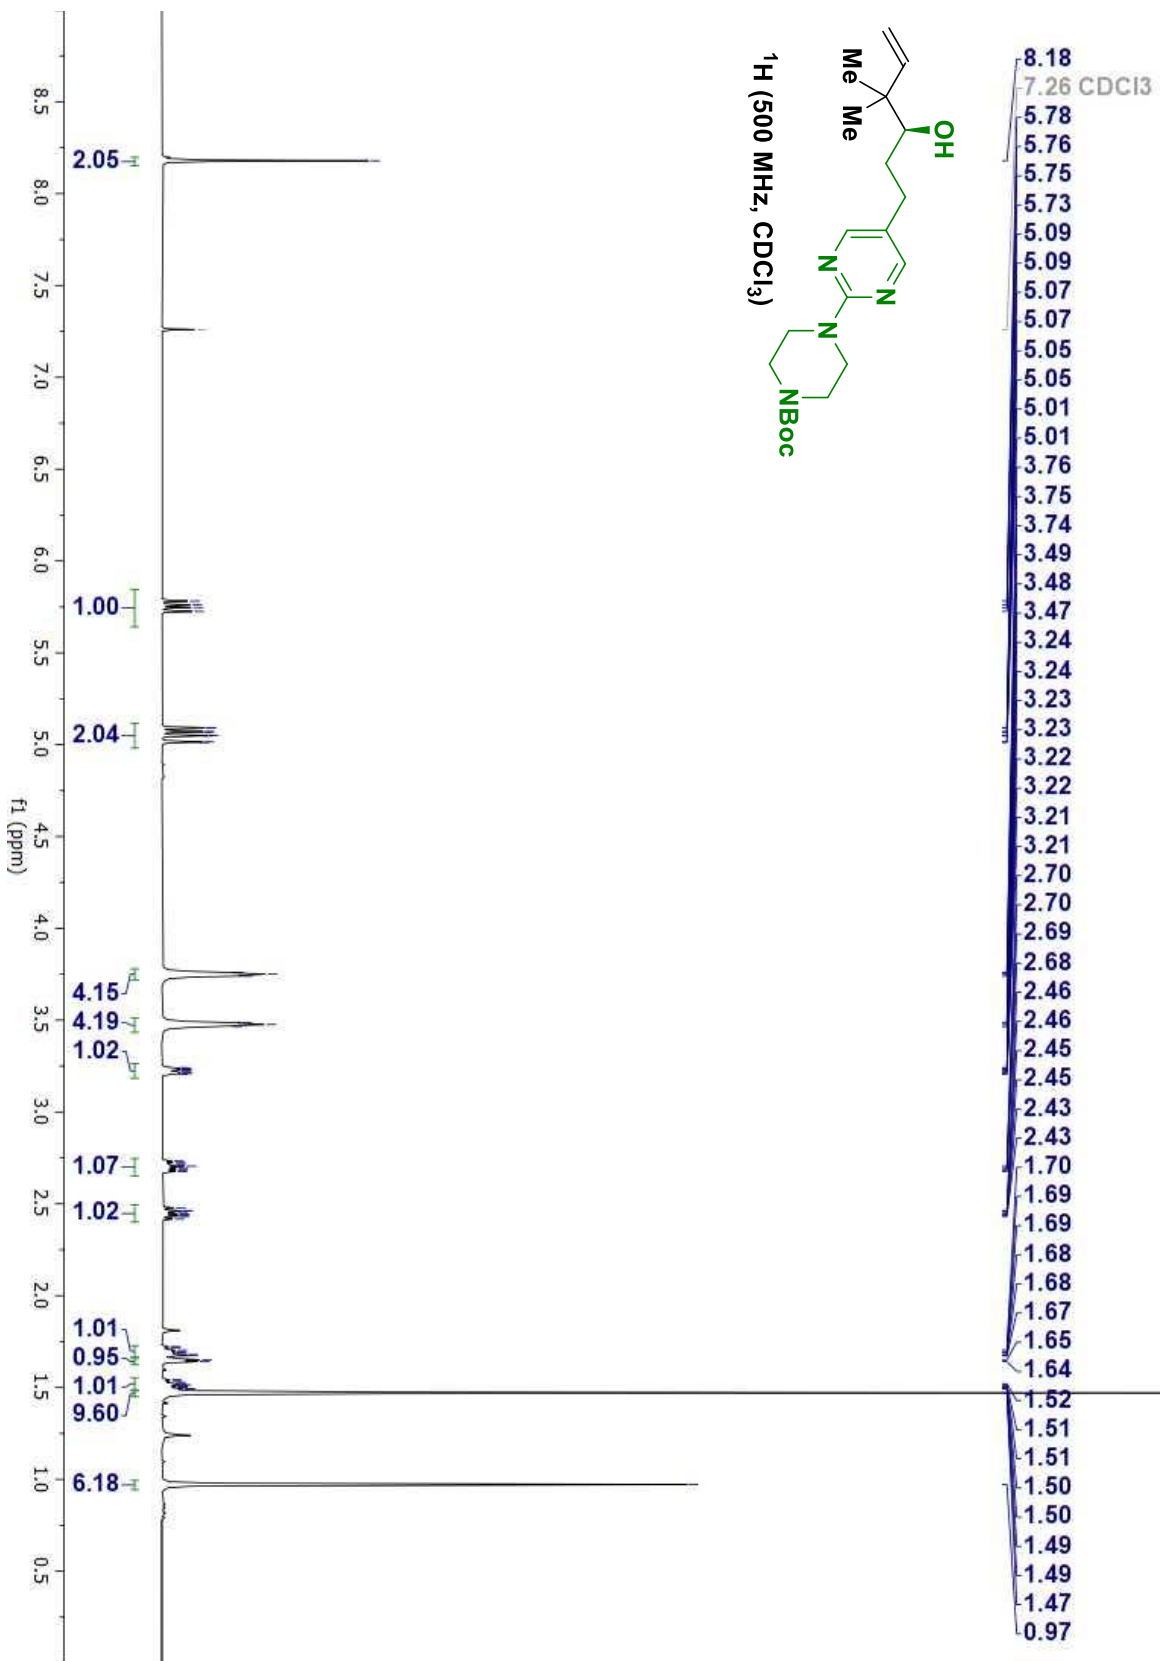

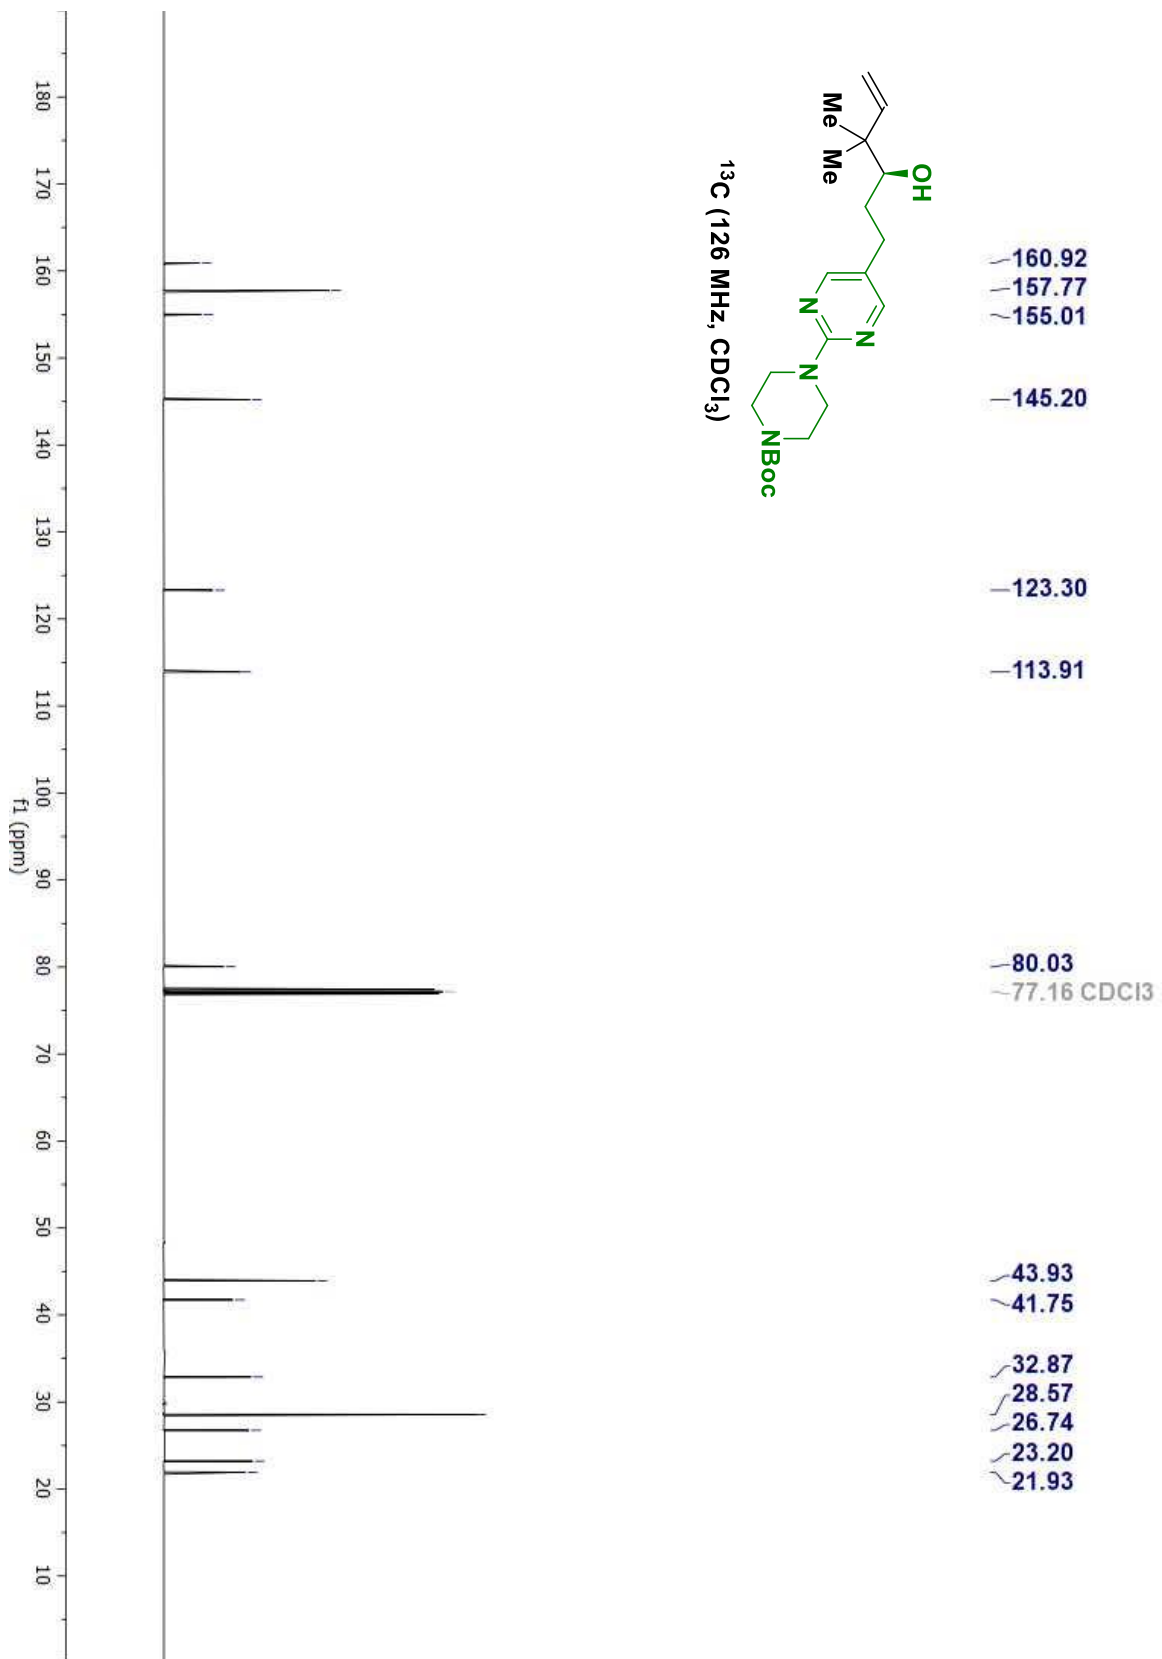

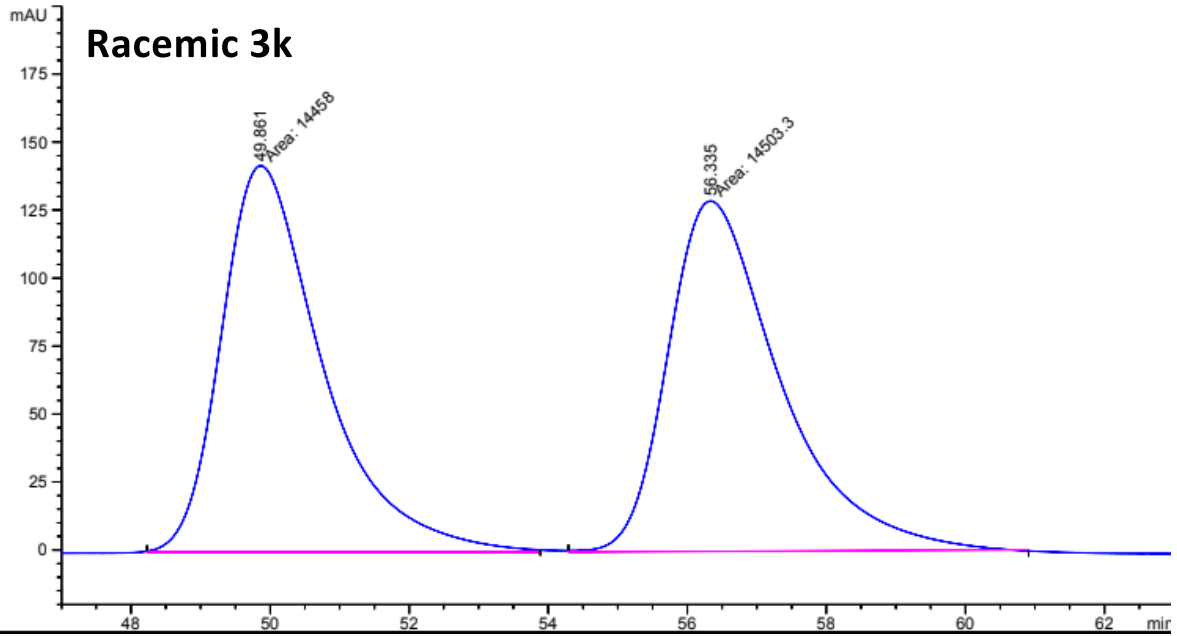

| Peak # | RetTime [min] | Type | Width [min] | Area [mAU*s] | Height [mAU] | Area %  |
|--------|---------------|------|-------------|--------------|--------------|---------|
| 1      | 49.861        | MM   | 1.6957      | 1.44580e4    | 142.10597    | 49.9219 |
| 2      | 56.335        | MM   | 1.8754      | 1.45033e4    | 128.88811    | 50.0781 |

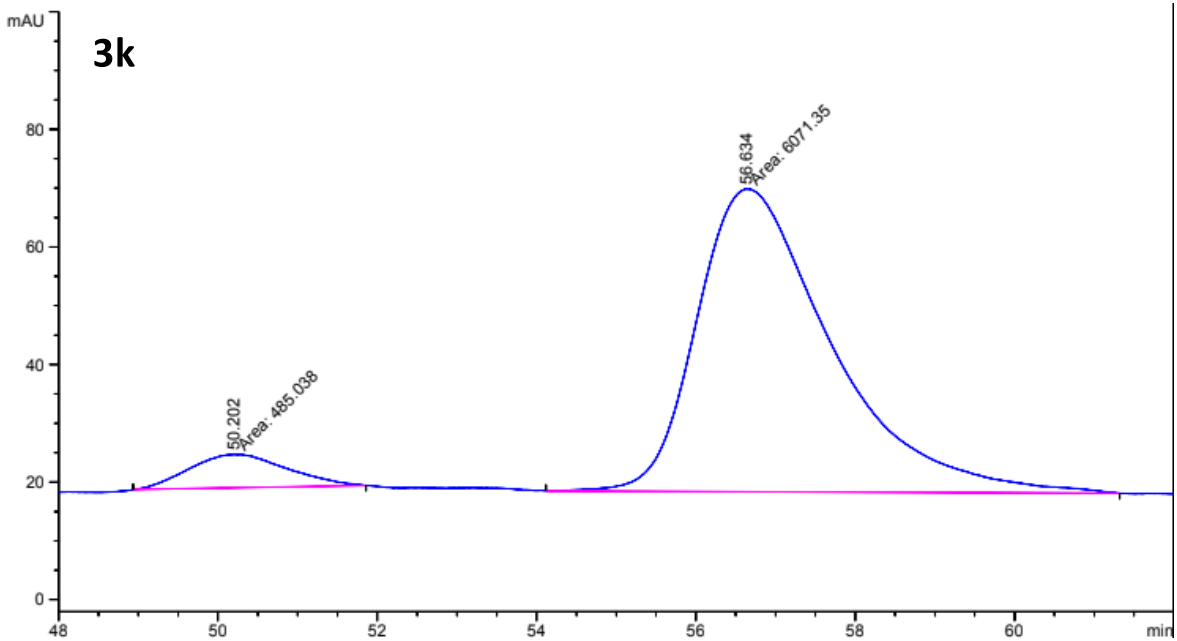

| Peak # | RetTime [min] | Type | Width [min] | Area [mAU*s] | Height [mAU] | Area %  |
|--------|---------------|------|-------------|--------------|--------------|---------|
| 1      | 50.202        | MM   | 1.4209      | 485.03766    | 5.68940      | 7.3979  |
| 2      | 56.634        | MM   | 1.9642      | 6071.35303   | 51.51575     | 92.6021 |

**(S)-1-(6-methoxypyridin-3-yl)-4,4-dimethylhex-5-en-3-ol (3I)**

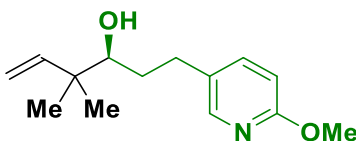

Alcohol **2I** (33.4 mg, 0.2 mmol) was subjected to standard reaction conditions (115 °C, 48 h). Flash column chromatography (SiO<sub>2</sub>: 10:90 EtOAc:hexanes) provided the title compound **3I** as a yellow oil in 74% yield (37.8 mg, 0.149 mmol, 13:1 rr, 85% ee).

**Separation of regioisomers:** Flash column chromatography (SiO<sub>2</sub>: 5:95 EtOAc:hexanes).

**TLC (SiO<sub>2</sub>):** R<sub>f</sub> = 0.32 (1:3 EtOAc:hexanes).

**<sup>1</sup>H NMR** (500 MHz, CDCl<sub>3</sub>): δ 8.00 (s, 1H), 7.43 (d, *J* = 8.4 Hz, 1H), 6.68 (d, *J* = 8.4 Hz, 1H), 5.77 (dd, *J* = 17.5, 10.8 Hz, 1H), 5.12 – 5.02 (m, 2H), 3.91 (s, 3H), 3.28 – 3.22 (m, 1H), 2.87 – 2.78 (m, 1H), 2.58 – 2.52 (m, 1H), 1.79 – 1.73 (m, 1H), 1.56 – 1.50 (m, 1H), 0.99 (s, 6H).

**<sup>13</sup>C NMR** (101 MHz, CDCl<sub>3</sub>) δ 162.8, 146.3, 145.3, 139.2, 130.2, 113.9, 110.5, 53.4, 41.7, 33.1, 29.4, 23.2, 21.9

**HRMS** (Na<sup>+</sup>, *m/z*) for C<sub>14</sub>H<sub>21</sub>NO<sub>2</sub>: calcd. = 258.1372; found = 258.1449.

**FTIR** (neat): 3388, 2948, 2925, 2855, 1736, 1608, 1572, 1492, 1462, 1415, 1390, 1364, 1074, 1028 cm<sup>-1</sup>.

**HPLC:** (Phenomenex LC Columns Cellulose-5, Hexane: 2-PrOH = 90:10, 1.0 mL/min, 210 nm).

[α]<sub>D</sub><sup>24</sup> = -19.0 (c = 0.1, CHCl<sub>3</sub>).

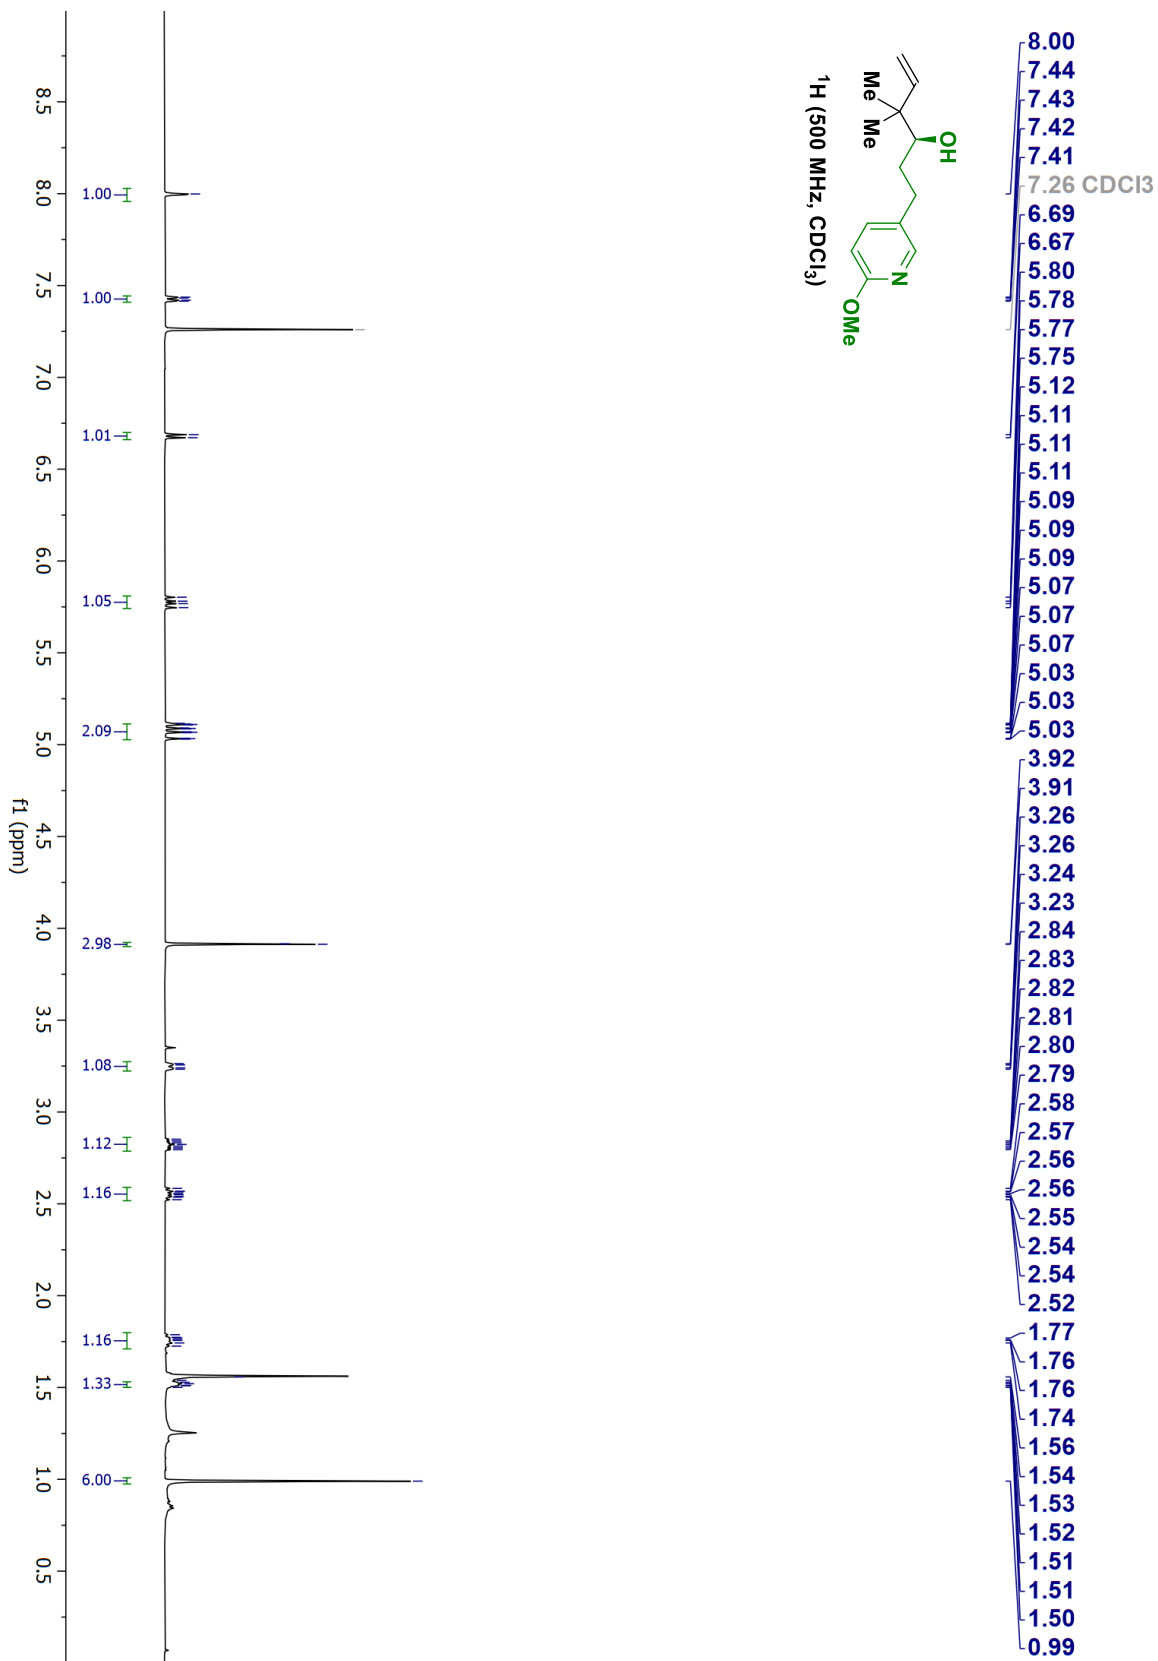



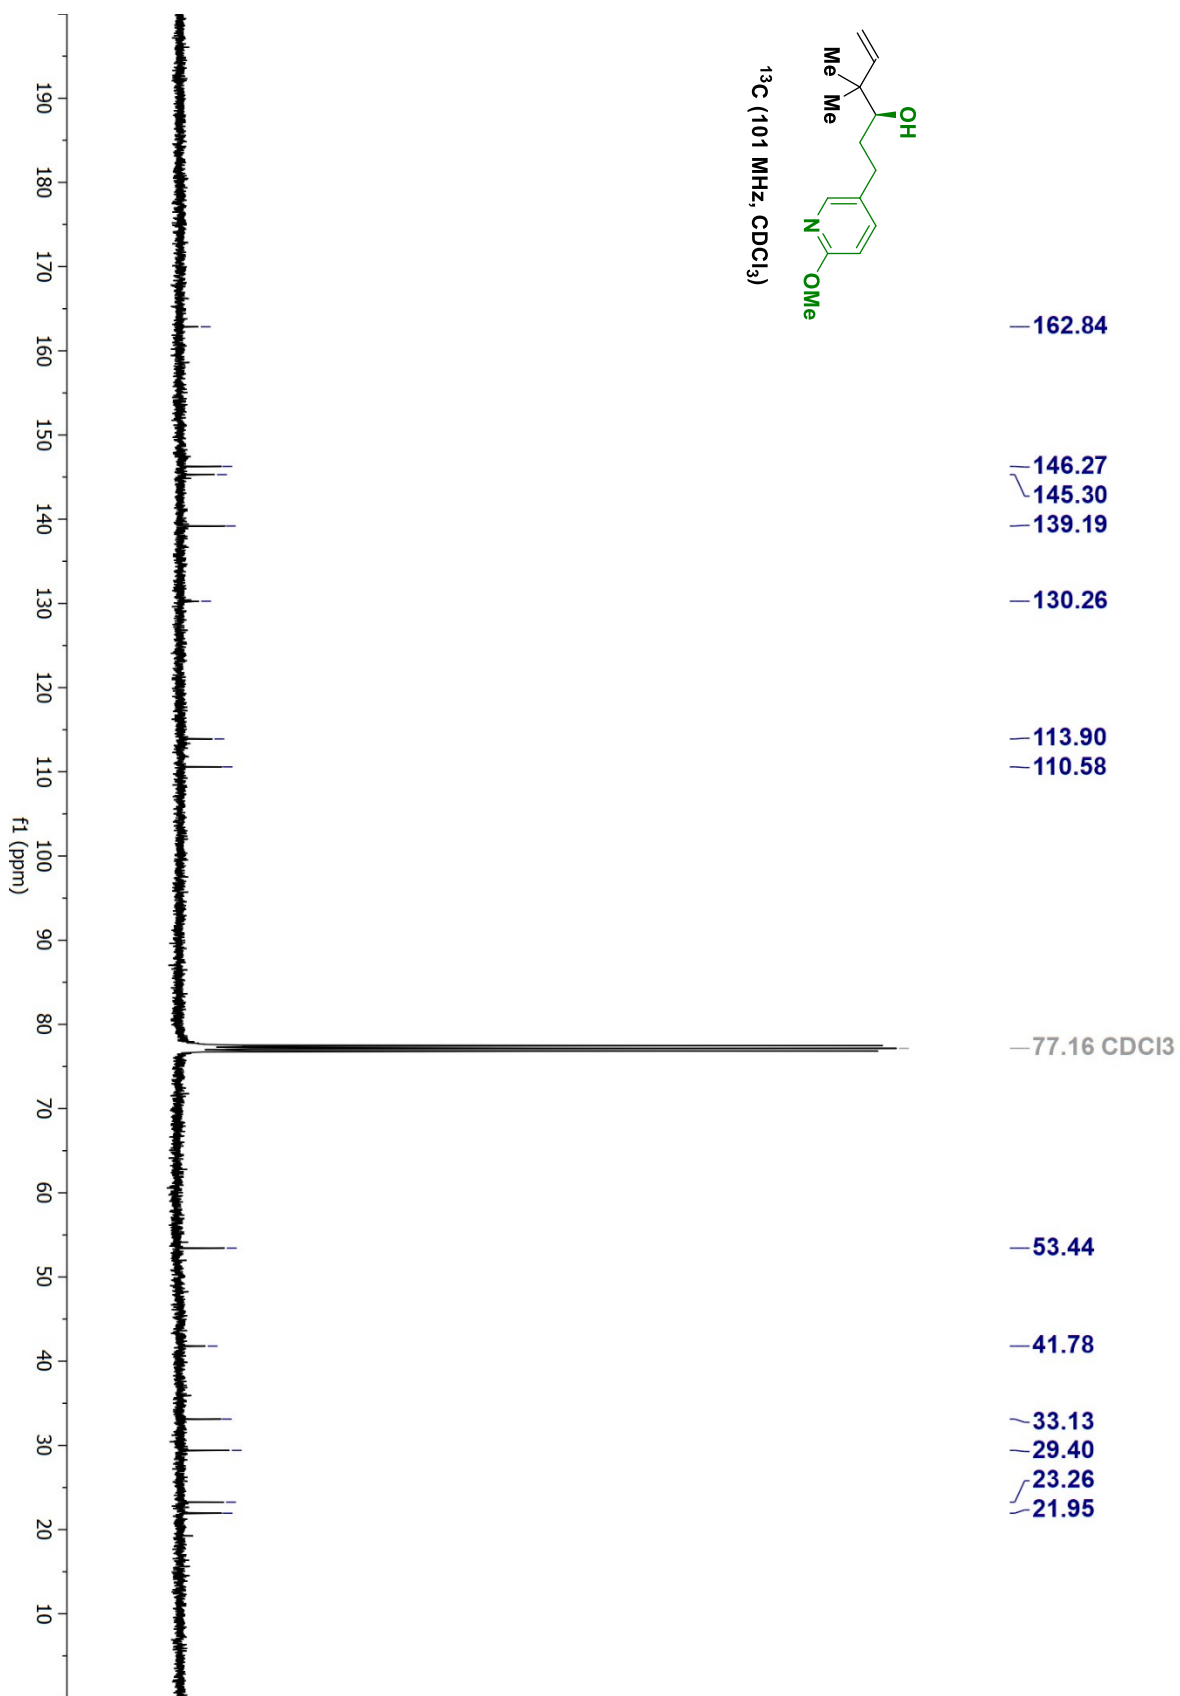

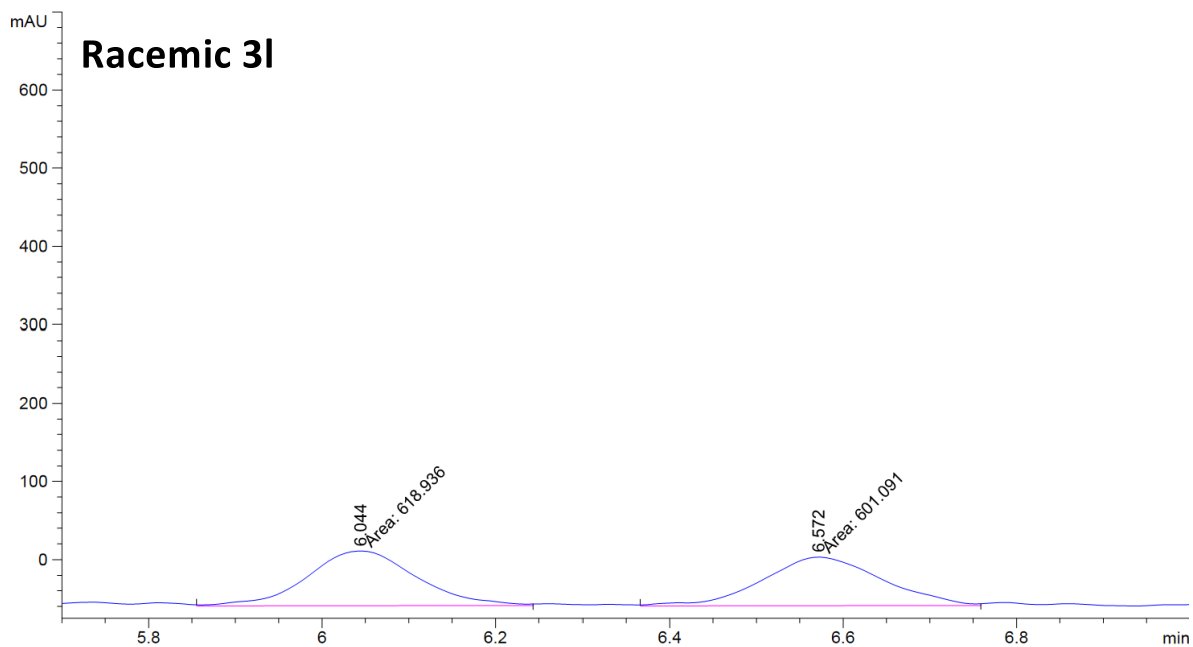

| Peak # | RetTime [min] | Type | Width [min] | Area [mAU*s] | Height [mAU] | Area %  |
|--------|---------------|------|-------------|--------------|--------------|---------|
| 1      | 6.044         | MM   | 0.1469      | 618.93591    | 70.22833     | 50.7313 |
| 2      | 6.572         | MM   | 0.1604      | 601.09106    | 62.45972     | 49.2687 |

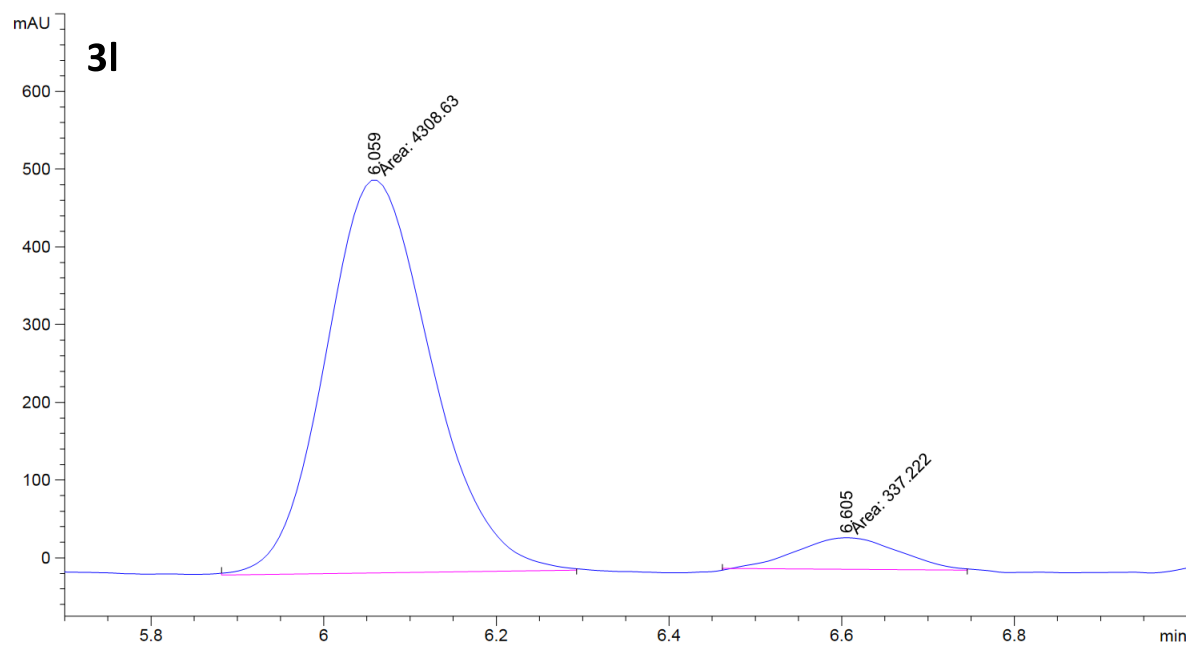

| Peak # | RetTime [min] | Type | Width [min] | Area [mAU*s] | Height [mAU] | Area %  |
|--------|---------------|------|-------------|--------------|--------------|---------|
| 1      | 6.059         | MM   | 0.1419      | 4308.63232   | 506.17874    | 92.7414 |
| 2      | 6.605         | MM   | 0.1382      | 337.22168    | 40.68252     | 7.2586  |

**tert-butyl (S)-4-((R)-3-hydroxy-4,4-dimethylhex-5-en-1-yl)-2,2-dimethyloxazolidine-3-carboxylate (3m)**

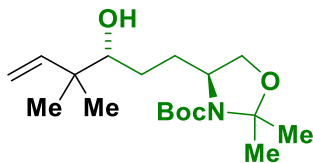

Alcohol **2m** (51.9 mg, 0.2 mmol) was subjected to standard reaction conditions (110 °C, 48 h) with (**S**)-**SEGP**HOS as ligand. Flash column chromatography (SiO<sub>2</sub>: 3:97 EtOAc:hexanes) provided the title compound **3m** as a yellow oil in 56% yield (36.2mg, 0.11 mmol, 10:1 rr, 6:1 dr).

**Separation of regioisomers:** Flash column chromatography (SiO<sub>2</sub>: 2:98 EtOAc:hexanes).

**TLC (SiO<sub>2</sub>):** R<sub>f</sub> = 0.25 (1:4 EtOAc:Hexanes).

**<sup>1</sup>H NMR** (500 MHz, CDCl<sub>3</sub>) δ: 5.94 – 5.70 (m, 1H), 5.94 – 5.70 (m, 2H), 4.00 – 3.88 (m, 2H), 3.70 (tt, *J* = 19.8, 8.7 Hz, 1H), 3.38 – 3.14 (m, 1H), 2.02 – 1.91 (m, 1H), 1.91 – 1.81 (m, 1H), 1.62 (s, 3H), 1.54 (s, 3H), 1.48 (s, 11H), 1.00 (s, 6H).

**<sup>13</sup>C NMR** (126 MHz, CDCl<sub>3</sub>) δ: 152.1, 145.3, 113.3, 93.9, 78.8, 78.4, 67.6, 67.3, 57.5, 48.2, 41.9, 29.9, 28.6, 27.9, 26.9, 24.7, 23.4, 23.1.

**HRMS** (Na<sup>+</sup>, *m/z*) for C<sub>18</sub>H<sub>33</sub>NO<sub>4</sub>: calcd. = 350.2302; found = 350.2298.

**FTIR** (neat): 3107, 3011, 2796, 1851, 1769, 1499, 1103, 499,406 cm<sup>-1</sup>.

**[α]<sub>D</sub><sup>24</sup>** = - 40.0 (c = 0.4, CHCl<sub>3</sub>)

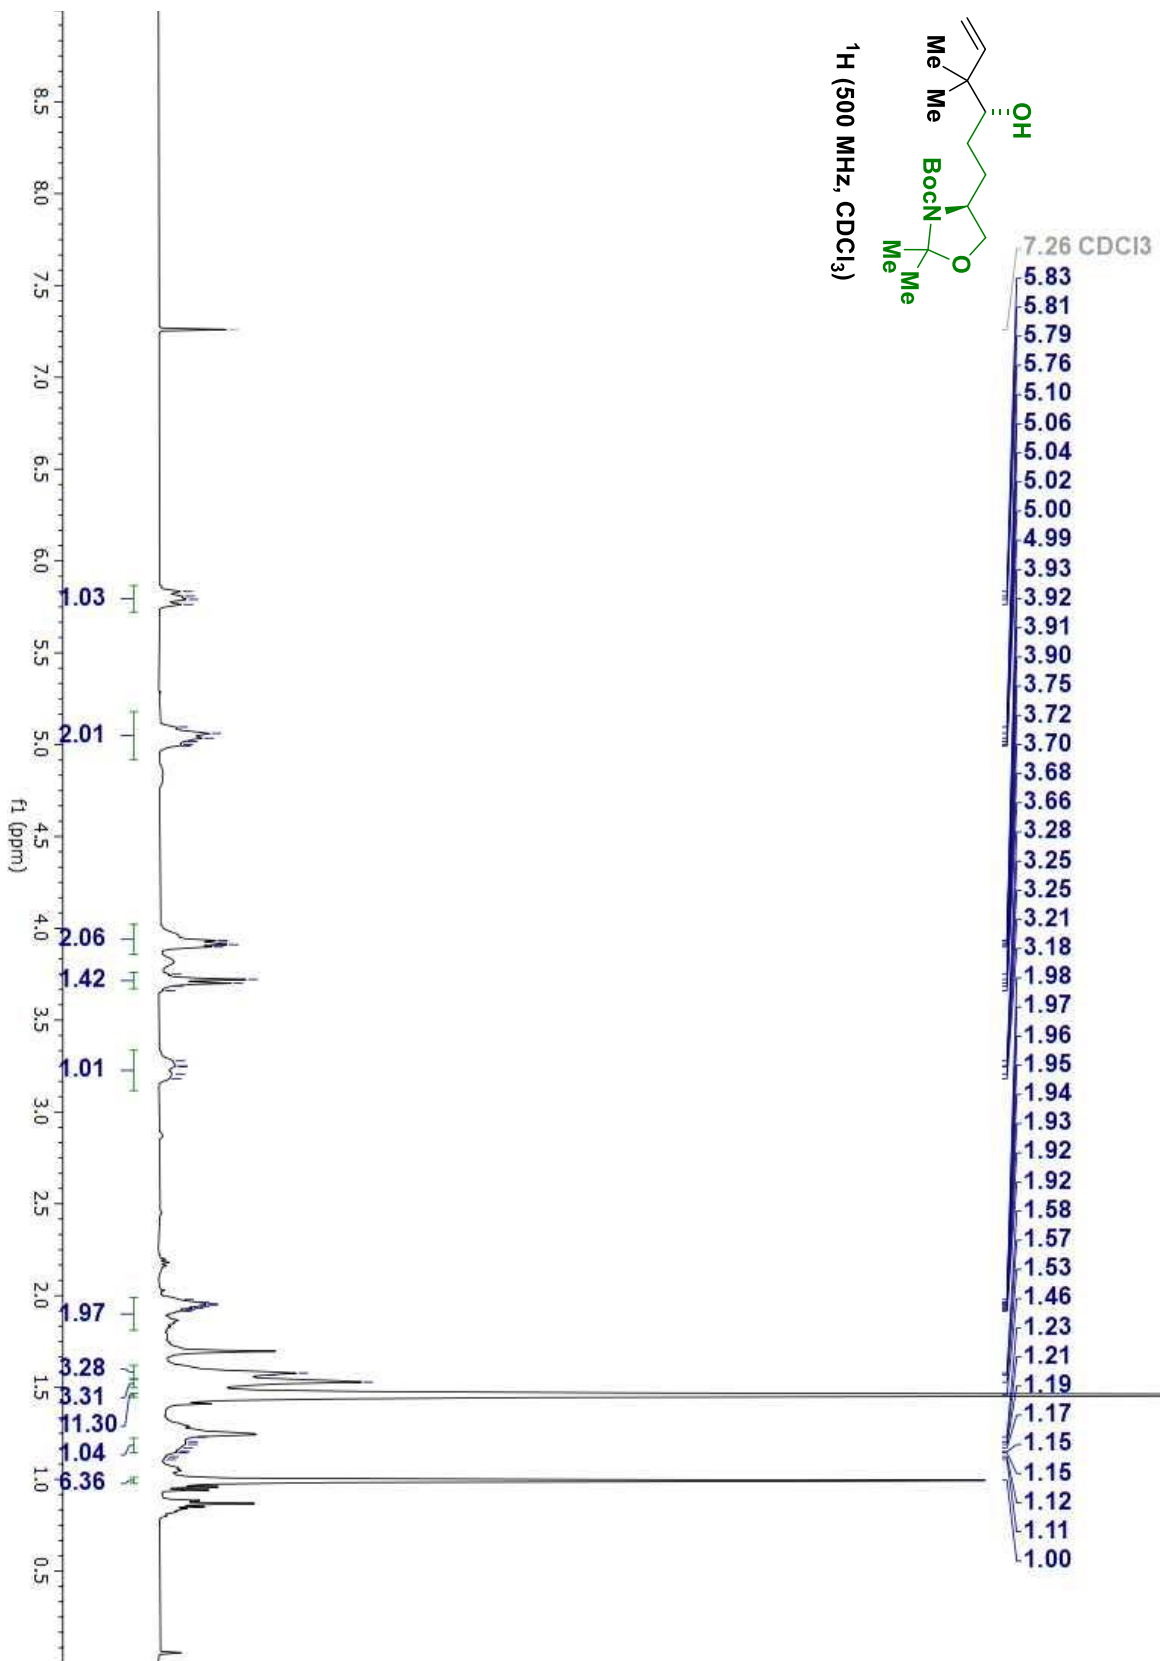

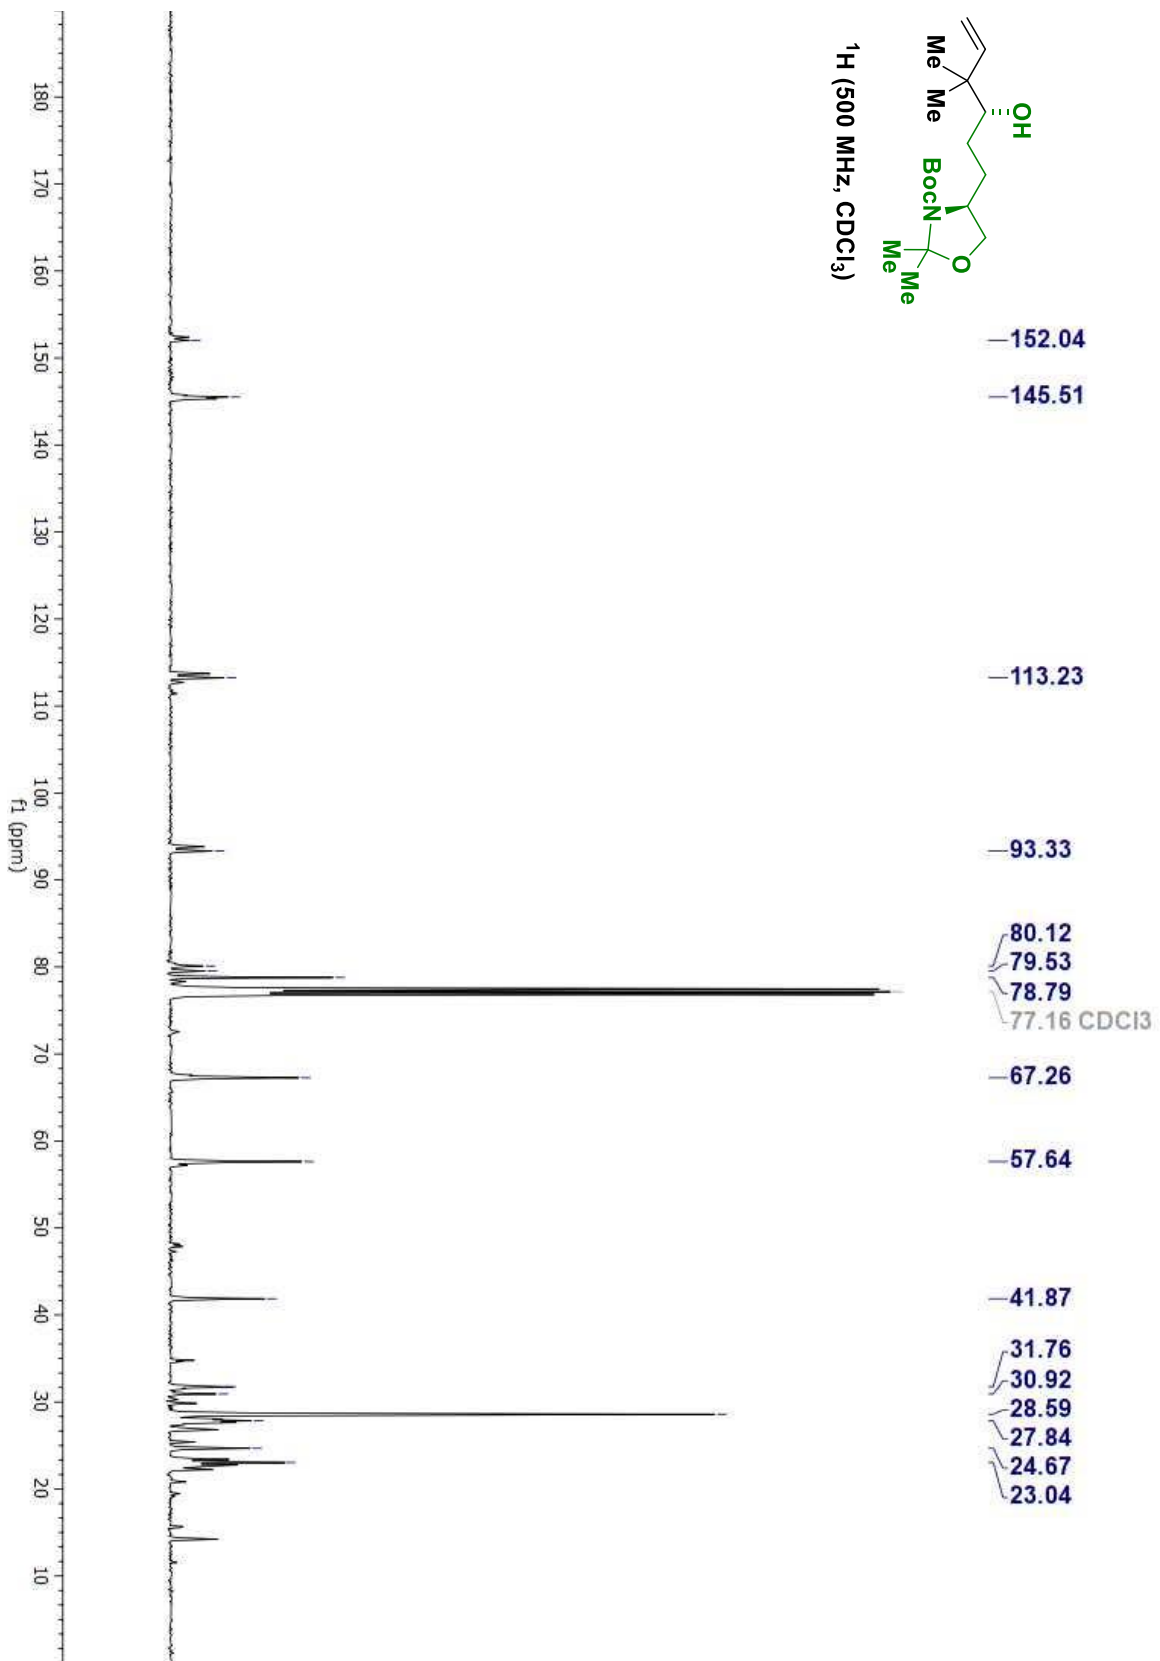

tert-butyl (S)-4-((S)-3-hydroxy-4,4-dimethylhex-5-en-1-yl)-2,2-dimethyloxazolidine-3-carboxylate (*epi*-3m)

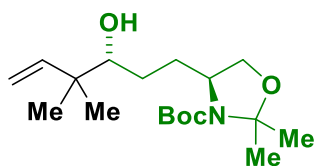

Alcohol **2m** (51.9 mg, 0.2 mmol) was subjected to standard reaction conditions (110 °C, 48 h) with (**R**)-**SEGP**HOS as ligand. Flash column chromatography (SiO<sub>2</sub>: 3:97 EtOAc:hexanes) provided the title compound *epi*-**3m** as a yellow oil in 55% yield (36.0 mg, 0.11 mmol, 12:1 rr, >20:1 dr).

**TLC** (SiO<sub>2</sub>): R<sub>f</sub> = 0.25 (1:4 EtOAc:Hexanes).

**<sup>1</sup>H NMR** (500 MHz, CDCl<sub>3</sub>): δ 5.82 (m, 1H), 5.15 – 4.95 (m, 2H), 4.07 – 3.87 (m, 2H), 3.70 (tt, *J* = 21.1, 8.8 Hz, 1H), 3.39 – 3.15 (m, 1H), 2.04 – 1.91 (m, 1H), 1.89 – 1.82 (m, 1H), 1.61 (s, 3H), 1.54 (s, 3H), 1.47 (s, 11H), 1.01 (s, 6H).

**<sup>13</sup>C NMR** (126 MHz, CDCl<sub>3</sub>): δ 152.1, 145.3, 113.3, 93.9, 78.8, 78.4, 67.6, 67.3, 57.6, 48.2, 41.9, 29.9, 28.6, 27.9, 26.9, 24.7, 23.4, 23.1.

**HRMS** (Na<sup>+</sup>, *m/z*) for C<sub>18</sub>H<sub>33</sub>NO<sub>4</sub>: calcd. = 350.2302; found = 350.2298.

**FTIR** (neat): 3273, 3021, 2846, 1892, 1738, 1506, 1178, 536 cm<sup>-1</sup>.

$[\alpha]_D^{24} = +40.0$  (c = 0.4, CHCl<sub>3</sub>)

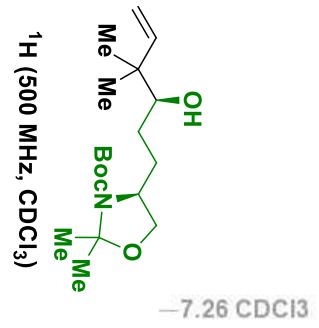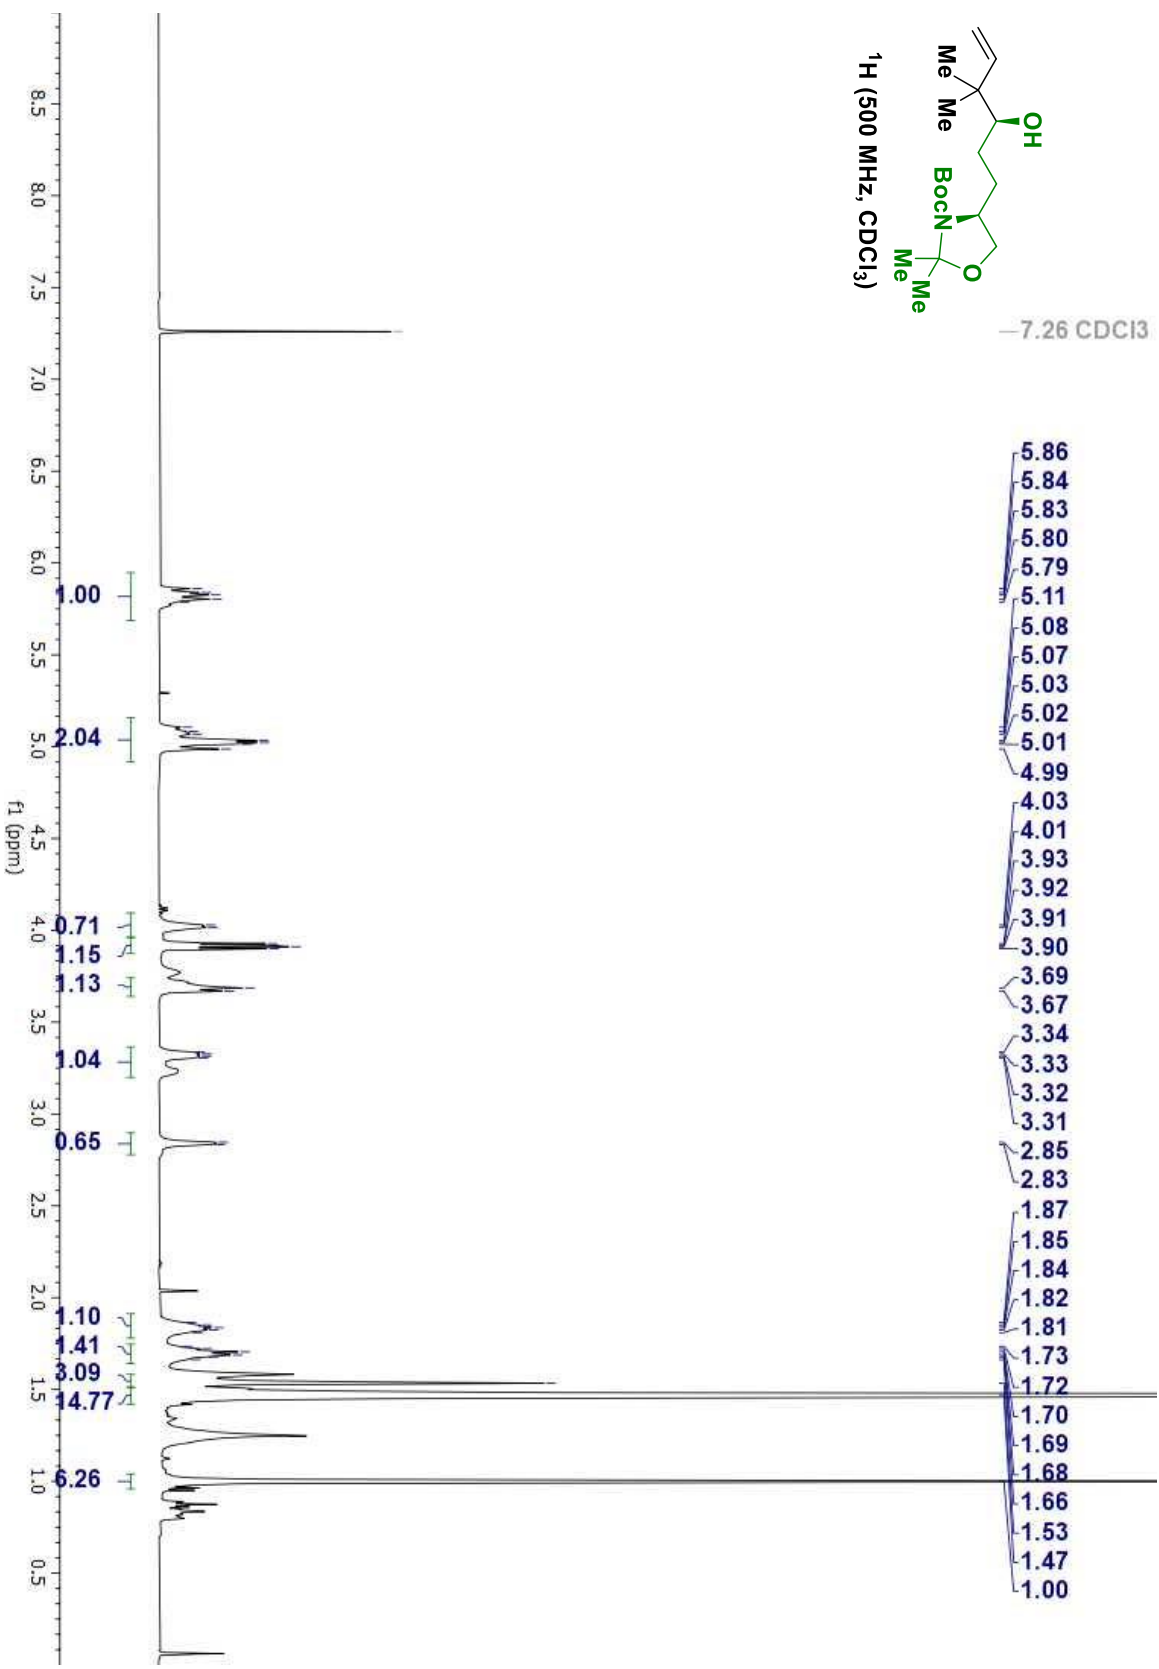

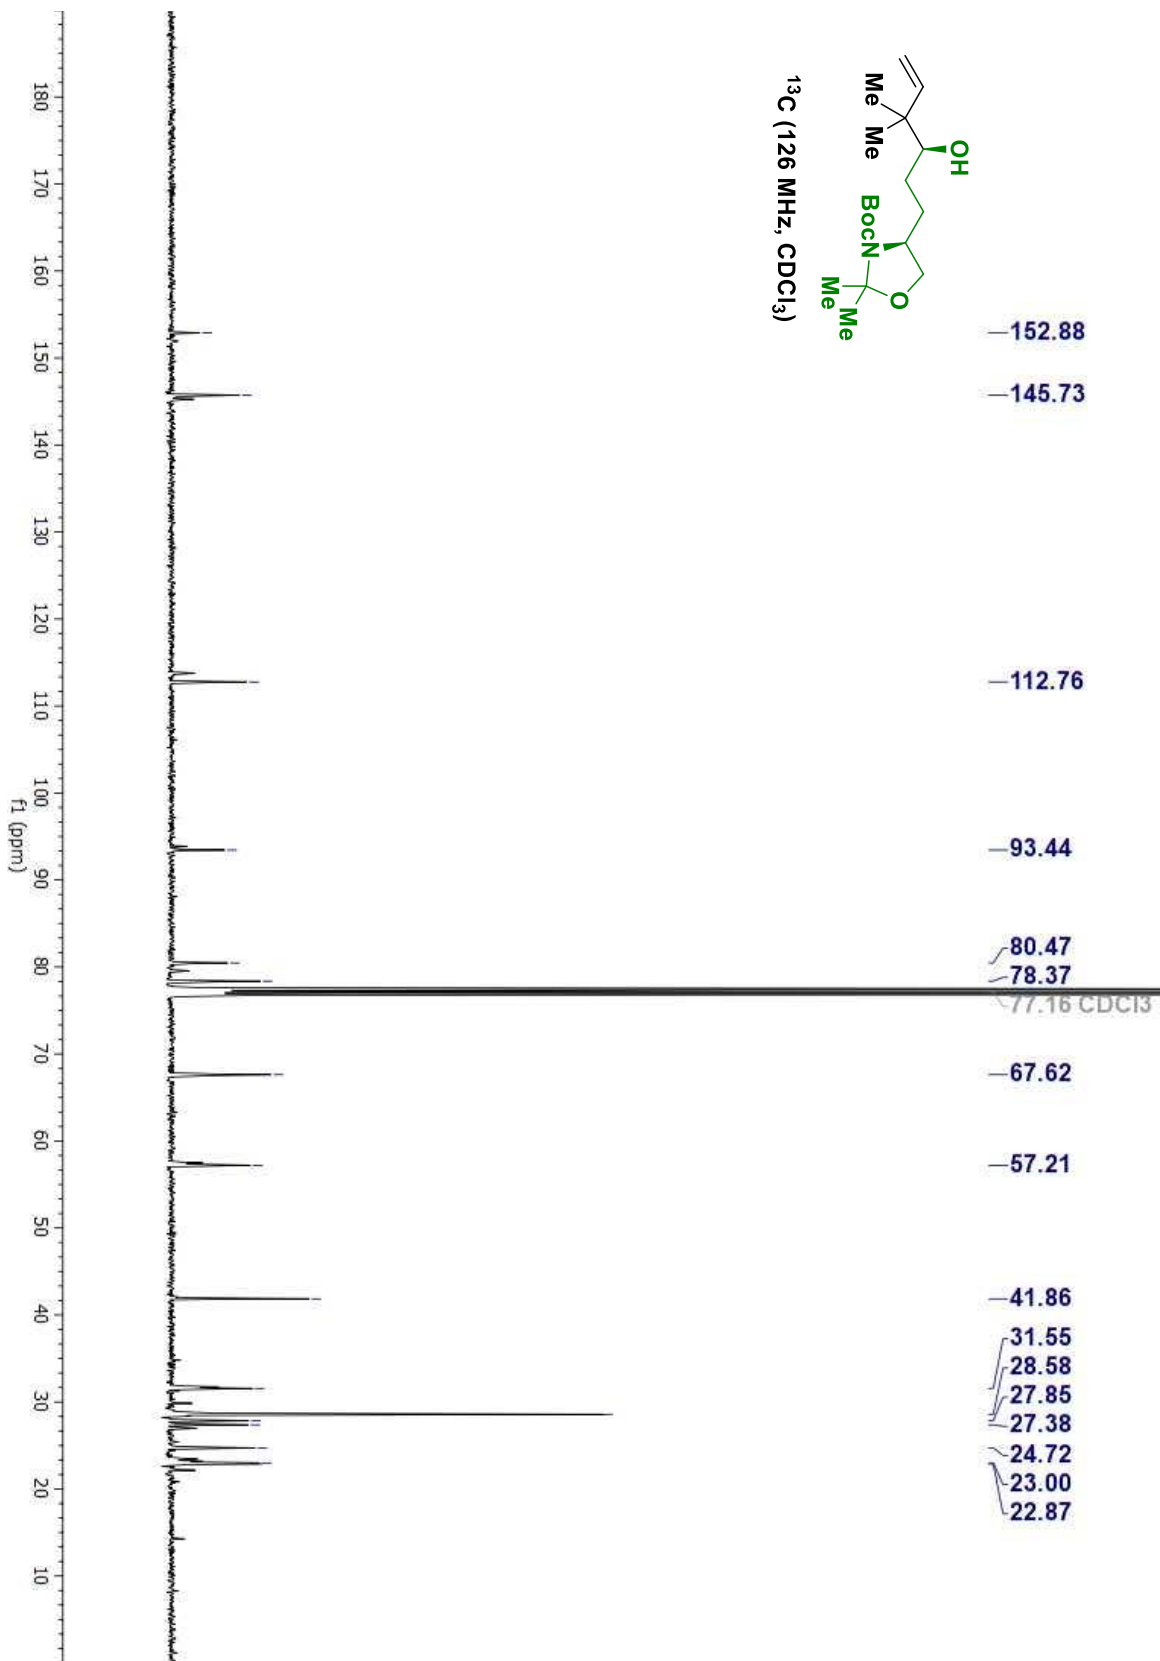



**(4*S*,5*R*)-1-(benzyloxy)-5,9-dimethyl-5-vinyldec-8-en-4-ol (4a)**

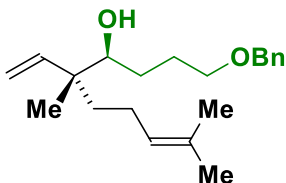

An oven-dried pressure tube equipped with a magnetic stir bar under an argon atmosphere, charged with alcohol **2a** (36.0 mg, 0.2 mmol, 100 mol%), RuHCl(CO)(PPh<sub>3</sub>)<sub>3</sub> (14.3 mg, 0.02 mmol, 7.5 mol%), (**S**)-**DM-SEGP**HOS (10.8 mg, 0.02 mmol, 7.5 mol%), LiI (4.0 mg, 0.03 mmol, 15 mol%) and trifluoroethanol (43  $\mu$ L, 0.6 mmol, 300 mol%), was added MTBE (0.4 mL, 0.5 M) and myrcene **1b** (86  $\mu$ L, 0.5 mmol, 250 mol%). The tube was sealed with a PTFE lined cap, the reaction vessel was placed in a 115 °C oil bath and was allowed to stir for 48 hours, at which point the reaction vessel was removed from the oil bath and the reaction mixture was allowed to reach ambient temperature. The solvent was removed *in vacuo* and the residue was subjected to flash column chromatography (SiO<sub>2</sub>: 8:92 EtOAc:hexanes) to furnish the title compound **4a** as a yellow oil in 56% yield (35.3 mg, 0.11 mmol, 5:1 rr, 86% ee, >20:1 dr).

**TLC (SiO<sub>2</sub>):** R<sub>f</sub> = 0.4 (2:3 EtOAc:Hexanes).

**<sup>1</sup>H NMR** (500 MHz, CDCl<sub>3</sub>):  $\delta$  7.38 – 7.34 (m, 4H), 7.32 – 7.29 (m, 1H), 5.79 (dd, *J* = 17.6, 10.9 Hz, 1H), 5.22 (dd, *J* = 10.9, 1.5 Hz, 1H), 5.11 (t, *J* = 7.2 Hz, 1H), 5.07 (dd, *J* = 17.6, 1.5 Hz, 1H), 4.54 (s, 2H), 3.58 – 3.48 (m, 2H), 3.32 (ddd, *J* = 10.7, 3.7, 1.6 Hz, 1H), 2.02 (d, *J* = 3.7 Hz, 1H), 1.94 (dt, *J* = 12.8, 6.4 Hz, 1H), 1.91 – 1.84 (m, 2H), 1.76 – 1.71 (m, 1H), 1.70 (s, 3H), 1.69 – 1.66 (m, 1H), 1.60 (s, 3H), 1.43 (ddd, *J* = 13.1, 11.6, 5.6 Hz, 1H), 1.39 – 1.27 (m, 2H), 0.99 (s, 3H).

**<sup>13</sup>C NMR** (126 MHz, CDCl<sub>3</sub>):  $\delta$  144.4, 138.6, 131.4, 128.5, 127.8, 127.7, 125.0, 115.0, 73.1, 70.6, 45.1, 37.5, 28.1, 27.4, 25.8, 22.9, 17.8, 17.1.

**HRMS** (H<sup>+</sup>, *m/z*) for C<sub>21</sub>H<sub>32</sub>O<sub>2</sub>: calcd. = 317.2475; found = 317.2487.

**FTIR** (neat): 3030, 2962, 2922, 2854, 1733, 1453, 1361, 1097, 910, 734, 696 cm<sup>-1</sup>.

**HPLC:** (Phenomenex LC Columns Cellulose-2 + Cellulose-5, Hexane: 2-PrOH = 99:01, 0.5 mL/160min, 210 nm).

$[\alpha]_D^{24} = +28.7$  (c = 0.4, CHCl<sub>3</sub>).

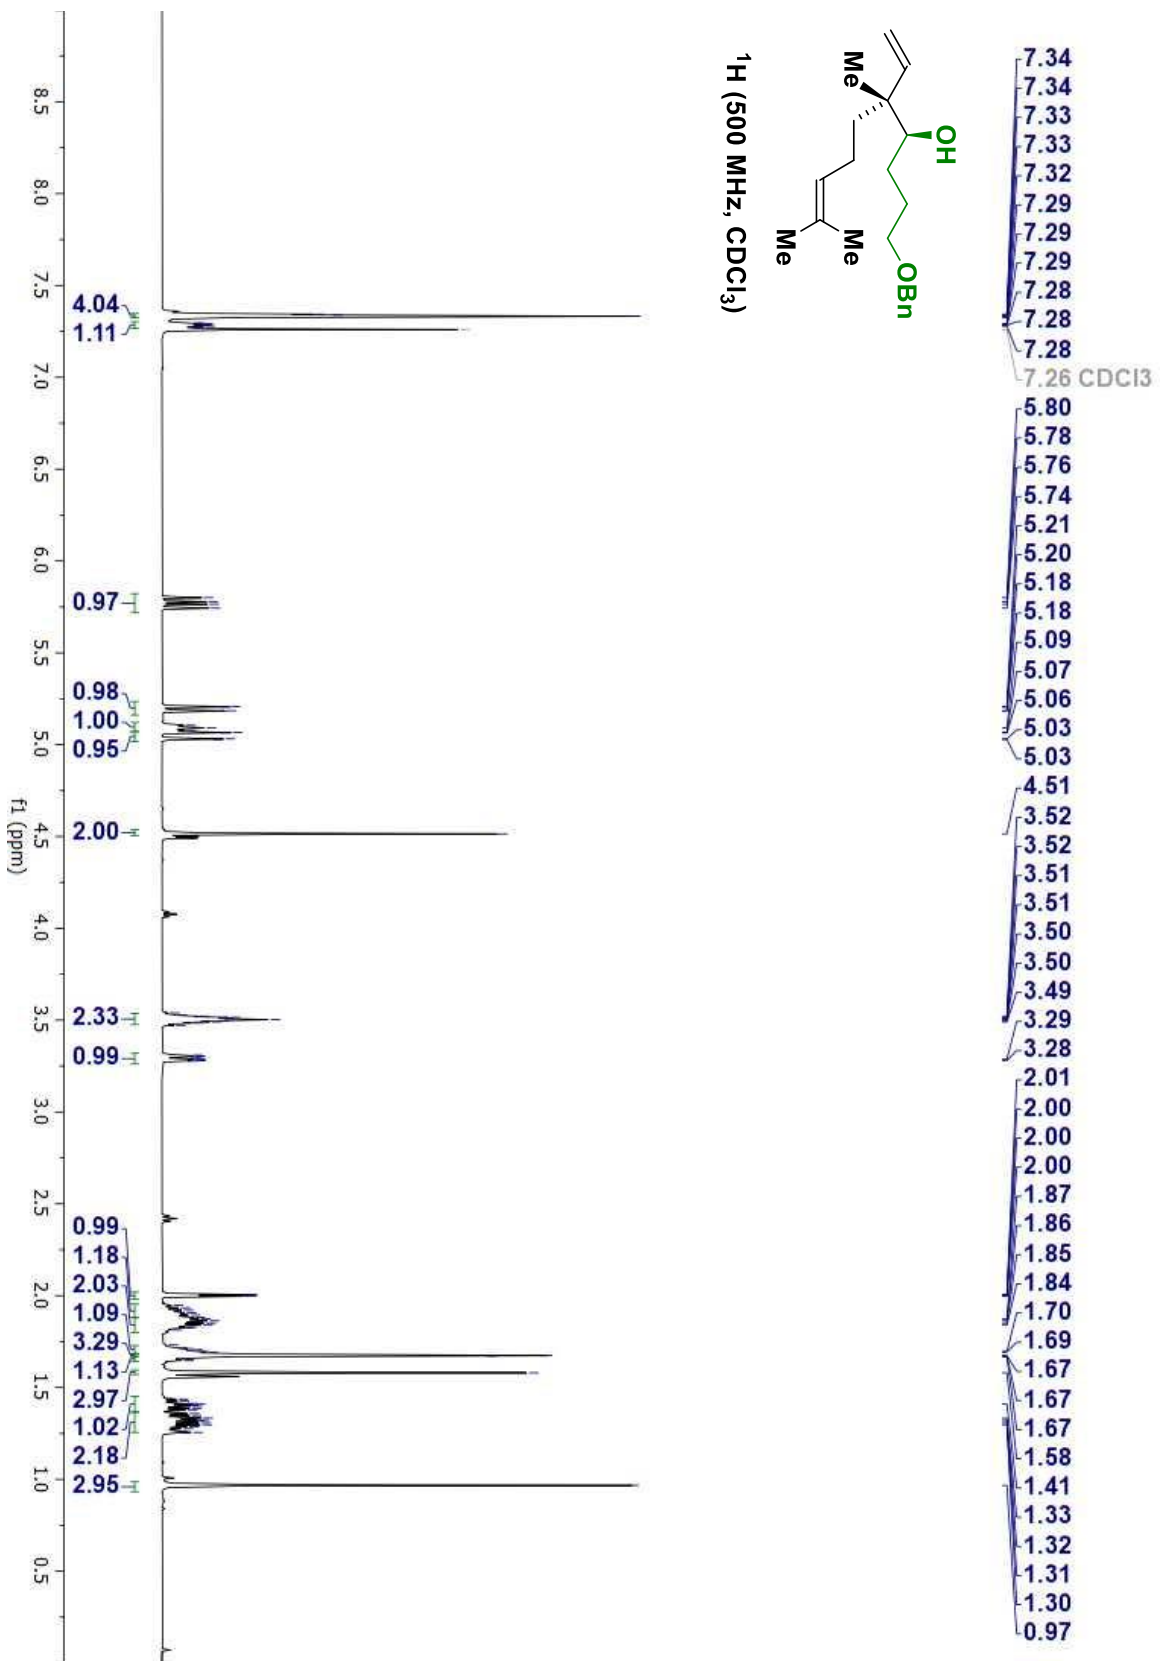

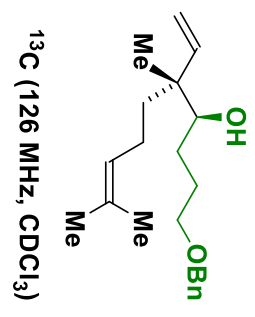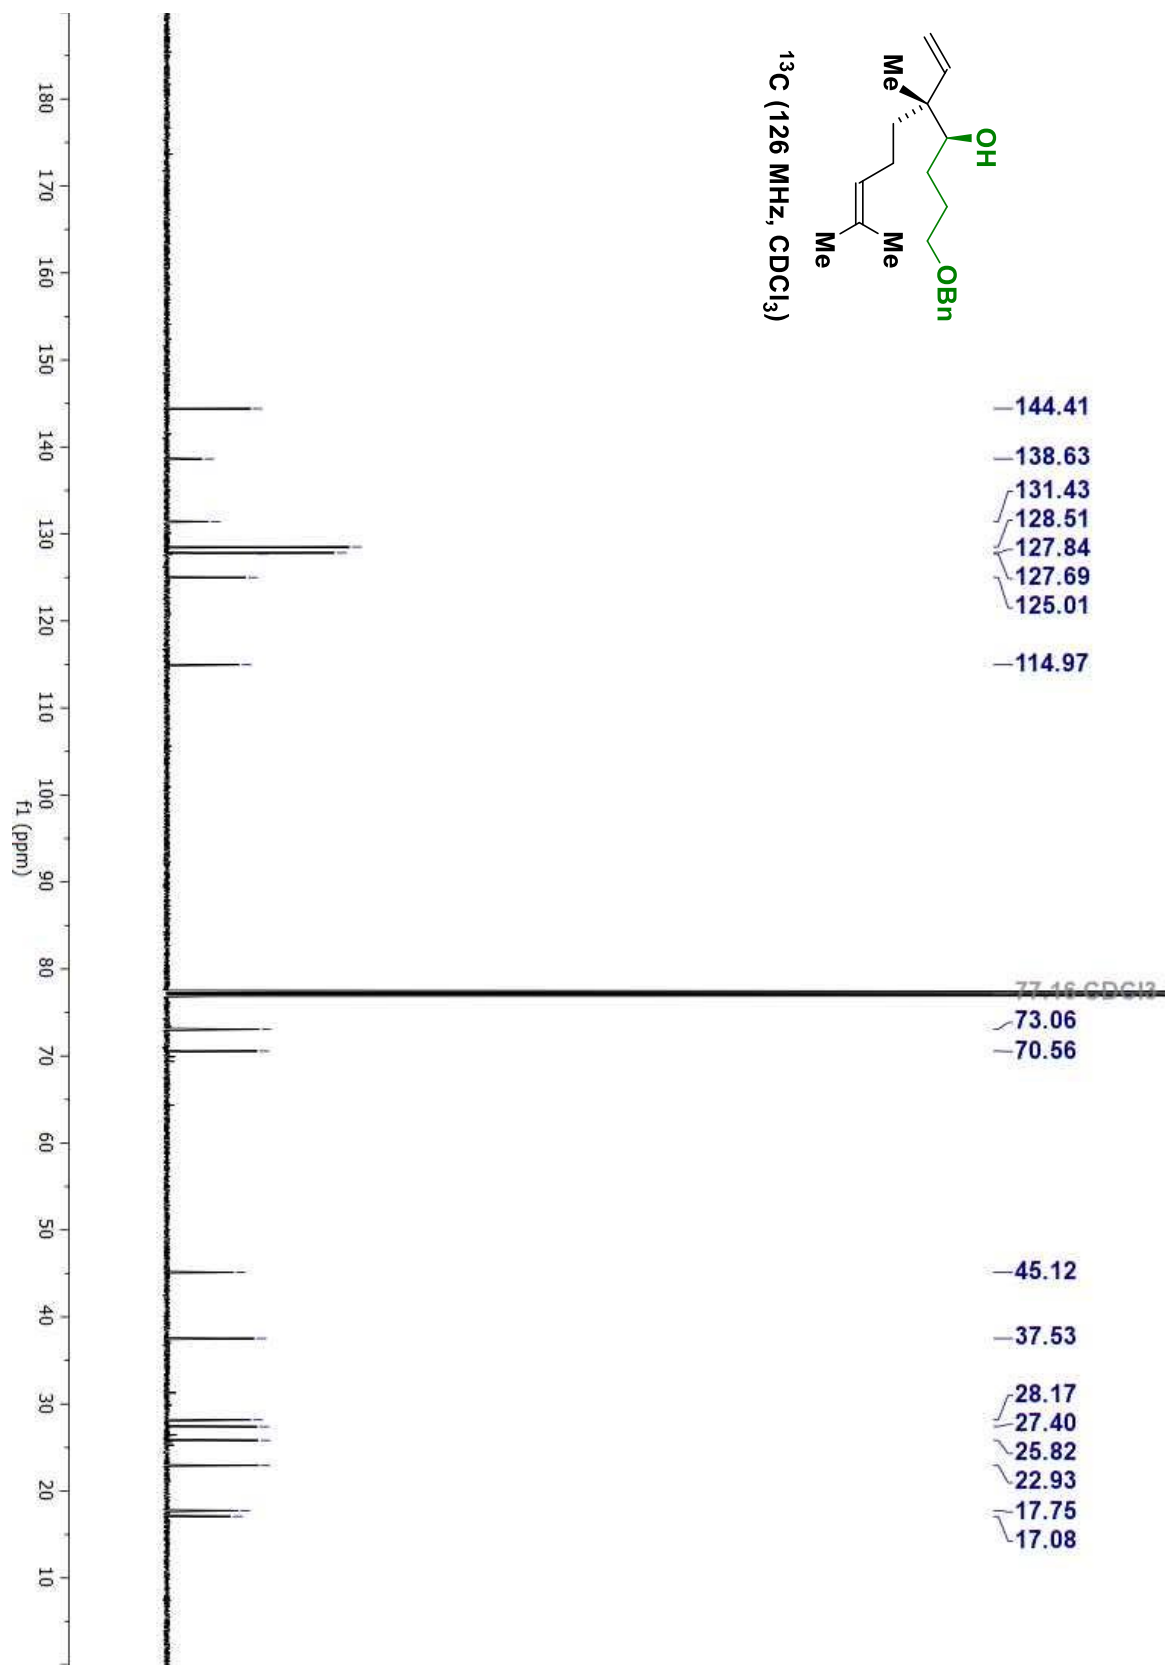

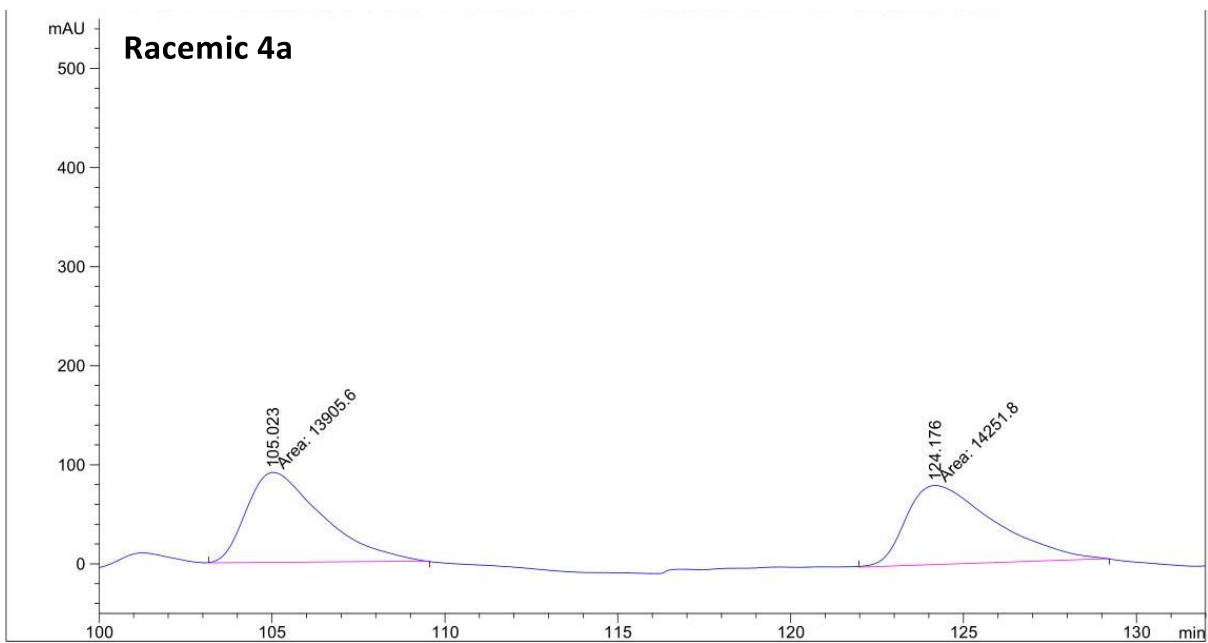

| Peak # | RetTime [min] | Type | Width [min] | Area [mAU*s] | Height [mAU] | Area %  |
|--------|---------------|------|-------------|--------------|--------------|---------|
| 1      | 105.023       | MM   | 2.5492      | 1.39056e4    | 90.91379     | 49.3852 |
| 2      | 124.176       | MM   | 2.9720      | 1.42518e4    | 79.92323     | 50.6148 |

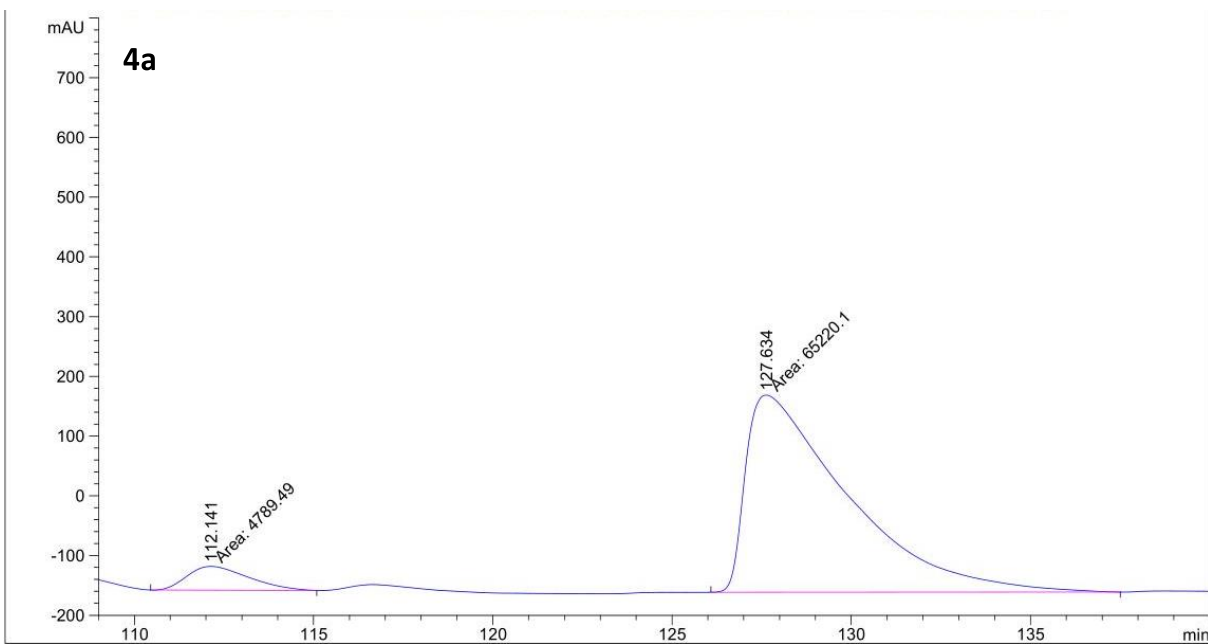

| Peak # | RetTime [min] | Type | Width [min] | Area [mAU*s] | Height [mAU] | Area %  |
|--------|---------------|------|-------------|--------------|--------------|---------|
| 1      | 112.141       | MM   | 1.9922      | 4789.48779   | 40.06916     | 6.8412  |
| 2      | 127.634       | MM   | 3.2932      | 6.52201e4    | 330.07645    | 93.1588 |

**(4S)-7-(benzyloxy)-2,3-dimethylhept-1-en-4-ol (*sec*-3a)**

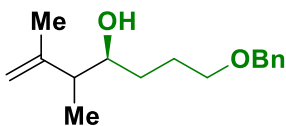

Alcohol **2a** (36.0 mg, 0.2 mmol) was subjected to standard reaction conditions (115 °C, 48 h) without KI. Flash column chromatography (SiO<sub>2</sub>: 8:92 EtOAc:hexanes) provided the title compound *sec*-**3a** as a yellow oil in 74% yield (37.2 mg, 0.15 mmol, 1:16 rr, 11% ee, 3:1 dr).

**TLC** (SiO<sub>2</sub>): R<sub>f</sub> = 0.5 (1:3 EtOAc:hexanes).

**<sup>1</sup>H NMR** (400 MHz, C<sub>6</sub>D<sub>6</sub>): δ 7.31 – 7.26 (m, 2H), 7.18 (d, *J* = 7.8 Hz, 2H), 7.12 – 7.06 (m, 1H), 4.76 (d, *J* = 1.6 Hz, 2H), 4.30 (s, 2H), 3.43 (ddt, *J* = 9.3, 6.1, 3.3 Hz, 1H), 3.31 (dd, *J* = 4.6, 2.1 Hz, 1H), 3.29 (dt, *J* = 5.8, 2.1 Hz, 1H), 2.06 (p, *J* = 6.8 Hz, 1H), 1.83 – 1.72 (m, 1H), 1.72 – 1.59 (m, 2H), 1.57 (s, 3H), 1.49 – 1.33 (m, 1H), 1.09 (d, *J* = 6.9 Hz, 3H).

**<sup>13</sup>C NMR** (101 MHz, C<sub>6</sub>D<sub>6</sub>): δ 148.7, 139.2, 128.6, 127.7, 111.4, 73.1, 72.9, 70.7, 47.5, 32.7, 27.1, 20.8, 14.6.

**HRMS** (Na<sup>+</sup>, *m/z*) for C<sub>16</sub>H<sub>24</sub>O<sub>2</sub>: calcd. = 271.1669; found = 271.1673.

**FTIR** (neat): 3030, 2919, 2856, 1644, 1453, 1363, 1096, 966, 910, 734, 697 cm<sup>-1</sup>.

**HPLC**: (Chiralcel columns Amylose 3-1 + Amylose 3-2, Hexane:2-PrOH = 99:01, 0.5 mL/min, 210 nm).

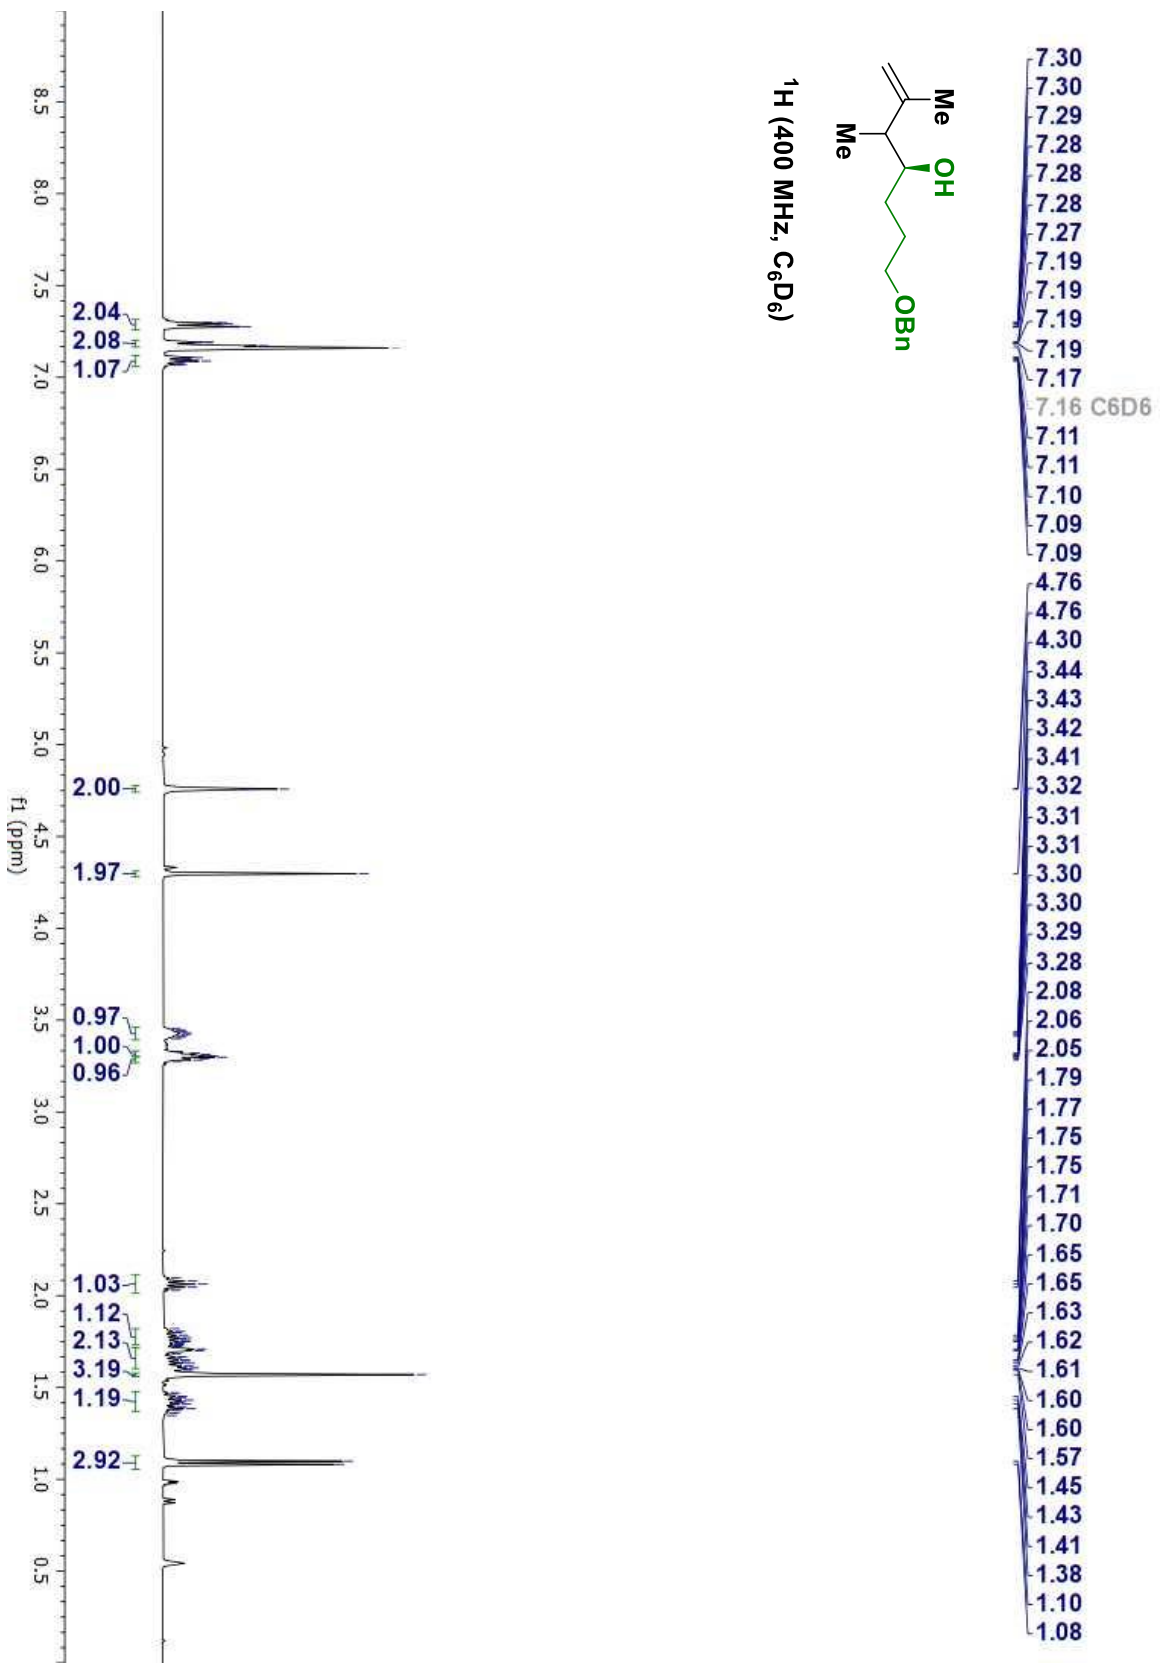

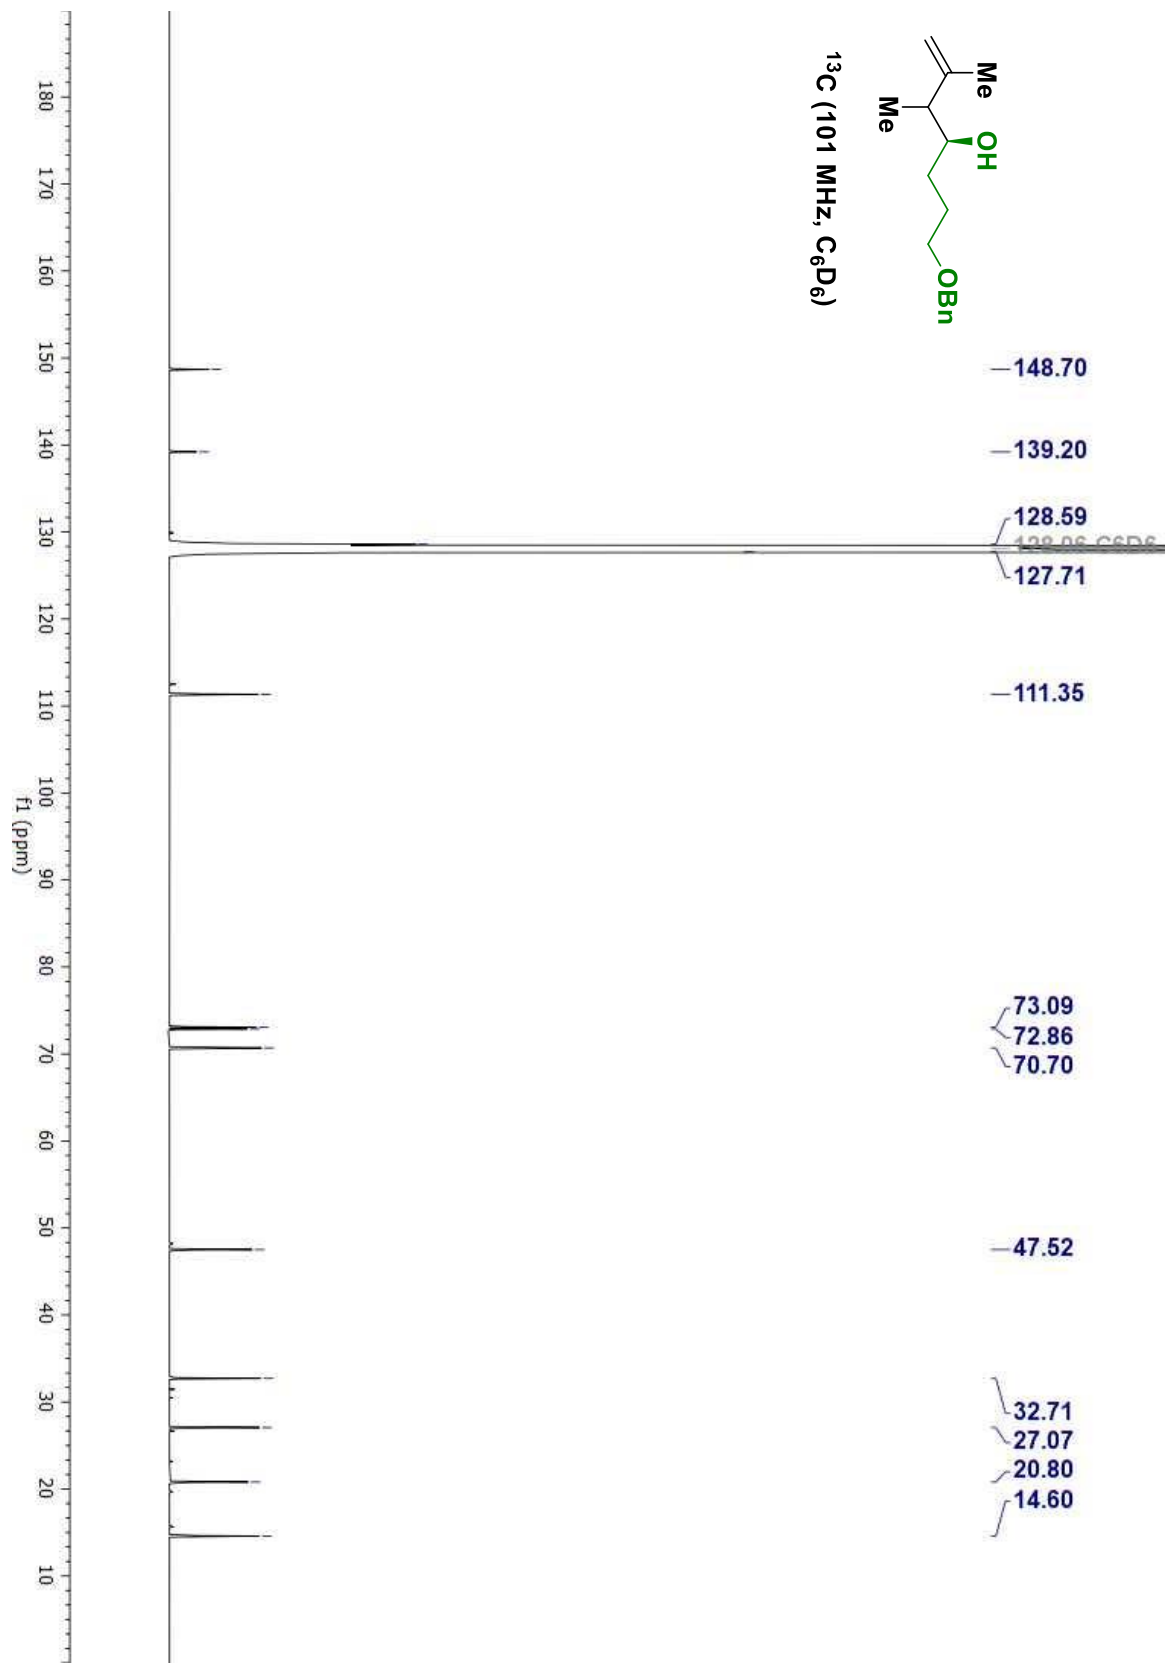

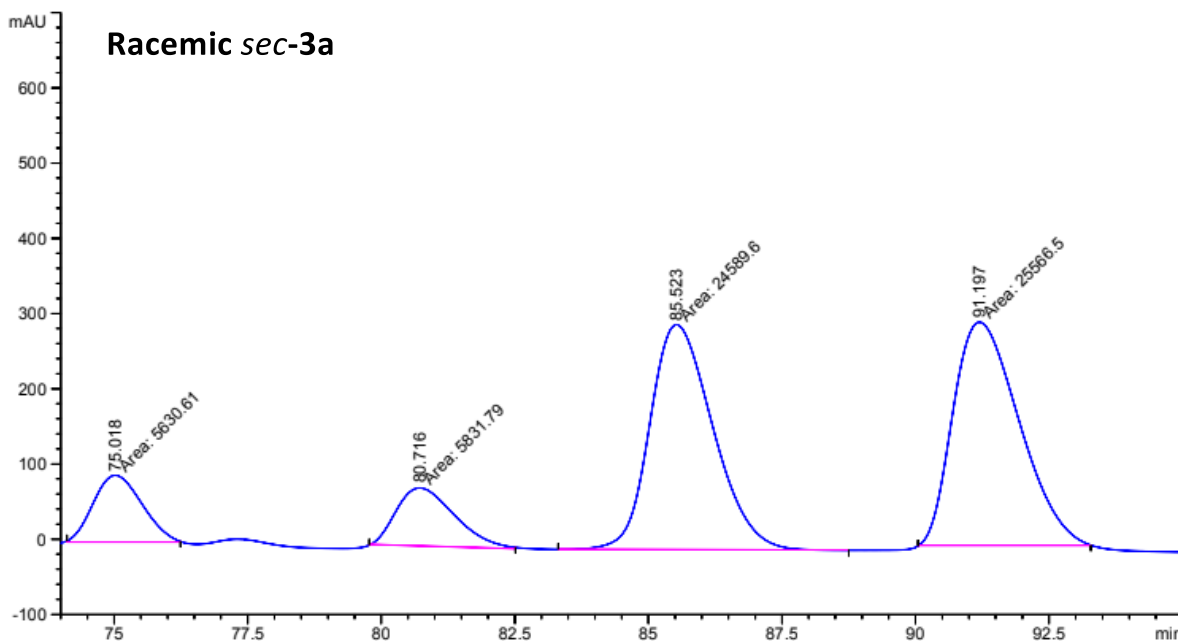

| Peak # | RetTime [min] | Type | Width [min] | Area [mAU*s] | Height [mAU] | Area %  |
|--------|---------------|------|-------------|--------------|--------------|---------|
| 1      | 75.018        | MM   | 1.0551      | 5630.60547   | 88.94267     | 9.1379  |
| 2      | 80.716        | MM   | 1.2604      | 5831.79492   | 77.11305     | 9.4644  |
| 3      | 85.523        | MM   | 1.3695      | 2.45896e4    | 299.26282    | 39.9062 |
| 4      | 91.197        | MM   | 1.4345      | 2.55665e4    | 297.04886    | 41.4916 |

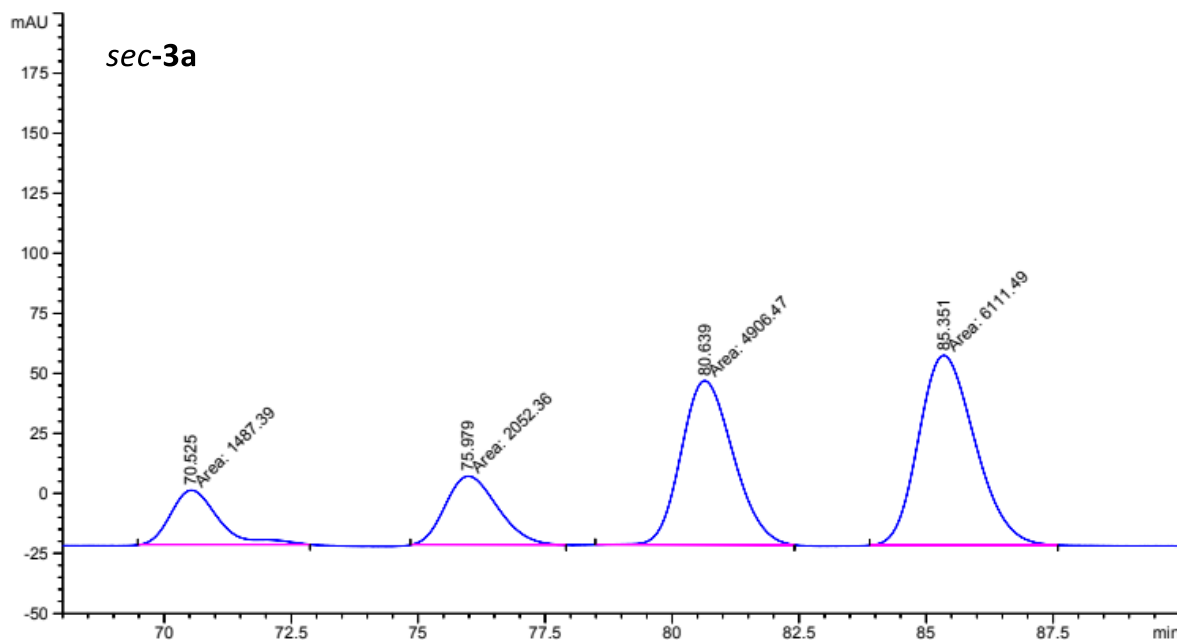

| Peak # | RetTime [min] | Type | Width [min] | Area [mAU*s] | Height [mAU] | Area %  |
|--------|---------------|------|-------------|--------------|--------------|---------|
| 1      | 70.525        | MM   | 1.0953      | 1487.38940   | 22.63306     | 10.2172 |
| 2      | 75.979        | MM   | 1.1953      | 2052.36035   | 28.61818     | 14.0981 |
| 3      | 80.639        | MM   | 1.1954      | 4906.46826   | 68.40901     | 33.7036 |
| 4      | 85.351        | MM   | 1.2882      | 6111.49170   | 79.06740     | 41.9811 |



## Deuterium Labeling Studies

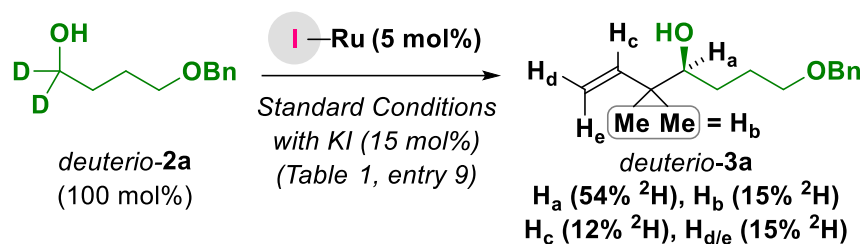

Alcohol *deuterio-2a* (36.5 mg, 0.2 mmol) was subjected to standard reaction conditions (115 °C, 48 h). Flash column chromatography (SiO<sub>2</sub>: 7:93 EtOAc:hexanes) provided the title compound *deuterio-3a* as a yellow oil in 36% yield (18.0 mg, 0.07 mmol).

<sup>1</sup>H NMR (400 MHz, CDCl<sub>3</sub>): δ 7.38 – 7.27 (m, 5H), 5.84 (dd, *J* = 17.5, 10.8 Hz, 0.88H), 5.10 – 4.99 (m, 1.85H), 4.52 (s, 2H), 3.51 (t, *J* = 6.0 Hz, 2H), 3.27 (ddd, *J* = 10.6, 4.6, 1.7 Hz, 0.46H), 2.07 – 1.99 (m, 1H), 1.92 – 1.78 (m, 1H), 1.69 (ddt, *J* = 12.5, 6.7, 2.6 Hz, 2H), 1.34 – 1.23 (m, 1H), 1.01 (s, 5.85H).

<sup>2</sup>H NMR (92 MHz, CHCl<sub>3</sub>): δ 5.88 (s, 0.12H), 5.09 (s, 0.15H), 3.26 (s, 0.54H), 1.02 (s, 0.15H).

HRMS (Na<sup>+</sup>, *m/z*) for C<sub>16</sub>H<sub>23</sub>DO<sub>2</sub>: calcd. = 249.1832; found = 272.1741.

(Na<sup>+</sup>, *m/z*) for C<sub>16</sub>H<sub>22</sub>D<sub>2</sub>O<sub>2</sub>: calcd. = 250.1902; found = 273.1799.

(Na<sup>+</sup>, *m/z*) for C<sub>16</sub>H<sub>21</sub>D<sub>3</sub>O<sub>2</sub>: calcd. = 251.1965; found = 274.1859.

(Na<sup>+</sup>, *m/z*) for C<sub>16</sub>H<sub>20</sub>D<sub>4</sub>O<sub>2</sub>: calcd. = 252.2027; found = 275.1924.

(Na<sup>+</sup>, *m/z*) for C<sub>16</sub>H<sub>19</sub>D<sub>5</sub>O<sub>2</sub>: calcd. = 253.2090; found = 276.1981.

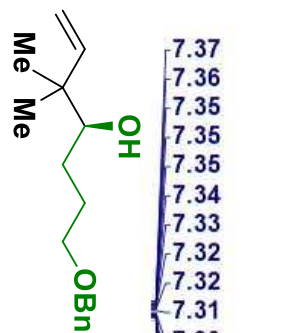

$^1\text{H}$  (400 MHz,  $\text{CDCl}_3$ )

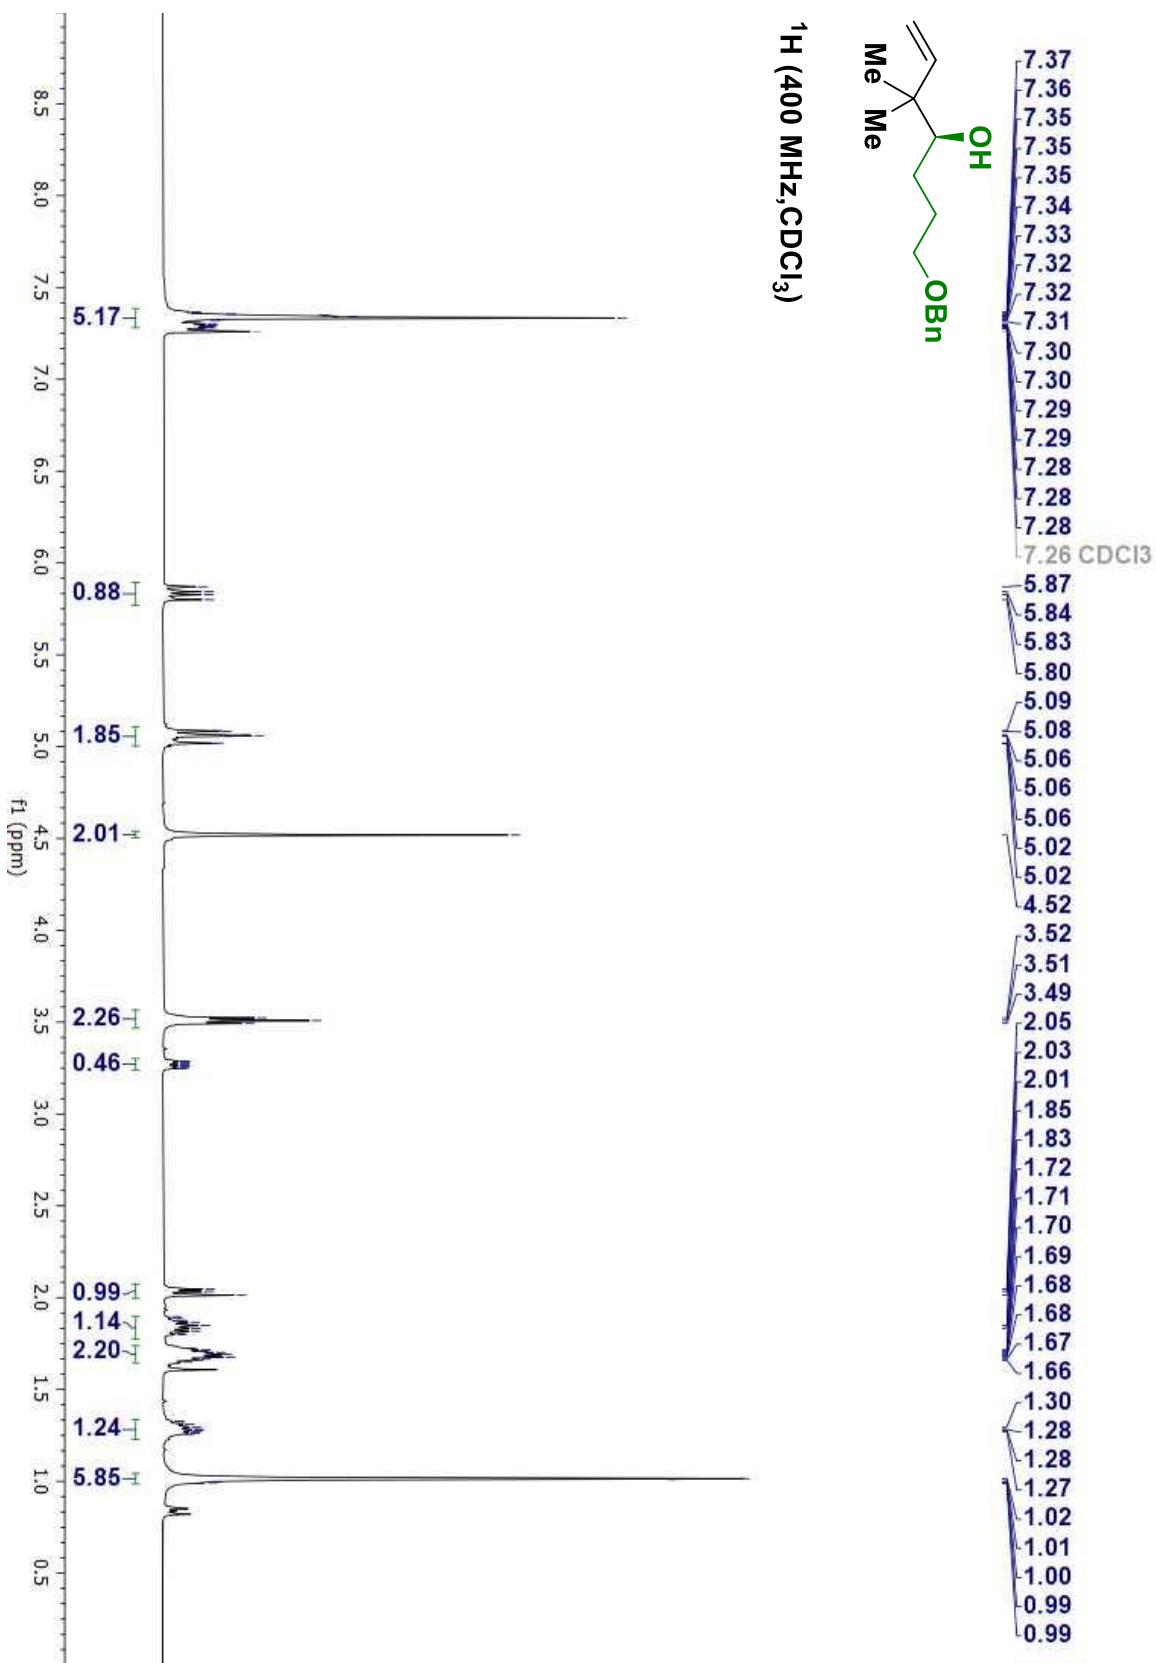

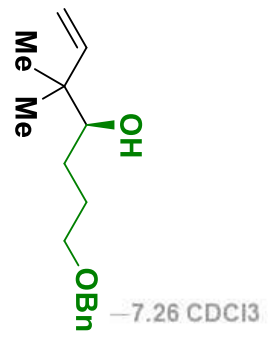

<sup>2</sup>H (92 MHz, CHCl<sub>3</sub>)

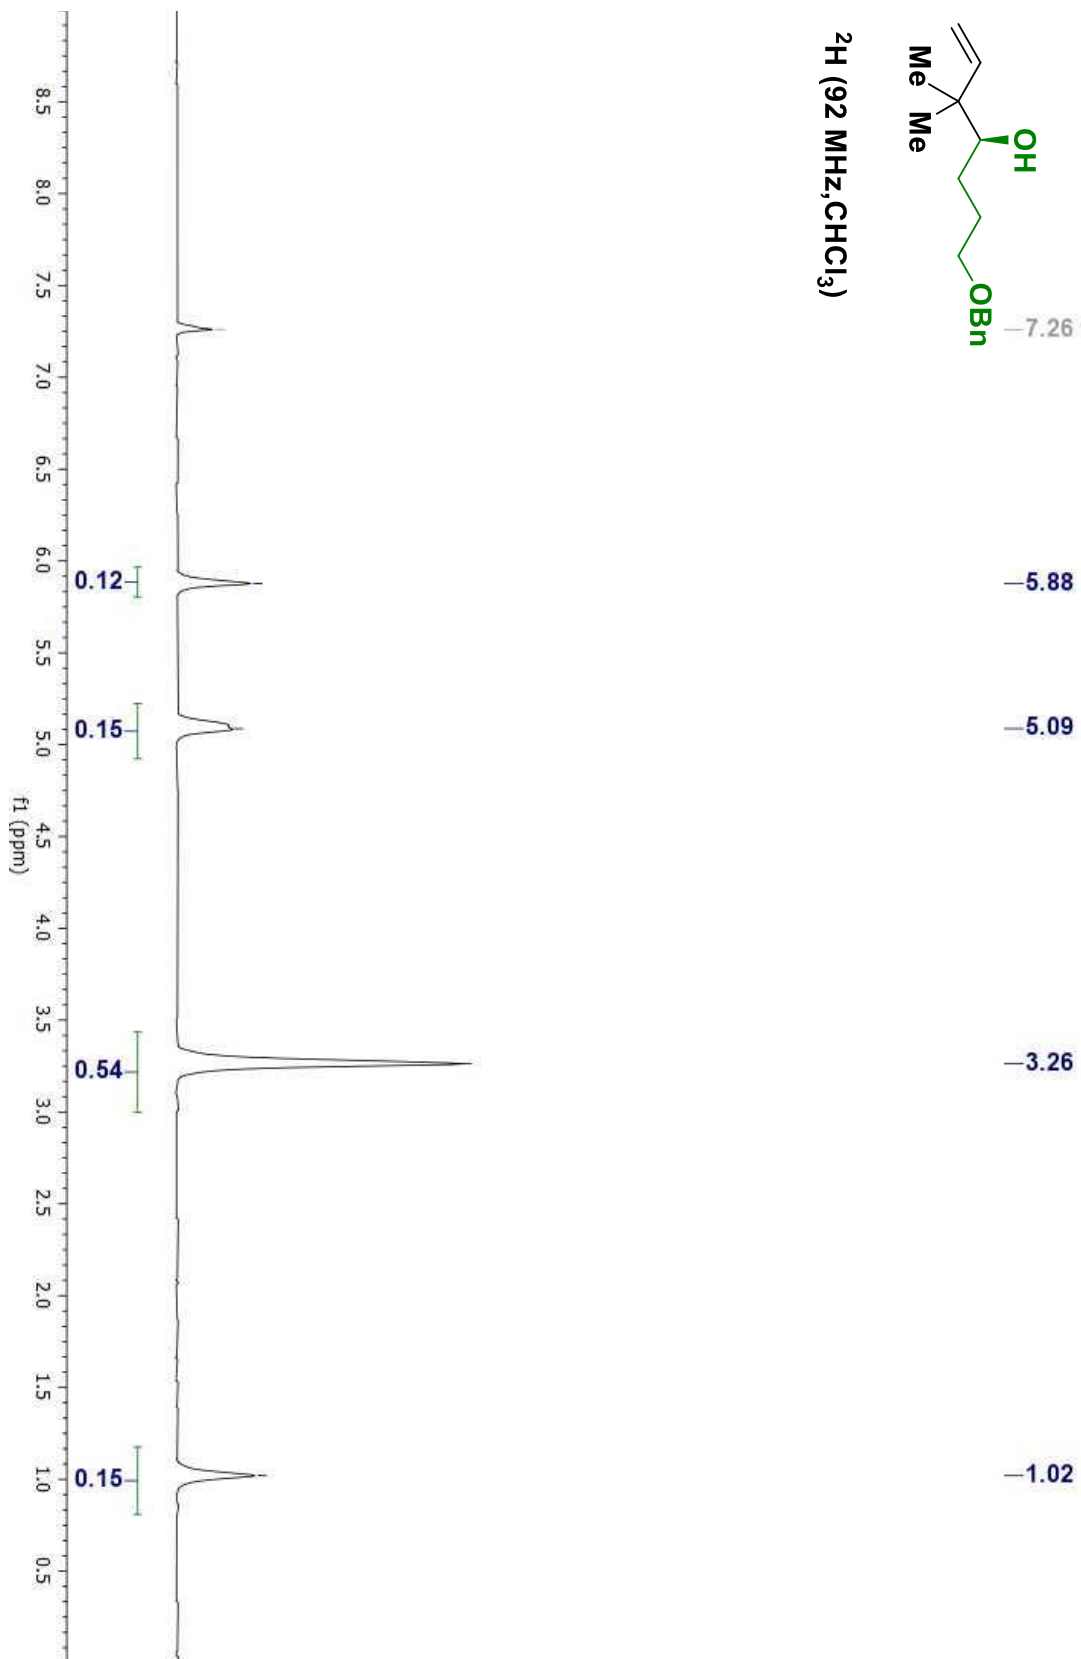

## Deuterium Labeling Study

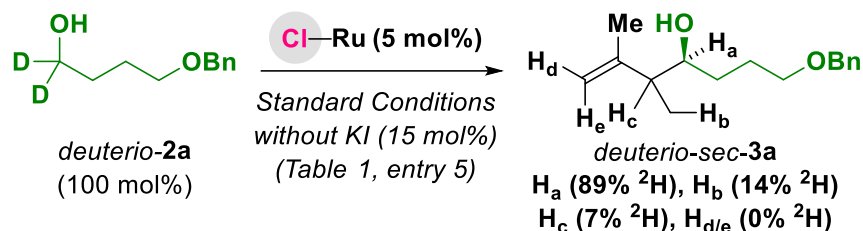

Alcohol *deuterio-2a* (36.5 mg, 0.2 mmol) was subjected to standard reaction conditions (115 °C, 48 h) without KI. Flash column chromatography (SiO<sub>2</sub>: 7:93 EtOAc:hexanes) provided the title compound *deuterio-sec-3a* as a yellow oil in 50% yield (26.0 mg, 0.10 mmol).

**<sup>1</sup>H NMR** (400 MHz, C<sub>6</sub>D<sub>6</sub>): 7.34 – 7.25 (m, 2H), 7.18 (d, *J* = 7.5 Hz, 2H), 7.12 – 7.06 (m, 1H), 4.76 (d, *J* = 1.5 Hz, 2H), 4.30 (s, 2H), 3.42 (m, *J* = 7.8 Hz, 0.11H), 3.31 (dd, *J* = 6.9, 4.4 Hz, 1H), 3.29 (dd, *J* = 6.9, 2.4 Hz, 1H), 2.06 (q, *J* = 6.9 Hz, 0.93H), 1.81 – 1.72 (m, 1H), 1.72 – 1.59 (m, 2H), 1.57 (s, 3H), 1.42 (dt, *J* = 13.8, 6.9 Hz, 1H), 1.09 (d, *J* = 6.9 Hz, 2.86H).

**<sup>2</sup>H NMR** (92 MHz, C<sub>6</sub>D<sub>6</sub>): δ 5.88 (s, 0.12H), 5.09 (s, 0.15H), 3.26 (s, 0.54H), 1.02 (s, 0.15H).

**HRMS** (Na<sup>+</sup>, *m/z*) for C<sub>16</sub>H<sub>23</sub>DO<sub>2</sub>: calcd. = 249.1832; found = 272.1730.

(Na<sup>+</sup>, *m/z*) for C<sub>16</sub>H<sub>22</sub>D<sub>2</sub>O<sub>2</sub>: calcd. = 250.1902; found = 273.1782.

(Na<sup>+</sup>, *m/z*) for C<sub>16</sub>H<sub>21</sub>D<sub>3</sub>O<sub>2</sub>: calcd. = 251.1965; found = 274.1836.

(Na<sup>+</sup>, *m/z*) for C<sub>16</sub>H<sub>20</sub>D<sub>4</sub>O<sub>2</sub>: calcd. = 252.2027; found = 275.1869.

(Na<sup>+</sup>, *m/z*) for C<sub>16</sub>H<sub>19</sub>D<sub>5</sub>O<sub>2</sub>: calcd. = 253.2090; found = 276.1879.

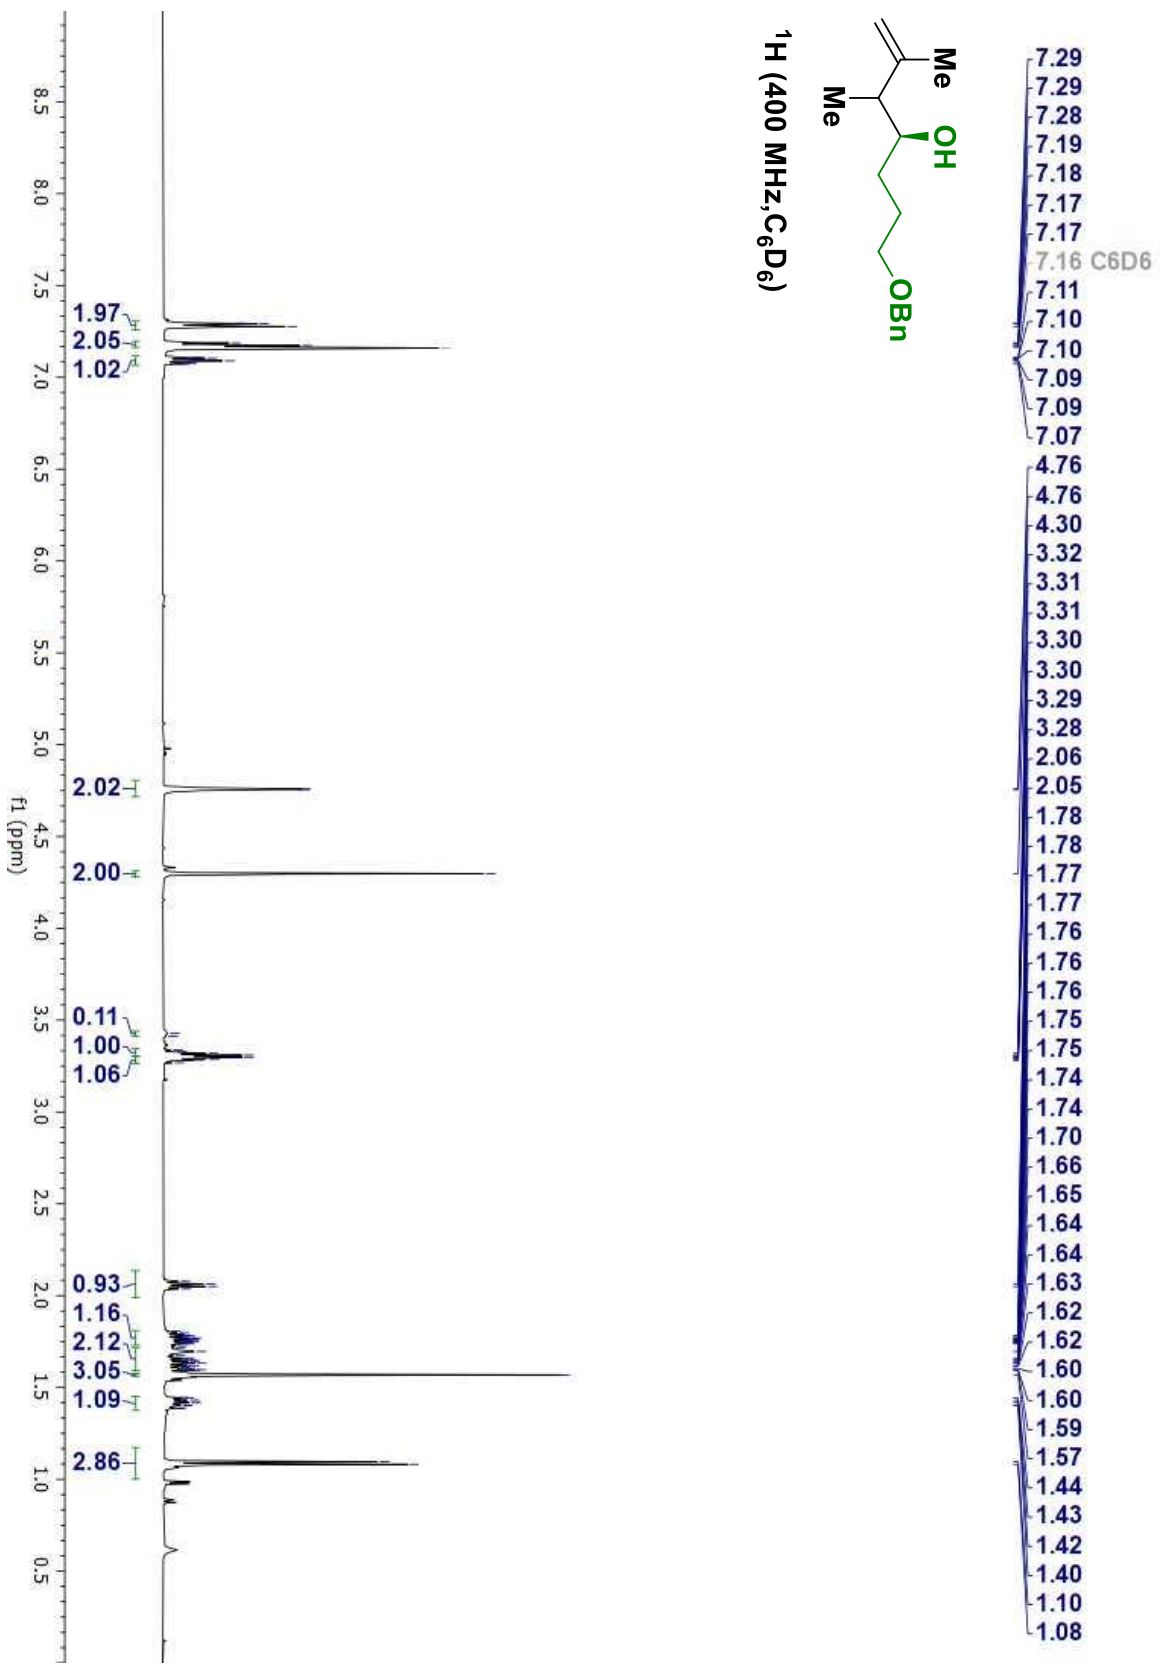

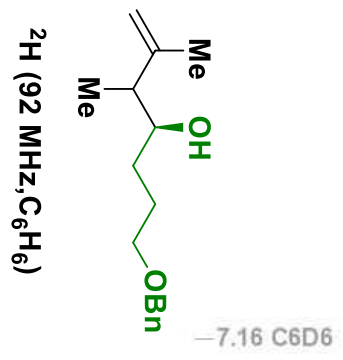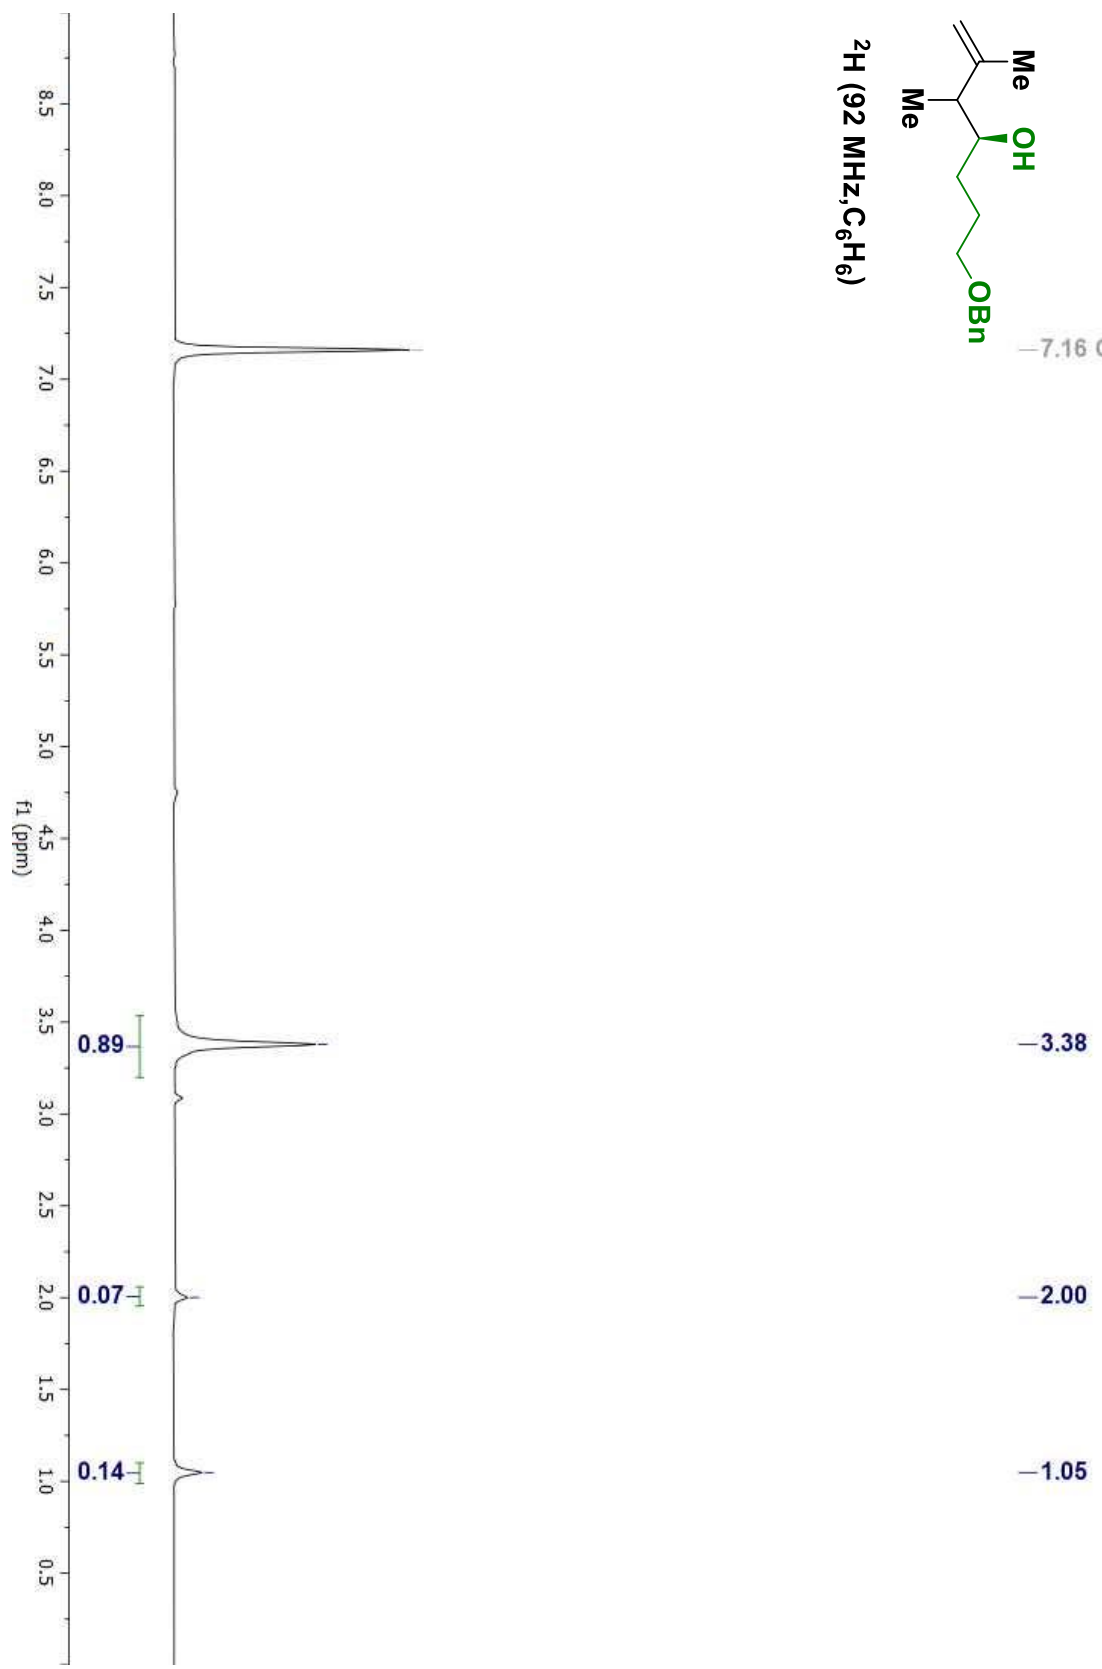

## Ruthenium Chloride Complex

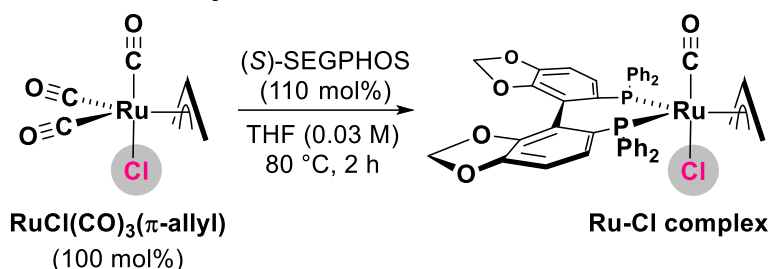

To a dried pressure tube equipped with a magnetic stir bar under an argon atmosphere charged with  $\text{RuCl(CO)}_3(\pi\text{-allyl})$  complex (14 mg, 0.06 mmol) and  $(S)\text{-SEGPHOS}$  (37 mg, 0.06 mmol) was added THF (2 mL, 0.03 M). The pressure tube was backfilled with argon, sealed with a PTFE lined cap. The reaction vessel was placed in an oil bath at  $80\text{ }^\circ\text{C}$  and the reaction mixture was allowed to stir for 2 hours. The reaction vessel was removed from the oil bath and the reaction mixture was allowed to reach ambient temperature. The pressure tube was opened and the reaction mixture was transferred to a 10 mL round bottom flask with the aid of THF. The solution was triturated with hexanes (5 mL) and filtered through a Hirsch funnel to afford the  $\text{Ru-Cl complex}$  as an off-white solid in 85% yield (41.6 mg, 0.05 mmol).

$^{31}\text{P}\{^1\text{H}\}$  NMR (202 MHz,  $\text{C}_6\text{D}_6$ ):  $\delta$  33.3 (d,  $J = 4.1$  Hz), 31.7 (d,  $J = 4.1$  Hz).

Solid State  $^{31}\text{P}$  NMR (162 MHz, 12 kHz, 3.5 ms):  $\delta$  33.3 (broad), 26.7 (broad).

HRMS ( $\text{Na}^+$ ,  $m/z$ ) for  $\text{C}_{42}\text{H}_{33}\text{ClO}_5\text{P}_2\text{Ru}$ : calcd. = 839.0436; found = 839.0458.

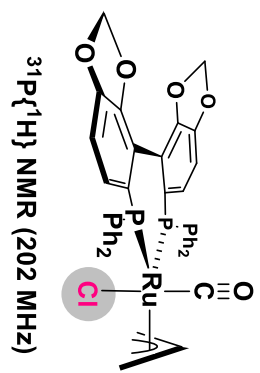

33.30  
33.28  
31.75  
31.73

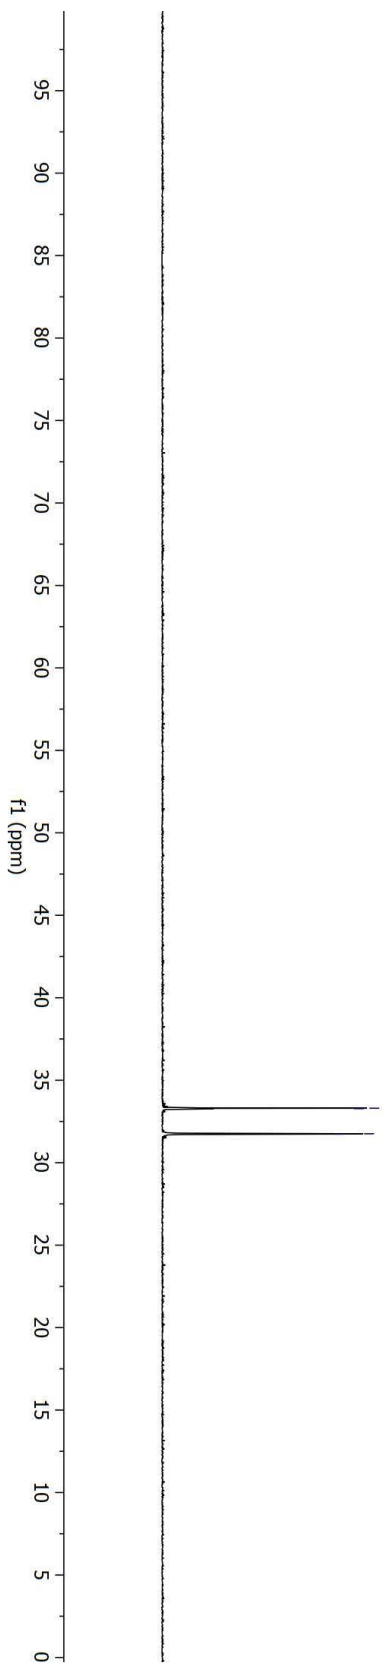



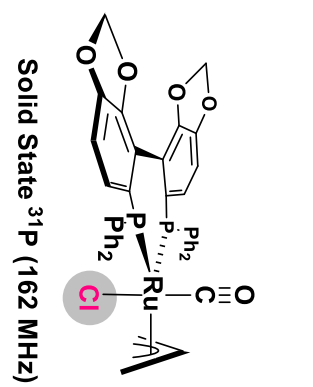

-33.30

-26.70

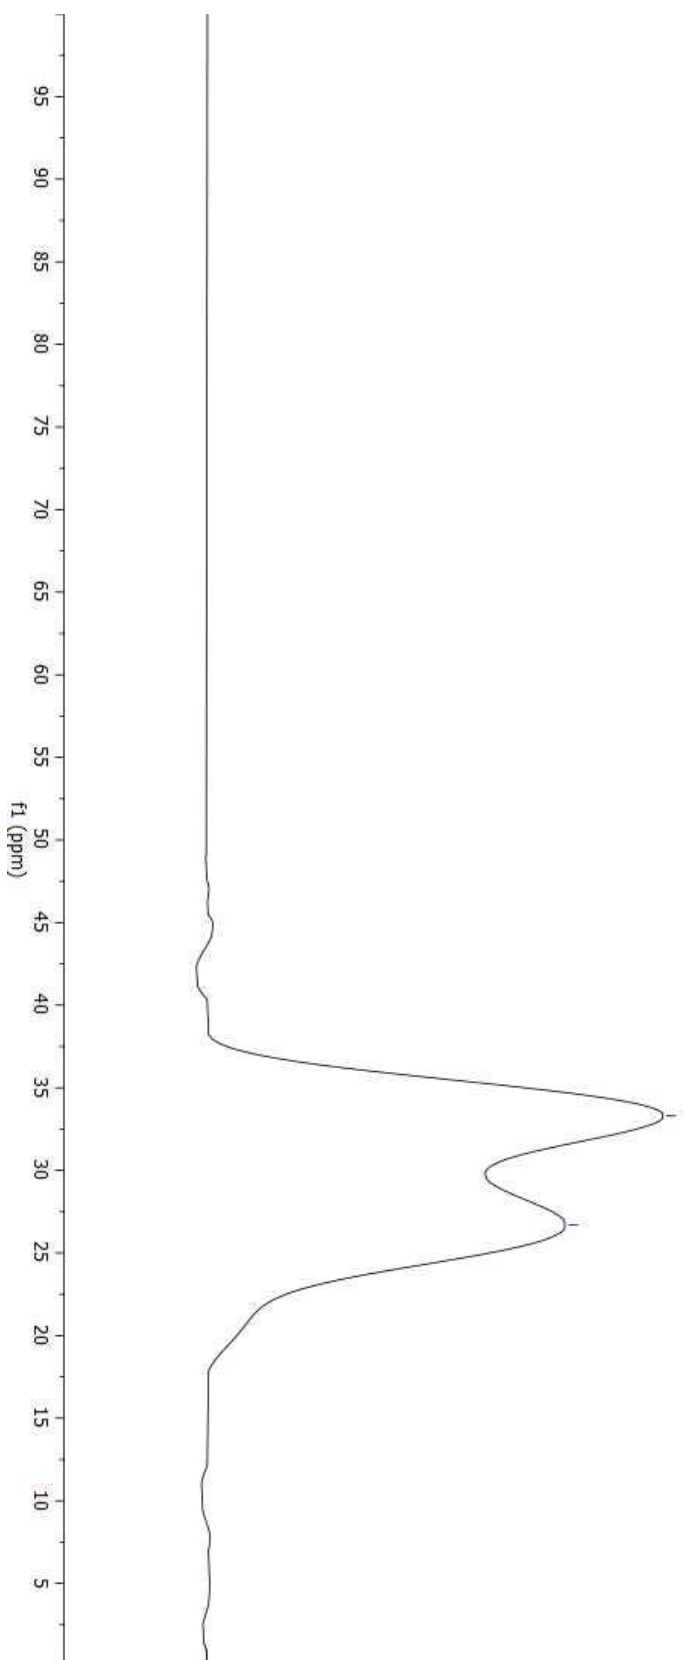

## Ruthenium Iodide Complex

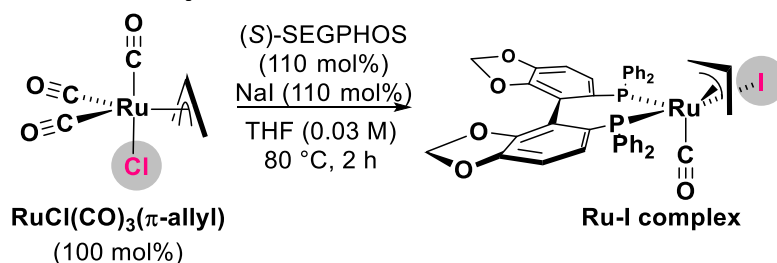

To a dried pressure tube equipped with a magnetic stir bar under an argon atmosphere charged with  $\text{RuCl(CO)}_3(\pi\text{-allyl})$  complex (14 mg, 0.06 mmol), (S)-SEGPHOS (37 mg, 0.06 mmol), and NaI (9 mg, 0.06 mmol), was added THF (2 mL, 0.03 M). The pressure tube was backfilled with argon, sealed with a PTFE lined cap. The reaction vessel was placed in an oil bath at 80 °C and the reaction mixture was allowed to stir for 2 hours. The reaction vessel was removed from the oil bath and the reaction mixture was allowed to reach ambient temperature. The pressure tube was opened, and the reaction solution was transferred to a 10 mL round bottom flask with the aid of THF. The solution was triturated with hexanes (5 mL) and filtered through a Hirsch funnel to afford the Ru-I complex as a yellow solid in 82% Yield (44.8 mg, 0.05 mmol).

$^{31}\text{P}\{^1\text{H}\}$  NMR (202 MHz,  $\text{C}_6\text{D}_6$ ):  $\delta$  48.7 (d,  $J = 25.1$  Hz), 32.7 (d,  $J = 25.2$  Hz).

Solid State  $^{31}\text{P}$  NMR (162 MHz, 12 kHz, 3.5 ms):  $\delta$  48.6 (broad), 32.0 (broad).

HRMS ( $\text{K}^+$ ,  $m/z$ ) for  $\text{C}_{42}\text{H}_{33}\text{IO}_5\text{P}_2\text{Ru}$ : calcd. = 946.9534; found = 946.9544.

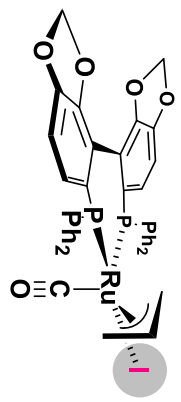

$^{31}\text{P}\{^1\text{H}\}$  NMR (202 MHz)

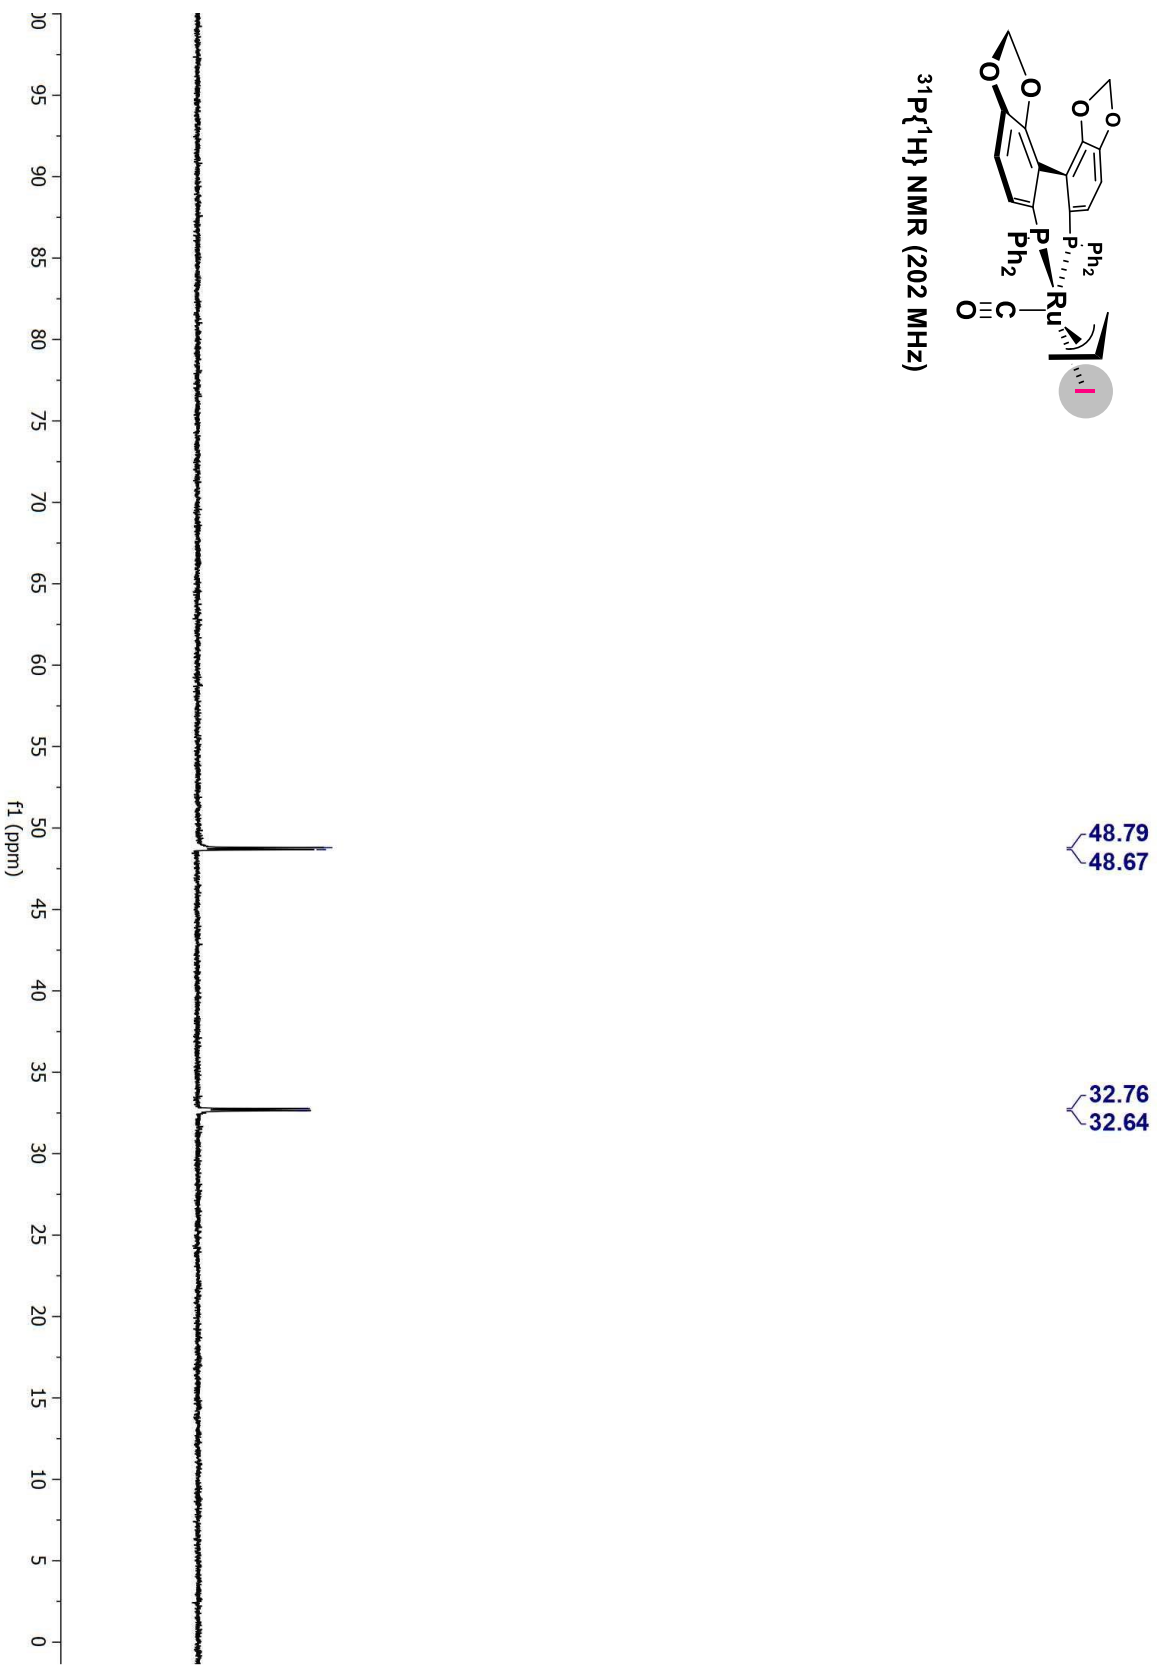

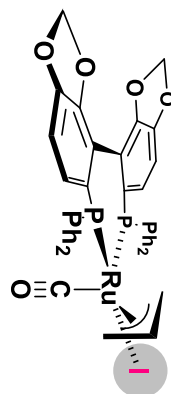

Solid State <sup>31</sup>P (162 MHz)

—48.64

—32.01

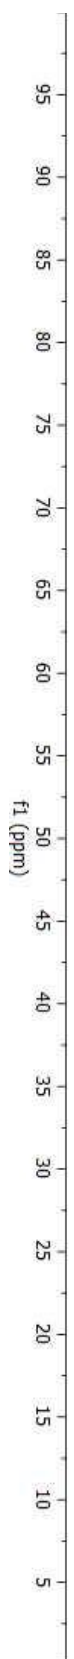

## Single Crystal Diffraction Data for Coupling Product 3e

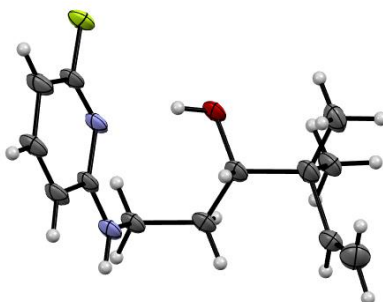

Crystals grew as clusters of colorless needles by vapor diffusion of n-pentane into a diethyl ether solution. The data crystal was cut from a longer crystal and had approximate dimensions; 0.28 x 0.081 x 0.075 mm. The data were collected on a Rigaku Oxford Diffraction HyPix6000E Synergy-S diffractometer using a  $\mu$ -focus Cu K $\alpha$  radiation source ( $\lambda = 1.54184\text{\AA}$ ) with collimating mirror monochromators. A total of 3612 frames of data were collected using  $\omega$ -scans with a scan range of  $0.5^\circ$  and a counting time of 7 seconds per frame for frames collected with a detector offset of  $\pm 48.0^\circ$  and 31 seconds per frame with frames collected with a detector offset of  $104.5^\circ$ . The data were collected at 100 K using an Oxford Cryostream low temperature device. Details of crystal data, data collection and structure refinement are listed in Table S1. Data collection, unit cell refinement and data reduction were performed using Rigaku Oxford Diffraction's CrysAlisPro V 1.171.41.123a. The structure was solved by direct methods using SHELXT and refined by full-matrix least-squares on F<sup>2</sup> with anisotropic displacement parameters for the non-H atoms using SHELXL-2018/3. Structure analysis was aided by use of the programs PLATON and OLEX2. The hydrogen atoms on the carbon atoms were calculated in ideal positions with isotropic displacement parameters set to 1.2xU<sub>eq</sub> of the attached atom. The hydrogen atoms on O1 and N2 were observed in a  $\Delta F$  map and refined with isotropic displacement parameters. A cylindrical void along 0,0,z contained highly disordered solvent molecules that could not be adequately modeled. The scattering due to these solvent molecules was accounted for using Bypass as utilized in OLEX2. The vinyl group atoms were disordered about two orientations with occupancies close to 50% each. The absolute structure was determined using the method of Flack and confirmed using the Hooft  $\gamma$ -parameter method, which resulted in a Hooft  $\gamma$ -parameter of -0.01(4).

**Table S1.** Crystal data and structure refinement for **3e**.

|                                         |                                                    |           |
|-----------------------------------------|----------------------------------------------------|-----------|
| <b>Empirical formula</b>                | C <sub>13</sub> H <sub>19</sub> F N <sub>2</sub> O |           |
| <b>Formula weight</b>                   | 238.30                                             |           |
| <b>Temperature</b>                      | 100.0(5) K                                         |           |
| <b>Wavelength</b>                       | 1.54184 Å                                          |           |
| <b>Crystal system</b>                   | hexagonal                                          |           |
| <b>Space group</b>                      | P 65                                               |           |
| <b>Unit cell dimensions</b>             | a = 19.3391(6) Å                                   | α = 90°.  |
|                                         | b = 19.3391(6) Å                                   | β = 90°.  |
|                                         | c = 6.43042(13) Å                                  | γ = 120°. |
| <b>Volume</b>                           | 2082.76(13) Å <sup>3</sup>                         |           |
| <b>Z</b>                                | 6                                                  |           |
| <b>Density (calculated)</b>             | 1.140 g/m <sup>3</sup>                             |           |
| <b>Absorption coefficient</b>           | 0.671 mm <sup>-1</sup>                             |           |
| <b>F(000)</b>                           | 768                                                |           |
| <b>Crystal size</b>                     | 0.28 x 0.081 x 0.075 mm <sup>3</sup>               |           |
| <b>Theta range for data collection</b>  | 2.638 to 76.224°                                   |           |
| <b>Index ranges</b>                     | -24 ≤ h ≤ 22, -24 ≤ k ≤ 17, -8 ≤ l ≤ 7             |           |
| <b>Reflections collected</b>            | 25998                                              |           |
| <b>Independent reflections</b>          | 2860 [R(int) = 0.0299]                             |           |
| <b>Completeness to theta = 67.684°</b>  | 100.0 %                                            |           |
| <b>Absorption correction</b>            | Gaussian                                           |           |
| <b>Max. and min. transmission</b>       | 1.000 and 0.685                                    |           |
| <b>Refinement method</b>                | Full-matrix least-squares on F <sup>2</sup>        |           |
| <b>Data / restraints / parameters</b>   | 2860 / 1 / 183                                     |           |
| <b>Goodness-of-fit on F<sup>2</sup></b> | 1.060                                              |           |
| <b>Final R indices [I &gt; 2σ(I)]</b>   | R1 = 0.0332, wR2 = 0.0948                          |           |
| <b>R indices (all data)</b>             | R1 = 0.0385, wR2 = 0.0981                          |           |
| <b>Absolute structure parameter</b>     | -0.02(5)                                           |           |
| <b>Extinction coefficient</b>           | n/a                                                |           |
| <b>Largest diff. peak and hole</b>      | 0.149 and -0.115 e.Å <sup>-3</sup>                 |           |

**Figure S1.** View of **3e** showing the atom labeling scheme. Displacement ellipsoids are scaled to the 30% probability level.

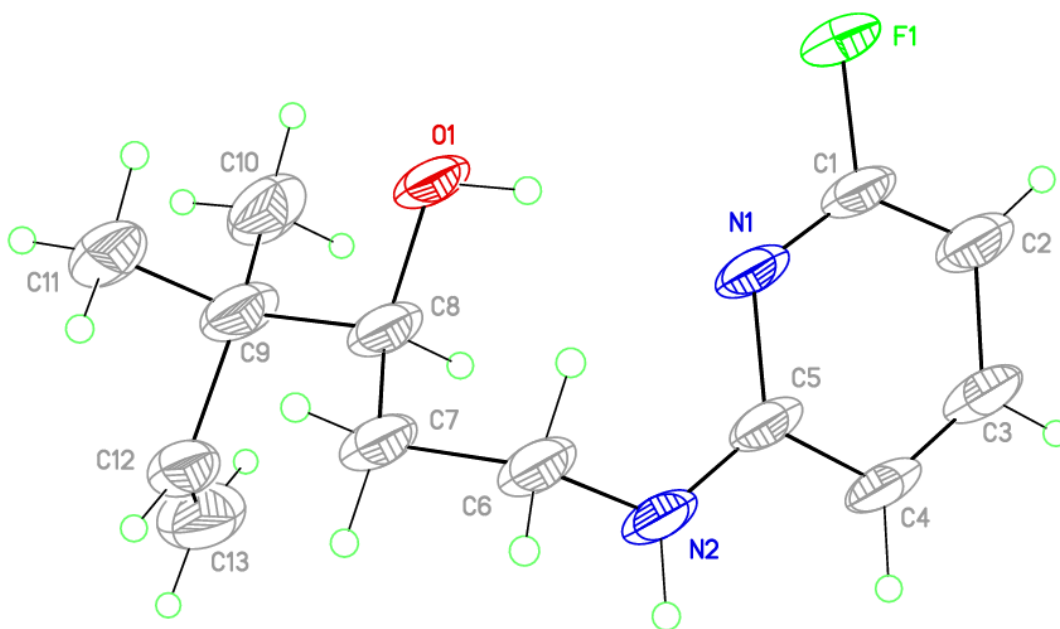

**Figure S2.** View of **3e** showing the atom labeling scheme. Displacement ellipsoids are scaled to the 30% probability level. The lower occupancy C atoms of the disordered vinyl group are labeled C12A and C13A.

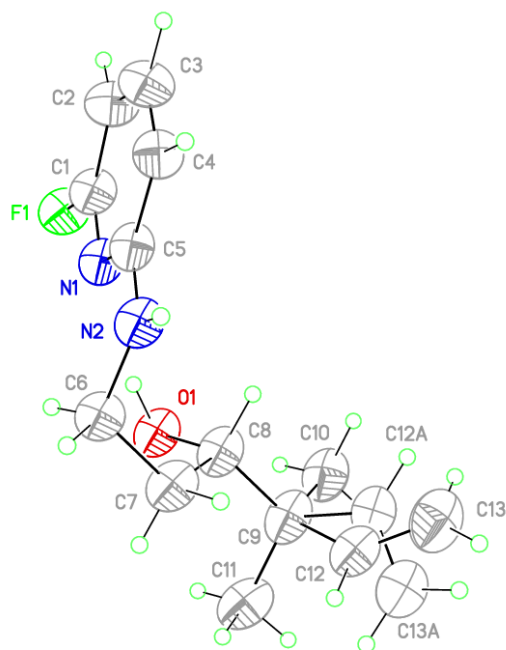

## Single Crystal Diffraction Data for Ruthenium Complexes

### Ruthenium Chloride Complex

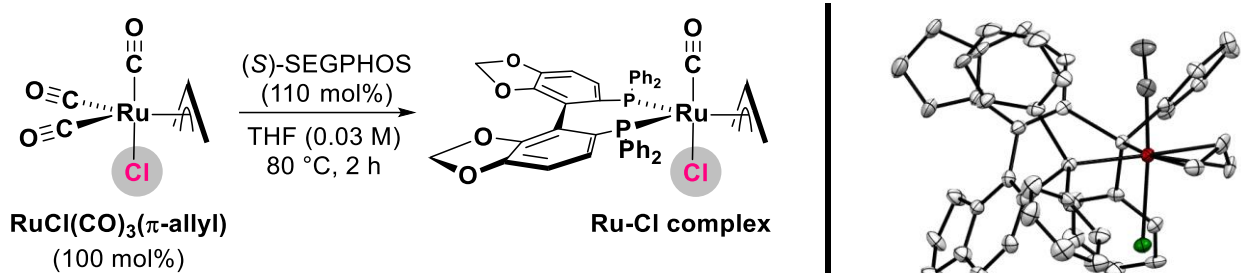

To a dried pressure tube equipped with a magnetic stir bar under an argon atmosphere, charged with  $\text{RuCl}(\text{CO})_3(\pi\text{-allyl})$  complex (14 mg, 0.06 mmol) and  $(S)\text{-SEGPHOS}$  (37 mg, 0.06 mmol), was added THF (2 mL, 0.03 M). The pressure tube was backfilled with argon and sealed with a PTFE lined cap and the reaction mixture was allowed to stir for 2 hours at 80 °C. The reaction mixture was directly subjected to an individual recrystallization apparatus under a bed of argon. Crystals grew as pale yellow needles by vapor diffusion of *n*-pentane into a THF solution. The data crystal was cut from a larger crystal and had approximate dimensions; 0.16 x 0.051 x 0.036 mm. The data were collected on an Agilent Technologies SuperNova Dual Source diffractometer using a  $\mu$ -focus Cu K $\alpha$  radiation source ( $\lambda = 1.5418\text{\AA}$ ) with collimating mirror monochromators. A total of 2962 frames of data were collected using  $\omega$ -scans with a scan range of 0.5° and a counting time of 8 seconds per frame for frames collected with a detector offset of +/- 48.6° and 32 seconds per frame with frames collected with a detector offset of 107.8°. The data were collected at 100 K using an Oxford Cryostream low temperature device. Details of crystal data, data collection and structure refinement are listed in Table S2. Data collection, unit cell refinement and data reduction were performed using Rigaku Oxford Diffraction's CrysAlisPro V 1.171.40.71a. The structure was solved by direct methods using SHELXT and refined by full-matrix least-squares on  $F^2$  with anisotropic displacement parameters for the non-H atoms using SHELXL-2018/3. Structure analysis was aided by use of the programs PLATON and OLEX2. The hydrogen atoms on the carbon atoms were calculated in ideal positions with isotropic displacement parameters set to 1.2xUeq of the attached atom (1.5xUeq for methyl hydrogen atoms). The absolute configuration was assigned knowing the configuration of the starting diphosphorus ligand and was corroborated using the method of Flack.



**Table S2.** Crystal data and structure refinement for **Ru-Cl** complex.

|                                         |                                                                     |                  |
|-----------------------------------------|---------------------------------------------------------------------|------------------|
| <b>Empirical formula</b>                | C <sub>46</sub> H <sub>41</sub> Cl O <sub>6</sub> P <sub>2</sub> Ru |                  |
| <b>Formula weight</b>                   | 888.25                                                              |                  |
| <b>Temperature</b>                      | 100.0(3) K                                                          |                  |
| <b>Wavelength</b>                       | 1.54184 Å                                                           |                  |
| <b>Crystal system</b>                   | monoclinic                                                          |                  |
| <b>Space group</b>                      | P 1 21 1                                                            |                  |
| <b>Unit cell dimensions</b>             | a = 10.4482(2) Å                                                    | α = 90°.         |
|                                         | b = 36.6441(4) Å                                                    | β = 116.757(2)°. |
|                                         | c = 11.5633(2) Å                                                    | γ = 90°.         |
| <b>Volume</b>                           | 3953.13(13) Å <sup>3</sup>                                          |                  |
| <b>Z</b>                                | 4                                                                   |                  |
| <b>Density (calculated)</b>             | 1.492 g/m <sup>3</sup>                                              |                  |
| <b>Absorption coefficient</b>           | 5.007 mm <sup>-1</sup>                                              |                  |
| <b>F(000)</b>                           | 1824                                                                |                  |
| <b>Crystal size</b>                     | 0.156 x 0.051 x 0.036 mm <sup>3</sup>                               |                  |
| <b>Theta range for data collection</b>  | 2.411 to 77.036°                                                    |                  |
| <b>Index ranges</b>                     | -13 ≤ h ≤ 12, -45 ≤ k ≤ 37, -14 ≤ l ≤ 14                            |                  |
| <b>Reflections collected</b>            | 38582                                                               |                  |
| <b>Independent reflections</b>          | 10931 [R(int) = 0.0591]                                             |                  |
| <b>Completeness to theta = 67.684°</b>  | 99.3 %                                                              |                  |
| <b>Absorption correction</b>            | Semi-empirical from equivalents                                     |                  |
| <b>Max. and min. transmission</b>       | 1.00000 and 0.61981                                                 |                  |
| <b>Refinement method</b>                | Full-matrix least-squares on F <sup>2</sup>                         |                  |
| <b>Data / restraints / parameters</b>   | 10931 / 1045 / 1026                                                 |                  |
| <b>Goodness-of-fit on F<sup>2</sup></b> | 1.053                                                               |                  |
| <b>Final R indices [I &gt; 2σ(I)]</b>   | R1 = 0.0536, wR2 = 0.1367                                           |                  |
| <b>R indices (all data)</b>             | R1 = 0.0543, wR2 = 0.1372                                           |                  |
| <b>Absolute structure parameter</b>     | 0.083(9)                                                            |                  |
| <b>Extinction coefficient</b>           | n/a                                                                 |                  |
| <b>Largest diff. peak and hole</b>      | 2.433 and -1.318 e.Å <sup>-3</sup>                                  |                  |

**Figure S3.** View of the Ru-Cl complex **1** in **1** showing the heteroatom labeling scheme. Displacement ellipsoids are scaled to the 50% probability level.

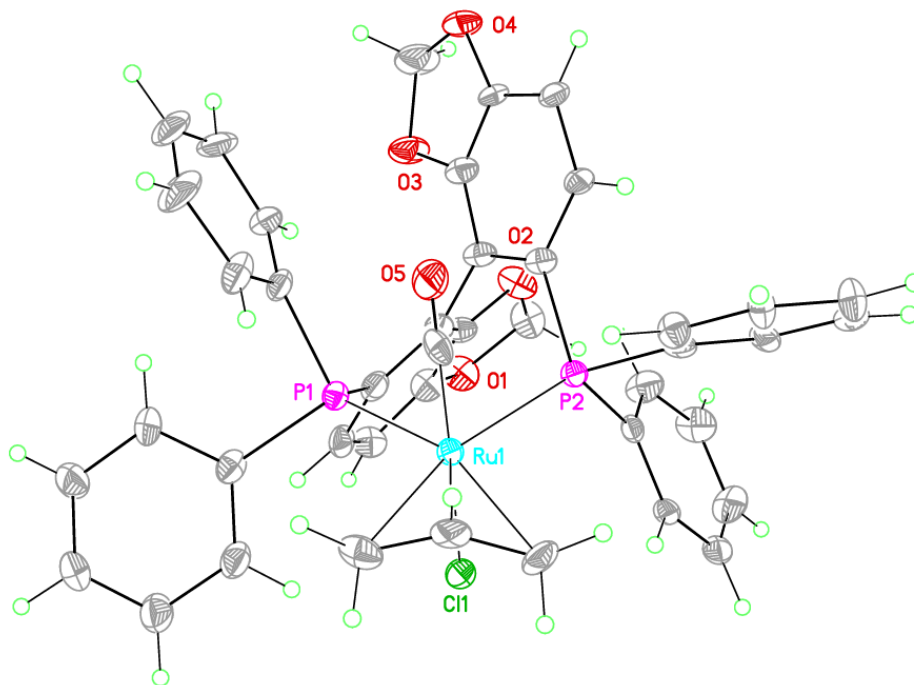

View of the Ru-Cl complex in Xtal3, showing two molecules of the complex in the asymmetric unit.

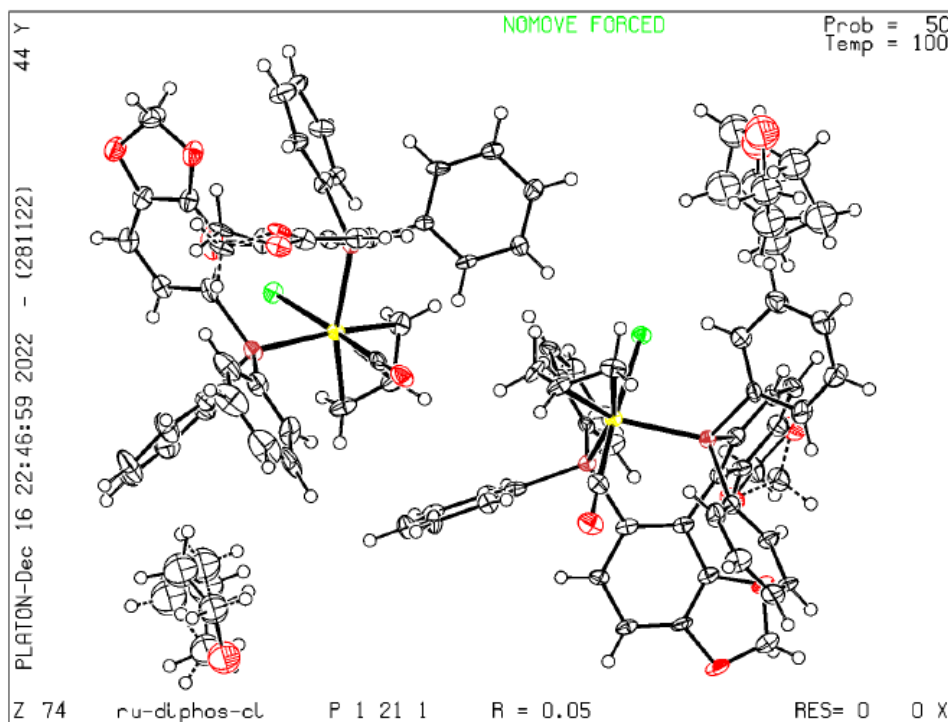

## Ruthenium Iodide Complex

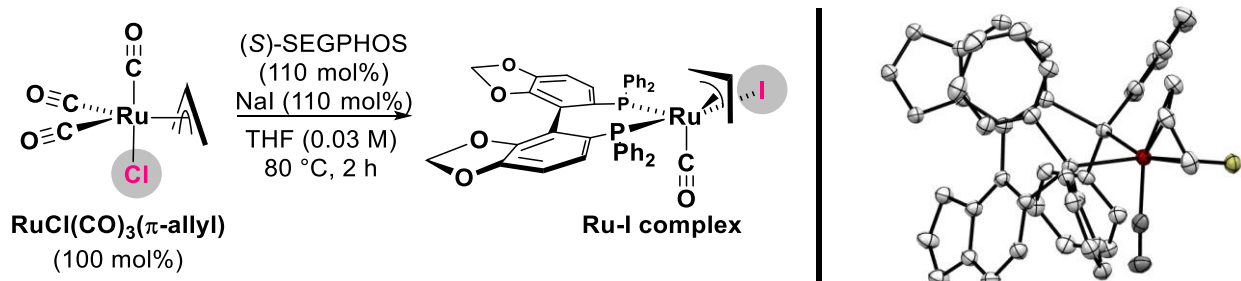

To a dried pressure tube equipped with a magnetic stir bar under an argon atmosphere, charged with  $\text{RuCl}(\text{CO})_3(\pi\text{-allyl})$  complex (14 mg, 0.06 mmol),  $(S)$ -SEGPHOS (37 mg, 0.06 mmol), and NaI (9 mg, 0.06 mmol), was added THF (2 mL, 0.03 M). The pressure tube was backfilled with argon and sealed with a PTFE lined cap and the reaction mixture was allowed to stir for 2 hours at 80 °C. The reaction mixture was directly subjected to an individual recrystallization apparatus under a bed of argon. Crystals grew as long yellow needles by vapor diffusion of *n*-pentane into a THF solution. The data crystal was cut from a longer crystal and had approximate dimensions; 0.20 x 0.13 x 0.11 mm. The data were collected on a Rigaku Oxford Diffraction HyPix6000E Synergy-S diffractometer using a  $\mu$ -focus Cu K $\alpha$  radiation source ( $\lambda = 1.54184\text{\AA}$ ) with collimating mirror monochromators. A total of 2173 frames of data were collected using  $\omega$ -scans with a scan range of 0.5° and a counting time of 2 seconds per frame for frames collected with a detector offset of +/- 48.3° and 9 seconds per frame with frames collected with a detector offset of -106.0 and 110.1°. The data were collected at 100 K using an Oxford Cryostream low temperature device. Details of crystal data, data collection and structure refinement are listed in Table S3. Data collection, unit cell refinement and data reduction were performed using Rigaku Oxford Diffraction's CrysAlisPro V 1.171.42.25a. The structure was solved by direct methods using SHELXT and refined by full-matrix least-squares on  $F^2$  with anisotropic displacement parameters for the non-H atoms using SHELXL-2018/3. Structure analysis was aided by use of the programs PLATON and OLEX2. The hydrogen atoms on the carbon atoms were calculated in ideal positions with isotropic displacement parameters set to 1.2xUeq of the attached atom. The absolute structure was determined using the method of Flack and confirmed using the Hooft  $\gamma$ -parameter method, which resulted in a Hooft  $\gamma$ -parameter of -0.012(1).

**Table S3.** Crystal data and structure refinement for **Ru-I** complex.

|                                         |                                                                    |          |
|-----------------------------------------|--------------------------------------------------------------------|----------|
| <b>Empirical formula</b>                | C <sub>46</sub> H <sub>41</sub> I O <sub>6</sub> P <sub>2</sub> Ru |          |
| <b>Formula weight</b>                   | 979.70                                                             |          |
| <b>Temperature</b>                      | 100.0(1) K                                                         |          |
| <b>Wavelength</b>                       | 1.54184 Å                                                          |          |
| <b>Crystal system</b>                   | tetragonal                                                         |          |
| <b>Space group</b>                      | P 43                                                               |          |
| <b>Unit cell dimensions</b>             | a = 17.94215(7) Å                                                  | α = 90°. |
|                                         | b = 17.94215(7) Å                                                  | β = 90°. |
|                                         | c = 12.33385(8) Å                                                  | γ = 90°. |
| <b>Volume</b>                           | 3970.52(4) Å <sup>3</sup>                                          |          |
| <b>Z</b>                                | 4                                                                  |          |
| <b>Density (calculated)</b>             | 1.639 g/m <sup>3</sup>                                             |          |
| <b>Absorption coefficient</b>           | 10.472 mm <sup>-1</sup>                                            |          |
| <b>F(000)</b>                           | 1968                                                               |          |
| <b>Crystal size</b>                     | 0.201 x 0.129 x 0.109 mm <sup>3</sup>                              |          |
| <b>Theta range for data collection</b>  | 2.463 to 79.016°                                                   |          |
| <b>Index ranges</b>                     | -19 ≤ h ≤ 22, -22 ≤ k ≤ 22, -15 ≤ l ≤ 15                           |          |
| <b>Reflections collected</b>            | 29899                                                              |          |
| <b>Independent reflections</b>          | 8172 [R(int) = 0.0344]                                             |          |
| <b>Completeness to theta = 67.684°</b>  | 100.0 %                                                            |          |
| <b>Absorption correction</b>            | Gaussian                                                           |          |
| <b>Max. and min. transmission</b>       | 0.544 and 0.262                                                    |          |
| <b>Refinement method</b>                | Full-matrix least-squares on F <sup>2</sup>                        |          |
| <b>Data / restraints / parameters</b>   | 8172 / 66 / 540                                                    |          |
| <b>Goodness-of-fit on F<sup>2</sup></b> | 1.066                                                              |          |
| <b>Final R indices [I &gt; 2σ(I)]</b>   | R1 = 0.0251, wR2 = 0.0681                                          |          |
| <b>R indices (all data)</b>             | R1 = 0.0251, wR2 = 0.0682                                          |          |
| <b>Absolute structure parameter</b>     | -0.003(2)                                                          |          |
| <b>Extinction coefficient</b>           | n/a                                                                |          |
| <b>Largest diff. peak and hole</b>      | 0.582 and -0.491 e.Å <sup>-3</sup>                                 |          |

**Figure S4.** View of the Ru-I complex **1** in **1** showing the heteroatom labeling scheme. Displacement ellipsoids are scaled to the 50% probability level.

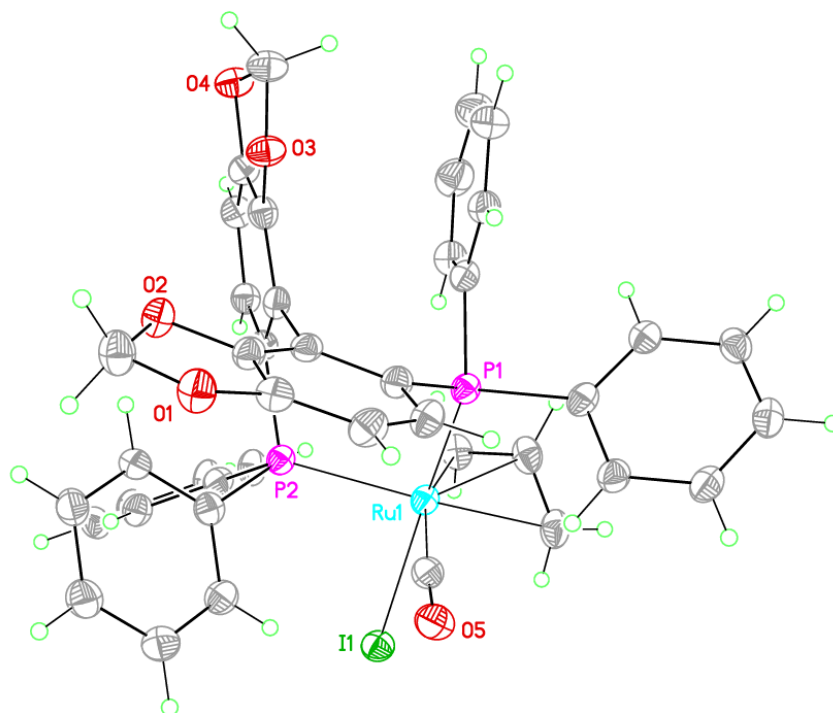

View of the Ru-I complex in Xtal3, showing a single molecule in the asymmetric unit.

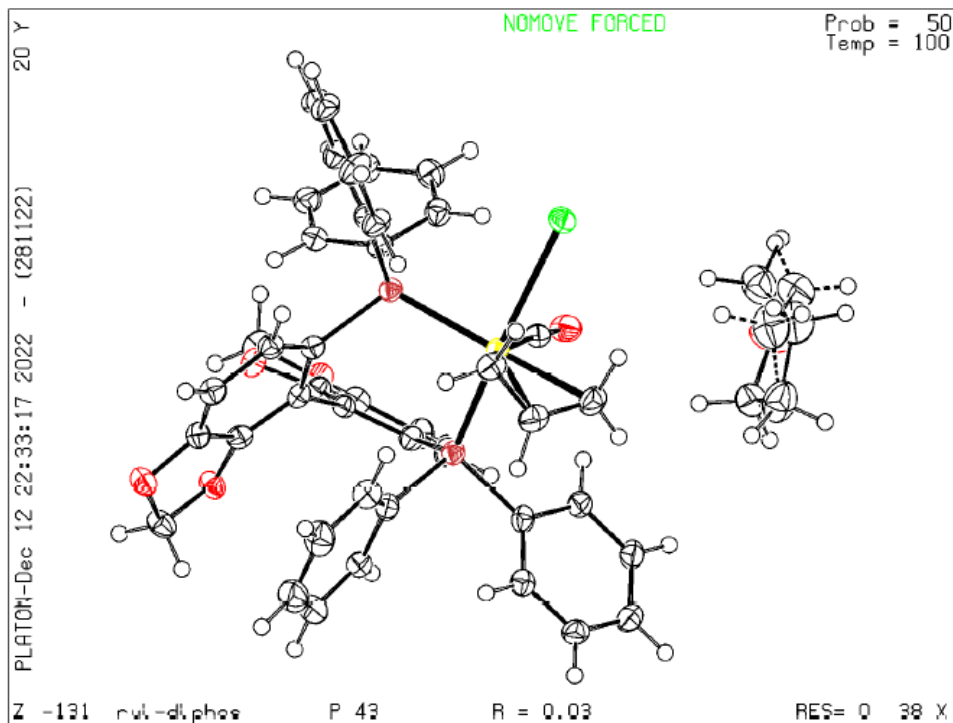

## DFT Calculations.

DFT calculations were conducted using the *Gaussian16*<sup>6</sup> program package. Geometry optimization and analytical vibrational frequency analysis were performed via the restricted Kohn-Sham DFT using the long-range corrected (LC) hybrid density functional with empirical dispersion corrections ( $\omega$ B97X-D).<sup>7</sup> Pople's 6-311G(d,p) basis set for C, H, O, P and I atoms<sup>8,9</sup> and the SDD with the effective core potential for the Ru atom<sup>10</sup> were used for the Gaussian basis functions (5d type polarization functions). The solvent effect of THF were estimated by the polarizable continuum model with integral equation formalism (IEF-PCM)<sup>11</sup> for the gas-phase optimized structures. For the IEF-PCM calculations, the Def2-TZVPP basis set<sup>12</sup> was used for basis functions ( $\omega$ B97X-D(PCM)/Def2-TZVPP// $\omega$ B97X-D/(SDD, 6-311G(d,p))). The Gibbs free energy at 393 K was estimated by the PCM total energy and the gas-phase thermal free energy term.

Structures of iodide-bound  $\pi$ -allyl complex [RuI(CO)( $\eta^3$ -C<sub>3</sub>H<sub>5</sub>)(*S*-SEGPHOS)], **K-N**, and chloride-bound  $\pi$ -allyl complex [RuCl(CO)( $\eta^3$ -C<sub>3</sub>H<sub>5</sub>)(*S*-SEGPHOS)], **K'-N'**, are shown in Figures S5. The corresponding iodide-bound  $\pi$ -prenyl complex [RuI(CO)( $\eta^3$ -CH<sub>2</sub>CHC(CH<sub>3</sub>)<sub>2</sub>)(*S*-SEGPHOS)], **B** and **O-U**, and chloride-bound  $\pi$ -prenyl complex [RuCl(CO)( $\eta^3$ -CH<sub>2</sub>CHC(CH<sub>3</sub>)<sub>2</sub>)(*S*-SEGPHOS)], **B'** and **O'-U'**, are shown Figures S6.

For the six-membered cyclic transition state structures for the attack of  $\pi$ -prenyl ligand by acetaldehyde, 36 structures were examined (Figure S7). Among these structures, which include both *cis*- and *trans*- $\pi$ -allyl species, two transition state structures from the lowest energy structure are **TS2B** and **TS1B**. In these *cis*-  $\pi$ -allyl species, the hydrogen atom in aldehyde is directed to the iodide ligand (the distances between the hydrogen atom and the iodide atom are 2.99 and 2.93 Å in **TS2B**, and **TS1B**, respectively), as suggested by our previous study.<sup>13</sup> The reaction pathways via **TS1B** (*tert*-prenylation pathway) and via **TS2B** (*sec*-prenylation pathway) are shown in Figure 4. Structures are shown in Figures S8 and S9.

**Table S4. Total Electronic Energy (*E*) and Gibbs Free Energy (*G*) in THF at 333K (au)**

|          | <i>E</i><br>( $\omega$ B97X-D/(SDD, 6-311G<br>(d,p)))) | <i>thermal free</i><br><i>term (393K)</i> | <i>E</i> ( $\omega$ B97X-D(PCM)/Def2-<br>TZVPP// $\omega$ B97X-D/(SDD, 6-<br>311G(d,p))) | <i>G</i>     |
|----------|--------------------------------------------------------|-------------------------------------------|------------------------------------------------------------------------------------------|--------------|
| K        | -9693.709404                                           | 0.529931                                  | -3072.136118                                                                             | -3071.606187 |
| L        | -9693.700638                                           | 0.530859                                  | -3072.125888                                                                             | -3071.595029 |
| M        | -9693.702402                                           | 0.528228                                  | -3072.127615                                                                             | -3071.599387 |
| N        | -9693.701186                                           | 0.528977                                  | -3072.125591                                                                             | -3071.596614 |
| K'       | -3234.233118                                           | 0.532118                                  | -3234.557126                                                                             | -3234.025008 |
| L'       | -3234.223762                                           | 0.532857                                  | -3234.546447                                                                             | -3234.013590 |
| M'       | -3234.233691                                           | 0.529312                                  | -3234.554793                                                                             | -3234.025481 |
| N'       | -3234.231120                                           | 0.529854                                  | -3234.551784                                                                             | -3234.021930 |
| B        | -9772.322854                                           | 0.580106                                  | -3150.757744                                                                             | -3150.177638 |
| O        | -9772.324121                                           | 0.581442                                  | -3150.758027                                                                             | -3150.176585 |
| P        | -9772.318517                                           | 0.582837                                  | -3150.750196                                                                             | -3150.167359 |
| Q        | -9772.325545                                           | 0.580450                                  | -3150.760873                                                                             | -3150.180423 |
| R        | -9772.328684                                           | 0.581862                                  | -3150.760104                                                                             | -3150.178242 |
| S        | -9772.325528                                           | 0.580230                                  | -3150.757537                                                                             | -3150.177307 |
| T        | -9772.326736                                           | 0.580674                                  | -3150.757485                                                                             | -3150.176811 |
| U        | -9772.321964                                           | 0.581304                                  | -3150.753675                                                                             | -3150.172371 |
| B'       | -3312.846693                                           | 0.582890                                  | -3313.179090                                                                             | -3312.596200 |
| O'       | -3312.849828                                           | 0.583570                                  | -3313.180704                                                                             | -3312.597134 |
| P'       | -3312.843786                                           | 0.585989                                  | -3313.172582                                                                             | -3312.586593 |
| Q'       | -3312.850478                                           | 0.580966                                  | -3313.182481                                                                             | -3312.601515 |
| R'       | -3312.860454                                           | 0.584850                                  | -3313.187682                                                                             | -3312.602832 |
| S'       | -3312.858644                                           | 0.584457                                  | -3313.186392                                                                             | -3312.601935 |
| T'       | -3312.858608                                           | 0.583325                                  | -3313.185546                                                                             | -3312.602221 |
| U'       | -3312.857280                                           | 0.585118                                  | -3313.183682                                                                             | -3312.598564 |
| A        | -9576.973176                                           | 0.463931                                  | -2955.393363                                                                             | -2954.929432 |
| isoprene | -195.290464                                            | 0.073830                                  | -195.318009                                                                              | -195.244179  |
| ethanal  | -153.820932                                            | 0.021003                                  | -153.848911                                                                              | -153.827908  |
| C        | -9926.149153                                           | 0.622470                                  | -3304.606067                                                                             | -3303.983597 |
| TS1A     | -9926.144318                                           | 0.626132                                  | -3304.601059                                                                             | -3303.974927 |
| D        | -9926.164489                                           | 0.629264                                  | -3304.618039                                                                             | -3303.988775 |
| TS1B     | -9926.157885                                           | 0.632595                                  | -3304.610019                                                                             | -3303.977424 |
| E        | -9926.186506                                           | 0.638511                                  | -3304.637560                                                                             | -3303.999049 |
| F        | -9772.312489                                           | 0.580933                                  | -3150.744663                                                                             | -3150.163730 |
| G        | -9772.306923                                           | 0.575815                                  | -3150.743299                                                                             | -3150.167484 |
| H        | -9926.140784                                           | 0.623752                                  | -3304.599414                                                                             | -3303.975662 |
| TS2A     | -9926.140269                                           | 0.625967                                  | -3304.597523                                                                             | -3303.971556 |
| I        | -9926.163395                                           | 0.629812                                  | -3304.616177                                                                             | -3303.986365 |

|             |              |          |              |              |
|-------------|--------------|----------|--------------|--------------|
| <b>TS2B</b> | -9926.160079 | 0.633091 | -3304.611816 | -3303.978725 |
| <b>J</b>    | -9926.185046 | 0.636295 | -3304.636991 | -3304.000696 |

---



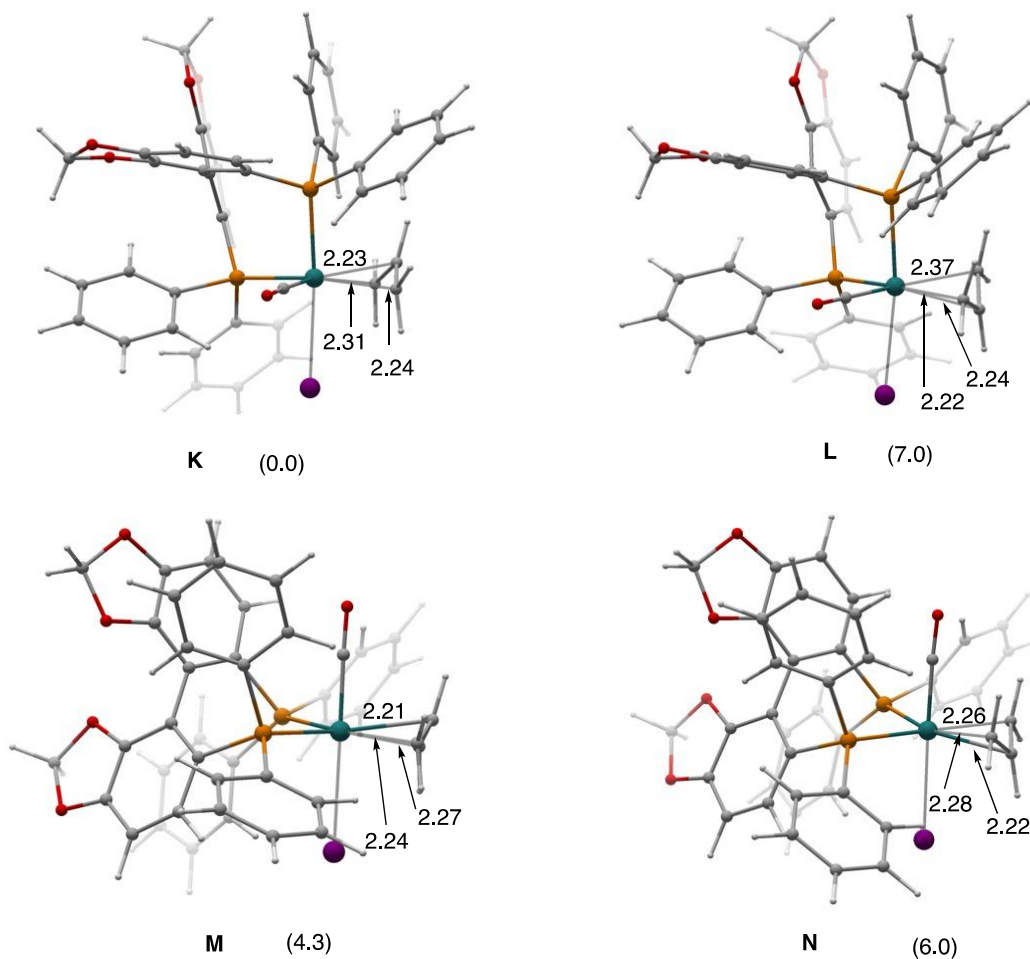

**Figure S5.** Structures of iodide-bound  $\pi$ -allyl complex  $[\text{RuI}(\text{CO})(\eta^3\text{-C}_3\text{H}_5)((S)\text{-SEGPHOS})]$ , **K–N**, and chloride-bound  $\pi$ -allyl complex  $[\text{RuCl}(\text{CO})(\eta^3\text{-C}_3\text{H}_5)((S)\text{-SEGPHOS})]$ , **K'–N'**. The bond lengths are given in Å. The relative Gibbs free energies at 393 K are given in parentheses (kcal/mol).

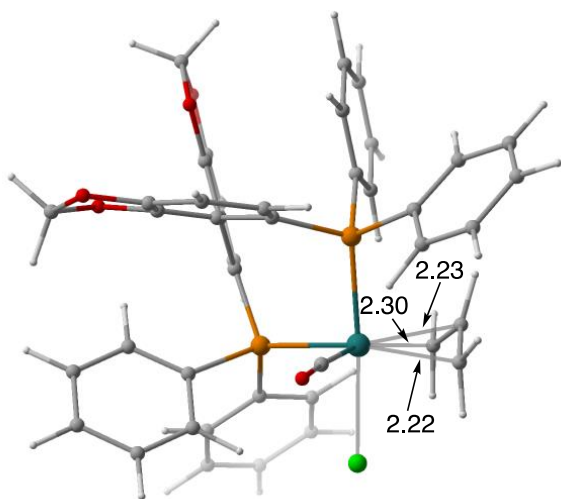

**K'** (0.3)

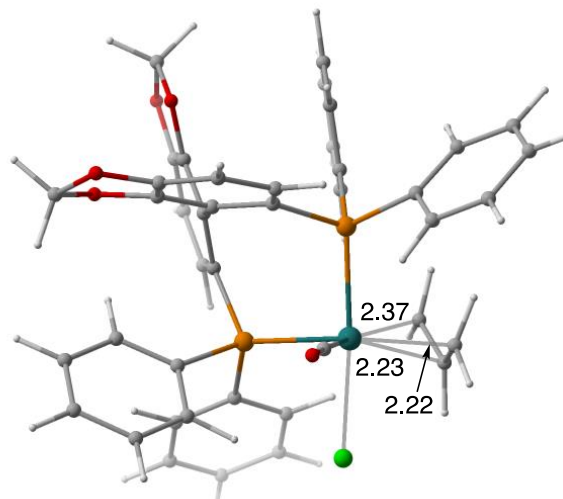

**L'** (7.5)

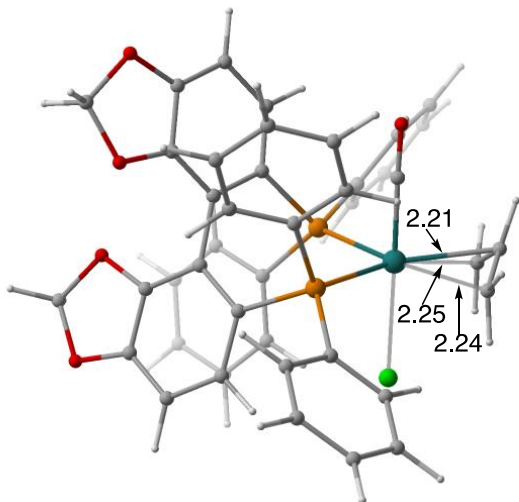

**M'** (0.0)

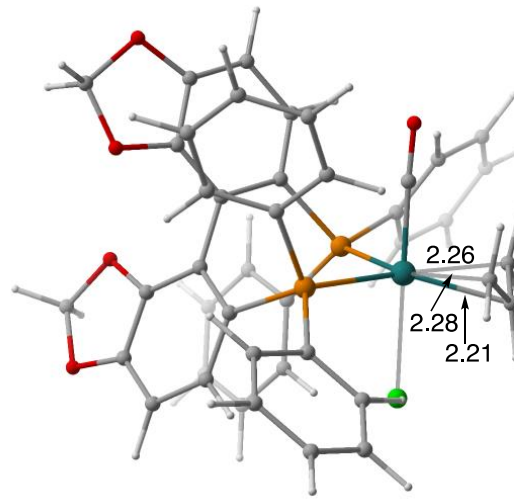

**N'** (2.2)

**Figure S5. (Continued.)**

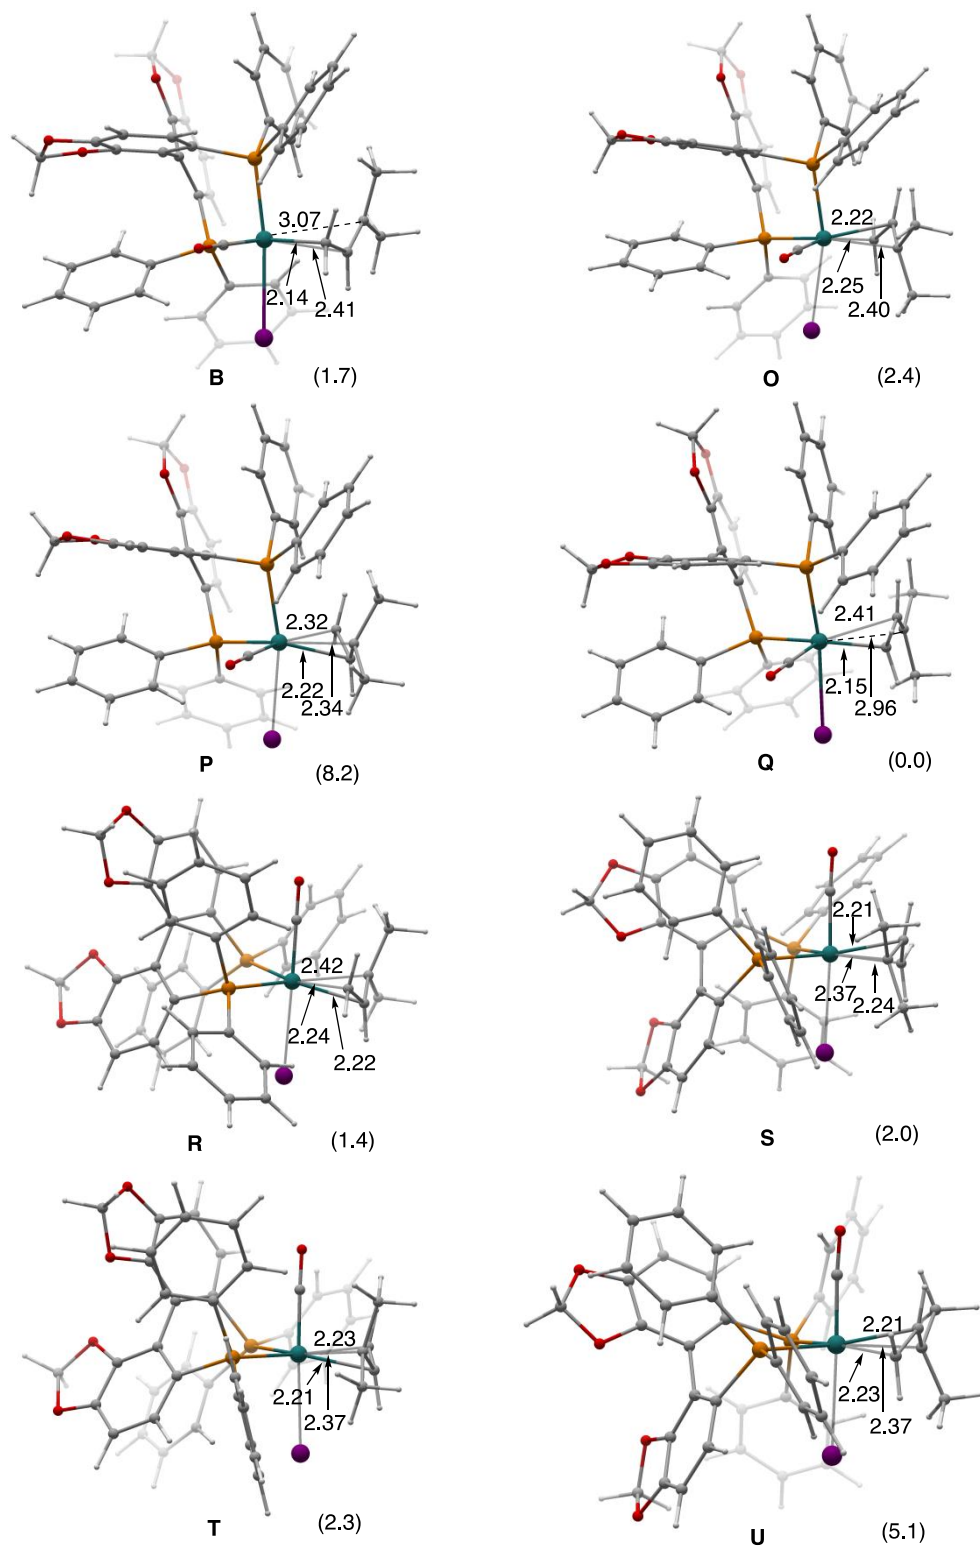

**Figure S6.** Structures of iodide-bound  $\pi$ -prenyl complex  $[\text{RuI}(\text{CO})(\eta^3\text{-CH}_2\text{CHC}(\text{CH}_3)_2)((S)\text{-SEGPHOS})]$ , **B** and **O–U**, and of chloride-bound  $\pi$ -prenyl complex  $[\text{RuCl}(\text{CO})(\eta^3\text{-CH}_2\text{CHC}(\text{CH}_3)_2)((S)\text{-SEGPHOS})]$ , **B’** and **O’–U’**. The bond lengths are given in Å. The relative Gibbs free energies at 393 K are given in parentheses (kcal/mol).

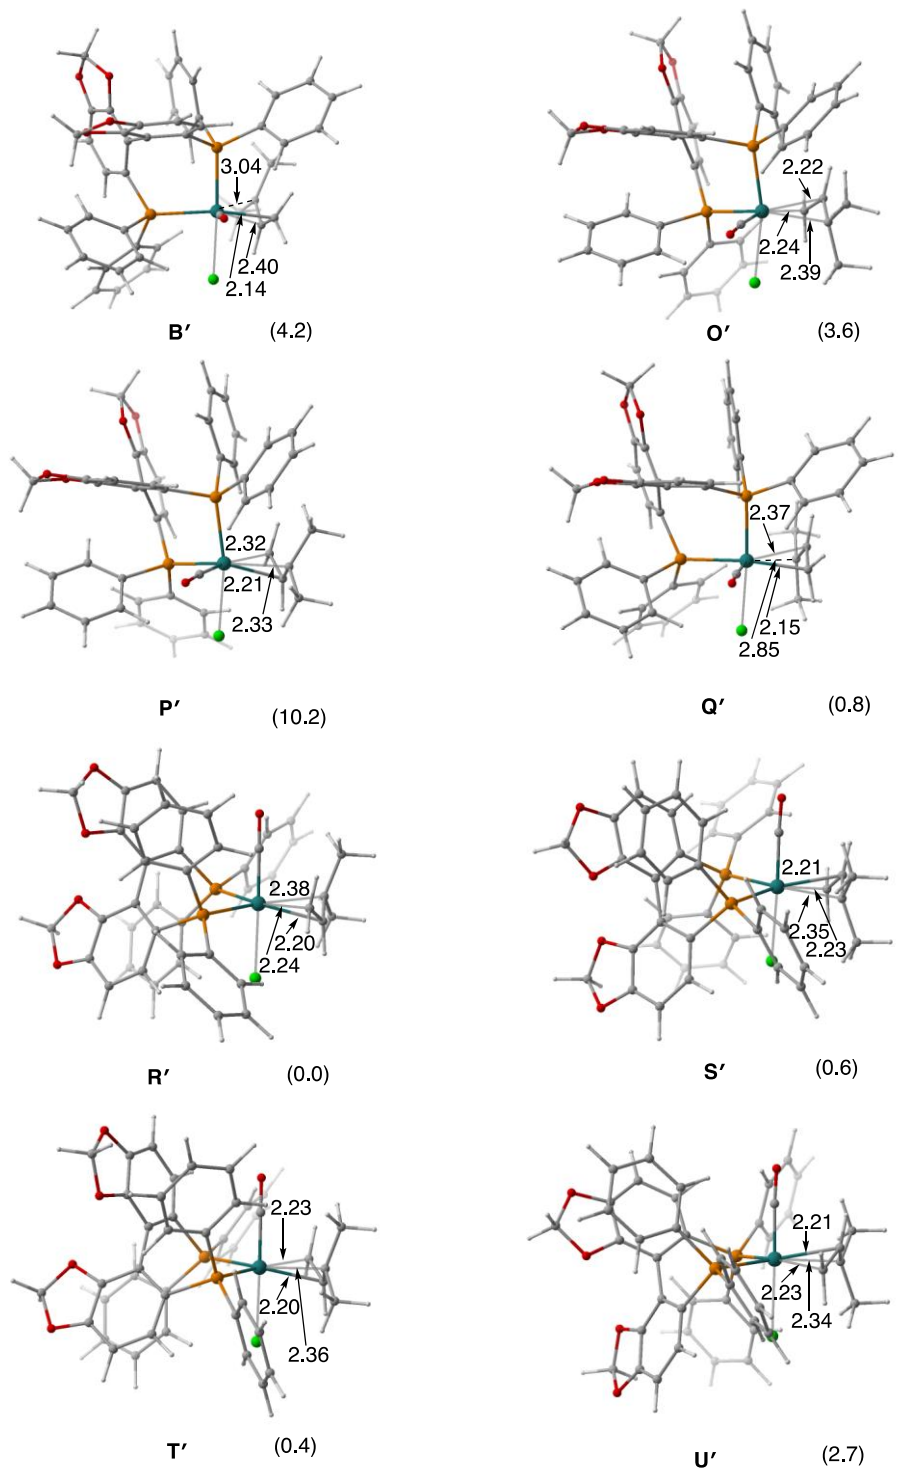

**Figure S6.** (Continued.)

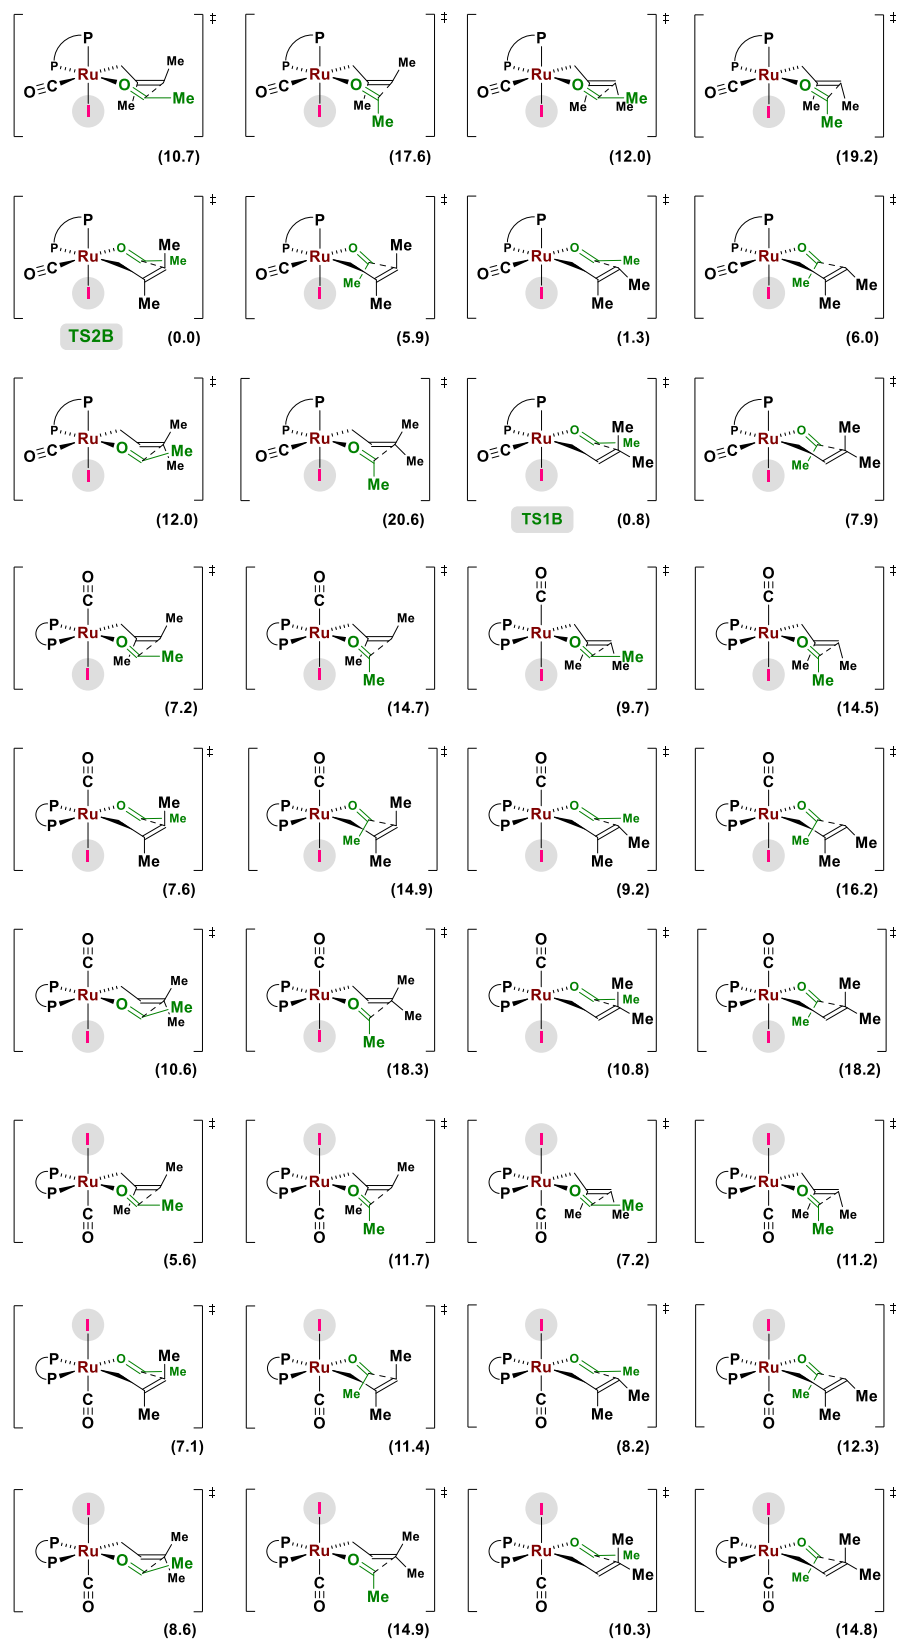

**Figure S7.** Examined transition structures. The relative Gibbs free energies at 393 K are given in parentheses (kcal/mol).

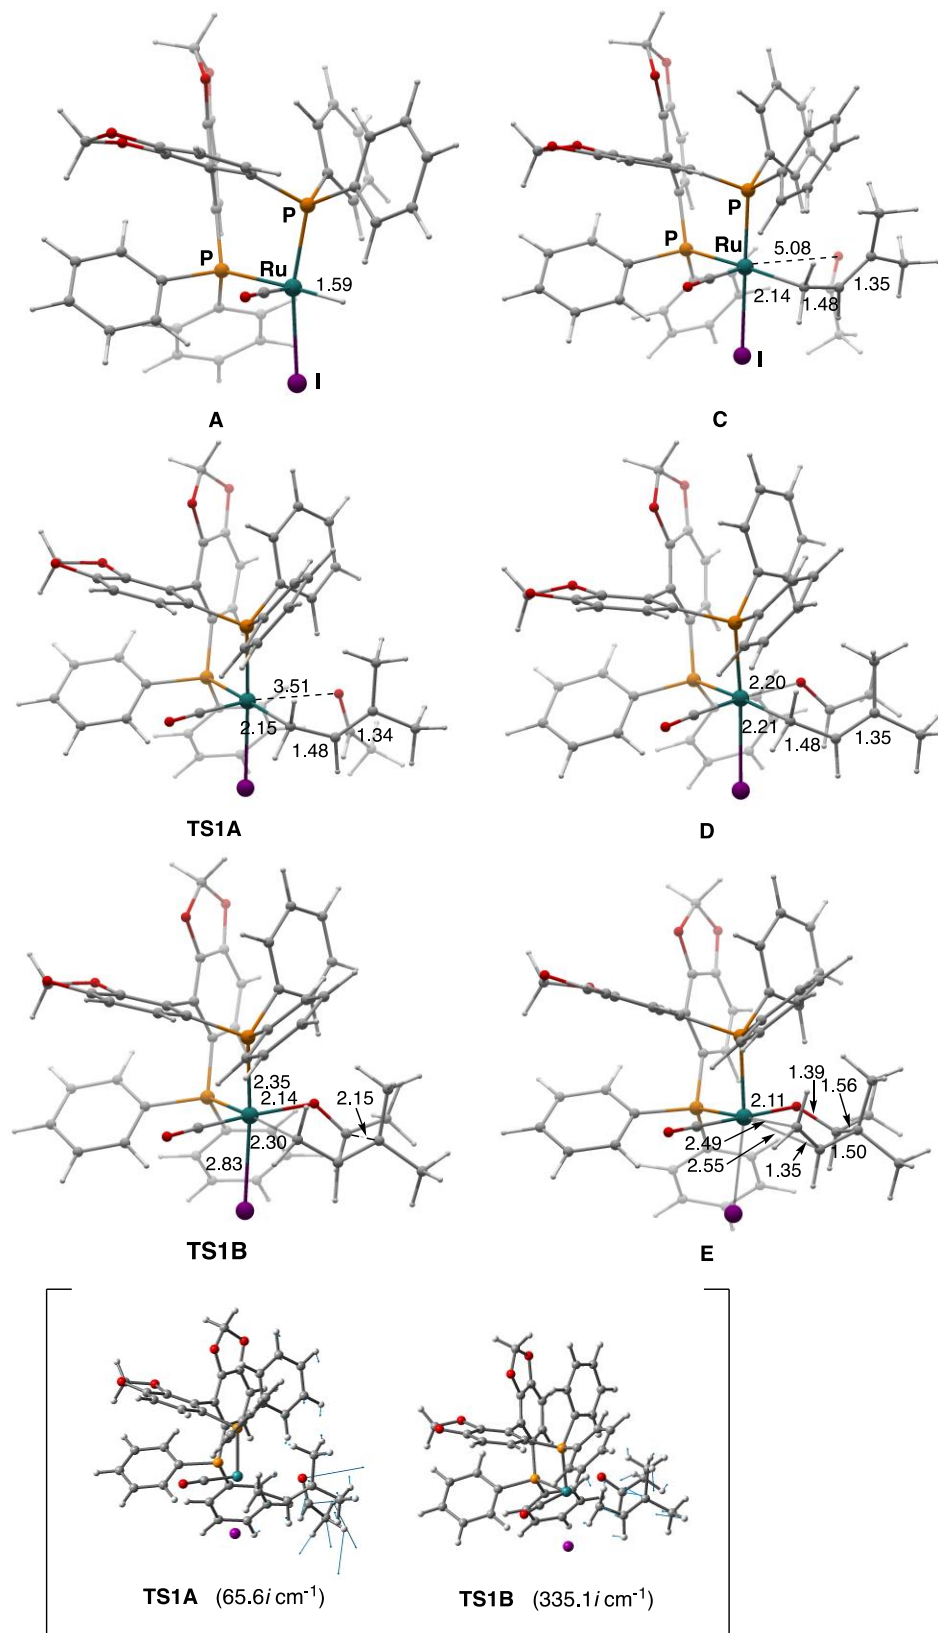

**Figure S8.** Structures along the *tert*-prenylation pathway. The bond lengths are given in Å.

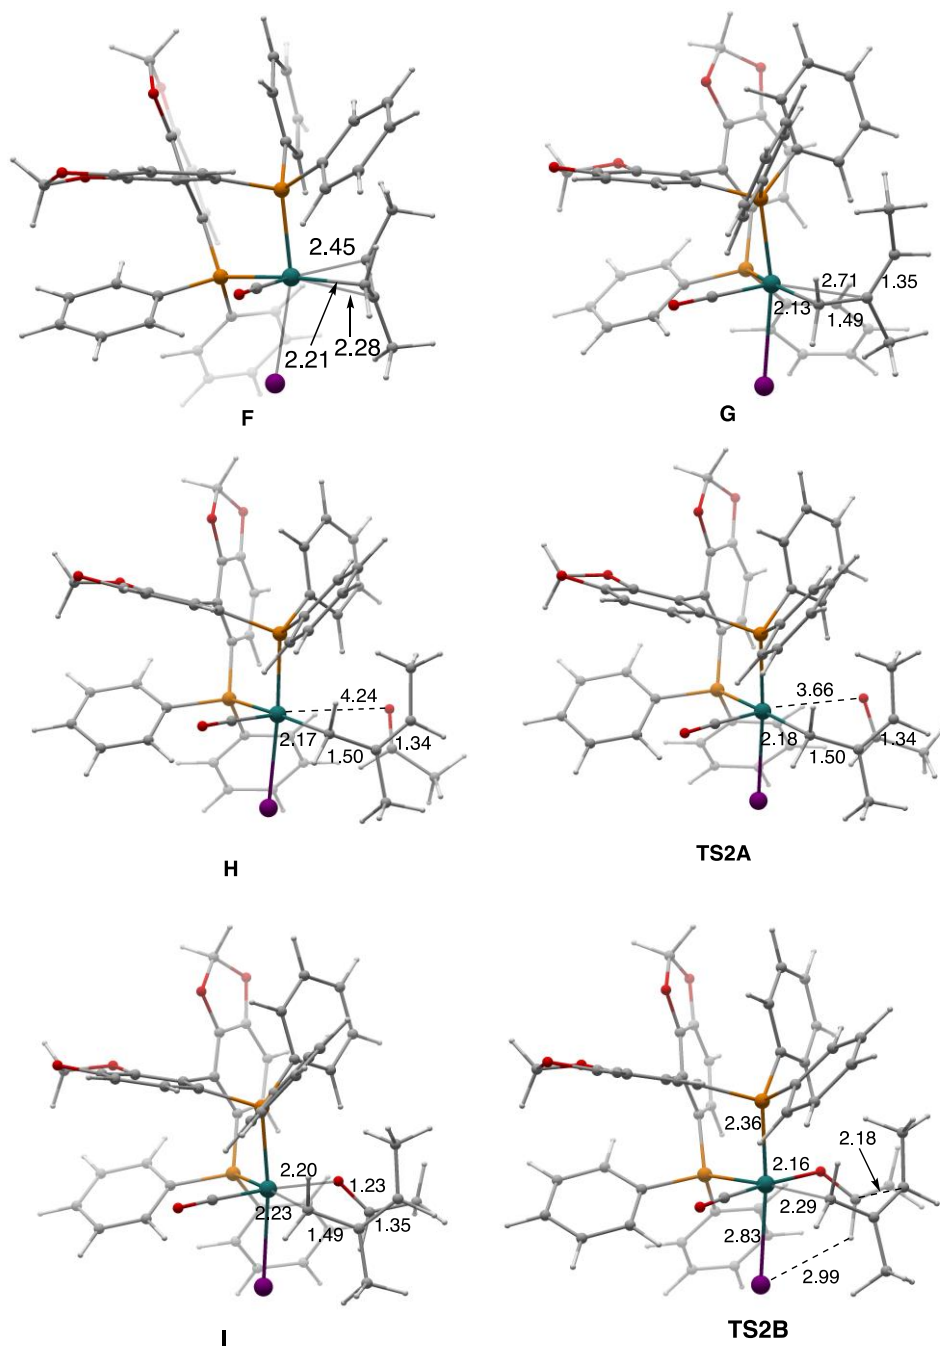

**Figure S9.** Structures along the *sec*-prenylation pathway. The bond lengths are given in Å.

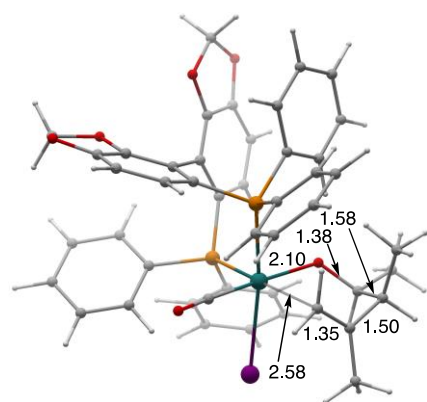

**J**

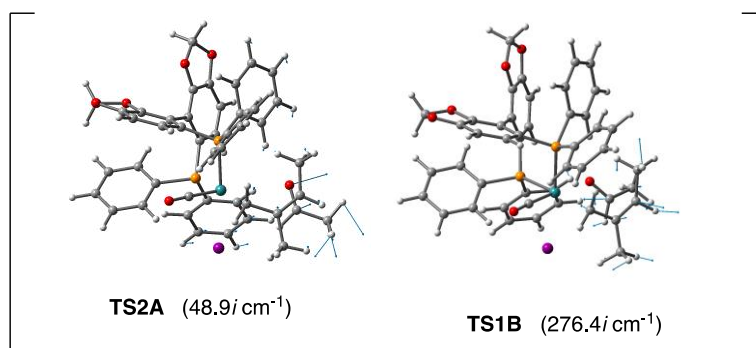

**Figure S9.** (Continued).



Cartesian coordinates of stationary points at the  $\omega$ B97X-D/(SDD, 6-311G(d,p)) level of theory are given below:

**K (NIMAG=0)**

| Center Number | Atomic Number | Atomic Type | Coordinates (Angstroms) |           |           |
|---------------|---------------|-------------|-------------------------|-----------|-----------|
|               |               |             | X                       | Y         | Z         |
| 1             | 44            | 0           | 1.188194                | 1.383254  | -0.075258 |
| 2             | 53            | 0           | 4.001460                | 1.134959  | 0.278430  |
| 3             | 15            | 0           | -1.127827               | 1.560740  | 0.004784  |
| 4             | 15            | 0           | 1.142028                | -0.999915 | -0.320110 |
| 5             | 8             | 0           | -2.941010               | -2.403711 | 4.022934  |
| 6             | 8             | 0           | -2.405287               | -3.155566 | 1.926597  |
| 7             | 8             | 0           | -4.029435               | -1.997234 | -0.614917 |
| 8             | 8             | 0           | -3.954106               | -2.908027 | -2.726959 |
| 9             | 8             | 0           | 1.199946                | 1.567203  | 2.937307  |
| 10            | 6             | 0           | -1.819267               | 0.416552  | 1.266407  |
| 11            | 6             | 0           | -2.188036               | 0.861282  | 2.529161  |
| 12            | 1             | 0           | -2.184218               | 1.919266  | 2.748891  |
| 13            | 6             | 0           | -2.576308               | -0.015373 | 3.549623  |
| 14            | 1             | 0           | -2.862525               | 0.344363  | 4.528685  |
| 15            | 6             | 0           | -2.576292               | -1.349747 | 3.244857  |
| 16            | 6             | 0           | -2.563664               | -3.557567 | 3.280413  |
| 17            | 1             | 0           | -3.353516               | -4.304412 | 3.345295  |
| 18            | 1             | 0           | -1.606089               | -3.934723 | 3.659576  |
| 19            | 6             | 0           | -2.239138               | -1.804394 | 1.977108  |
| 20            | 6             | 0           | -1.847205               | -0.969300 | 0.957528  |
| 21            | 6             | 0           | -1.631717               | -1.551962 | -0.396794 |
| 22            | 6             | 0           | -2.742151               | -2.030782 | -1.053241 |
| 23            | 6             | 0           | -4.811984               | -2.611617 | -1.629406 |
| 24            | 1             | 0           | -5.243175               | -3.540447 | -1.242961 |
| 25            | 1             | 0           | -5.588142               | -1.916312 | -1.957344 |
| 26            | 6             | 0           | -2.697473               | -2.584024 | -2.322344 |
| 27            | 6             | 0           | -1.513199               | -2.727238 | -2.993446 |
| 28            | 1             | 0           | -1.468197               | -3.168547 | -3.980178 |
| 29            | 6             | 0           | -0.362044               | -2.268961 | -2.340674 |
| 30            | 1             | 0           | 0.586549                | -2.387355 | -2.845564 |
| 31            | 6             | 0           | -0.395819               | -1.681625 | -1.080565 |
| 32            | 6             | 0           | 1.185137                | 1.446525  | 1.796704  |
| 33            | 6             | 0           | 1.676135                | 2.028717  | -2.240949 |
| 34            | 1             | 0           | 1.180200                | 1.658566  | -3.131523 |
| 35            | 1             | 0           | 2.755601                | 1.940809  | -2.241119 |
| 36            | 6             | 0           | 1.055734                | 3.064495  | -1.528705 |
| 37            | 6             | 0           | 1.583842                | 3.569540  | -0.322633 |
| 38            | 1             | 0           | 0.041327                | 3.345201  | -1.806866 |
| 39            | 1             | 0           | 0.985023                | 4.287595  | 0.225875  |
| 40            | 1             | 0           | 2.654983                | 3.658317  | -0.195435 |
| 41            | 6             | 0           | -2.218457               | 1.199454  | -1.429443 |
| 42            | 6             | 0           | -3.602837               | 1.145273  | -1.248603 |
| 43            | 6             | 0           | -1.685368               | 0.939836  | -2.686407 |
| 44            | 6             | 0           | -4.435694               | 0.846371  | -2.315767 |
| 45            | 1             | 0           | -4.027142               | 1.321267  | -0.266141 |

|    |   |   |           |           |           |
|----|---|---|-----------|-----------|-----------|
| 46 | 6 | 0 | -2.519753 | 0.628886  | -3.753340 |
| 47 | 1 | 0 | -0.612094 | 0.934844  | -2.814720 |
| 48 | 6 | 0 | -3.894896 | 0.582845  | -3.570555 |
| 49 | 1 | 0 | -5.509024 | 0.810209  | -2.165428 |
| 50 | 1 | 0 | -2.091218 | 0.407444  | -4.723763 |
| 51 | 1 | 0 | -4.545085 | 0.333020  | -4.401115 |
| 52 | 6 | 0 | -1.682352 | 3.255828  | 0.486273  |
| 53 | 6 | 0 | -1.170792 | 3.849265  | 1.646265  |
| 54 | 6 | 0 | -2.506627 | 4.021883  | -0.339141 |
| 55 | 6 | 0 | -1.512750 | 5.147859  | 1.992333  |
| 56 | 1 | 0 | -0.482673 | 3.308185  | 2.282060  |
| 57 | 6 | 0 | -2.833987 | 5.330528  | -0.000277 |
| 58 | 1 | 0 | -2.896611 | 3.607762  | -1.259753 |
| 59 | 6 | 0 | -2.347946 | 5.894340  | 1.169444  |
| 60 | 1 | 0 | -1.108708 | 5.581458  | 2.899735  |
| 61 | 1 | 0 | -3.471485 | 5.907608  | -0.660243 |
| 62 | 1 | 0 | -2.606002 | 6.913355  | 1.433814  |
| 63 | 6 | 0 | 1.267478  | -2.036129 | 1.200119  |
| 64 | 6 | 0 | 0.665852  | -3.295045 | 1.259875  |
| 65 | 6 | 0 | 2.049646  | -1.611126 | 2.273007  |
| 66 | 6 | 0 | 0.828490  | -4.101484 | 2.377963  |
| 67 | 1 | 0 | 0.064299  | -3.651587 | 0.432901  |
| 68 | 6 | 0 | 2.203730  | -2.415478 | 3.394946  |
| 69 | 1 | 0 | 2.571265  | -0.664480 | 2.223965  |
| 70 | 6 | 0 | 1.591344  | -3.660540 | 3.452997  |
| 71 | 1 | 0 | 0.361311  | -5.080095 | 2.402804  |
| 72 | 1 | 0 | 2.813239  | -2.066443 | 4.220179  |
| 73 | 1 | 0 | 1.717493  | -4.289833 | 4.327182  |
| 74 | 6 | 0 | 2.464231  | -1.731390 | -1.373960 |
| 75 | 6 | 0 | 2.747998  | -1.143456 | -2.607265 |
| 76 | 6 | 0 | 3.200495  | -2.844631 | -0.975611 |
| 77 | 6 | 0 | 3.732145  | -1.664511 | -3.432352 |
| 78 | 1 | 0 | 2.200147  | -0.264002 | -2.915231 |
| 79 | 6 | 0 | 4.196625  | -3.359298 | -1.797803 |
| 80 | 1 | 0 | 3.017686  | -3.309071 | -0.015462 |
| 81 | 6 | 0 | 4.463414  | -2.775142 | -3.027154 |
| 82 | 1 | 0 | 3.940945  | -1.190749 | -4.384732 |
| 83 | 1 | 0 | 4.770008  | -4.217688 | -1.466853 |
| 84 | 1 | 0 | 5.244767  | -3.175203 | -3.663341 |

-----

**L (NIMAG=0)**

| Center<br>Number | Atomic<br>Number | Atomic<br>Type | Coordinates (Angstroms) |           |           |
|------------------|------------------|----------------|-------------------------|-----------|-----------|
|                  |                  |                | X                       | Y         | Z         |
| 1                | 44               | 0              | 1.274442                | 1.369866  | -0.094386 |
| 2                | 53               | 0              | 4.054120                | 0.956735  | 0.312531  |
| 3                | 15               | 0              | -1.060213               | 1.624503  | -0.065178 |
| 4                | 15               | 0              | 1.107373                | -1.023756 | -0.311596 |
| 5                | 8                | 0              | -2.977801               | -2.147901 | 4.102176  |
| 6                | 8                | 0              | -2.481374               | -2.988515 | 2.030443  |

|    |   |   |           |           |           |
|----|---|---|-----------|-----------|-----------|
| 7  | 8 | 0 | -4.082148 | -1.941072 | -0.511256 |
| 8  | 8 | 0 | -4.038522 | -2.976516 | -2.566203 |
| 9  | 8 | 0 | 1.213869  | 1.587027  | 2.907561  |
| 10 | 6 | 0 | -1.781705 | 0.537650  | 1.238706  |
| 11 | 6 | 0 | -2.131488 | 1.035679  | 2.487172  |
| 12 | 1 | 0 | -2.095895 | 2.099205  | 2.671406  |
| 13 | 6 | 0 | -2.542640 | 0.209847  | 3.540371  |
| 14 | 1 | 0 | -2.812290 | 0.614900  | 4.506347  |
| 15 | 6 | 0 | -2.585773 | -1.133851 | 3.285266  |
| 16 | 6 | 0 | -2.639345 | -3.337749 | 3.398511  |
| 17 | 1 | 0 | -3.449305 | -4.059053 | 3.495851  |
| 18 | 1 | 0 | -1.689331 | -3.728235 | 3.783534  |
| 19 | 6 | 0 | -2.271884 | -1.642266 | 2.032538  |
| 20 | 6 | 0 | -1.860922 | -0.857343 | 0.980453  |
| 21 | 6 | 0 | -1.677274 | -1.504349 | -0.348595 |
| 22 | 6 | 0 | -2.801928 | -2.000619 | -0.966707 |
| 23 | 6 | 0 | -4.895804 | -2.504603 | -1.530532 |
| 24 | 1 | 0 | -5.463129 | -3.342906 | -1.119322 |
| 25 | 1 | 0 | -5.556897 | -1.731956 | -1.934367 |
| 26 | 6 | 0 | -2.776614 | -2.627382 | -2.202081 |
| 27 | 6 | 0 | -1.602685 | -2.818320 | -2.879929 |
| 28 | 1 | 0 | -1.575436 | -3.313815 | -3.841285 |
| 29 | 6 | 0 | -0.438780 | -2.336016 | -2.268307 |
| 30 | 1 | 0 | 0.502240  | -2.482915 | -2.780722 |
| 31 | 6 | 0 | -0.452240 | -1.687327 | -1.038279 |
| 32 | 6 | 0 | 1.247276  | 1.439540  | 1.770346  |
| 33 | 6 | 0 | 1.623903  | 3.554896  | -0.298225 |
| 34 | 1 | 0 | 2.369133  | 3.987743  | 0.360881  |
| 35 | 1 | 0 | 0.674724  | 4.075311  | -0.318250 |
| 36 | 6 | 0 | 2.087946  | 2.926362  | -1.477372 |
| 37 | 6 | 0 | 1.222987  | 2.217709  | -2.307809 |
| 38 | 1 | 0 | 3.154148  | 2.802812  | -1.620447 |
| 39 | 1 | 0 | 0.204970  | 2.569589  | -2.425237 |
| 40 | 1 | 0 | 1.628240  | 1.700137  | -3.170223 |
| 41 | 6 | 0 | -2.176444 | 1.208466  | -1.475357 |
| 42 | 6 | 0 | -3.557290 | 1.263059  | -1.263125 |
| 43 | 6 | 0 | -1.700352 | 0.783542  | -2.711642 |
| 44 | 6 | 0 | -4.439904 | 0.926521  | -2.277780 |
| 45 | 1 | 0 | -3.943443 | 1.558763  | -0.293848 |
| 46 | 6 | 0 | -2.585447 | 0.435461  | -3.724680 |
| 47 | 1 | 0 | -0.636416 | 0.676141  | -2.868841 |
| 48 | 6 | 0 | -3.955004 | 0.511585  | -3.513815 |
| 49 | 1 | 0 | -5.508121 | 0.981029  | -2.099198 |
| 50 | 1 | 0 | -2.198888 | 0.087169  | -4.675208 |
| 51 | 1 | 0 | -4.643111 | 0.236941  | -4.305289 |
| 52 | 6 | 0 | -1.604825 | 3.338342  | 0.354191  |
| 53 | 6 | 0 | -2.386202 | 4.099321  | -0.514819 |
| 54 | 6 | 0 | -1.102585 | 3.954323  | 1.507117  |
| 55 | 6 | 0 | -2.690584 | 5.424969  | -0.220706 |
| 56 | 1 | 0 | -2.758683 | 3.669531  | -1.435333 |
| 57 | 6 | 0 | -1.421449 | 5.268743  | 1.808080  |
| 58 | 1 | 0 | -0.427365 | 3.420029  | 2.163379  |
| 59 | 6 | 0 | -2.221498 | 6.009767  | 0.945016  |

|    |   |   |           |           |           |
|----|---|---|-----------|-----------|-----------|
| 60 | 1 | 0 | -3.295549 | 5.998335  | -0.913704 |
| 61 | 1 | 0 | -1.024881 | 5.720847  | 2.709701  |
| 62 | 1 | 0 | -2.461182 | 7.041722  | 1.174129  |
| 63 | 6 | 0 | 1.218136  | -2.045903 | 1.223356  |
| 64 | 6 | 0 | 0.564203  | -3.277443 | 1.311870  |
| 65 | 6 | 0 | 2.019865  | -1.634606 | 2.287250  |
| 66 | 6 | 0 | 0.700388  | -4.070585 | 2.443154  |
| 67 | 1 | 0 | -0.061593 | -3.622710 | 0.498309  |
| 68 | 6 | 0 | 2.146569  | -2.424111 | 3.422805  |
| 69 | 1 | 0 | 2.574928  | -0.708576 | 2.223641  |
| 70 | 6 | 0 | 1.486337  | -3.642834 | 3.506316  |
| 71 | 1 | 0 | 0.190908  | -5.027119 | 2.488113  |
| 72 | 1 | 0 | 2.771897  | -2.083454 | 4.239693  |
| 73 | 1 | 0 | 1.591223  | -4.260754 | 4.391368  |
| 74 | 6 | 0 | 2.374844  | -1.809642 | -1.391304 |
| 75 | 6 | 0 | 2.812293  | -1.114060 | -2.517003 |
| 76 | 6 | 0 | 2.883801  | -3.082929 | -1.144014 |
| 77 | 6 | 0 | 3.720620  | -1.686334 | -3.394849 |
| 78 | 1 | 0 | 2.451972  | -0.108621 | -2.687296 |
| 79 | 6 | 0 | 3.803802  | -3.651684 | -2.016784 |
| 80 | 1 | 0 | 2.577508  | -3.634758 | -0.264455 |
| 81 | 6 | 0 | 4.219386  | -2.959302 | -3.146026 |
| 82 | 1 | 0 | 4.055415  | -1.128461 | -4.261828 |
| 83 | 1 | 0 | 4.200373  | -4.638508 | -1.806648 |
| 84 | 1 | 0 | 4.940279  | -3.403897 | -3.822851 |

-----

### M (NIMAG=0)

| Center<br>Number | Atomic<br>Number | Atomic<br>Type | Coordinates (Angstroms) |           |           |
|------------------|------------------|----------------|-------------------------|-----------|-----------|
|                  |                  |                | X                       | Y         | Z         |
| 1                | 44               | 0              | 0.645475                | -1.683466 | -0.860384 |
| 2                | 53               | 0              | 1.307495                | -2.763459 | 1.736983  |
| 3                | 15               | 0              | 1.751668                | 0.290931  | -0.126074 |
| 4                | 15               | 0              | -1.559939               | -0.869482 | -0.317160 |
| 5                | 8                | 0              | -2.233102               | 3.104916  | 1.932236  |
| 6                | 8                | 0              | -1.467600               | 2.956695  | 4.097052  |
| 7                | 8                | 0              | -0.773907               | 4.321771  | -0.595297 |
| 8                | 8                | 0              | -1.935604               | 4.634987  | -2.546909 |
| 9                | 8                | 0              | 0.186959                | -0.513005 | -3.567639 |
| 10               | 6                | 0              | 0.800232                | 1.161695  | 1.182910  |
| 11               | 6                | 0              | -0.429113               | 1.811258  | 0.891407  |
| 12               | 6                | 0              | -1.066907               | 2.402371  | 1.959282  |
| 13               | 6                | 0              | -0.607809               | 2.315442  | 3.262614  |
| 14               | 6                | 0              | 0.544132                | 1.641361  | 3.569491  |
| 15               | 1                | 0              | 0.894713                | 1.546764  | 4.588291  |
| 16               | 6                | 0              | 1.243591                | 1.074610  | 2.498843  |
| 17               | 1                | 0              | 2.155702                | 0.534981  | 2.714440  |
| 18               | 6                | 0              | -2.548104               | 3.405516  | 3.285429  |
| 19               | 1                | 0              | -3.459450               | 2.871644  | 3.570492  |
| 20               | 1                | 0              | -2.660681               | 4.486308  | 3.398701  |

|    |   |   |           |           |           |
|----|---|---|-----------|-----------|-----------|
| 21 | 6 | 0 | -1.112690 | 1.896047  | -0.429933 |
| 22 | 6 | 0 | -1.765847 | 0.807947  | -1.070057 |
| 23 | 6 | 0 | -2.497657 | 1.020288  | -2.230569 |
| 24 | 1 | 0 | -3.017159 | 0.194904  | -2.695922 |
| 25 | 6 | 0 | -2.616468 | 2.282975  | -2.825994 |
| 26 | 1 | 0 | -3.183211 | 2.430260  | -3.735487 |
| 27 | 6 | 0 | -1.987837 | 3.321014  | -2.193730 |
| 28 | 6 | 0 | -1.276399 | 3.127378  | -1.019477 |
| 29 | 6 | 0 | 0.360898  | -0.940720 | -2.513624 |
| 30 | 6 | 0 | 2.310936  | -2.993078 | -1.595721 |
| 31 | 6 | 0 | 1.077999  | -3.447315 | -2.125679 |
| 32 | 1 | 0 | 0.881454  | -3.284449 | -3.183403 |
| 33 | 6 | 0 | 0.000166  | -3.814296 | -1.308063 |
| 34 | 1 | 0 | 0.169419  | -4.308435 | -0.361095 |
| 35 | 1 | 0 | -0.960322 | -3.997412 | -1.775219 |
| 36 | 6 | 0 | -1.383167 | 5.303963  | -1.421399 |
| 37 | 1 | 0 | -0.628228 | 6.014414  | -1.757352 |
| 38 | 1 | 0 | -2.184817 | 5.800884  | -0.861081 |
| 39 | 1 | 0 | 3.051272  | -2.613965 | -2.292744 |
| 40 | 1 | 0 | 2.708535  | -3.479300 | -0.713379 |
| 41 | 6 | 0 | -2.828960 | -1.939082 | -1.126972 |
| 42 | 6 | 0 | -3.796065 | -2.601916 | -0.372244 |
| 43 | 6 | 0 | -2.753987 | -2.212902 | -2.497568 |
| 44 | 6 | 0 | -4.677086 | -3.495179 | -0.973622 |
| 45 | 1 | 0 | -3.864804 | -2.435382 | 0.694924  |
| 46 | 6 | 0 | -3.645849 | -3.087383 | -3.099429 |
| 47 | 1 | 0 | -1.986095 | -1.754091 | -3.107531 |
| 48 | 6 | 0 | -4.613088 | -3.733964 | -2.337658 |
| 49 | 1 | 0 | -5.415128 | -4.004874 | -0.364919 |
| 50 | 1 | 0 | -3.574116 | -3.274539 | -4.164802 |
| 51 | 1 | 0 | -5.303344 | -4.426691 | -2.805194 |
| 52 | 6 | 0 | -2.362089 | -0.540431 | 1.310463  |
| 53 | 6 | 0 | -1.815365 | -0.962649 | 2.516075  |
| 54 | 6 | 0 | -3.573396 | 0.160742  | 1.316982  |
| 55 | 6 | 0 | -2.466050 | -0.686447 | 3.714612  |
| 56 | 1 | 0 | -0.875088 | -1.496715 | 2.525873  |
| 57 | 6 | 0 | -4.227682 | 0.419090  | 2.510399  |
| 58 | 1 | 0 | -4.004319 | 0.508996  | 0.384891  |
| 59 | 6 | 0 | -3.671723 | -0.001673 | 3.716015  |
| 60 | 1 | 0 | -2.019660 | -1.011337 | 4.647217  |
| 61 | 1 | 0 | -5.170112 | 0.955731  | 2.500180  |
| 62 | 1 | 0 | -4.179219 | 0.206827  | 4.651659  |
| 63 | 6 | 0 | 2.075490  | 1.577824  | -1.406416 |
| 64 | 6 | 0 | 1.900003  | 2.939930  | -1.177871 |
| 65 | 6 | 0 | 2.643239  | 1.163682  | -2.611382 |
| 66 | 6 | 0 | 2.242540  | 3.866976  | -2.154044 |
| 67 | 1 | 0 | 1.486243  | 3.290693  | -0.241303 |
| 68 | 6 | 0 | 2.995759  | 2.089527  | -3.582038 |
| 69 | 1 | 0 | 2.818013  | 0.108282  | -2.789830 |
| 70 | 6 | 0 | 2.786864  | 3.445308  | -3.359409 |
| 71 | 1 | 0 | 2.088714  | 4.923279  | -1.963255 |
| 72 | 1 | 0 | 3.430226  | 1.750344  | -4.515262 |
| 73 | 1 | 0 | 3.053870  | 4.169344  | -4.120860 |

|    |   |   |          |           |          |
|----|---|---|----------|-----------|----------|
| 74 | 6 | 0 | 3.469074 | 0.222530  | 0.540111 |
| 75 | 6 | 0 | 4.071504 | 1.388378  | 1.023371 |
| 76 | 6 | 0 | 4.219723 | -0.944337 | 0.466437 |
| 77 | 6 | 0 | 5.391803 | 1.375732  | 1.443059 |
| 78 | 1 | 0 | 3.506974 | 2.312506  | 1.073346 |
| 79 | 6 | 0 | 5.548100 | -0.954609 | 0.878944 |
| 80 | 1 | 0 | 3.761330 | -1.850328 | 0.101256 |
| 81 | 6 | 0 | 6.134731 | 0.201164  | 1.370945 |
| 82 | 1 | 0 | 5.844151 | 2.285257  | 1.821688 |
| 83 | 1 | 0 | 6.117706 | -1.874900 | 0.821318 |
| 84 | 1 | 0 | 7.168702 | 0.191578  | 1.697233 |

-----  
**N (NIMAG=0)**  
 -----

| Center<br>Number | Atomic<br>Number | Atomic<br>Type | Coordinates (Angstroms) |           |           |
|------------------|------------------|----------------|-------------------------|-----------|-----------|
|                  |                  |                | X                       | Y         | Z         |
| 1                | 44               | 0              | 0.593285                | -1.671406 | -0.874032 |
| 2                | 53               | 0              | 0.915058                | -2.939427 | 1.681225  |
| 3                | 15               | 0              | 1.786495                | 0.217145  | -0.071284 |
| 4                | 15               | 0              | -1.569230               | -0.780839 | -0.324686 |
| 5                | 8                | 0              | -2.082688               | 3.272405  | 1.841434  |
| 6                | 8                | 0              | -1.345119               | 3.174246  | 4.017662  |
| 7                | 8                | 0              | -0.510184               | 4.356152  | -0.667838 |
| 8                | 8                | 0              | -1.661993               | 4.710469  | -2.618034 |
| 9                | 8                | 0              | 0.204156                | -0.491226 | -3.588106 |
| 10               | 6                | 0              | 0.869069                | 1.173545  | 1.199160  |
| 11               | 6                | 0              | -0.325139               | 1.868732  | 0.867544  |
| 12               | 6                | 0              | -0.947839               | 2.523527  | 1.906568  |
| 13               | 6                | 0              | -0.504697               | 2.466890  | 3.217719  |
| 14               | 6                | 0              | 0.614569                | 1.757633  | 3.562542  |
| 15               | 1                | 0              | 0.952618                | 1.690179  | 4.587794  |
| 16               | 6                | 0              | 1.297240                | 1.118261  | 2.521454  |
| 17               | 1                | 0              | 2.185278                | 0.550894  | 2.765948  |
| 18               | 6                | 0              | -2.414573               | 3.607051  | 3.182495  |
| 19               | 1                | 0              | -3.331638               | 3.082778  | 3.467926  |
| 20               | 1                | 0              | -2.523671               | 4.690166  | 3.268285  |
| 21               | 6                | 0              | -0.987601               | 1.956758  | -0.466066 |
| 22               | 6                | 0              | -1.702364               | 0.898210  | -1.091669 |
| 23               | 6                | 0              | -2.431236               | 1.139286  | -2.248109 |
| 24               | 1                | 0              | -3.003939               | 0.341017  | -2.697276 |
| 25               | 6                | 0              | -2.482808               | 2.399188  | -2.859136 |
| 26               | 1                | 0              | -3.050876               | 2.567987  | -3.764065 |
| 27               | 6                | 0              | -1.786454               | 3.405813  | -2.248097 |
| 28               | 6                | 0              | -1.079629               | 3.186135  | -1.075553 |
| 29               | 6                | 0              | 0.360623                | -0.909203 | -2.529243 |
| 30               | 6                | 0              | -0.110859               | -3.575069 | -1.869605 |
| 31               | 6                | 0              | 1.244535                | -3.694365 | -1.512335 |
| 32               | 1                | 0              | 1.482192                | -4.323381 | -0.663982 |
| 33               | 6                | 0              | 2.246062                | -2.808682 | -1.955737 |
| 34               | 1                | 0              | 2.247764                | -2.449569 | -2.980188 |
| 35               | 1                | 0              | 3.231943                | -2.897303 | -1.514196 |
| 36               | 6                | 0              | -1.068607               | 5.360856  | -1.502711 |

|    |   |   |           |           |           |
|----|---|---|-----------|-----------|-----------|
| 37 | 1 | 0 | -0.277411 | 6.024989  | -1.849799 |
| 38 | 1 | 0 | -1.839234 | 5.907123  | -0.944789 |
| 39 | 1 | 0 | -0.393033 | -3.311502 | -2.883170 |
| 40 | 1 | 0 | -0.832671 | -4.188182 | -1.341152 |
| 41 | 6 | 0 | -2.872407 | -1.827990 | -1.104429 |
| 42 | 6 | 0 | -3.783008 | -2.524715 | -0.309786 |
| 43 | 6 | 0 | -2.872714 | -2.067946 | -2.482493 |
| 44 | 6 | 0 | -4.685117 | -3.416152 | -0.880295 |
| 45 | 1 | 0 | -3.789050 | -2.385040 | 0.763630  |
| 46 | 6 | 0 | -3.786309 | -2.941364 | -3.052375 |
| 47 | 1 | 0 | -2.145022 | -1.586797 | -3.123820 |
| 48 | 6 | 0 | -4.698271 | -3.619833 | -2.251842 |
| 49 | 1 | 0 | -5.378408 | -3.952337 | -0.242458 |
| 50 | 1 | 0 | -3.774030 | -3.103215 | -4.124198 |
| 51 | 1 | 0 | -5.405413 | -4.311204 | -2.695616 |
| 52 | 6 | 0 | -2.370926 | -0.380822 | 1.292870  |
| 53 | 6 | 0 | -1.813782 | -0.688047 | 2.527868  |
| 54 | 6 | 0 | -3.599673 | 0.288512  | 1.248137  |
| 55 | 6 | 0 | -2.477254 | -0.344560 | 3.701712  |
| 56 | 1 | 0 | -0.855956 | -1.185272 | 2.579904  |
| 57 | 6 | 0 | -4.264651 | 0.618591  | 2.417632  |
| 58 | 1 | 0 | -4.038865 | 0.553477  | 0.292715  |
| 59 | 6 | 0 | -3.703726 | 0.299853  | 3.651827  |
| 60 | 1 | 0 | -2.023165 | -0.584055 | 4.656183  |
| 61 | 1 | 0 | -5.220290 | 1.128550  | 2.365883  |
| 62 | 1 | 0 | -4.221987 | 0.558324  | 4.568987  |
| 63 | 6 | 0 | 2.238164  | 1.467739  | -1.347560 |
| 64 | 6 | 0 | 2.118839  | 2.840095  | -1.145651 |
| 65 | 6 | 0 | 2.820407  | 1.007303  | -2.529138 |
| 66 | 6 | 0 | 2.537107  | 3.734196  | -2.123604 |
| 67 | 1 | 0 | 1.689787  | 3.224588  | -0.229319 |
| 68 | 6 | 0 | 3.248560  | 1.899768  | -3.500414 |
| 69 | 1 | 0 | 2.944621  | -0.058221 | -2.687688 |
| 70 | 6 | 0 | 3.099655  | 3.267729  | -3.303569 |
| 71 | 1 | 0 | 2.426620  | 4.799474  | -1.954005 |
| 72 | 1 | 0 | 3.694447  | 1.525581  | -4.414707 |
| 73 | 1 | 0 | 3.425699  | 3.965843  | -4.066248 |
| 74 | 6 | 0 | 3.463223  | 0.003908  | 0.665665  |
| 75 | 6 | 0 | 4.204515  | 1.131290  | 1.035245  |
| 76 | 6 | 0 | 4.037826  | -1.254786 | 0.799623  |
| 77 | 6 | 0 | 5.487961  | 0.995645  | 1.538923  |
| 78 | 1 | 0 | 3.777871  | 2.122048  | 0.927794  |
| 79 | 6 | 0 | 5.329111  | -1.390193 | 1.299888  |
| 80 | 1 | 0 | 3.465894  | -2.134143 | 0.540687  |
| 81 | 6 | 0 | 6.054803  | -0.268744 | 1.670961  |
| 82 | 1 | 0 | 6.049655  | 1.877898  | 1.824112  |
| 83 | 1 | 0 | 5.759281  | -2.379518 | 1.404728  |
| 84 | 1 | 0 | 7.060265  | -0.374904 | 2.062734  |

-----  
**B (NIMAG=0)**

-----  
Center    Atomic    Atomic    Coordinates (Angstroms)

| Number | Number | Type | X         | Y         | Z         |
|--------|--------|------|-----------|-----------|-----------|
| 1      | 44     | 0    | 1.384312  | 1.003685  | 0.398758  |
| 2      | 53     | 0    | 3.996712  | 0.032519  | 0.885240  |
| 3      | 15     | 0    | -0.852336 | 1.672405  | 0.294510  |
| 4      | 15     | 0    | 0.862293  | -1.256660 | -0.343968 |
| 5      | 8      | 0    | -3.522447 | -2.465309 | 3.608838  |
| 6      | 8      | 0    | -3.051576 | -2.982912 | 1.429492  |
| 7      | 8      | 0    | -4.359343 | -1.192572 | -0.978112 |
| 8      | 8      | 0    | -4.329572 | -1.877238 | -3.168398 |
| 9      | 8      | 0    | 1.048605  | 0.679040  | 3.330607  |
| 10     | 6      | 0    | -1.846555 | 0.493732  | 1.309212  |
| 11     | 6      | 0    | -2.187578 | 0.806767  | 2.618940  |
| 12     | 1      | 0    | -2.001395 | 1.802153  | 2.996861  |
| 13     | 6      | 0    | -2.758334 | -0.125152 | 3.494449  |
| 14     | 1      | 0    | -3.013083 | 0.135744  | 4.512709  |
| 15     | 6      | 0    | -2.966366 | -1.383681 | 2.999124  |
| 16     | 6      | 0    | -3.291928 | -3.545919 | 2.711581  |
| 17     | 1      | 0    | -4.178539 | -4.176375 | 2.669201  |
| 18     | 1      | 0    | -2.402443 | -4.102355 | 3.032731  |
| 19     | 6      | 0    | -2.665099 | -1.700337 | 1.681274  |
| 20     | 6      | 0    | -2.103306 | -0.807865 | 0.798941  |
| 21     | 6      | 0    | -1.935635 | -1.247253 | -0.614708 |
| 22     | 6      | 0    | -3.075448 | -1.437427 | -1.360265 |
| 23     | 6      | 0    | -5.170242 | -1.678327 | -2.037362 |
| 24     | 1      | 0    | -5.618364 | -2.635264 | -1.743216 |
| 25     | 1      | 0    | -5.931692 | -0.937005 | -2.279832 |
| 26     | 6      | 0    | -3.058646 | -1.855951 | -2.681615 |
| 27     | 6      | 0    | -1.884171 | -2.145479 | -3.323004 |
| 28     | 1      | 0    | -1.865026 | -2.477991 | -4.352370 |
| 29     | 6      | 0    | -0.708142 | -1.975992 | -2.582713 |
| 30     | 1      | 0    | 0.232878  | -2.206292 | -3.063206 |
| 31     | 6      | 0    | -0.710639 | -1.529233 | -1.265176 |
| 32     | 6      | 0    | 1.165410  | 0.764607  | 2.188825  |
| 33     | 6      | 0    | 2.198398  | 2.974827  | 0.605850  |
| 34     | 1      | 0    | 3.013201  | 3.018865  | 1.323721  |
| 35     | 1      | 0    | 1.476359  | 3.772562  | 0.757998  |
| 36     | 6      | 0    | 2.623747  | 2.721750  | -0.759254 |
| 37     | 6      | 0    | 1.920118  | 2.963640  | -1.902056 |
| 38     | 6      | 0    | 2.467743  | 2.540573  | -3.237417 |
| 39     | 1      | 0    | 3.344053  | 1.898271  | -3.132818 |
| 40     | 1      | 0    | 1.712124  | 2.011624  | -3.830991 |
| 41     | 1      | 0    | 2.755390  | 3.422343  | -3.822313 |
| 42     | 6      | 0    | 0.779512  | 3.939272  | -1.973371 |
| 43     | 1      | 0    | 0.003961  | 3.627246  | -2.675159 |
| 44     | 1      | 0    | 0.319576  | 4.133894  | -1.006940 |
| 45     | 1      | 0    | 1.177813  | 4.892500  | -2.343326 |
| 46     | 1      | 0    | 3.576431  | 2.216967  | -0.882790 |
| 47     | 6      | 0    | -1.804341 | 1.659600  | -1.278306 |
| 48     | 6      | 0    | -3.191203 | 1.822116  | -1.260386 |
| 49     | 6      | 0    | -1.168402 | 1.400432  | -2.487653 |
| 50     | 6      | 0    | -3.920739 | 1.759406  | -2.438594 |
| 51     | 1      | 0    | -3.705914 | 1.970958  | -0.317461 |



|    |   |   |           |           |           |
|----|---|---|-----------|-----------|-----------|
| 52 | 6 | 0 | -1.899038 | 1.324817  | -3.665761 |
| 53 | 1 | 0 | -0.098609 | 1.225243  | -2.497101 |
| 54 | 6 | 0 | -3.275218 | 1.510751  | -3.644387 |
| 55 | 1 | 0 | -4.996795 | 1.888666  | -2.411631 |
| 56 | 1 | 0 | -1.393294 | 1.102606  | -4.598247 |
| 57 | 1 | 0 | -3.846780 | 1.442450  | -4.562775 |
| 58 | 6 | 0 | -1.228308 | 3.332573  | 1.013082  |
| 59 | 6 | 0 | -2.014903 | 4.285177  | 0.364266  |
| 60 | 6 | 0 | -0.632585 | 3.681776  | 2.229966  |
| 61 | 6 | 0 | -2.223710 | 5.538212  | 0.929111  |
| 62 | 1 | 0 | -2.455690 | 4.067128  | -0.599319 |
| 63 | 6 | 0 | -0.853962 | 4.926502  | 2.800536  |
| 64 | 1 | 0 | 0.027036  | 2.986276  | 2.732898  |
| 65 | 6 | 0 | -1.653158 | 5.859998  | 2.151928  |
| 66 | 1 | 0 | -2.832950 | 6.264607  | 0.403453  |
| 67 | 1 | 0 | -0.384187 | 5.170695  | 3.746162  |
| 68 | 1 | 0 | -1.817357 | 6.837200  | 2.591403  |
| 69 | 6 | 0 | 0.731277  | -2.598288 | 0.914511  |
| 70 | 6 | 0 | -0.031754 | -3.740066 | 0.654974  |
| 71 | 6 | 0 | 1.415696  | -2.506981 | 2.125592  |
| 72 | 6 | 0 | -0.109176 | -4.764408 | 1.588586  |
| 73 | 1 | 0 | -0.576993 | -3.830663 | -0.276511 |
| 74 | 6 | 0 | 1.328319  | -3.528165 | 3.063182  |
| 75 | 1 | 0 | 2.041555  | -1.650357 | 2.333223  |
| 76 | 6 | 0 | 0.566289  | -4.658579 | 2.798883  |
| 77 | 1 | 0 | -0.702156 | -5.645185 | 1.367496  |
| 78 | 1 | 0 | 1.865374  | -3.436743 | 3.999950  |
| 79 | 1 | 0 | 0.503983  | -5.457272 | 3.530021  |
| 80 | 6 | 0 | 2.095536  | -1.893977 | -1.542917 |
| 81 | 6 | 0 | 2.541701  | -1.007771 | -2.522733 |
| 82 | 6 | 0 | 2.590109  | -3.193632 | -1.524942 |
| 83 | 6 | 0 | 3.451032  | -1.416111 | -3.484787 |
| 84 | 1 | 0 | 2.184057  | 0.016054  | -2.514843 |
| 85 | 6 | 0 | 3.514992  | -3.599842 | -2.481169 |
| 86 | 1 | 0 | 2.270555  | -3.888716 | -0.758014 |
| 87 | 6 | 0 | 3.942408  | -2.717330 | -3.463538 |
| 88 | 1 | 0 | 3.791224  | -0.714809 | -4.238561 |
| 89 | 1 | 0 | 3.906812  | -4.610161 | -2.451126 |
| 90 | 1 | 0 | 4.666564  | -3.037357 | -4.204116 |

○ (NIMAG=0)

| Center<br>Number | Atomic<br>Number | Atomic<br>Type | Coordinates (Angstroms) |           |           |
|------------------|------------------|----------------|-------------------------|-----------|-----------|
|                  |                  |                | X                       | Y         | Z         |
| 1                | 44               | 0              | 1.497663                | 0.932514  | -0.118647 |
| 2                | 53               | 0              | 3.990616                | -0.378787 | 0.448178  |
| 3                | 15               | 0              | -0.708376               | 1.703430  | 0.045307  |
| 4                | 15               | 0              | 0.734555                | -1.334404 | -0.320376 |
| 5                | 8                | 0              | -3.614059               | -1.814321 | 3.867274  |
| 6                | 8                | 0              | -3.373142               | -2.530161 | 1.698589  |
| 7                | 8                | 0              | -4.503733               | -0.947458 | -0.759340 |

|    |   |   |           |           |           |
|----|---|---|-----------|-----------|-----------|
| 8  | 8 | 0 | -4.614509 | -1.750649 | -2.912525 |
| 9  | 8 | 0 | 1.774552  | 1.439429  | 2.850198  |
| 10 | 6 | 0 | -1.654383 | 0.697266  | 1.273921  |
| 11 | 6 | 0 | -1.835297 | 1.125767  | 2.583228  |
| 12 | 1 | 0 | -1.495476 | 2.104525  | 2.883699  |
| 13 | 6 | 0 | -2.471879 | 0.343358  | 3.554061  |
| 14 | 1 | 0 | -2.602071 | 0.695630  | 4.568392  |
| 15 | 6 | 0 | -2.932107 | -0.881433 | 3.152441  |
| 16 | 6 | 0 | -3.726755 | -2.946334 | 3.010580  |
| 17 | 1 | 0 | -4.758662 | -3.298478 | 3.011178  |
| 18 | 1 | 0 | -3.029644 | -3.722297 | 3.344589  |
| 19 | 6 | 0 | -2.780769 | -1.313577 | 1.844429  |
| 20 | 6 | 0 | -2.137214 | -0.577271 | 0.876789  |
| 21 | 6 | 0 | -2.074584 | -1.130318 | -0.501077 |
| 22 | 6 | 0 | -3.257069 | -1.285453 | -1.186374 |
| 23 | 6 | 0 | -5.394299 | -1.323015 | -1.800329 |
| 24 | 1 | 0 | -6.025045 | -2.150070 | -1.458003 |
| 25 | 1 | 0 | -5.993166 | -0.457706 | -2.092680 |
| 26 | 6 | 0 | -3.325466 | -1.774055 | -2.480055 |
| 27 | 6 | 0 | -2.200498 | -2.180215 | -3.145839 |
| 28 | 1 | 0 | -2.246816 | -2.575928 | -4.151696 |
| 29 | 6 | 0 | -0.985243 | -2.061300 | -2.459745 |
| 30 | 1 | 0 | -0.092650 | -2.409962 | -2.958151 |
| 31 | 6 | 0 | -0.896226 | -1.541897 | -1.172950 |
| 32 | 6 | 0 | 1.631936  | 1.205836  | 1.733467  |
| 33 | 6 | 0 | 2.030706  | 1.143584  | -2.292856 |
| 34 | 1 | 0 | 1.376550  | 0.841620  | -3.102933 |
| 35 | 1 | 0 | 3.032923  | 0.734903  | -2.357124 |
| 36 | 6 | 0 | 1.827783  | 2.423898  | -1.730715 |
| 37 | 6 | 0 | 2.644729  | 2.959204  | -0.718442 |
| 38 | 6 | 0 | 2.259827  | 4.286587  | -0.104346 |
| 39 | 1 | 0 | 1.217302  | 4.546209  | -0.272618 |
| 40 | 1 | 0 | 2.447279  | 4.293636  | 0.971934  |
| 41 | 1 | 0 | 2.878408  | 5.079144  | -0.541683 |
| 42 | 6 | 0 | 4.146957  | 2.789473  | -0.744600 |
| 43 | 1 | 0 | 4.565142  | 2.741812  | 0.262172  |
| 44 | 1 | 0 | 4.480139  | 1.904944  | -1.278929 |
| 45 | 1 | 0 | 4.567677  | 3.673148  | -1.241885 |
| 46 | 1 | 0 | 0.915398  | 2.962062  | -1.981567 |
| 47 | 6 | 0 | -1.899280 | 1.702553  | -1.360514 |
| 48 | 6 | 0 | -3.245986 | 1.986737  | -1.118077 |
| 49 | 6 | 0 | -1.491954 | 1.410864  | -2.656451 |
| 50 | 6 | 0 | -4.161370 | 1.983523  | -2.158493 |
| 51 | 1 | 0 | -3.580157 | 2.197977  | -0.108302 |
| 52 | 6 | 0 | -2.411772 | 1.395655  | -3.698474 |
| 53 | 1 | 0 | -0.460702 | 1.152514  | -2.844252 |
| 54 | 6 | 0 | -3.746903 | 1.682635  | -3.452309 |
| 55 | 1 | 0 | -5.203148 | 2.206508  | -1.956521 |
| 56 | 1 | 0 | -2.083449 | 1.146007  | -4.700636 |
| 57 | 1 | 0 | -4.465227 | 1.664744  | -4.263963 |
| 58 | 6 | 0 | -0.878549 | 3.454330  | 0.619862  |
| 59 | 6 | 0 | -1.459690 | 4.425658  | -0.198883 |
| 60 | 6 | 0 | -0.306510 | 3.869710  | 1.826981  |

|    |   |   |           |           |           |
|----|---|---|-----------|-----------|-----------|
| 61 | 6 | 0 | -1.486237 | 5.761101  | 0.186325  |
| 62 | 1 | 0 | -1.885689 | 4.153668  | -1.155067 |
| 63 | 6 | 0 | -0.353838 | 5.198229  | 2.221115  |
| 64 | 1 | 0 | 0.218711  | 3.169224  | 2.459819  |
| 65 | 6 | 0 | -0.942896 | 6.151946  | 1.401053  |
| 66 | 1 | 0 | -1.934460 | 6.495656  | -0.472908 |
| 67 | 1 | 0 | 0.095231  | 5.489550  | 3.163565  |
| 68 | 1 | 0 | -0.966493 | 7.192977  | 1.702006  |
| 69 | 6 | 0 | 0.406726  | -2.322149 | 1.201981  |
| 70 | 6 | 0 | -0.360073 | -3.487845 | 1.120128  |
| 71 | 6 | 0 | 0.943152  | -1.952233 | 2.430641  |
| 72 | 6 | 0 | -0.586479 | -4.261706 | 2.247827  |
| 73 | 1 | 0 | -0.783808 | -3.792185 | 0.169931  |
| 74 | 6 | 0 | 0.697994  | -2.716423 | 3.565617  |
| 75 | 1 | 0 | 1.572785  | -1.078543 | 2.505809  |
| 76 | 6 | 0 | -0.066409 | -3.871465 | 3.477886  |
| 77 | 1 | 0 | -1.174409 | -5.169364 | 2.165062  |
| 78 | 1 | 0 | 1.117800  | -2.408960 | 4.516112  |
| 79 | 1 | 0 | -0.248704 | -4.472333 | 4.362245  |
| 80 | 6 | 0 | 1.830044  | -2.473935 | -1.276791 |
| 81 | 6 | 0 | 2.237956  | -2.124630 | -2.565378 |
| 82 | 6 | 0 | 2.312410  | -3.659651 | -0.726226 |
| 83 | 6 | 0 | 3.085812  | -2.945744 | -3.292667 |
| 84 | 1 | 0 | 1.901729  | -1.196203 | -3.002917 |
| 85 | 6 | 0 | 3.169868  | -4.477957 | -1.451278 |
| 86 | 1 | 0 | 2.049941  | -3.941567 | 0.284206  |
| 87 | 6 | 0 | 3.557174  | -4.128128 | -2.736139 |
| 88 | 1 | 0 | 3.390492  | -2.651457 | -4.290576 |
| 89 | 1 | 0 | 3.545380  | -5.388118 | -0.997809 |
| 90 | 1 | 0 | 4.231436  | -4.765372 | -3.296935 |

P (NIMAG=0)

| Center<br>Number | Atomic<br>Number | Atomic<br>Type | Coordinates (Angstroms) |           |           |
|------------------|------------------|----------------|-------------------------|-----------|-----------|
|                  |                  |                | X                       | Y         | Z         |
| 1                | 44               | 0              | 1.571614                | 0.867263  | -0.208026 |
| 2                | 53               | 0              | 4.094420                | -0.354745 | 0.404980  |
| 3                | 15               | 0              | -0.631792               | 1.731668  | -0.077948 |
| 4                | 15               | 0              | 0.730632                | -1.396511 | -0.276034 |
| 5                | 8                | 0              | -3.631890               | -1.388657 | 4.017316  |
| 6                | 8                | 0              | -3.435448               | -2.284316 | 1.913055  |
| 7                | 8                | 0              | -4.518773               | -0.918244 | -0.633779 |
| 8                | 8                | 0              | -4.669001               | -1.841369 | -2.736046 |
| 9                | 8                | 0              | 1.729929                | 1.290093  | 2.775604  |
| 10               | 6                | 0              | -1.568854               | 0.816931  | 1.233733  |
| 11               | 6                | 0              | -1.711714               | 1.348270  | 2.509799  |
| 12               | 1                | 0              | -1.313252               | 2.326095  | 2.734333  |
| 13               | 6                | 0              | -2.377794               | 0.674372  | 3.539662  |
| 14               | 1                | 0              | -2.477811               | 1.105570  | 4.526540  |

|    |   |   |           |           |           |
|----|---|---|-----------|-----------|-----------|
| 15 | 6 | 0 | -2.906632 | -0.549369 | 3.231138  |
| 16 | 6 | 0 | -3.784624 | -2.582315 | 3.258615  |
| 17 | 1 | 0 | -4.824894 | -2.905748 | 3.297562  |
| 18 | 1 | 0 | -3.104231 | -3.347040 | 3.649505  |
| 19 | 6 | 0 | -2.785859 | -1.087405 | 1.959713  |
| 20 | 6 | 0 | -2.115042 | -0.459487 | 0.935050  |
| 21 | 6 | 0 | -2.087601 | -1.111847 | -0.400125 |
| 22 | 6 | 0 | -3.282382 | -1.293734 | -1.058104 |
| 23 | 6 | 0 | -5.427359 | -1.322640 | -1.647551 |
| 24 | 1 | 0 | -6.084133 | -2.105835 | -1.255669 |
| 25 | 1 | 0 | -5.997690 | -0.455186 | -1.987972 |
| 26 | 6 | 0 | -3.374115 | -1.852664 | -2.322046 |
| 27 | 6 | 0 | -2.262618 | -2.292500 | -2.990448 |
| 28 | 1 | 0 | -2.328973 | -2.726748 | -3.979116 |
| 29 | 6 | 0 | -1.036046 | -2.152144 | -2.330126 |
| 30 | 1 | 0 | -0.145712 | -2.513491 | -2.827409 |
| 31 | 6 | 0 | -0.927563 | -1.582165 | -1.065944 |
| 32 | 6 | 0 | 1.650155  | 1.098440  | 1.645674  |
| 33 | 6 | 0 | 2.526630  | 2.916732  | -0.829463 |
| 34 | 6 | 0 | 2.830914  | 1.870346  | -1.732760 |
| 35 | 6 | 0 | 1.834672  | 1.237335  | -2.486916 |
| 36 | 1 | 0 | 3.820086  | 1.430022  | -1.708411 |
| 37 | 1 | 0 | 0.984719  | 1.822914  | -2.805982 |
| 38 | 1 | 0 | 2.113771  | 0.448532  | -3.173589 |
| 39 | 6 | 0 | 1.633541  | 4.037745  | -1.330416 |
| 40 | 1 | 0 | 0.753358  | 3.699508  | -1.877278 |
| 41 | 1 | 0 | 1.304955  | 4.691857  | -0.524691 |
| 42 | 1 | 0 | 2.230103  | 4.650171  | -2.018635 |
| 43 | 6 | 0 | 3.627561  | 3.443016  | 0.066410  |
| 44 | 1 | 0 | 4.195554  | 4.228686  | -0.448744 |
| 45 | 1 | 0 | 3.199247  | 3.893843  | 0.966579  |
| 46 | 1 | 0 | 4.317787  | 2.657352  | 0.373926  |
| 47 | 6 | 0 | -1.890678 | 1.670294  | -1.429104 |
| 48 | 6 | 0 | -3.210475 | 2.030905  | -1.136754 |
| 49 | 6 | 0 | -1.589304 | 1.213935  | -2.708005 |
| 50 | 6 | 0 | -4.191276 | 1.974887  | -2.114310 |
| 51 | 1 | 0 | -3.475705 | 2.341932  | -0.132514 |
| 52 | 6 | 0 | -2.574835 | 1.149002  | -3.686139 |
| 53 | 1 | 0 | -0.598480 | 0.847195  | -2.927221 |
| 54 | 6 | 0 | -3.874628 | 1.537192  | -3.396159 |
| 55 | 1 | 0 | -5.207875 | 2.261650  | -1.869253 |
| 56 | 1 | 0 | -2.324955 | 0.772640  | -4.671178 |
| 57 | 1 | 0 | -4.642311 | 1.482122  | -4.159648 |
| 58 | 6 | 0 | -0.757649 | 3.497107  | 0.475334  |
| 59 | 6 | 0 | -1.497815 | 4.449759  | -0.225163 |
| 60 | 6 | 0 | 0.002423  | 3.930518  | 1.566713  |
| 61 | 6 | 0 | -1.495099 | 5.784290  | 0.163434  |
| 62 | 1 | 0 | -2.061701 | 4.170614  | -1.104076 |
| 63 | 6 | 0 | -0.007475 | 5.259145  | 1.965235  |
| 64 | 1 | 0 | 0.633708  | 3.242197  | 2.108346  |
| 65 | 6 | 0 | -0.757051 | 6.194717  | 1.263410  |
| 66 | 1 | 0 | -2.069592 | 6.504708  | -0.407603 |
| 67 | 1 | 0 | 0.590121  | 5.562972  | 2.816907  |

|    |   |   |           |           |           |
|----|---|---|-----------|-----------|-----------|
| 68 | 1 | 0 | -0.754824 | 7.235922  | 1.564770  |
| 69 | 6 | 0 | 0.463198  | -2.297470 | 1.316324  |
| 70 | 6 | 0 | -0.507192 | -3.297330 | 1.425245  |
| 71 | 6 | 0 | 1.282466  | -2.040166 | 2.413449  |
| 72 | 6 | 0 | -0.651361 | -4.019288 | 2.601248  |
| 73 | 1 | 0 | -1.168430 | -3.509717 | 0.593819  |
| 74 | 6 | 0 | 1.124797  | -2.750591 | 3.596990  |
| 75 | 1 | 0 | 2.068459  | -1.301761 | 2.344556  |
| 76 | 6 | 0 | 0.159283  | -3.742603 | 3.695640  |
| 77 | 1 | 0 | -1.399493 | -4.802726 | 2.657239  |
| 78 | 1 | 0 | 1.769777  | -2.528890 | 4.439113  |
| 79 | 1 | 0 | 0.043602  | -4.302574 | 4.617020  |
| 80 | 6 | 0 | 1.704843  | -2.643998 | -1.235723 |
| 81 | 6 | 0 | 2.585423  | -2.223089 | -2.228760 |
| 82 | 6 | 0 | 1.537219  | -4.014692 | -1.031761 |
| 83 | 6 | 0 | 3.262890  | -3.142151 | -3.018732 |
| 84 | 1 | 0 | 2.768019  | -1.168537 | -2.361243 |
| 85 | 6 | 0 | 2.219001  | -4.935592 | -1.815669 |
| 86 | 1 | 0 | 0.880318  | -4.378573 | -0.253348 |
| 87 | 6 | 0 | 3.079005  | -4.502853 | -2.816881 |
| 88 | 1 | 0 | 3.950540  | -2.789526 | -3.778738 |
| 89 | 1 | 0 | 2.079921  | -5.995743 | -1.636659 |
| 90 | 1 | 0 | 3.613700  | -5.222994 | -3.426007 |

-----  
**Q (NIMAG=0)**  
 -----

| Center<br>Number | Atomic<br>Number | Atomic<br>Type | Coordinates (Angstroms) |           |           |
|------------------|------------------|----------------|-------------------------|-----------|-----------|
|                  |                  |                | X                       | Y         | Z         |
| 1                | 44               | 0              | 1.371226                | 0.959085  | 0.388108  |
| 2                | 53               | 0              | 3.928672                | -0.089232 | 0.967686  |
| 3                | 15               | 0              | -0.835663               | 1.703166  | 0.299138  |
| 4                | 15               | 0              | 0.774246                | -1.293040 | -0.301010 |
| 5                | 8                | 0              | -3.867464               | -2.281490 | 3.477858  |
| 6                | 8                | 0              | -3.313275               | -2.818201 | 1.321846  |
| 7                | 8                | 0              | -4.417426               | -0.930292 | -1.100909 |
| 8                | 8                | 0              | -4.348927               | -1.590506 | -3.304872 |
| 9                | 8                | 0              | 1.010954                | 0.702923  | 3.327520  |
| 10               | 6                | 0              | -1.917165               | 0.586983  | 1.285949  |
| 11               | 6                | 0              | -2.305772               | 0.914456  | 2.578435  |
| 12               | 1                | 0              | -2.095573               | 1.899451  | 2.969030  |
| 13               | 6                | 0              | -2.969372               | 0.011080  | 3.417764  |
| 14               | 1                | 0              | -3.264670               | 0.282305  | 4.422292  |
| 15               | 6                | 0              | -3.219374               | -1.232542 | 2.904438  |
| 16               | 6                | 0              | -3.666606               | -3.369856 | 2.582436  |
| 17               | 1                | 0              | -4.593408               | -3.932752 | 2.483469  |
| 18               | 1                | 0              | -2.840792               | -3.992695 | 2.947849  |
| 19               | 6                | 0              | -2.868842               | -1.561274 | 1.601716  |
| 20               | 6                | 0              | -2.217303               | -0.696590 | 0.754408  |
| 21               | 6                | 0              | -2.016075               | -1.124566 | -0.658921 |
| 22               | 6                | 0              | -3.135867               | -1.221949 | -1.451763 |
| 23               | 6                | 0              | -5.200800               | -1.098225 | -2.274541 |

|    |   |   |           |           |           |
|----|---|---|-----------|-----------|-----------|
| 24 | 1 | 0 | -5.992930 | -1.825174 | -2.080541 |
| 25 | 1 | 0 | -5.610428 | -0.130066 | -2.577898 |
| 26 | 6 | 0 | -3.096540 | -1.623555 | -2.777355 |
| 27 | 6 | 0 | -1.920749 | -1.987310 | -3.376306 |
| 28 | 1 | 0 | -1.885198 | -2.314620 | -4.406897 |
| 29 | 6 | 0 | -0.764628 | -1.907918 | -2.589709 |
| 30 | 1 | 0 | 0.175819  | -2.194509 | -3.039922 |
| 31 | 6 | 0 | -0.786207 | -1.479933 | -1.266589 |
| 32 | 6 | 0 | 1.145867  | 0.762353  | 2.186093  |
| 33 | 6 | 0 | 2.562156  | 2.398592  | -1.908919 |
| 34 | 6 | 0 | 1.861902  | 2.952876  | -0.869443 |
| 35 | 6 | 0 | 2.197665  | 2.936810  | 0.536248  |
| 36 | 1 | 0 | 0.906002  | 3.403882  | -1.133613 |
| 37 | 1 | 0 | 3.247586  | 2.872420  | 0.804894  |
| 38 | 1 | 0 | 1.658913  | 3.663016  | 1.136422  |
| 39 | 6 | 0 | 4.019335  | 2.041055  | -1.852905 |
| 40 | 1 | 0 | 4.451920  | 2.178495  | -0.866395 |
| 41 | 1 | 0 | 4.205892  | 1.003225  | -2.145184 |
| 42 | 1 | 0 | 4.555948  | 2.681229  | -2.563473 |
| 43 | 6 | 0 | 2.008691  | 2.471455  | -3.310409 |
| 44 | 1 | 0 | 2.653189  | 3.112760  | -3.922020 |
| 45 | 1 | 0 | 1.998586  | 1.491755  | -3.803028 |
| 46 | 1 | 0 | 0.999966  | 2.883872  | -3.341281 |
| 47 | 6 | 0 | -1.768365 | 1.795121  | -1.279126 |
| 48 | 6 | 0 | -3.128741 | 2.111975  | -1.277483 |
| 49 | 6 | 0 | -1.140660 | 1.491850  | -2.480341 |
| 50 | 6 | 0 | -3.837061 | 2.148729  | -2.469012 |
| 51 | 1 | 0 | -3.635177 | 2.318704  | -0.340945 |
| 52 | 6 | 0 | -1.852325 | 1.516161  | -3.673193 |
| 53 | 1 | 0 | -0.100114 | 1.195611  | -2.470886 |
| 54 | 6 | 0 | -3.200061 | 1.848934  | -3.669791 |
| 55 | 1 | 0 | -4.890564 | 2.405968  | -2.460134 |
| 56 | 1 | 0 | -1.354613 | 1.259067  | -4.600955 |
| 57 | 1 | 0 | -3.758118 | 1.863926  | -4.599042 |
| 58 | 6 | 0 | -1.065026 | 3.396845  | 0.995038  |
| 59 | 6 | 0 | -0.596785 | 3.680425  | 2.283730  |
| 60 | 6 | 0 | -1.567011 | 4.448799  | 0.228186  |
| 61 | 6 | 0 | -0.681803 | 4.962044  | 2.805775  |
| 62 | 1 | 0 | -0.136061 | 2.905548  | 2.882992  |
| 63 | 6 | 0 | -1.634741 | 5.737772  | 0.746519  |
| 64 | 1 | 0 | -1.903694 | 4.275558  | -0.785589 |
| 65 | 6 | 0 | -1.204574 | 5.996772  | 2.038791  |
| 66 | 1 | 0 | -0.318149 | 5.154164  | 3.808482  |
| 67 | 1 | 0 | -2.024470 | 6.539750  | 0.130109  |
| 68 | 1 | 0 | -1.260254 | 7.001085  | 2.442742  |
| 69 | 6 | 0 | 0.522499  | -2.584346 | 0.989960  |
| 70 | 6 | 0 | -0.312914 | -3.677532 | 0.746378  |
| 71 | 6 | 0 | 1.202841  | -2.512682 | 2.204597  |
| 72 | 6 | 0 | -0.467672 | -4.672999 | 1.701366  |
| 73 | 1 | 0 | -0.852999 | -3.752273 | -0.189586 |
| 74 | 6 | 0 | 1.037974  | -3.504289 | 3.163258  |
| 75 | 1 | 0 | 1.886477  | -1.697264 | 2.397252  |
| 76 | 6 | 0 | 0.202495  | -4.585652 | 2.916102  |

|    |   |   |           |           |           |
|----|---|---|-----------|-----------|-----------|
| 77 | 1 | 0 | -1.114863 | -5.517904 | 1.492290  |
| 78 | 1 | 0 | 1.572787  | -3.429413 | 4.102782  |
| 79 | 1 | 0 | 0.079869  | -5.361748 | 3.663713  |
| 80 | 6 | 0 | 1.999502  | -2.063078 | -1.430378 |
| 81 | 6 | 0 | 2.402486  | -3.391236 | -1.336454 |
| 82 | 6 | 0 | 2.540153  | -1.257897 | -2.431891 |
| 83 | 6 | 0 | 3.328695  | -3.904227 | -2.238445 |
| 84 | 1 | 0 | 2.010170  | -4.026767 | -0.552066 |
| 85 | 6 | 0 | 3.451507  | -1.771652 | -3.340328 |
| 86 | 1 | 0 | 2.251417  | -0.214132 | -2.479710 |
| 87 | 6 | 0 | 3.850217  | -3.100644 | -3.242715 |
| 88 | 1 | 0 | 3.647287  | -4.936480 | -2.148496 |
| 89 | 1 | 0 | 3.866065  | -1.130878 | -4.110631 |
| 90 | 1 | 0 | 4.575267  | -3.503716 | -3.940641 |

-----  
**R (NIMAG=0)**  
 -----

| Center<br>Number | Atomic<br>Number | Atomic<br>Type | Coordinates (Angstroms) |           |           |
|------------------|------------------|----------------|-------------------------|-----------|-----------|
|                  |                  |                | X                       | Y         | Z         |
| 1                | 44               | 0              | 1.201374                | 1.257783  | -0.605995 |
| 2                | 53               | 0              | 1.877976                | 1.895997  | 2.126102  |
| 3                | 15               | 0              | -1.091850               | 1.476420  | -0.054538 |
| 4                | 15               | 0              | 1.283364                | -1.124181 | -0.142191 |
| 5                | 8                | 0              | -2.357309               | -3.421674 | 1.451012  |
| 6                | 8                | 0              | -2.882676               | -2.833195 | 3.611864  |
| 7                | 8                | 0              | -3.729509               | -2.322954 | -1.194184 |
| 8                | 8                | 0              | -3.301053               | -3.495375 | -3.114526 |
| 9                | 8                | 0              | 0.561534                | 0.436640  | -3.403122 |
| 10               | 6                | 0              | -1.716907               | 0.178255  | 1.080358  |
| 11               | 6                | 0              | -1.774293               | -1.177811 | 0.663089  |
| 12               | 6                | 0              | -2.212267               | -2.078840 | 1.607519  |
| 13               | 6                | 0              | -2.528915               | -1.725838 | 2.909172  |
| 14               | 6                | 0              | -2.438981               | -0.428841 | 3.338440  |
| 15               | 1                | 0              | -2.663121               | -0.149988 | 4.359226  |
| 16               | 6                | 0              | -2.031266               | 0.518226  | 2.391958  |
| 17               | 1                | 0              | -1.947201               | 1.549828  | 2.706112  |
| 18               | 6                | 0              | -2.702899               | -3.937574 | 2.729084  |
| 19               | 1                | 0              | -1.885326               | -4.564663 | 3.096563  |
| 20               | 1                | 0              | -3.639114               | -4.495020 | 2.653250  |
| 21               | 6                | 0              | -1.399914               | -1.745640 | -0.665065 |
| 22               | 6                | 0              | -0.064762               | -1.946535 | -1.113020 |
| 23               | 6                | 0              | 0.176361                | -2.706218 | -2.249511 |
| 24               | 1                | 0              | 1.191425                | -2.901088 | -2.560199 |
| 25               | 6                | 0              | -0.851315               | -3.266650 | -3.018563 |
| 26               | 1                | 0              | -0.642132               | -3.861365 | -3.897590 |
| 27               | 6                | 0              | -2.130481               | -3.034018 | -2.594720 |
| 28               | 6                | 0              | -2.386936               | -2.310924 | -1.438847 |
| 29               | 6                | 0              | 0.799808                | 0.763603  | -2.326796 |
| 30               | 6                | 0              | 3.422363                | 1.721514  | -1.453060 |
| 31               | 6                | 0              | 2.731490                | 2.831729  | -0.942164 |
| 32               | 1                | 0              | 3.056280                | 3.212986  | 0.017656  |

|    |   |   |           |           |           |
|----|---|---|-----------|-----------|-----------|
| 33 | 6 | 0 | 1.495848  | 3.313451  | -1.434006 |
| 34 | 1 | 0 | 1.285215  | 3.293608  | -2.498955 |
| 35 | 1 | 0 | 1.048749  | 4.156397  | -0.921190 |
| 36 | 6 | 0 | -4.318512 | -2.819251 | -2.388052 |
| 37 | 1 | 0 | -4.690949 | -1.978016 | -2.985867 |
| 38 | 1 | 0 | -5.111729 | -3.521126 | -2.134340 |
| 39 | 6 | 0 | 3.562548  | 1.534161  | -2.948947 |
| 40 | 1 | 0 | 3.617041  | 0.484506  | -3.235822 |
| 41 | 1 | 0 | 2.767636  | 2.009814  | -3.522901 |
| 42 | 1 | 0 | 4.509775  | 1.994202  | -3.256724 |
| 43 | 6 | 0 | 4.610492  | 1.208489  | -0.673878 |
| 44 | 1 | 0 | 4.799298  | 0.156795  | -0.897415 |
| 45 | 1 | 0 | 5.513436  | 1.765148  | -0.956979 |
| 46 | 1 | 0 | 4.460982  | 1.309503  | 0.401835  |
| 47 | 6 | 0 | 1.074415  | -2.101755 | 1.418657  |
| 48 | 6 | 0 | 1.057963  | -3.496221 | 1.293397  |
| 49 | 6 | 0 | 0.900862  | -1.537790 | 2.676102  |
| 50 | 6 | 0 | 0.899075  | -4.303472 | 2.407683  |
| 51 | 1 | 0 | 1.168691  | -3.954935 | 0.317215  |
| 52 | 6 | 0 | 0.731013  | -2.349545 | 3.793630  |
| 53 | 1 | 0 | 0.885444  | -0.464000 | 2.789042  |
| 54 | 6 | 0 | 0.737970  | -3.729821 | 3.666296  |
| 55 | 1 | 0 | 0.897432  | -5.381755 | 2.292990  |
| 56 | 1 | 0 | 0.588673  | -1.889944 | 4.764763  |
| 57 | 1 | 0 | 0.613482  | -4.359461 | 4.540765  |
| 58 | 6 | 0 | 2.870753  | -1.830157 | -0.751676 |
| 59 | 6 | 0 | 3.818001  | -2.301887 | 0.158776  |
| 60 | 6 | 0 | 3.222589  | -1.761690 | -2.101758 |
| 61 | 6 | 0 | 5.069845  | -2.721297 | -0.275113 |
| 62 | 1 | 0 | 3.585618  | -2.336521 | 1.215784  |
| 63 | 6 | 0 | 4.464710  | -2.201282 | -2.537066 |
| 64 | 1 | 0 | 2.532788  | -1.345519 | -2.824838 |
| 65 | 6 | 0 | 5.393835  | -2.685117 | -1.624185 |
| 66 | 1 | 0 | 5.792873  | -3.076897 | 0.449875  |
| 67 | 1 | 0 | 4.711425  | -2.147480 | -3.591440 |
| 68 | 1 | 0 | 6.368000  | -3.019359 | -1.961970 |
| 69 | 6 | 0 | -2.264628 | 1.426091  | -1.477290 |
| 70 | 6 | 0 | -3.487741 | 0.761153  | -1.424484 |
| 71 | 6 | 0 | -1.964898 | 2.196990  | -2.600545 |
| 72 | 6 | 0 | -4.382306 | 0.848925  | -2.484234 |
| 73 | 1 | 0 | -3.752269 | 0.169468  | -0.557258 |
| 74 | 6 | 0 | -2.857180 | 2.283491  | -3.659118 |
| 75 | 1 | 0 | -1.029101 | 2.742087  | -2.643339 |
| 76 | 6 | 0 | -4.068843 | 1.605216  | -3.605724 |
| 77 | 1 | 0 | -5.335316 | 0.334693  | -2.421970 |
| 78 | 1 | 0 | -2.605351 | 2.883013  | -4.526198 |
| 79 | 1 | 0 | -4.767955 | 1.673179  | -4.431568 |
| 80 | 6 | 0 | -1.711254 | 3.042309  | 0.709172  |
| 81 | 6 | 0 | -3.088894 | 3.233207  | 0.864392  |
| 82 | 6 | 0 | -0.846759 | 4.058440  | 1.100993  |
| 83 | 6 | 0 | -3.583163 | 4.410184  | 1.403091  |
| 84 | 1 | 0 | -3.784144 | 2.458879  | 0.563020  |
| 85 | 6 | 0 | -1.343222 | 5.242765  | 1.636417  |



|    |   |   |           |          |          |
|----|---|---|-----------|----------|----------|
| 86 | 1 | 0 | 0.220479  | 3.915087 | 1.021080 |
| 87 | 6 | 0 | -2.709286 | 5.422053 | 1.788608 |
| 88 | 1 | 0 | -4.653292 | 4.539676 | 1.518301 |
| 89 | 1 | 0 | -0.651587 | 6.019772 | 1.940917 |
| 90 | 1 | 0 | -3.095861 | 6.344621 | 2.207081 |

-----  
**S (NIMAG=0)**  
 -----

| Center<br>Number | Atomic<br>Number | Atomic<br>Type | Coordinates (Angstroms) |           |           |
|------------------|------------------|----------------|-------------------------|-----------|-----------|
|                  |                  |                | X                       | Y         | Z         |
| 1                | 44               | 0              | 0.783664                | -1.589477 | -0.637259 |
| 2                | 53               | 0              | 0.816244                | -1.930896 | 2.232598  |
| 3                | 15               | 0              | 1.623600                | 0.631099  | -0.192907 |
| 4                | 15               | 0              | -1.524518               | -0.991960 | -0.515989 |
| 5                | 8                | 0              | -2.482771               | 2.624531  | 2.403380  |
| 6                | 8                | 0              | -1.397798               | 2.853474  | 4.402415  |
| 7                | 8                | 0              | -1.168625               | 4.261250  | -0.043385 |
| 8                | 8                | 0              | -2.156686               | 4.713368  | -2.071754 |
| 9                | 8                | 0              | 0.739516                | -1.152340 | -3.584674 |
| 10               | 6                | 0              | 0.799630                | 1.416507  | 1.253193  |
| 11               | 6                | 0              | -0.579498               | 1.730984  | 1.126025  |
| 12               | 6                | 0              | -1.194177               | 2.189977  | 2.266828  |
| 13               | 6                | 0              | -0.532676               | 2.352172  | 3.476270  |
| 14               | 6                | 0              | 0.808017                | 2.108362  | 3.595165  |
| 15               | 1                | 0              | 1.334625                | 2.263788  | 4.526939  |
| 16               | 6                | 0              | 1.459971                | 1.628660  | 2.453868  |
| 17               | 1                | 0              | 2.513549                | 1.403157  | 2.531970  |
| 18               | 6                | 0              | -2.680062               | 2.714665  | 3.807398  |
| 19               | 1                | 0              | -3.148971               | 1.789289  | 4.166786  |
| 20               | 1                | 0              | -3.282384               | 3.593311  | 4.031691  |
| 21               | 6                | 0              | -1.314482               | 1.821489  | -0.170719 |
| 22               | 6                | 0              | -1.801202               | 0.766588  | -0.988692 |
| 23               | 6                | 0              | -2.399805               | 1.058278  | -2.211180 |
| 24               | 1                | 0              | -2.751445               | 0.249554  | -2.837026 |
| 25               | 6                | 0              | -2.569448               | 2.366306  | -2.680465 |
| 26               | 1                | 0              | -3.023973               | 2.570160  | -3.640699 |
| 27               | 6                | 0              | -2.128999               | 3.371819  | -1.863417 |
| 28               | 6                | 0              | -1.533005               | 3.097006  | -0.643443 |
| 29               | 6                | 0              | 0.743363                | -1.282649 | -2.437122 |
| 30               | 6                | 0              | 2.782639                | -2.840332 | -0.849021 |
| 31               | 6                | 0              | 1.647078                | -3.467784 | -1.416378 |
| 32               | 1                | 0              | 1.589151                | -3.514699 | -2.502620 |
| 33               | 6                | 0              | 0.487764                | -3.809469 | -0.689901 |
| 34               | 1                | 0              | 0.559846                | -4.112563 | 0.346637  |
| 35               | 1                | 0              | -0.349579               | -4.230247 | -1.234751 |
| 36               | 6                | 0              | -1.543787               | 5.305789  | -0.929422 |
| 37               | 1                | 0              | -0.649662               | 5.851036  | -1.243420 |
| 38               | 1                | 0              | -2.262655               | 5.962513  | -0.432263 |
| 39               | 6                | 0              | 3.393427                | -3.382806 | 0.422017  |
| 40               | 1                | 0              | 3.876085                | -2.601469 | 1.007820  |
| 41               | 1                | 0              | 2.677137                | -3.888632 | 1.063682  |

|    |   |   |           |           |           |
|----|---|---|-----------|-----------|-----------|
| 42 | 1 | 0 | 4.171492  | -4.102689 | 0.134264  |
| 43 | 6 | 0 | 3.830360  | -2.301507 | -1.800800 |
| 44 | 1 | 0 | 4.389200  | -1.487405 | -1.334091 |
| 45 | 1 | 0 | 4.555331  | -3.086425 | -2.052372 |
| 46 | 1 | 0 | 3.398621  | -1.924743 | -2.730536 |
| 47 | 6 | 0 | -2.539289 | -1.227096 | 0.994445  |
| 48 | 6 | 0 | -3.369911 | -0.237443 | 1.508226  |
| 49 | 6 | 0 | -2.558539 | -2.500541 | 1.564758  |
| 50 | 6 | 0 | -4.193987 | -0.511111 | 2.595512  |
| 51 | 1 | 0 | -3.390226 | 0.750002  | 1.066827  |
| 52 | 6 | 0 | -3.386354 | -2.773715 | 2.641404  |
| 53 | 1 | 0 | -1.916395 | -3.278253 | 1.168471  |
| 54 | 6 | 0 | -4.202692 | -1.776435 | 3.164596  |
| 55 | 1 | 0 | -4.842211 | 0.267401  | 2.983322  |
| 56 | 1 | 0 | -3.385255 | -3.764222 | 3.080875  |
| 57 | 1 | 0 | -4.846104 | -1.989436 | 4.010943  |
| 58 | 6 | 0 | -2.632838 | -1.891333 | -1.699612 |
| 59 | 6 | 0 | -4.021656 | -1.765797 | -1.577945 |
| 60 | 6 | 0 | -2.128262 | -2.692889 | -2.719660 |
| 61 | 6 | 0 | -4.873107 | -2.414648 | -2.458319 |
| 62 | 1 | 0 | -4.441985 | -1.157367 | -0.786146 |
| 63 | 6 | 0 | -2.981177 | -3.346664 | -3.603235 |
| 64 | 1 | 0 | -1.062373 | -2.820591 | -2.832918 |
| 65 | 6 | 0 | -4.354780 | -3.208404 | -3.476268 |
| 66 | 1 | 0 | -5.945594 | -2.304007 | -2.345810 |
| 67 | 1 | 0 | -2.564048 | -3.966577 | -4.388512 |
| 68 | 1 | 0 | -5.020876 | -3.719562 | -4.162123 |
| 69 | 6 | 0 | 1.490201  | 2.061746  | -1.364240 |
| 70 | 6 | 0 | 1.865349  | 3.321902  | -0.883660 |
| 71 | 6 | 0 | 1.027115  | 1.959345  | -2.670825 |
| 72 | 6 | 0 | 1.786120  | 4.442488  | -1.694208 |
| 73 | 1 | 0 | 2.214859  | 3.427105  | 0.136923  |
| 74 | 6 | 0 | 0.933866  | 3.086640  | -3.481160 |
| 75 | 1 | 0 | 0.708390  | 1.012392  | -3.072060 |
| 76 | 6 | 0 | 1.313366  | 4.329249  | -2.998338 |
| 77 | 1 | 0 | 2.088139  | 5.408034  | -1.303488 |
| 78 | 1 | 0 | 0.553222  | 2.985438  | -4.490795 |
| 79 | 1 | 0 | 1.238890  | 5.206521  | -3.631176 |
| 80 | 6 | 0 | 3.437091  | 0.648006  | 0.130830  |
| 81 | 6 | 0 | 4.315774  | 1.234197  | -0.783353 |
| 82 | 6 | 0 | 3.970619  | -0.052122 | 1.216109  |
| 83 | 6 | 0 | 5.690742  | 1.137846  | -0.605644 |
| 84 | 1 | 0 | 3.935224  | 1.763460  | -1.647449 |
| 85 | 6 | 0 | 5.344087  | -0.131746 | 1.399474  |
| 86 | 1 | 0 | 3.308049  | -0.562437 | 1.906031  |
| 87 | 6 | 0 | 6.210089  | 0.461835  | 0.489559  |
| 88 | 1 | 0 | 6.354883  | 1.594656  | -1.330527 |
| 89 | 1 | 0 | 5.735240  | -0.676106 | 2.251583  |
| 90 | 1 | 0 | 7.282766  | 0.390543  | 0.629418  |

-----  
T (NIMAG=0)  
-----

| Center<br>Number | Atomic<br>Number | Atomic<br>Type | Coordinates (Angstroms) |           |           |
|------------------|------------------|----------------|-------------------------|-----------|-----------|
|                  |                  |                | X                       | Y         | Z         |
| 1                | 44               | 0              | 1.318308                | -1.031396 | -0.692775 |
| 2                | 53               | 0              | 1.719240                | -2.378481 | 1.835171  |
| 3                | 15               | 0              | 1.256460                | 1.180693  | 0.244422  |
| 4                | 15               | 0              | -1.035067               | -1.432597 | -0.419268 |
| 5                | 8                | 0              | -3.847635               | 1.696538  | 1.399807  |
| 6                | 8                | 0              | -3.530119               | 2.068886  | 3.646533  |
| 7                | 8                | 0              | -2.581245               | 3.549693  | -0.916986 |
| 8                | 8                | 0              | -3.483943               | 3.315419  | -3.007587 |
| 9                | 8                | 0              | 0.575767                | -0.125252 | -3.432572 |
| 10               | 6                | 0              | -0.178443               | 1.495998  | 1.349198  |
| 11               | 6                | 0              | -1.488168               | 1.450840  | 0.798325  |
| 12               | 6                | 0              | -2.517895               | 1.681620  | 1.681049  |
| 13               | 6                | 0              | -2.327632               | 1.910684  | 3.034955  |
| 14               | 6                | 0              | -1.073434               | 1.950399  | 3.580899  |
| 15               | 1                | 0              | -0.917288               | 2.131113  | 4.635972  |
| 16               | 6                | 0              | -0.000035               | 1.745658  | 2.703717  |
| 17               | 1                | 0              | 1.001513                | 1.792891  | 3.108179  |
| 18               | 6                | 0              | -4.516298               | 1.822854  | 2.647073  |
| 19               | 1                | 0              | -5.035492               | 0.886521  | 2.873340  |
| 20               | 1                | 0              | -5.204743               | 2.668963  | 2.604172  |
| 21               | 6                | 0              | -1.884055               | 1.213235  | -0.623003 |
| 22               | 6                | 0              | -1.930306               | -0.056785 | -1.261905 |
| 23               | 6                | 0              | -2.538943               | -0.195146 | -2.500481 |
| 24               | 1                | 0              | -2.598963               | -1.170819 | -2.961247 |
| 25               | 6                | 0              | -3.090526               | 0.890810  | -3.193353 |
| 26               | 1                | 0              | -3.564295               | 0.767660  | -4.157994 |
| 27               | 6                | 0              | -3.000972               | 2.113742  | -2.586984 |
| 28               | 6                | 0              | -2.434688               | 2.258021  | -1.327051 |
| 29               | 6                | 0              | 0.886344                | -0.423894 | -2.364798 |
| 30               | 6                | 0              | 1.872316                | -2.908148 | -1.772241 |
| 31               | 6                | 0              | 3.024763                | -2.359280 | -1.166709 |
| 32               | 1                | 0              | 3.368792                | -2.843010 | -0.261862 |
| 33               | 6                | 0              | 3.566834                | -1.087371 | -1.436431 |
| 34               | 1                | 0              | 1.676158                | -2.770812 | -2.830894 |
| 35               | 1                | 0              | 1.491529                | -3.838849 | -1.365236 |
| 36               | 6                | 0              | -2.960493               | 4.262693  | -2.084757 |
| 37               | 1                | 0              | -2.073344               | 4.741656  | -2.519041 |
| 38               | 1                | 0              | -3.733066               | 4.986870  | -1.830843 |
| 39               | 6                | 0              | 4.633394                | -0.577030 | -0.493502 |
| 40               | 1                | 0              | 5.623386                | -0.920579 | -0.820164 |
| 41               | 1                | 0              | 4.656118                | 0.515885  | -0.479120 |
| 42               | 1                | 0              | 4.465259                | -0.920639 | 0.528058  |
| 43               | 6                | 0              | 3.770848                | -0.611985 | -2.860432 |
| 44               | 1                | 0              | 4.767164                | -0.935748 | -3.185890 |
| 45               | 1                | 0              | 3.049152                | -1.020307 | -3.567051 |
| 46               | 1                | 0              | 3.759331                | 0.477633  | -2.938048 |
| 47               | 6                | 0              | -1.466680               | -2.999230 | -1.284940 |
| 48               | 6                | 0              | -1.895727               | -4.106036 | -0.552540 |
| 49               | 6                | 0              | -1.201613               | -3.162064 | -2.648434 |
| 50               | 6                | 0              | -2.085798               | -5.335091 | -1.174372 |

|    |   |   |           |           |           |
|----|---|---|-----------|-----------|-----------|
| 51 | 1 | 0 | -2.071762 | -4.019510 | 0.512197  |
| 52 | 6 | 0 | -1.412004 | -4.382955 | -3.270828 |
| 53 | 1 | 0 | -0.804261 | -2.340680 | -3.231508 |
| 54 | 6 | 0 | -1.857359 | -5.475444 | -2.535071 |
| 55 | 1 | 0 | -2.411542 | -6.184668 | -0.585292 |
| 56 | 1 | 0 | -1.210364 | -4.484341 | -4.331149 |
| 57 | 1 | 0 | -2.010850 | -6.433075 | -3.019282 |
| 58 | 6 | 0 | -2.120821 | -1.544303 | 1.078240  |
| 59 | 6 | 0 | -1.673938 | -1.415723 | 2.387590  |
| 60 | 6 | 0 | -3.490949 | -1.707116 | 0.843989  |
| 61 | 6 | 0 | -2.573509 | -1.474160 | 3.446600  |
| 62 | 1 | 0 | -0.624950 | -1.258690 | 2.587697  |
| 63 | 6 | 0 | -4.385846 | -1.775009 | 1.899872  |
| 64 | 1 | 0 | -3.862385 | -1.780113 | -0.172209 |
| 65 | 6 | 0 | -3.926555 | -1.663704 | 3.209119  |
| 66 | 1 | 0 | -2.205863 | -1.365046 | 4.460227  |
| 67 | 1 | 0 | -5.442653 | -1.911829 | 1.699520  |
| 68 | 1 | 0 | -4.623725 | -1.718455 | 4.038334  |
| 69 | 6 | 0 | 1.092146  | 2.600585  | -0.923063 |
| 70 | 6 | 0 | 0.470415  | 3.785599  | -0.525441 |
| 71 | 6 | 0 | 1.708477  | 2.556071  | -2.171068 |
| 72 | 6 | 0 | 0.454059  | 4.889465  | -1.366794 |
| 73 | 1 | 0 | -0.005727 | 3.851223  | 0.444708  |
| 74 | 6 | 0 | 1.686985  | 3.656474  | -3.017732 |
| 75 | 1 | 0 | 2.222630  | 1.659147  | -2.483522 |
| 76 | 6 | 0 | 1.056803  | 4.827609  | -2.617736 |
| 77 | 1 | 0 | -0.030892 | 5.802285  | -1.038733 |
| 78 | 1 | 0 | 2.166189  | 3.596360  | -3.987985 |
| 79 | 1 | 0 | 1.041818  | 5.690389  | -3.274404 |
| 80 | 6 | 0 | 2.737153  | 1.736616  | 1.198014  |
| 81 | 6 | 0 | 3.191376  | 0.977771  | 2.279530  |
| 82 | 6 | 0 | 3.476602  | 2.857367  | 0.812760  |
| 83 | 6 | 0 | 4.345688  | 1.333954  | 2.961651  |
| 84 | 1 | 0 | 2.655288  | 0.085752  | 2.577277  |
| 85 | 6 | 0 | 4.639485  | 3.204767  | 1.490633  |
| 86 | 1 | 0 | 3.159286  | 3.467039  | -0.022663 |
| 87 | 6 | 0 | 5.077965  | 2.446551  | 2.566856  |
| 88 | 1 | 0 | 4.677902  | 0.726215  | 3.795554  |
| 89 | 1 | 0 | 5.201871  | 4.074785  | 1.170884  |
| 90 | 1 | 0 | 5.986228  | 2.718512  | 3.092781  |

-----  
**U (NIMAG=0)**

| Center<br>Number | Atomic<br>Number | Atomic<br>Type | Coordinates (Angstroms) |           |           |
|------------------|------------------|----------------|-------------------------|-----------|-----------|
|                  |                  |                | X                       | Y         | Z         |
| 1                | 44               | 0              | 0.958229                | 1.486670  | -0.595189 |
| 2                | 53               | 0              | 1.009263                | 1.684666  | 2.295658  |
| 3                | 15               | 0              | -1.410537               | 1.205003  | -0.346037 |
| 4                | 15               | 0              | 1.483842                | -0.867585 | -0.442243 |
| 5                | 8                | 0              | -1.308043               | -3.135448 | 2.561790  |
| 6                | 8                | 0              | -2.144400               | -2.161583 | 4.452152  |

|    |   |   |           |           |           |
|----|---|---|-----------|-----------|-----------|
| 7  | 8 | 0 | -3.362028 | -2.931648 | 0.021475  |
| 8  | 8 | 0 | -3.178021 | -4.313875 | -1.805702 |
| 9  | 8 | 0 | 0.646271  | 1.538729  | -3.556294 |
| 10 | 6 | 0 | -1.866024 | 0.202410  | 1.119486  |
| 11 | 6 | 0 | -1.447929 | -1.153586 | 1.113515  |
| 12 | 6 | 0 | -1.579589 | -1.821421 | 2.306351  |
| 13 | 6 | 0 | -2.113076 | -1.239126 | 3.449583  |
| 14 | 6 | 0 | -2.597447 | 0.040029  | 3.441255  |
| 15 | 1 | 0 | -3.046574 | 0.484289  | 4.319056  |
| 16 | 6 | 0 | -2.447571 | 0.757137  | 2.248326  |
| 17 | 1 | 0 | -2.770149 | 1.788858  | 2.230904  |
| 18 | 6 | 0 | -1.337548 | -3.231006 | 3.978540  |
| 19 | 1 | 0 | -0.317274 | -3.119065 | 4.368775  |
| 20 | 1 | 0 | -1.785851 | -4.179884 | 4.267595  |
| 21 | 6 | 0 | -1.121600 | -1.952015 | -0.106425 |
| 22 | 6 | 0 | 0.083697  | -1.996957 | -0.857787 |
| 23 | 6 | 0 | 0.189092  | -2.870054 | -1.936934 |
| 24 | 1 | 0 | 1.116633  | -2.924073 | -2.488181 |
| 25 | 6 | 0 | -0.858227 | -3.700941 | -2.352521 |
| 26 | 1 | 0 | -0.752945 | -4.365558 | -3.199589 |
| 27 | 6 | 0 | -2.018527 | -3.629301 | -1.631065 |
| 28 | 6 | 0 | -2.127974 | -2.790254 | -0.533972 |
| 29 | 6 | 0 | 0.762282  | 1.456060  | -2.409620 |
| 30 | 6 | 0 | 1.007038  | 3.717593  | -0.547677 |
| 31 | 6 | 0 | 2.137970  | 3.243069  | -1.246748 |
| 32 | 1 | 0 | 2.132005  | 3.354846  | -2.329020 |
| 33 | 6 | 0 | 3.139374  | 2.411008  | -0.693832 |
| 34 | 1 | 0 | 1.065702  | 3.963005  | 0.504843  |
| 35 | 1 | 0 | 0.259212  | 4.266269  | -1.110200 |
| 36 | 6 | 0 | -4.092184 | -3.782479 | -0.849009 |
| 37 | 1 | 0 | -4.857653 | -3.197380 | -1.369104 |
| 38 | 1 | 0 | -4.528866 | -4.600595 | -0.274088 |
| 39 | 6 | 0 | 4.110127  | 1.770833  | -1.664008 |
| 40 | 1 | 0 | 4.968932  | 2.432624  | -1.834551 |
| 41 | 1 | 0 | 4.499824  | 0.830048  | -1.266666 |
| 42 | 1 | 0 | 3.649277  | 1.550312  | -2.628432 |
| 43 | 6 | 0 | 3.799925  | 2.782383  | 0.615132  |
| 44 | 1 | 0 | 4.687360  | 3.383703  | 0.376683  |
| 45 | 1 | 0 | 3.157307  | 3.362632  | 1.271034  |
| 46 | 1 | 0 | 4.142371  | 1.911939  | 1.177004  |
| 47 | 6 | 0 | -2.471548 | 0.344616  | -1.595562 |
| 48 | 6 | 0 | -3.824794 | 0.170956  | -1.285324 |
| 49 | 6 | 0 | -1.984828 | -0.198553 | -2.779208 |
| 50 | 6 | 0 | -4.668199 | -0.509017 | -2.149558 |
| 51 | 1 | 0 | -4.217743 | 0.563073  | -0.354000 |
| 52 | 6 | 0 | -2.826443 | -0.892464 | -3.641392 |
| 53 | 1 | 0 | -0.938474 | -0.125237 | -3.027896 |
| 54 | 6 | 0 | -4.169541 | -1.046330 | -3.332592 |
| 55 | 1 | 0 | -5.715811 | -0.626027 | -1.894694 |
| 56 | 1 | 0 | -2.421561 | -1.322721 | -4.549813 |
| 57 | 1 | 0 | -4.824883 | -1.588375 | -4.005201 |
| 58 | 6 | 0 | -2.257197 | 2.833083  | -0.198041 |
| 59 | 6 | 0 | -3.108043 | 3.298166  | -1.201613 |

|    |   |   |           |           |           |
|----|---|---|-----------|-----------|-----------|
| 60 | 6 | 0 | -1.930709 | 3.690715  | 0.857702  |
| 61 | 6 | 0 | -3.641819 | 4.580833  | -1.137092 |
| 62 | 1 | 0 | -3.357309 | 2.667713  | -2.045729 |
| 63 | 6 | 0 | -2.478501 | 4.962869  | 0.926602  |
| 64 | 1 | 0 | -1.222952 | 3.370112  | 1.614566  |
| 65 | 6 | 0 | -3.337723 | 5.412898  | -0.069700 |
| 66 | 1 | 0 | -4.298023 | 4.925403  | -1.928305 |
| 67 | 1 | 0 | -2.218722 | 5.609184  | 1.757241  |
| 68 | 1 | 0 | -3.758304 | 6.410844  | -0.018267 |
| 69 | 6 | 0 | 2.128220  | -1.593750 | 1.113744  |
| 70 | 6 | 0 | 1.669026  | -2.808785 | 1.612816  |
| 71 | 6 | 0 | 3.177075  | -0.943766 | 1.764548  |
| 72 | 6 | 0 | 2.236836  | -3.353271 | 2.760076  |
| 73 | 1 | 0 | 0.864688  | -3.338244 | 1.120158  |
| 74 | 6 | 0 | 3.754288  | -1.494729 | 2.897269  |
| 75 | 1 | 0 | 3.539123  | 0.000267  | 1.379279  |
| 76 | 6 | 0 | 3.278595  | -2.699661 | 3.403323  |
| 77 | 1 | 0 | 1.867274  | -4.299526 | 3.139936  |
| 78 | 1 | 0 | 4.563625  | -0.973621 | 3.394942  |
| 79 | 1 | 0 | 3.721559  | -3.126602 | 4.296234  |
| 80 | 6 | 0 | 2.800532  | -1.402190 | -1.630145 |
| 81 | 6 | 0 | 3.926408  | -2.115483 | -1.219017 |
| 82 | 6 | 0 | 2.692073  | -1.060615 | -2.981024 |
| 83 | 6 | 0 | 4.925393  | -2.451085 | -2.127461 |
| 84 | 1 | 0 | 4.037523  | -2.412544 | -0.184763 |
| 85 | 6 | 0 | 3.679692  | -1.407557 | -3.889779 |
| 86 | 1 | 0 | 1.824871  | -0.525679 | -3.341295 |
| 87 | 6 | 0 | 4.809113  | -2.096538 | -3.462941 |
| 88 | 1 | 0 | 5.796354  | -2.996447 | -1.782114 |
| 89 | 1 | 0 | 3.568894  | -1.129811 | -4.931742 |
| 90 | 1 | 0 | 5.589467  | -2.357546 | -4.168671 |

-----  
**A (NIMAG=0)**  
 -----

| Center<br>Number | Atomic<br>Number | Atomic<br>Type | Coordinates (Angstroms) |           |           |
|------------------|------------------|----------------|-------------------------|-----------|-----------|
|                  |                  |                | X                       | Y         | Z         |
| 1                | 44               | 0              | 1.159622                | 1.539966  | 0.211808  |
| 2                | 53               | 0              | 3.847247                | 1.811149  | 0.199959  |
| 3                | 15               | 0              | -1.104708               | 1.659185  | -0.162464 |
| 4                | 15               | 0              | 1.233082                | -0.915948 | -0.116209 |
| 5                | 8                | 0              | -3.276100               | -2.164853 | 3.794955  |
| 6                | 8                | 0              | -2.449275               | -3.046653 | 1.851057  |
| 7                | 8                | 0              | -3.823473               | -2.202067 | -0.968585 |
| 8                | 8                | 0              | -3.441967               | -3.286252 | -2.945801 |
| 9                | 8                | 0              | 0.664789                | 1.744898  | 3.106324  |
| 10               | 6                | 0              | -1.552937               | 1.270279  | -1.894202 |
| 11               | 6                | 0              | -0.614225               | 1.582656  | -2.877207 |
| 12               | 1                | 0              | 0.324983                | 2.056658  | -2.601010 |
| 13               | 6                | 0              | -0.873436               | 1.301820  | -4.212160 |
| 14               | 1                | 0              | -0.136140               | 1.546933  | -4.967684 |
| 15               | 6                | 0              | -2.073056               | 0.701745  | -4.573066 |

|    |   |   |           |           |           |
|----|---|---|-----------|-----------|-----------|
| 16 | 1 | 0 | -2.272748 | 0.470502  | -5.613056 |
| 17 | 6 | 0 | -3.015224 | 0.392536  | -3.599172 |
| 18 | 1 | 0 | -3.947043 | -0.086639 | -3.877073 |
| 19 | 6 | 0 | -2.759092 | 0.679135  | -2.265543 |
| 20 | 1 | 0 | -3.485997 | 0.402614  | -1.509117 |
| 21 | 6 | 0 | -1.978575 | 3.248523  | 0.139768  |
| 22 | 6 | 0 | -3.309763 | 3.406014  | -0.256569 |
| 23 | 1 | 0 | -3.824703 | 2.605147  | -0.773383 |
| 24 | 6 | 0 | -3.986103 | 4.587173  | 0.005511  |
| 25 | 1 | 0 | -5.017104 | 4.698080  | -0.310340 |
| 26 | 6 | 0 | -3.342354 | 5.626392  | 0.669951  |
| 27 | 1 | 0 | -3.871515 | 6.550348  | 0.874179  |
| 28 | 6 | 0 | -2.021382 | 5.477838  | 1.066152  |
| 29 | 1 | 0 | -1.511435 | 6.283902  | 1.580769  |
| 30 | 6 | 0 | -1.339846 | 4.294533  | 0.800764  |
| 31 | 1 | 0 | -0.305282 | 4.186069  | 1.100409  |
| 32 | 6 | 0 | -2.003645 | 0.491503  | 0.935952  |
| 33 | 6 | 0 | -2.540158 | 1.009924  | 2.111312  |
| 34 | 1 | 0 | -2.590141 | 2.082720  | 2.244849  |
| 35 | 6 | 0 | -2.999483 | 0.198192  | 3.154320  |
| 36 | 1 | 0 | -3.410096 | 0.618864  | 4.062122  |
| 37 | 6 | 0 | -2.888455 | -1.153914 | 2.971442  |
| 38 | 6 | 0 | -2.722086 | -3.339569 | 3.214832  |
| 39 | 1 | 0 | -3.447386 | -4.149419 | 3.272915  |
| 40 | 1 | 0 | -1.783040 | -3.587917 | 3.725227  |
| 41 | 6 | 0 | -2.374347 | -1.685568 | 1.796699  |
| 42 | 6 | 0 | -1.909334 | -0.913991 | 0.757596  |
| 43 | 6 | 0 | -1.490466 | -1.603533 | -0.492547 |
| 44 | 6 | 0 | -2.480549 | -2.219799 | -1.221952 |
| 45 | 6 | 0 | -4.370234 | -3.145442 | -1.877422 |
| 46 | 1 | 0 | -4.490824 | -4.111416 | -1.370130 |
| 47 | 1 | 0 | -5.316606 | -2.772039 | -2.264215 |
| 48 | 6 | 0 | -2.253890 | -2.868386 | -2.424549 |
| 49 | 6 | 0 | -0.994993 | -2.958385 | -2.954566 |
| 50 | 1 | 0 | -0.806809 | -3.452211 | -3.898403 |
| 51 | 6 | 0 | 0.039280  | -2.376350 | -2.213016 |
| 52 | 1 | 0 | 1.045278  | -2.462273 | -2.599117 |
| 53 | 6 | 0 | -0.175817 | -1.707358 | -1.010293 |
| 54 | 6 | 0 | 1.333019  | -1.884763 | 1.437258  |
| 55 | 6 | 0 | 2.104109  | -1.376470 | 2.483804  |
| 56 | 1 | 0 | 2.607511  | -0.422894 | 2.370278  |
| 57 | 6 | 0 | 2.244882  | -2.096121 | 3.662465  |
| 58 | 1 | 0 | 2.843731  | -1.689378 | 4.468773  |
| 59 | 6 | 0 | 1.619858  | -3.329112 | 3.806487  |
| 60 | 1 | 0 | 1.729964  | -3.889587 | 4.728172  |
| 61 | 6 | 0 | 0.859831  | -3.844342 | 2.763296  |
| 62 | 1 | 0 | 0.382178  | -4.813174 | 2.862306  |
| 63 | 6 | 0 | 0.717206  | -3.127625 | 1.581631  |
| 64 | 1 | 0 | 0.118272  | -3.536826 | 0.777221  |
| 65 | 6 | 0 | 2.669831  | -1.523979 | -1.079539 |
| 66 | 6 | 0 | 3.410674  | -2.641364 | -0.705316 |
| 67 | 1 | 0 | 3.161671  | -3.183065 | 0.199271  |
| 68 | 6 | 0 | 4.482368  | -3.062957 | -1.484562 |

|    |   |   |          |           |           |
|----|---|---|----------|-----------|-----------|
| 69 | 1 | 0 | 5.059616 | -3.927971 | -1.178576 |
| 70 | 6 | 0 | 4.815120 | -2.378239 | -2.644920 |
| 71 | 1 | 0 | 5.653616 | -2.706441 | -3.248647 |
| 72 | 6 | 0 | 4.079455 | -1.260794 | -3.024123 |
| 73 | 1 | 0 | 4.344421 | -0.710369 | -3.919233 |
| 74 | 6 | 0 | 3.020653 | -0.831458 | -2.239681 |
| 75 | 1 | 0 | 2.467262 | 0.056019  | -2.528640 |
| 76 | 6 | 0 | 0.840259 | 1.653809  | 1.972290  |
| 77 | 1 | 0 | 1.230931 | 3.129905  | 0.264490  |

-----

isoprene (NIMAG=0)

| Center Number | Atomic Number | Atomic Type | Coordinates (Angstroms) |           |           |
|---------------|---------------|-------------|-------------------------|-----------|-----------|
|               |               |             | X                       | Y         | Z         |
| 1             | 6             | 0           | 1.973737                | 0.006331  | -0.000146 |
| 2             | 1             | 0           | 2.931402                | -0.500892 | -0.000100 |
| 3             | 1             | 0           | 1.996146                | 1.090942  | -0.000496 |
| 4             | 6             | 0           | 0.832969                | -0.680768 | 0.000176  |
| 5             | 6             | 0           | -0.517701               | -0.100267 | 0.000025  |
| 6             | 6             | 0           | -0.653194               | 1.397559  | 0.000102  |
| 7             | 1             | 0           | -0.171647               | 1.832321  | -0.881288 |
| 8             | 1             | 0           | -1.702127               | 1.696573  | 0.000506  |
| 9             | 1             | 0           | -0.170795               | 1.832284  | 0.881038  |
| 10            | 6             | 0           | -1.583791               | -0.904390 | -0.000143 |
| 11            | 1             | 0           | -2.594145               | -0.510153 | -0.000263 |
| 12            | 1             | 0           | -1.475142               | -1.984101 | -0.000079 |
| 13            | 1             | 0           | 0.874190                | -1.767763 | 0.000595  |

-----

ethanal (NIMAG=0)

| Center Number | Atomic Number | Atomic Type | Coordinates (Angstroms) |           |           |
|---------------|---------------|-------------|-------------------------|-----------|-----------|
|               |               |             | X                       | Y         | Z         |
| 1             | 8             | 0           | -1.228601               | -0.276650 | -0.000000 |
| 2             | 6             | 0           | -0.235444               | 0.396846  | 0.000002  |
| 3             | 1             | 0           | -0.307676               | 1.506806  | -0.000012 |
| 4             | 6             | 0           | 1.165697                | -0.147251 | 0.000000  |
| 5             | 1             | 0           | 1.702009                | 0.222746  | -0.879528 |
| 6             | 1             | 0           | 1.702027                | 0.222840  | 0.879483  |
| 7             | 1             | 0           | 1.150930                | -1.236758 | 0.000048  |

-----

C (NIMAG=0)

| Center Number | Atomic Number | Atomic Type | Coordinates (Angstroms) |           |           |
|---------------|---------------|-------------|-------------------------|-----------|-----------|
|               |               |             | X                       | Y         | Z         |
| 1             | 44            | 0           | -1.193036               | 0.331983  | -1.029991 |
| 2             | 53            | 0           | -3.172102               | -1.480731 | -1.735901 |
| 3             | 15            | 0           | 0.452225                | 1.824502  | -0.342163 |



|    |    |   |           |           |           |
|----|----|---|-----------|-----------|-----------|
| 4  | 15 | 0 | -0.006172 | -1.562922 | 0.110350  |
| 5  | 8  | 0 | 5.445851  | -0.678741 | -2.351478 |
| 6  | 8  | 0 | 4.617469  | -1.449914 | -0.361287 |
| 7  | 8  | 0 | 4.356802  | 0.598254  | 2.132050  |
| 8  | 8  | 0 | 4.046681  | -0.183687 | 4.260183  |
| 9  | 8  | 0 | 0.044286  | 0.266452  | -3.700551 |
| 10 | 6  | 0 | 0.484000  | 2.039115  | 1.474405  |
| 11 | 6  | 0 | -0.668017 | 1.713883  | 2.189149  |
| 12 | 1  | 0 | -1.561908 | 1.379679  | 1.669995  |
| 13 | 6  | 0 | -0.695599 | 1.813876  | 3.573802  |
| 14 | 1  | 0 | -1.599470 | 1.534845  | 4.102674  |
| 15 | 6  | 0 | 0.435969  | 2.246518  | 4.253236  |
| 16 | 1  | 0 | 0.425354  | 2.315685  | 5.335047  |
| 17 | 6  | 0 | 1.588567  | 2.578776  | 3.548571  |
| 18 | 1  | 0 | 2.475977  | 2.902906  | 4.080254  |
| 19 | 6  | 0 | 1.614843  | 2.475085  | 2.164872  |
| 20 | 1  | 0 | 2.529518  | 2.695640  | 1.624028  |
| 21 | 6  | 0 | 0.458201  | 3.543046  | -1.001070 |
| 22 | 6  | 0 | 0.749751  | 4.646341  | -0.200099 |
| 23 | 1  | 0 | 0.969695  | 4.515928  | 0.851555  |
| 24 | 6  | 0 | 0.729182  | 5.929423  | -0.731947 |
| 25 | 1  | 0 | 0.949015  | 6.776528  | -0.092403 |
| 26 | 6  | 0 | 0.420357  | 6.127787  | -2.070801 |
| 27 | 1  | 0 | 0.398453  | 7.130303  | -2.482525 |
| 28 | 6  | 0 | 0.132998  | 5.035050  | -2.879351 |
| 29 | 1  | 0 | -0.114834 | 5.177587  | -3.924675 |
| 30 | 6  | 0 | 0.147391  | 3.753325  | -2.347440 |
| 31 | 1  | 0 | -0.093153 | 2.913199  | -2.987859 |
| 32 | 6  | 0 | 2.116434  | 1.208874  | -0.850646 |
| 33 | 6  | 0 | 2.666779  | 1.694674  | -2.033995 |
| 34 | 1  | 0 | 2.214470  | 2.541817  | -2.527834 |
| 35 | 6  | 0 | 3.792863  | 1.127012  | -2.638536 |
| 36 | 1  | 0 | 4.199097  | 1.521092  | -3.560162 |
| 37 | 6  | 0 | 4.346128  | 0.044305  | -2.009887 |
| 38 | 6  | 0 | 5.430961  | -1.798567 | -1.473113 |
| 39 | 1  | 0 | 6.443775  | -2.003520 | -1.130317 |
| 40 | 1  | 0 | 4.986284  | -2.658632 | -1.989321 |
| 41 | 6  | 0 | 3.832413  | -0.429807 | -0.812528 |
| 42 | 6  | 0 | 2.724680  | 0.107331  | -0.197353 |
| 43 | 6  | 0 | 2.362334  | -0.431427 | 1.138056  |
| 44 | 6  | 0 | 3.241517  | -0.189508 | 2.166963  |
| 45 | 6  | 0 | 5.017565  | 0.338620  | 3.361233  |
| 46 | 1  | 0 | 5.804351  | -0.409790 | 3.200443  |
| 47 | 1  | 0 | 5.420578  | 1.267570  | 3.760831  |
| 48 | 6  | 0 | 3.053061  | -0.656188 | 3.456319  |
| 49 | 6  | 0 | 1.970056  | -1.429702 | 3.775984  |
| 50 | 1  | 0 | 1.811784  | -1.805410 | 4.777930  |
| 51 | 6  | 0 | 1.070580  | -1.708662 | 2.740934  |
| 52 | 1  | 0 | 0.228767  | -2.342696 | 2.973837  |
| 53 | 6  | 0 | 1.229133  | -1.219479 | 1.446512  |
| 54 | 6  | 0 | 0.968268  | -2.651287 | -1.008111 |
| 55 | 6  | 0 | 0.568042  | -2.818899 | -2.333479 |
| 56 | 1  | 0 | -0.308424 | -2.304034 | -2.704723 |

|    |   |   |           |           |           |
|----|---|---|-----------|-----------|-----------|
| 57 | 6 | 0 | 1.268311  | -3.672540 | -3.176499 |
| 58 | 1 | 0 | 0.945852  | -3.788885 | -4.204465 |
| 59 | 6 | 0 | 2.369710  | -4.373553 | -2.702909 |
| 60 | 1 | 0 | 2.914418  | -5.041056 | -3.361514 |
| 61 | 6 | 0 | 2.763726  | -4.224390 | -1.377956 |
| 62 | 1 | 0 | 3.613187  | -4.779167 | -0.994476 |
| 63 | 6 | 0 | 2.068278  | -3.368954 | -0.534444 |
| 64 | 1 | 0 | 2.390722  | -3.256013 | 0.493324  |
| 65 | 6 | 0 | -1.128853 | -2.747601 | 0.947684  |
| 66 | 6 | 0 | -1.257907 | -4.074257 | 0.550205  |
| 67 | 1 | 0 | -0.666673 | -4.458994 | -0.271353 |
| 68 | 6 | 0 | -2.163440 | -4.910637 | 1.193830  |
| 69 | 1 | 0 | -2.264892 | -5.939091 | 0.866837  |
| 70 | 6 | 0 | -2.935859 | -4.434730 | 2.243695  |
| 71 | 1 | 0 | -3.638322 | -5.091145 | 2.744644  |
| 72 | 6 | 0 | -2.806913 | -3.110698 | 2.649671  |
| 73 | 1 | 0 | -3.400476 | -2.722546 | 3.469747  |
| 74 | 6 | 0 | -1.917424 | -2.271915 | 1.995717  |
| 75 | 1 | 0 | -1.820164 | -1.242972 | 2.325045  |
| 76 | 6 | 0 | -0.418352 | 0.270927  | -2.644621 |
| 77 | 6 | 0 | -2.524370 | 1.840282  | -1.749813 |
| 78 | 1 | 0 | -3.039191 | 1.475517  | -2.639180 |
| 79 | 1 | 0 | -2.046228 | 2.789028  | -1.981144 |
| 80 | 6 | 0 | -3.472573 | 1.951055  | -0.619200 |
| 81 | 6 | 0 | -3.533486 | 2.897713  | 0.338046  |
| 82 | 6 | 0 | -4.598079 | 2.865664  | 1.399240  |
| 83 | 1 | 0 | -5.306401 | 2.049465  | 1.244869  |
| 84 | 1 | 0 | -4.159284 | 2.757161  | 2.398056  |
| 85 | 1 | 0 | -5.165048 | 3.803155  | 1.400863  |
| 86 | 6 | 0 | -2.617333 | 4.083625  | 0.421381  |
| 87 | 1 | 0 | -1.941286 | 3.998034  | 1.280711  |
| 88 | 1 | 0 | -2.010989 | 4.213694  | -0.472162 |
| 89 | 1 | 0 | -3.200711 | 4.998300  | 0.571103  |
| 90 | 1 | 0 | -4.232703 | 1.173256  | -0.585081 |
| 91 | 8 | 0 | -3.820661 | 0.092234  | 3.311500  |
| 92 | 6 | 0 | -4.206564 | -0.207182 | 2.207095  |
| 93 | 1 | 0 | -3.602498 | 0.040110  | 1.313697  |
| 94 | 6 | 0 | -5.478088 | -0.934208 | 1.905779  |
| 95 | 1 | 0 | -6.079451 | -0.341727 | 1.209333  |
| 96 | 1 | 0 | -5.224603 | -1.861626 | 1.382080  |
| 97 | 1 | 0 | -6.039249 | -1.140893 | 2.817030  |

-----

**TS1A** (NIMAG=1, 65.6i cm<sup>-1</sup>)

-----

| Center<br>Number | Atomic<br>Number | Atomic<br>Type | Coordinates (Angstroms) |           |           |
|------------------|------------------|----------------|-------------------------|-----------|-----------|
|                  |                  |                | X                       | Y         | Z         |
| 1                | 44               | 0              | -1.303778               | 0.404226  | -0.814866 |
| 2                | 53               | 0              | -3.445053               | -1.246085 | -1.440593 |
| 3                | 15               | 0              | 0.538873                | 1.787584  | -0.371921 |
| 4                | 15               | 0              | -0.161037               | -1.610054 | 0.159313  |
| 5                | 8                | 0              | 5.282960                | -1.089836 | -2.512911 |

|    |   |   |           |           |           |
|----|---|---|-----------|-----------|-----------|
| 6  | 8 | 0 | 4.478669  | -1.735507 | -0.465964 |
| 7  | 8 | 0 | 4.367677  | 0.419807  | 1.928792  |
| 8  | 8 | 0 | 4.066107  | -0.210007 | 4.113068  |
| 9  | 8 | 0 | -0.362665 | 0.236943  | -3.595150 |
| 10 | 6 | 0 | 0.948707  | 2.141767  | 1.374838  |
| 11 | 6 | 0 | 0.017685  | 1.835982  | 2.362040  |
| 12 | 1 | 0 | -0.944841 | 1.411547  | 2.098306  |
| 13 | 6 | 0 | 0.325217  | 2.054673  | 3.700041  |
| 14 | 1 | 0 | -0.401609 | 1.797477  | 4.461612  |
| 15 | 6 | 0 | 1.556997  | 2.587542  | 4.054390  |
| 16 | 1 | 0 | 1.799469  | 2.749337  | 5.098585  |
| 17 | 6 | 0 | 2.487311  | 2.902622  | 3.068834  |
| 18 | 1 | 0 | 3.452921  | 3.313346  | 3.341737  |
| 19 | 6 | 0 | 2.188760  | 2.674162  | 1.734569  |
| 20 | 1 | 0 | 2.932450  | 2.879501  | 0.972223  |
| 21 | 6 | 0 | 0.559224  | 3.455872  | -1.165623 |
| 22 | 6 | 0 | 0.860840  | 4.618232  | -0.456234 |
| 23 | 1 | 0 | 1.094011  | 4.570345  | 0.598991  |
| 24 | 6 | 0 | 0.839060  | 5.858754  | -1.083360 |
| 25 | 1 | 0 | 1.070697  | 6.749127  | -0.510112 |
| 26 | 6 | 0 | 0.516315  | 5.958857  | -2.428461 |
| 27 | 1 | 0 | 0.497832  | 6.927081  | -2.915575 |
| 28 | 6 | 0 | 0.200302  | 4.810159  | -3.143578 |
| 29 | 1 | 0 | -0.072828 | 4.874238  | -4.190345 |
| 30 | 6 | 0 | 0.210966  | 3.573682  | -2.515726 |
| 31 | 1 | 0 | -0.070350 | 2.698007  | -3.087039 |
| 32 | 6 | 0 | 2.080332  | 1.002651  | -1.017016 |
| 33 | 6 | 0 | 2.602480  | 1.398724  | -2.243749 |
| 34 | 1 | 0 | 2.174818  | 2.245043  | -2.760388 |
| 35 | 6 | 0 | 3.680666  | 0.749183  | -2.854155 |
| 36 | 1 | 0 | 4.072406  | 1.075639  | -3.807985 |
| 37 | 6 | 0 | 4.215861  | -0.314872 | -2.180262 |
| 38 | 6 | 0 | 5.281608  | -2.149021 | -1.563080 |
| 39 | 1 | 0 | 6.299370  | -2.327843 | -1.218344 |
| 40 | 1 | 0 | 4.838910  | -3.042369 | -2.019424 |
| 41 | 6 | 0 | 3.720811  | -0.708314 | -0.946429 |
| 42 | 6 | 0 | 2.654321  | -0.096828 | -0.327439 |
| 43 | 6 | 0 | 2.301303  | -0.558107 | 1.043589  |
| 44 | 6 | 0 | 3.213191  | -0.296340 | 2.039540  |
| 45 | 6 | 0 | 5.025552  | 0.266401  | 3.177423  |
| 46 | 1 | 0 | 5.832511  | -0.469980 | 3.075049  |
| 47 | 1 | 0 | 5.404612  | 1.232890  | 3.508668  |
| 48 | 6 | 0 | 3.036023  | -0.681217 | 3.357802  |
| 49 | 6 | 0 | 1.941736  | -1.407782 | 3.741246  |
| 50 | 1 | 0 | 1.799477  | -1.727740 | 4.764771  |
| 51 | 6 | 0 | 1.012112  | -1.716062 | 2.741638  |
| 52 | 1 | 0 | 0.160499  | -2.316074 | 3.023741  |
| 53 | 6 | 0 | 1.152779  | -1.297939 | 1.421832  |
| 54 | 6 | 0 | 0.741775  | -2.653794 | -1.059472 |
| 55 | 6 | 0 | 0.266264  | -2.767935 | -2.364565 |
| 56 | 1 | 0 | -0.614188 | -2.219879 | -2.672009 |
| 57 | 6 | 0 | 0.889710  | -3.618968 | -3.269062 |
| 58 | 1 | 0 | 0.510046  | -3.691174 | -4.281435 |

|    |   |   |           |           |           |
|----|---|---|-----------|-----------|-----------|
| 59 | 6 | 0 | 1.982918  | -4.378150 | -2.873885 |
| 60 | 1 | 0 | 2.465180  | -5.046530 | -3.578589 |
| 61 | 6 | 0 | 2.445821  | -4.289126 | -1.565614 |
| 62 | 1 | 0 | 3.283496  | -4.896467 | -1.239926 |
| 63 | 6 | 0 | 1.831460  | -3.431708 | -0.664055 |
| 64 | 1 | 0 | 2.204577  | -3.368533 | 0.350889  |
| 65 | 6 | 0 | -1.226731 | -2.882770 | 0.964480  |
| 66 | 6 | 0 | -1.358999 | -4.166806 | 0.439206  |
| 67 | 1 | 0 | -0.807058 | -4.457705 | -0.444707 |
| 68 | 6 | 0 | -2.214744 | -5.087664 | 1.032233  |
| 69 | 1 | 0 | -2.311984 | -6.077591 | 0.601448  |
| 70 | 6 | 0 | -2.941196 | -4.744879 | 2.162584  |
| 71 | 1 | 0 | -3.605152 | -5.466217 | 2.625440  |
| 72 | 6 | 0 | -2.814601 | -3.466943 | 2.693892  |
| 73 | 1 | 0 | -3.374327 | -3.186358 | 3.579255  |
| 74 | 6 | 0 | -1.975851 | -2.540358 | 2.091885  |
| 75 | 1 | 0 | -1.906219 | -1.543236 | 2.506096  |
| 76 | 6 | 0 | -0.705385 | 0.276994  | -2.494557 |
| 77 | 6 | 0 | -2.514554 | 2.052435  | -1.484563 |
| 78 | 1 | 0 | -2.967444 | 1.791547  | -2.443111 |
| 79 | 1 | 0 | -1.933728 | 2.961447  | -1.623126 |
| 80 | 6 | 0 | -3.583973 | 2.246989  | -0.477599 |
| 81 | 6 | 0 | -3.596252 | 3.079224  | 0.574978  |
| 82 | 6 | 0 | -4.796414 | 3.179806  | 1.476890  |
| 83 | 1 | 0 | -5.604202 | 2.515927  | 1.158784  |
| 84 | 1 | 0 | -4.529872 | 2.935677  | 2.513406  |
| 85 | 1 | 0 | -5.189230 | 4.203129  | 1.489378  |
| 86 | 6 | 0 | -2.461673 | 3.985582  | 0.951487  |
| 87 | 1 | 0 | -2.064434 | 3.718673  | 1.938013  |
| 88 | 1 | 0 | -1.641872 | 3.950257  | 0.237154  |
| 89 | 1 | 0 | -2.803602 | 5.025093  | 1.017938  |
| 90 | 1 | 0 | -4.473071 | 1.639562  | -0.636170 |
| 91 | 8 | 0 | -2.871677 | 0.415330  | 2.324350  |
| 92 | 6 | 0 | -4.013382 | 0.109120  | 2.069649  |
| 93 | 1 | 0 | -4.432133 | 0.324900  | 1.075521  |
| 94 | 6 | 0 | -4.925602 | -0.589569 | 3.025199  |
| 95 | 1 | 0 | -5.840081 | -0.001348 | 3.149157  |
| 96 | 1 | 0 | -5.216483 | -1.546204 | 2.579116  |
| 97 | 1 | 0 | -4.443128 | -0.750346 | 3.989513  |

-----  
**D (NIMAG=0)**  
 -----

| Center<br>Number | Atomic<br>Number | Atomic<br>Type | Coordinates (Angstroms) |           |           |
|------------------|------------------|----------------|-------------------------|-----------|-----------|
|                  |                  |                | X                       | Y         | Z         |
| 1                | 44               | 0              | -1.359793               | 0.000384  | -0.592269 |
| 2                | 53               | 0              | -3.138123               | -2.128362 | -1.116826 |
| 3                | 15               | 0              | 0.149401                | 1.792402  | -0.424120 |
| 4                | 15               | 0              | 0.198129                | -1.610997 | 0.378059  |
| 5                | 8                | 0              | 4.946766                | -0.442305 | -3.117528 |
| 6                | 8                | 0              | 4.551048                | -1.046438 | -0.945271 |
| 7                | 8                | 0              | 4.424613                | 1.363280  | 1.319132  |

|    |   |   |           |           |           |
|----|---|---|-----------|-----------|-----------|
| 8  | 8 | 0 | 4.537166  | 0.912481  | 3.570991  |
| 9  | 8 | 0 | -0.581329 | -0.234209 | -3.449681 |
| 10 | 6 | 0 | 0.781464  | 2.428737  | 1.180328  |
| 11 | 6 | 0 | 0.197548  | 2.050325  | 2.385971  |
| 12 | 1 | 0 | -0.659632 | 1.389975  | 2.377330  |
| 13 | 6 | 0 | 0.730105  | 2.500148  | 3.589192  |
| 14 | 1 | 0 | 0.282871  | 2.183817  | 4.524773  |
| 15 | 6 | 0 | 1.835544  | 3.339491  | 3.596390  |
| 16 | 1 | 0 | 2.253282  | 3.681507  | 4.536456  |
| 17 | 6 | 0 | 2.410426  | 3.735388  | 2.393128  |
| 18 | 1 | 0 | 3.271934  | 4.393996  | 2.389773  |
| 19 | 6 | 0 | 1.892411  | 3.276072  | 1.192222  |
| 20 | 1 | 0 | 2.365781  | 3.559385  | 0.258513  |
| 21 | 6 | 0 | -0.359142 | 3.345831  | -1.279442 |
| 22 | 6 | 0 | -0.441140 | 4.564508  | -0.606977 |
| 23 | 1 | 0 | -0.153748 | 4.635355  | 0.433778  |
| 24 | 6 | 0 | -0.907998 | 5.703239  | -1.254900 |
| 25 | 1 | 0 | -0.966634 | 6.639127  | -0.710954 |
| 26 | 6 | 0 | -1.299007 | 5.642609  | -2.583953 |
| 27 | 1 | 0 | -1.661517 | 6.531082  | -3.088282 |
| 28 | 6 | 0 | -1.242252 | 4.429106  | -3.259531 |
| 29 | 1 | 0 | -1.570565 | 4.360452  | -4.290030 |
| 30 | 6 | 0 | -0.792859 | 3.290373  | -2.609309 |
| 31 | 1 | 0 | -0.812098 | 2.345772  | -3.139043 |
| 32 | 6 | 0 | 1.720995  | 1.289783  | -1.254692 |
| 33 | 6 | 0 | 2.013010  | 1.690758  | -2.552117 |
| 34 | 1 | 0 | 1.398942  | 2.436980  | -3.034107 |
| 35 | 6 | 0 | 3.082457  | 1.161324  | -3.285595 |
| 36 | 1 | 0 | 3.291412  | 1.485666  | -4.296078 |
| 37 | 6 | 0 | 3.842630  | 0.209697  | -2.662441 |
| 38 | 6 | 0 | 5.202410  | -1.447164 | -2.142498 |
| 39 | 1 | 0 | 6.274538  | -1.514954 | -1.965312 |
| 40 | 1 | 0 | 4.777798  | -2.400330 | -2.482051 |
| 41 | 6 | 0 | 3.589640  | -0.169245 | -1.351141 |
| 42 | 6 | 0 | 2.548806  | 0.334090  | -0.607792 |
| 43 | 6 | 0 | 2.481173  | -0.045194 | 0.830658  |
| 44 | 6 | 0 | 3.448132  | 0.477748  | 1.657257  |
| 45 | 6 | 0 | 5.212620  | 1.542301  | 2.487134  |
| 46 | 1 | 0 | 6.190102  | 1.068827  | 2.342273  |
| 47 | 1 | 0 | 5.312031  | 2.608716  | 2.696348  |
| 48 | 6 | 0 | 3.523951  | 0.198855  | 3.011561  |
| 49 | 6 | 0 | 2.656153  | -0.678505 | 3.603806  |
| 50 | 1 | 0 | 2.721868  | -0.921185 | 4.656044  |
| 51 | 6 | 0 | 1.677782  | -1.247089 | 2.779313  |
| 52 | 1 | 0 | 1.005040  | -1.964995 | 3.224334  |
| 53 | 6 | 0 | 1.556748  | -0.935754 | 1.428672  |
| 54 | 6 | 0 | 1.143611  | -2.712885 | -0.752466 |
| 55 | 6 | 0 | 0.622777  | -3.049671 | -2.001073 |
| 56 | 1 | 0 | -0.338192 | -2.661935 | -2.311663 |
| 57 | 6 | 0 | 1.313593  | -3.915152 | -2.840211 |
| 58 | 1 | 0 | 0.895818  | -4.164725 | -3.808456 |
| 59 | 6 | 0 | 2.525446  | -4.460650 | -2.436974 |
| 60 | 1 | 0 | 3.061593  | -5.139319 | -3.091380 |

|    |   |   |           |           |           |
|----|---|---|-----------|-----------|-----------|
| 61 | 6 | 0 | 3.043242  | -4.141150 | -1.186602 |
| 62 | 1 | 0 | 3.984161  | -4.569512 | -0.858800 |
| 63 | 6 | 0 | 2.358283  | -3.271440 | -0.349692 |
| 64 | 1 | 0 | 2.777125  | -3.020738 | 0.617439  |
| 65 | 6 | 0 | -0.634562 | -2.815905 | 1.493258  |
| 66 | 6 | 0 | -0.731936 | -4.164796 | 1.160722  |
| 67 | 1 | 0 | -0.259640 | -4.539885 | 0.261807  |
| 68 | 6 | 0 | -1.454296 | -5.039501 | 1.963895  |
| 69 | 1 | 0 | -1.528566 | -6.083307 | 1.681740  |
| 70 | 6 | 0 | -2.084921 | -4.581795 | 3.110937  |
| 71 | 1 | 0 | -2.650047 | -5.265665 | 3.733867  |
| 72 | 6 | 0 | -1.988873 | -3.238282 | 3.455334  |
| 73 | 1 | 0 | -2.469335 | -2.871932 | 4.356471  |
| 74 | 6 | 0 | -1.277163 | -2.362627 | 2.649299  |
| 75 | 1 | 0 | -1.210494 | -1.318187 | 2.926465  |
| 76 | 6 | 0 | -0.845737 | -0.164045 | -2.331422 |
| 77 | 6 | 0 | -2.986996 | 1.310044  | -1.310175 |
| 78 | 1 | 0 | -3.227985 | 0.952683  | -2.313600 |
| 79 | 1 | 0 | -2.603389 | 2.323389  | -1.395823 |
| 80 | 6 | 0 | -4.229471 | 1.331210  | -0.513682 |
| 81 | 6 | 0 | -4.509177 | 2.195646  | 0.480446  |
| 82 | 6 | 0 | -5.874179 | 2.267032  | 1.109088  |
| 83 | 1 | 0 | -6.499845 | 1.421444  | 0.812618  |
| 84 | 1 | 0 | -5.820762 | 2.295814  | 2.204205  |
| 85 | 1 | 0 | -6.389424 | 3.186528  | 0.805916  |
| 86 | 6 | 0 | -3.500528 | 3.223848  | 0.922902  |
| 87 | 1 | 0 | -2.508691 | 2.774477  | 1.041194  |
| 88 | 1 | 0 | -3.394127 | 4.028560  | 0.185893  |
| 89 | 1 | 0 | -3.783970 | 3.681205  | 1.875253  |
| 90 | 1 | 0 | -4.993173 | 0.602687  | -0.780815 |
| 91 | 8 | 0 | -2.191373 | 0.305632  | 1.420261  |
| 92 | 6 | 0 | -3.322330 | 0.000796  | 1.785527  |
| 93 | 1 | 0 | -3.948563 | -0.632859 | 1.150437  |
| 94 | 6 | 0 | -3.798357 | 0.326242  | 3.158453  |
| 95 | 1 | 0 | -4.867035 | 0.542503  | 3.156189  |
| 96 | 1 | 0 | -3.648737 | -0.566984 | 3.776951  |
| 97 | 1 | 0 | -3.234994 | 1.158184  | 3.582808  |

-----

**TS1B** (NIMAG=1, 335.1*i* cm<sup>-1</sup>)

-----

| Center<br>Number | Atomic<br>Number | Atomic<br>Type | Coordinates (Angstroms) |           |           |
|------------------|------------------|----------------|-------------------------|-----------|-----------|
|                  |                  |                | X                       | Y         | Z         |
| 1                | 44               | 0              | -1.355334               | 0.068677  | -0.603545 |
| 2                | 53               | 0              | -3.297235               | -1.940312 | -1.067562 |
| 3                | 15               | 0              | 0.287592                | 1.746545  | -0.490456 |
| 4                | 15               | 0              | 0.063944                | -1.609967 | 0.348546  |
| 5                | 8                | 0              | 5.118750                | -0.724254 | -2.909627 |
| 6                | 8                | 0              | 4.586161                | -1.276336 | -0.751178 |
| 7                | 8                | 0              | 4.444255                | 1.090334  | 1.465250  |
| 8                | 8                | 0              | 4.368276                | 0.709017  | 3.734246  |
| 9                | 8                | 0              | -0.600503               | -0.332481 | -3.459716 |

|    |   |   |           |           |           |
|----|---|---|-----------|-----------|-----------|
| 10 | 6 | 0 | 0.923154  | 2.429618  | 1.092183  |
| 11 | 6 | 0 | 0.296813  | 2.146426  | 2.302990  |
| 12 | 1 | 0 | -0.590730 | 1.524954  | 2.305829  |
| 13 | 6 | 0 | 0.824076  | 2.646426  | 3.488960  |
| 14 | 1 | 0 | 0.342840  | 2.406466  | 4.430329  |
| 15 | 6 | 0 | 1.963301  | 3.438998  | 3.472573  |
| 16 | 1 | 0 | 2.372556  | 3.823193  | 4.400216  |
| 17 | 6 | 0 | 2.581604  | 3.736733  | 2.261779  |
| 18 | 1 | 0 | 3.467997  | 4.361327  | 2.239432  |
| 19 | 6 | 0 | 2.071216  | 3.226614  | 1.078377  |
| 20 | 1 | 0 | 2.573986  | 3.436473  | 0.140524  |
| 21 | 6 | 0 | -0.132020 | 3.279389  | -1.427873 |
| 22 | 6 | 0 | -0.202539 | 4.522583  | -0.800396 |
| 23 | 1 | 0 | 0.053930  | 4.621813  | 0.246214  |
| 24 | 6 | 0 | -0.617672 | 5.649415  | -1.502689 |
| 25 | 1 | 0 | -0.669480 | 6.604908  | -0.993297 |
| 26 | 6 | 0 | -0.965448 | 5.552482  | -2.841253 |
| 27 | 1 | 0 | -1.286871 | 6.431729  | -3.387770 |
| 28 | 6 | 0 | -0.918063 | 4.314768  | -3.472998 |
| 29 | 1 | 0 | -1.211579 | 4.219217  | -4.511877 |
| 30 | 6 | 0 | -0.521365 | 3.188553  | -2.769593 |
| 31 | 1 | 0 | -0.548776 | 2.227394  | -3.267836 |
| 32 | 6 | 0 | 1.844792  | 1.128429  | -1.264033 |
| 33 | 6 | 0 | 2.210520  | 1.486067  | -2.555408 |
| 34 | 1 | 0 | 1.646851  | 2.240019  | -3.084409 |
| 35 | 6 | 0 | 3.301451  | 0.909781  | -3.217990 |
| 36 | 1 | 0 | 3.572046  | 1.201692  | -4.223736 |
| 37 | 6 | 0 | 4.006695  | -0.039214 | -2.529360 |
| 38 | 6 | 0 | 5.310079  | -1.704806 | -1.896418 |
| 39 | 1 | 0 | 6.368964  | -1.769978 | -1.650623 |
| 40 | 1 | 0 | 4.906187  | -2.664900 | -2.240645 |
| 41 | 6 | 0 | 3.674187  | -0.381604 | -1.226239 |
| 42 | 6 | 0 | 2.607029  | 0.164333  | -0.552849 |
| 43 | 6 | 0 | 2.431235  | -0.177646 | 0.885243  |
| 44 | 6 | 0 | 3.374740  | 0.304229  | 1.762521  |
| 45 | 6 | 0 | 5.101024  | 1.354939  | 2.697189  |
| 46 | 1 | 0 | 6.115618  | 0.948164  | 2.661767  |
| 47 | 1 | 0 | 5.107663  | 2.432685  | 2.879461  |
| 48 | 6 | 0 | 3.334043  | 0.070813  | 3.126999  |
| 49 | 6 | 0 | 2.355995  | -0.707235 | 3.685142  |
| 50 | 1 | 0 | 2.325105  | -0.906586 | 4.747954  |
| 51 | 6 | 0 | 1.396333  | -1.233168 | 2.811943  |
| 52 | 1 | 0 | 0.628900  | -1.867441 | 3.231064  |
| 53 | 6 | 0 | 1.403917  | -0.977737 | 1.444874  |
| 54 | 6 | 0 | 0.986259  | -2.734079 | -0.775253 |
| 55 | 6 | 0 | 0.416849  | -3.124404 | -1.986881 |
| 56 | 1 | 0 | -0.554774 | -2.746910 | -2.278239 |
| 57 | 6 | 0 | 1.071331  | -4.031982 | -2.809741 |
| 58 | 1 | 0 | 0.617120  | -4.322376 | -3.749749 |
| 59 | 6 | 0 | 2.293050  | -4.569469 | -2.425384 |
| 60 | 1 | 0 | 2.800544  | -5.281410 | -3.066985 |
| 61 | 6 | 0 | 2.855196  | -4.201411 | -1.208450 |
| 62 | 1 | 0 | 3.799559  | -4.629589 | -0.890187 |

|    |   |   |           |           |           |
|----|---|---|-----------|-----------|-----------|
| 63 | 6 | 0 | 2.206867  | -3.288997 | -0.387375 |
| 64 | 1 | 0 | 2.658318  | -3.006467 | 0.555707  |
| 65 | 6 | 0 | -0.824657 | -2.803718 | 1.430008  |
| 66 | 6 | 0 | -0.767647 | -4.178985 | 1.221336  |
| 67 | 1 | 0 | -0.167570 | -4.588871 | 0.419234  |
| 68 | 6 | 0 | -1.501588 | -5.040946 | 2.028729  |
| 69 | 1 | 0 | -1.457786 | -6.108549 | 1.846208  |
| 70 | 6 | 0 | -2.292475 | -4.541612 | 3.052735  |
| 71 | 1 | 0 | -2.868495 | -5.216752 | 3.675395  |
| 72 | 6 | 0 | -2.348729 | -3.169474 | 3.270523  |
| 73 | 1 | 0 | -2.968171 | -2.768263 | 4.065211  |
| 74 | 6 | 0 | -1.625877 | -2.308584 | 2.460746  |
| 75 | 1 | 0 | -1.681085 | -1.239666 | 2.614607  |
| 76 | 6 | 0 | -0.857710 | -0.208855 | -2.344976 |
| 77 | 6 | 0 | -2.922645 | 1.564361  | -1.366419 |
| 78 | 1 | 0 | -3.117063 | 1.205381  | -2.375024 |
| 79 | 1 | 0 | -2.447765 | 2.538554  | -1.357548 |
| 80 | 6 | 0 | -4.067853 | 1.485865  | -0.529676 |
| 81 | 6 | 0 | -4.265204 | 2.165991  | 0.659906  |
| 82 | 6 | 0 | -5.672691 | 2.236648  | 1.210392  |
| 83 | 1 | 0 | -6.196213 | 1.282665  | 1.097170  |
| 84 | 1 | 0 | -5.681136 | 2.513723  | 2.267402  |
| 85 | 1 | 0 | -6.253835 | 2.998580  | 0.679085  |
| 86 | 6 | 0 | -3.336868 | 3.299120  | 1.021198  |
| 87 | 1 | 0 | -2.294267 | 2.970888  | 0.989937  |
| 88 | 1 | 0 | -3.439887 | 4.133251  | 0.317883  |
| 89 | 1 | 0 | -3.545784 | 3.681035  | 2.024076  |
| 90 | 1 | 0 | -4.829665 | 0.759071  | -0.804433 |
| 91 | 8 | 0 | -2.113526 | 0.580342  | 1.333382  |
| 92 | 6 | 0 | -3.334448 | 0.516455  | 1.684470  |
| 93 | 1 | 0 | -3.971098 | -0.250918 | 1.235848  |
| 94 | 6 | 0 | -3.634976 | 0.850049  | 3.123058  |
| 95 | 1 | 0 | -4.704321 | 0.895380  | 3.324267  |
| 96 | 1 | 0 | -3.216160 | 0.046612  | 3.739705  |
| 97 | 1 | 0 | -3.155570 | 1.785649  | 3.418706  |

-----  
**E (NIMAG=0)**  
 -----

| Center<br>Number | Atomic<br>Number | Atomic<br>Type | Coordinates (Angstroms) |           |           |
|------------------|------------------|----------------|-------------------------|-----------|-----------|
|                  |                  |                | X                       | Y         | Z         |
| 1                | 44               | 0              | -1.434938               | 0.329857  | -0.561471 |
| 2                | 53               | 0              | -3.605442               | -1.463513 | -1.023213 |
| 3                | 15               | 0              | 0.527867                | 1.682990  | -0.519116 |
| 4                | 15               | 0              | -0.274166               | -1.552646 | 0.289295  |
| 5                | 8                | 0              | 5.025590                | -1.483520 | -2.788911 |
| 6                | 8                | 0              | 4.370869                | -1.913751 | -0.633048 |
| 7                | 8                | 0              | 4.483387                | 0.340060  | 1.564733  |
| 8                | 8                | 0              | 4.223077                | 0.039731  | 3.831933  |
| 9                | 8                | 0              | -0.911555               | -0.125961 | -3.485576 |
| 10               | 6                | 0              | 1.300449                | 2.291807  | 1.030810  |
| 11               | 6                | 0              | 0.665516                | 2.126129  | 2.258719  |



|    |   |   |           |           |           |
|----|---|---|-----------|-----------|-----------|
| 12 | 1 | 0 | -0.293352 | 1.612603  | 2.282882  |
| 13 | 6 | 0 | 1.284205  | 2.580437  | 3.418860  |
| 14 | 1 | 0 | 0.794312  | 2.433906  | 4.374949  |
| 15 | 6 | 0 | 2.523034  | 3.202940  | 3.359091  |
| 16 | 1 | 0 | 3.000663  | 3.553344  | 4.267514  |
| 17 | 6 | 0 | 3.156713  | 3.370153  | 2.130303  |
| 18 | 1 | 0 | 4.125044  | 3.855645  | 2.075580  |
| 19 | 6 | 0 | 2.553997  | 2.908072  | 0.971096  |
| 20 | 1 | 0 | 3.062004  | 3.018422  | 0.019033  |
| 21 | 6 | 0 | 0.384721  | 3.238087  | -1.507126 |
| 22 | 6 | 0 | 0.500149  | 4.488507  | -0.899911 |
| 23 | 1 | 0 | 0.747385  | 4.564861  | 0.150651  |
| 24 | 6 | 0 | 0.281047  | 5.654523  | -1.626464 |
| 25 | 1 | 0 | 0.370088  | 6.614219  | -1.130533 |
| 26 | 6 | 0 | -0.051593 | 5.591652  | -2.970751 |
| 27 | 1 | 0 | -0.219946 | 6.501058  | -3.536005 |
| 28 | 6 | 0 | -0.184548 | 4.350982  | -3.584463 |
| 29 | 1 | 0 | -0.464749 | 4.284961  | -4.629377 |
| 30 | 6 | 0 | 0.017060  | 3.188425  | -2.857512 |
| 31 | 1 | 0 | -0.150526 | 2.237664  | -3.347029 |
| 32 | 6 | 0 | 1.947869  | 0.781629  | -1.285000 |
| 33 | 6 | 0 | 2.378820  | 1.047583  | -2.579021 |
| 34 | 1 | 0 | 1.930719  | 1.850256  | -3.143800 |
| 35 | 6 | 0 | 3.407990  | 0.326493  | -3.195946 |
| 36 | 1 | 0 | 3.731638  | 0.551160  | -4.203273 |
| 37 | 6 | 0 | 3.990673  | -0.667074 | -2.457166 |
| 38 | 6 | 0 | 5.109680  | -2.431816 | -1.731295 |
| 39 | 1 | 0 | 6.151655  | -2.556580 | -1.438333 |
| 40 | 1 | 0 | 4.659692  | -3.376534 | -2.057916 |
| 41 | 6 | 0 | 3.589475  | -0.927936 | -1.155815 |
| 42 | 6 | 0 | 2.573222  | -0.244736 | -0.529501 |
| 43 | 6 | 0 | 2.292706  | -0.533278 | 0.901066  |
| 44 | 6 | 0 | 3.268498  | -0.217068 | 1.817506  |
| 45 | 6 | 0 | 5.097013  | 0.550085  | 2.829182  |
| 46 | 1 | 0 | 6.045631  | 0.008652  | 2.865738  |
| 47 | 1 | 0 | 5.239470  | 1.622686  | 2.988320  |
| 48 | 6 | 0 | 3.114151  | -0.398464 | 3.181791  |
| 49 | 6 | 0 | 1.971345  | -0.943405 | 3.702917  |
| 50 | 1 | 0 | 1.844520  | -1.088404 | 4.767307  |
| 51 | 6 | 0 | 0.972154  | -1.300696 | 2.790955  |
| 52 | 1 | 0 | 0.068204  | -1.746056 | 3.179886  |
| 53 | 6 | 0 | 1.105752  | -1.108108 | 1.420832  |
| 54 | 6 | 0 | 0.520119  | -2.720842 | -0.884181 |
| 55 | 6 | 0 | -0.086569 | -3.001750 | -2.107061 |
| 56 | 1 | 0 | -1.004119 | -2.502480 | -2.388098 |
| 57 | 6 | 0 | 0.452811  | -3.960413 | -2.955583 |
| 58 | 1 | 0 | -0.028872 | -4.162505 | -3.904957 |
| 59 | 6 | 0 | 1.589970  | -4.664206 | -2.582413 |
| 60 | 1 | 0 | 2.005033  | -5.417880 | -3.242363 |
| 61 | 6 | 0 | 2.182187  | -4.410832 | -1.350500 |
| 62 | 1 | 0 | 3.053626  | -4.974601 | -1.035754 |
| 63 | 6 | 0 | 1.652997  | -3.444670 | -0.506854 |
| 64 | 1 | 0 | 2.126278  | -3.257769 | 0.449102  |

|    |   |   |           |           |           |
|----|---|---|-----------|-----------|-----------|
| 65 | 6 | 0 | -1.292246 | -2.700110 | 1.310670  |
| 66 | 6 | 0 | -1.234051 | -4.080526 | 1.132221  |
| 67 | 1 | 0 | -0.599121 | -4.516239 | 0.372453  |
| 68 | 6 | 0 | -2.016602 | -4.919679 | 1.917562  |
| 69 | 1 | 0 | -1.971018 | -5.991243 | 1.759831  |
| 70 | 6 | 0 | -2.856636 | -4.392047 | 2.886923  |
| 71 | 1 | 0 | -3.469344 | -5.049978 | 3.493121  |
| 72 | 6 | 0 | -2.916482 | -3.014943 | 3.068071  |
| 73 | 1 | 0 | -3.579506 | -2.590050 | 3.813404  |
| 74 | 6 | 0 | -2.145789 | -2.173809 | 2.281946  |
| 75 | 1 | 0 | -2.192437 | -1.097386 | 2.385771  |
| 76 | 6 | 0 | -1.094211 | 0.013276  | -2.359876 |
| 77 | 6 | 0 | -2.673774 | 2.310089  | -1.437249 |
| 78 | 1 | 0 | -2.890420 | 1.992624  | -2.450822 |
| 79 | 1 | 0 | -2.014083 | 3.156129  | -1.320872 |
| 80 | 6 | 0 | -3.450051 | 1.886444  | -0.414048 |
| 81 | 6 | 0 | -3.469229 | 2.403494  | 0.998368  |
| 82 | 6 | 0 | -4.917029 | 2.828930  | 1.295746  |
| 83 | 1 | 0 | -5.600022 | 1.977103  | 1.227594  |
| 84 | 1 | 0 | -4.994768 | 3.250391  | 2.300993  |
| 85 | 1 | 0 | -5.253402 | 3.592036  | 0.587884  |
| 86 | 6 | 0 | -2.523069 | 3.583848  | 1.208778  |
| 87 | 1 | 0 | -1.484507 | 3.293788  | 1.047195  |
| 88 | 1 | 0 | -2.762415 | 4.405668  | 0.527329  |
| 89 | 1 | 0 | -2.605179 | 3.966599  | 2.228639  |
| 90 | 1 | 0 | -4.230725 | 1.166874  | -0.632391 |
| 91 | 8 | 0 | -1.817221 | 0.707160  | 1.473989  |
| 92 | 6 | 0 | -3.064266 | 1.168820  | 1.867246  |
| 93 | 1 | 0 | -3.845882 | 0.407987  | 1.679117  |
| 94 | 6 | 0 | -3.041012 | 1.445694  | 3.369423  |
| 95 | 1 | 0 | -4.008232 | 1.794686  | 3.741394  |
| 96 | 1 | 0 | -2.790995 | 0.523329  | 3.899998  |
| 97 | 1 | 0 | -2.278347 | 2.188500  | 3.619105  |

-----  
**F (NIMAG=0)**  
 -----

| Center<br>Number | Atomic<br>Number | Atomic<br>Type | Coordinates (Angstroms) |           |           |
|------------------|------------------|----------------|-------------------------|-----------|-----------|
|                  |                  |                | X                       | Y         | Z         |
| 1                | 44               | 0              | 1.427424                | 1.088692  | 0.119728  |
| 2                | 53               | 0              | 3.922264                | -0.136598 | 0.782953  |
| 3                | 15               | 0              | -0.836484               | 1.739192  | 0.097857  |
| 4                | 15               | 0              | 0.833486                | -1.206986 | -0.380235 |
| 5                | 8                | 0              | -3.313141               | -2.086009 | 3.912214  |
| 6                | 8                | 0              | -2.974914               | -2.782212 | 1.756531  |
| 7                | 8                | 0              | -4.415634               | -1.303951 | -0.653574 |
| 8                | 8                | 0              | -4.518675               | -2.227612 | -2.758406 |
| 9                | 8                | 0              | 1.232577                | 1.128403  | 3.117533  |
| 10               | 6                | 0              | -1.745962               | 0.655298  | 1.287389  |
| 11               | 6                | 0              | -2.004952               | 1.075223  | 2.585678  |
| 12               | 1                | 0              | -1.793415               | 2.095180  | 2.872106  |
| 13               | 6                | 0              | -2.530947               | 0.224058  | 3.565426  |

|    |   |   |           |           |           |
|----|---|---|-----------|-----------|-----------|
| 14 | 1 | 0 | -2.723640 | 0.569853  | 4.572003  |
| 15 | 6 | 0 | -2.782293 | -1.066371 | 3.186009  |
| 16 | 6 | 0 | -3.171914 | -3.238116 | 3.087138  |
| 17 | 1 | 0 | -4.084637 | -3.830386 | 3.134576  |
| 18 | 1 | 0 | -2.291440 | -3.808676 | 3.406309  |
| 19 | 6 | 0 | -2.563783 | -1.490576 | 1.882604  |
| 20 | 6 | 0 | -2.049478 | -0.678522 | 0.898697  |
| 21 | 6 | 0 | -1.972241 | -1.238187 | -0.479762 |
| 22 | 6 | 0 | -3.156227 | -1.523938 | -1.118471 |
| 23 | 6 | 0 | -5.296973 | -1.657695 | -1.709739 |
| 24 | 1 | 0 | -6.015951 | -2.396508 | -1.349517 |
| 25 | 1 | 0 | -5.797546 | -0.757707 | -2.080891 |
| 26 | 6 | 0 | -3.219499 | -2.084508 | -2.384326 |
| 27 | 6 | 0 | -2.085431 | -2.417632 | -3.074943 |
| 28 | 1 | 0 | -2.130139 | -2.867700 | -4.057799 |
| 29 | 6 | 0 | -0.864343 | -2.139649 | -2.447512 |
| 30 | 1 | 0 | 0.046433  | -2.399577 | -2.969302 |
| 31 | 6 | 0 | -0.787900 | -1.557026 | -1.187891 |
| 32 | 6 | 0 | 1.294857  | 1.029618  | 1.974897  |
| 33 | 6 | 0 | 2.242779  | 3.138390  | 0.229402  |
| 34 | 1 | 0 | 2.989959  | 3.339547  | 0.991564  |
| 35 | 1 | 0 | 1.408830  | 3.829219  | 0.236564  |
| 36 | 6 | 0 | 2.710556  | 2.606543  | -1.002823 |
| 37 | 6 | 0 | 1.779043  | 2.270174  | -2.000226 |
| 38 | 1 | 0 | 2.221907  | 1.748026  | -2.847742 |
| 39 | 6 | 0 | 4.176168  | 2.433191  | -1.294233 |
| 40 | 1 | 0 | 4.378820  | 1.527569  | -1.867776 |
| 41 | 1 | 0 | 4.463144  | 3.298046  | -1.905670 |
| 42 | 1 | 0 | 4.790626  | 2.423866  | -0.397087 |
| 43 | 6 | 0 | 0.753550  | 3.303082  | -2.432726 |
| 44 | 1 | 0 | 1.285884  | 4.108461  | -2.953987 |
| 45 | 1 | 0 | 0.013207  | 2.914158  | -3.127874 |
| 46 | 1 | 0 | 0.223214  | 3.766217  | -1.601328 |
| 47 | 6 | 0 | -1.959417 | 1.585144  | -1.355797 |
| 48 | 6 | 0 | -3.324113 | 1.830611  | -1.187862 |
| 49 | 6 | 0 | -1.501642 | 1.133331  | -2.588392 |
| 50 | 6 | 0 | -4.203417 | 1.671714  | -2.249208 |
| 51 | 1 | 0 | -3.704743 | 2.133028  | -0.218523 |
| 52 | 6 | 0 | -2.382293 | 0.959495  | -3.647106 |
| 53 | 1 | 0 | -0.455754 | 0.879185  | -2.702250 |
| 54 | 6 | 0 | -3.733185 | 1.237614  | -3.483410 |
| 55 | 1 | 0 | -5.258551 | 1.877491  | -2.106848 |
| 56 | 1 | 0 | -2.012978 | 0.588711  | -4.595953 |
| 57 | 1 | 0 | -4.420163 | 1.100054  | -4.310814 |
| 58 | 6 | 0 | -1.154184 | 3.466506  | 0.678581  |
| 59 | 6 | 0 | -1.889028 | 4.389337  | -0.067359 |
| 60 | 6 | 0 | -0.544549 | 3.907646  | 1.858671  |
| 61 | 6 | 0 | -2.040957 | 5.699932  | 0.371008  |
| 62 | 1 | 0 | -2.337464 | 4.098934  | -1.008147 |
| 63 | 6 | 0 | -0.710084 | 5.210670  | 2.303997  |
| 64 | 1 | 0 | 0.087479  | 3.240784  | 2.430378  |
| 65 | 6 | 0 | -1.463141 | 6.112595  | 1.562379  |
| 66 | 1 | 0 | -2.612184 | 6.398780  | -0.229295 |

|    |   |   |           |           |           |
|----|---|---|-----------|-----------|-----------|
| 67 | 1 | 0 | -0.231875 | 5.523702  | 3.224823  |
| 68 | 1 | 0 | -1.584096 | 7.134147  | 1.904061  |
| 69 | 6 | 0 | 0.688919  | -2.437233 | 0.997899  |
| 70 | 6 | 0 | 0.022956  | -3.645406 | 0.766624  |
| 71 | 6 | 0 | 1.226409  | -2.205126 | 2.261037  |
| 72 | 6 | 0 | -0.092238 | -4.596356 | 1.769862  |
| 73 | 1 | 0 | -0.415685 | -3.847247 | -0.203103 |
| 74 | 6 | 0 | 1.095020  | -3.149131 | 3.272259  |
| 75 | 1 | 0 | 1.778078  | -1.300168 | 2.460816  |
| 76 | 6 | 0 | 0.439997  | -4.348648 | 3.030078  |
| 77 | 1 | 0 | -0.606800 | -5.528734 | 1.565758  |
| 78 | 1 | 0 | 1.519738  | -2.944073 | 4.247925  |
| 79 | 1 | 0 | 0.349385  | -5.089990 | 3.816774  |
| 80 | 6 | 0 | 2.010248  | -2.001577 | -1.548405 |
| 81 | 6 | 0 | 2.581633  | -3.250552 | -1.325326 |
| 82 | 6 | 0 | 2.353551  | -1.294545 | -2.700791 |
| 83 | 6 | 0 | 3.477155  | -3.784055 | -2.245291 |
| 84 | 1 | 0 | 2.352422  | -3.803452 | -0.423423 |
| 85 | 6 | 0 | 3.236956  | -1.832097 | -3.624074 |
| 86 | 1 | 0 | 1.933167  | -0.309208 | -2.861470 |
| 87 | 6 | 0 | 3.804031  | -3.081153 | -3.396155 |
| 88 | 1 | 0 | 3.927815  | -4.750879 | -2.052245 |
| 89 | 1 | 0 | 3.494980  | -1.269459 | -4.514260 |
| 90 | 1 | 0 | 4.506744  | -3.498467 | -4.108449 |

-----

**G (NIMAG=0)**

| Center<br>Number | Atomic<br>Number | Atomic<br>Type | Coordinates (Angstroms) |           |           |
|------------------|------------------|----------------|-------------------------|-----------|-----------|
|                  |                  |                | X                       | Y         | Z         |
| 1                | 44               | 0              | -1.450357               | 0.885311  | -0.318518 |
| 2                | 53               | 0              | -3.938125               | -0.304638 | -0.877478 |
| 3                | 15               | 0              | 0.746951                | 1.713262  | -0.269808 |
| 4                | 15               | 0              | -0.729581               | -1.343693 | 0.385730  |
| 5                | 8                | 0              | 3.511437                | -2.286332 | -3.678241 |
| 6                | 8                | 0              | 3.191616                | -2.812778 | -1.472909 |
| 7                | 8                | 0              | 4.476687                | -0.945645 | 0.915089  |
| 8                | 8                | 0              | 4.534184                | -1.586692 | 3.116510  |
| 9                | 8                | 0              | -1.205525               | 0.727600  | -3.255560 |
| 10               | 6                | 0              | 1.729482                | 1.764221  | 1.282525  |
| 11               | 6                | 0              | 1.108184                | 1.581868  | 2.514065  |
| 12               | 1                | 0              | 0.034054                | 1.438609  | 2.555981  |
| 13               | 6                | 0              | 1.855301                | 1.574043  | 3.684607  |
| 14               | 1                | 0              | 1.360466                | 1.417013  | 4.635944  |
| 15               | 6                | 0              | 3.231285                | 1.753850  | 3.634393  |
| 16               | 1                | 0              | 3.815008                | 1.740247  | 4.547566  |
| 17               | 6                | 0              | 3.861086                | 1.929493  | 2.407760  |
| 18               | 1                | 0              | 4.936871                | 2.054513  | 2.358946  |
| 19               | 6                | 0              | 3.116502                | 1.922175  | 1.237564  |
| 20               | 1                | 0              | 3.620810                | 2.005023  | 0.281078  |
| 21               | 6                | 0              | 1.027788                | 3.375711  | -1.027337 |
| 22               | 6                | 0              | 1.931385                | 4.308507  | -0.515592 |

|    |   |   |           |           |           |
|----|---|---|-----------|-----------|-----------|
| 23 | 1 | 0 | 2.508142  | 4.085168  | 0.371294  |
| 24 | 6 | 0 | 2.079080  | 5.554653  | -1.110714 |
| 25 | 1 | 0 | 2.780632  | 6.266074  | -0.690153 |
| 26 | 6 | 0 | 1.329104  | 5.891949  | -2.229077 |
| 27 | 1 | 0 | 1.444090  | 6.865938  | -2.690816 |
| 28 | 6 | 0 | 0.419575  | 4.977126  | -2.742416 |
| 29 | 1 | 0 | -0.184649 | 5.230339  | -3.605720 |
| 30 | 6 | 0 | 0.263541  | 3.735682  | -2.141064 |
| 31 | 1 | 0 | -0.472404 | 3.051819  | -2.541404 |
| 32 | 6 | 0 | 1.766779  | 0.578126  | -1.310379 |
| 33 | 6 | 0 | 2.010066  | 0.898003  | -2.640408 |
| 34 | 1 | 0 | 1.728440  | 1.872546  | -3.015344 |
| 35 | 6 | 0 | 2.594006  | -0.003053 | -3.539526 |
| 36 | 1 | 0 | 2.769688  | 0.261823  | -4.573347 |
| 37 | 6 | 0 | 2.918552  | -1.237699 | -3.046394 |
| 38 | 6 | 0 | 3.406303  | -3.370832 | -2.761970 |
| 39 | 1 | 0 | 4.337620  | -3.934914 | -2.761147 |
| 40 | 1 | 0 | 2.544814  | -3.993794 | -3.032299 |
| 41 | 6 | 0 | 2.711664  | -1.560205 | -1.711722 |
| 42 | 6 | 0 | 2.138121  | -0.698855 | -0.806838 |
| 43 | 6 | 0 | 2.050967  | -1.140970 | 0.612409  |
| 44 | 6 | 0 | 3.217519  | -1.257414 | 1.329890  |
| 45 | 6 | 0 | 5.335050  | -1.382126 | 1.958675  |
| 46 | 1 | 0 | 5.807084  | -2.329160 | 1.669104  |
| 47 | 1 | 0 | 6.076879  | -0.610798 | 2.164265  |
| 48 | 6 | 0 | 3.253247  | -1.648740 | 2.659658  |
| 49 | 6 | 0 | 2.112201  | -1.987495 | 3.336790  |
| 50 | 1 | 0 | 2.136700  | -2.294223 | 4.373967  |
| 51 | 6 | 0 | 0.911758  | -1.906042 | 2.621181  |
| 52 | 1 | 0 | -0.003782 | -2.181846 | 3.126695  |
| 53 | 6 | 0 | 0.862258  | -1.488743 | 1.295457  |
| 54 | 6 | 0 | -0.529566 | -2.699346 | -0.840565 |
| 55 | 6 | 0 | -1.121068 | -2.612099 | -2.099247 |
| 56 | 1 | 0 | -1.726601 | -1.754867 | -2.357504 |
| 57 | 6 | 0 | -0.960136 | -3.637552 | -3.022606 |
| 58 | 1 | 0 | -1.425077 | -3.553067 | -3.997756 |
| 59 | 6 | 0 | -0.216930 | -4.764093 | -2.695125 |
| 60 | 1 | 0 | -0.099739 | -5.566987 | -3.414906 |
| 61 | 6 | 0 | 0.373076  | -4.860682 | -1.439560 |
| 62 | 1 | 0 | 0.956323  | -5.735644 | -1.174787 |
| 63 | 6 | 0 | 0.224876  | -3.831405 | -0.520705 |
| 64 | 1 | 0 | 0.707834  | -3.906164 | 0.446626  |
| 65 | 6 | 0 | -1.922845 | -1.979044 | 1.623970  |
| 66 | 6 | 0 | -2.394906 | -3.286898 | 1.635396  |
| 67 | 1 | 0 | -2.061664 | -3.992083 | 0.883571  |
| 68 | 6 | 0 | -3.317278 | -3.687162 | 2.596188  |
| 69 | 1 | 0 | -3.690684 | -4.704788 | 2.588289  |
| 70 | 6 | 0 | -3.768405 | -2.788139 | 3.552300  |
| 71 | 1 | 0 | -4.493486 | -3.101838 | 4.294576  |
| 72 | 6 | 0 | -3.300754 | -1.478159 | 3.545070  |
| 73 | 1 | 0 | -3.661716 | -0.763994 | 4.276207  |
| 74 | 6 | 0 | -2.389017 | -1.076590 | 2.582221  |
| 75 | 1 | 0 | -2.053565 | -0.042371 | 2.566024  |

|    |   |   |           |          |           |
|----|---|---|-----------|----------|-----------|
| 76 | 6 | 0 | -1.297382 | 0.775740 | -2.107291 |
| 77 | 6 | 0 | -2.448491 | 2.765458 | -0.278108 |
| 78 | 1 | 0 | -3.383441 | 2.726558 | -0.835676 |
| 79 | 1 | 0 | -1.850849 | 3.609863 | -0.618004 |
| 80 | 6 | 0 | -2.674195 | 2.765294 | 1.193540  |
| 81 | 6 | 0 | -1.832108 | 3.356108 | 2.074496  |
| 82 | 1 | 0 | -2.088139 | 3.273281 | 3.130388  |
| 83 | 6 | 0 | -3.954714 | 2.176359 | 1.752675  |
| 84 | 1 | 0 | -4.012503 | 2.331229 | 2.833053  |
| 85 | 1 | 0 | -4.808740 | 2.682437 | 1.291871  |
| 86 | 1 | 0 | -4.081976 | 1.115850 | 1.541106  |
| 87 | 6 | 0 | -0.710041 | 4.300433 | 1.784832  |
| 88 | 1 | 0 | -0.945961 | 5.271275 | 2.235478  |
| 89 | 1 | 0 | 0.236676  | 3.976398 | 2.225473  |
| 90 | 1 | 0 | -0.554067 | 4.461175 | 0.720419  |

-----

**H (NIMAG=0)**

| Center<br>Number | Atomic<br>Number | Atomic<br>Type | Coordinates (Angstroms) |           |           |
|------------------|------------------|----------------|-------------------------|-----------|-----------|
|                  |                  |                | X                       | Y         | Z         |
| 1                | 44               | 0              | -1.321323               | 0.242208  | -0.776334 |
| 2                | 53               | 0              | -3.217395               | -1.690997 | -1.337798 |
| 3                | 15               | 0              | 0.391293                | 1.806372  | -0.398018 |
| 4                | 15               | 0              | 0.035254                | -1.597518 | 0.221715  |
| 5                | 8                | 0              | 5.203631                | -0.751175 | -2.770296 |
| 6                | 8                | 0              | 4.581877                | -1.402296 | -0.663833 |
| 7                | 8                | 0              | 4.450301                | 0.830208  | 1.734431  |
| 8                | 8                | 0              | 4.294446                | 0.233138  | 3.942952  |
| 9                | 8                | 0              | -0.421887               | 0.085921  | -3.570207 |
| 10               | 6                | 0              | 0.825633                | 2.199225  | 1.334490  |
| 11               | 6                | 0              | -0.018184               | 1.781521  | 2.358397  |
| 12               | 1                | 0              | -0.937931               | 1.247596  | 2.141469  |
| 13               | 6                | 0              | 0.309324                | 2.036988  | 3.683973  |
| 14               | 1                | 0              | -0.357238               | 1.697667  | 4.467794  |
| 15               | 6                | 0              | 1.480969                | 2.715140  | 3.991033  |
| 16               | 1                | 0              | 1.741734                | 2.908013  | 5.025446  |
| 17               | 6                | 0              | 2.328702                | 3.136824  | 2.971259  |
| 18               | 1                | 0              | 3.248359                | 3.659855  | 3.208133  |
| 19               | 6                | 0              | 2.006742                | 2.875377  | 1.648383  |
| 20               | 1                | 0              | 2.688710                | 3.170042  | 0.858043  |
| 21               | 6                | 0              | 0.210100                | 3.460425  | -1.196222 |
| 22               | 6                | 0              | 0.400168                | 4.654510  | -0.501358 |
| 23               | 1                | 0              | 0.671794                | 4.641164  | 0.545826  |
| 24               | 6                | 0              | 0.217651                | 5.879160  | -1.133059 |
| 25               | 1                | 0              | 0.364994                | 6.794875  | -0.572066 |
| 26               | 6                | 0              | -0.157134               | 5.930765  | -2.467531 |
| 27               | 1                | 0              | -0.300252               | 6.886712  | -2.958160 |
| 28               | 6                | 0              | -0.366074               | 4.748243  | -3.166502 |
| 29               | 1                | 0              | -0.680074               | 4.772995  | -4.203418 |
| 30               | 6                | 0              | -0.196554               | 3.526090  | -2.533423 |
| 31               | 1                | 0              | -0.400345               | 2.618954  | -3.088811 |

|    |   |   |           |           |           |
|----|---|---|-----------|-----------|-----------|
| 32 | 6 | 0 | 1.970583  | 1.157273  | -1.101607 |
| 33 | 6 | 0 | 2.390308  | 1.567903  | -2.362302 |
| 34 | 1 | 0 | 1.872422  | 2.371224  | -2.865081 |
| 35 | 6 | 0 | 3.472131  | 0.982177  | -3.029295 |
| 36 | 1 | 0 | 3.781319  | 1.317562  | -4.009977 |
| 37 | 6 | 0 | 4.115168  | -0.035998 | -2.379185 |
| 38 | 6 | 0 | 5.316547  | -1.798986 | -1.813798 |
| 39 | 1 | 0 | 6.363373  | -1.932890 | -1.545354 |
| 40 | 1 | 0 | 4.875257  | -2.714718 | -2.226022 |
| 41 | 6 | 0 | 3.728280  | -0.436539 | -1.108775 |
| 42 | 6 | 0 | 2.666954  | 0.117327  | -0.431042 |
| 43 | 6 | 0 | 2.433758  | -0.334218 | 0.967119  |
| 44 | 6 | 0 | 3.366201  | 0.023968  | 1.911665  |
| 45 | 6 | 0 | 5.172280  | 0.759309  | 2.955181  |
| 46 | 1 | 0 | 6.029209  | 0.085176  | 2.832254  |
| 47 | 1 | 0 | 5.488262  | 1.760047  | 3.248171  |
| 48 | 6 | 0 | 3.275244  | -0.339119 | 3.245507  |
| 49 | 6 | 0 | 2.254766  | -1.131421 | 3.698032  |
| 50 | 1 | 0 | 2.179246  | -1.425871 | 4.736169  |
| 51 | 6 | 0 | 1.305238  | -1.532526 | 2.751672  |
| 52 | 1 | 0 | 0.500451  | -2.170478 | 3.086524  |
| 53 | 6 | 0 | 1.363268  | -1.142512 | 1.417061  |
| 54 | 6 | 0 | 0.943333  | -2.696357 | -0.939267 |
| 55 | 6 | 0 | 0.453856  | -2.913625 | -2.226446 |
| 56 | 1 | 0 | -0.457110 | -2.429005 | -2.551140 |
| 57 | 6 | 0 | 1.111307  | -3.779854 | -3.090910 |
| 58 | 1 | 0 | 0.719994  | -3.934619 | -4.089490 |
| 59 | 6 | 0 | 2.256316  | -4.446655 | -2.675183 |
| 60 | 1 | 0 | 2.765825  | -5.125911 | -3.349763 |
| 61 | 6 | 0 | 2.739997  | -4.248070 | -1.386814 |
| 62 | 1 | 0 | 3.625064  | -4.775352 | -1.047636 |
| 63 | 6 | 0 | 2.090098  | -3.376492 | -0.523975 |
| 64 | 1 | 0 | 2.482142  | -3.221785 | 0.473917  |
| 65 | 6 | 0 | -0.970643 | -2.774540 | 1.202949  |
| 66 | 6 | 0 | -0.995163 | -4.143172 | 0.957982  |
| 67 | 1 | 0 | -0.385763 | -4.569093 | 0.170439  |
| 68 | 6 | 0 | -1.823481 | -4.969910 | 1.709518  |
| 69 | 1 | 0 | -1.846157 | -6.033748 | 1.502635  |
| 70 | 6 | 0 | -2.622728 | -4.438875 | 2.711853  |
| 71 | 1 | 0 | -3.268618 | -5.087144 | 3.293217  |
| 72 | 6 | 0 | -2.596076 | -3.071020 | 2.963413  |
| 73 | 1 | 0 | -3.214204 | -2.643592 | 3.745303  |
| 74 | 6 | 0 | -1.781384 | -2.244170 | 2.206672  |
| 75 | 1 | 0 | -1.775698 | -1.177956 | 2.410021  |
| 76 | 6 | 0 | -0.749306 | 0.135056  | -2.466114 |
| 77 | 6 | 0 | -2.745121 | 1.750777  | -1.401260 |
| 78 | 1 | 0 | -3.154430 | 1.453854  | -2.369462 |
| 79 | 1 | 0 | -2.232179 | 2.700564  | -1.544005 |
| 80 | 6 | 0 | -3.886044 | 1.960136  | -0.445933 |
| 81 | 6 | 0 | -3.826785 | 2.736003  | 0.649732  |
| 82 | 1 | 0 | -4.748602 | 2.875280  | 1.212943  |
| 83 | 6 | 0 | -5.219653 | 1.362988  | -0.825712 |
| 84 | 1 | 0 | -6.019642 | 1.725439  | -0.174371 |

|    |   |   |           |           |           |
|----|---|---|-----------|-----------|-----------|
| 85 | 1 | 0 | -5.473880 | 1.636865  | -1.854484 |
| 86 | 1 | 0 | -5.199290 | 0.271679  | -0.793102 |
| 87 | 6 | 0 | -2.660415 | 3.504601  | 1.175388  |
| 88 | 1 | 0 | -2.891690 | 4.574810  | 1.218514  |
| 89 | 1 | 0 | -2.408259 | 3.188910  | 2.193295  |
| 90 | 1 | 0 | -1.775025 | 3.387517  | 0.554548  |
| 91 | 8 | 0 | -3.037529 | 0.589015  | 3.085732  |
| 92 | 6 | 0 | -4.002048 | 0.240861  | 2.443628  |
| 93 | 1 | 0 | -3.879424 | -0.351941 | 1.516979  |
| 94 | 6 | 0 | -5.418015 | 0.505502  | 2.852126  |
| 95 | 1 | 0 | -5.985971 | 0.882933  | 1.999452  |
| 96 | 1 | 0 | -5.873211 | -0.448469 | 3.140858  |
| 97 | 1 | 0 | -5.458619 | 1.202674  | 3.688777  |

-----  
**TS2A** (NIMAG=1, 48.9i cm<sup>-1</sup>)  
 -----

| Center<br>Number | Atomic<br>Number | Atomic<br>Type | Coordinates (Angstroms) |           |           |
|------------------|------------------|----------------|-------------------------|-----------|-----------|
|                  |                  |                | X                       | Y         | Z         |
| 1                | 44               | 0              | -1.376517               | 0.216267  | -0.673027 |
| 2                | 53               | 0              | -3.301027               | -1.707341 | -1.164253 |
| 3                | 15               | 0              | 0.349910                | 1.795677  | -0.384759 |
| 4                | 15               | 0              | 0.043083                | -1.629655 | 0.217587  |
| 5                | 8                | 0              | 5.194816                | -0.635828 | -2.837203 |
| 6                | 8                | 0              | 4.614719                | -1.307996 | -0.724336 |
| 7                | 8                | 0              | 4.450818                | 0.863415  | 1.664253  |
| 8                | 8                | 0              | 4.319437                | 0.279157  | 3.880144  |
| 9                | 8                | 0              | -0.604221               | 0.069046  | -3.503722 |
| 10               | 6                | 0              | 0.886326                | 2.237695  | 1.308304  |
| 11               | 6                | 0              | 0.130356                | 1.823653  | 2.399650  |
| 12               | 1                | 0              | -0.783451               | 1.258526  | 2.255862  |
| 13               | 6                | 0              | 0.551030                | 2.119262  | 3.690801  |
| 14               | 1                | 0              | -0.040516               | 1.779748  | 4.532801  |
| 15               | 6                | 0              | 1.722553                | 2.834875  | 3.895791  |
| 16               | 1                | 0              | 2.053885                | 3.058024  | 4.903582  |
| 17               | 6                | 0              | 2.479248                | 3.255503  | 2.806454  |
| 18               | 1                | 0              | 3.397807                | 3.810415  | 2.961374  |
| 19               | 6                | 0              | 2.068553                | 2.951706  | 1.517867  |
| 20               | 1                | 0              | 2.680322                | 3.247456  | 0.672510  |
| 21               | 6                | 0              | 0.110010                | 3.434945  | -1.200598 |
| 22               | 6                | 0              | 0.261997                | 4.639944  | -0.515358 |
| 23               | 1                | 0              | 0.547306                | 4.644078  | 0.528136  |
| 24               | 6                | 0              | 0.025509                | 5.853208  | -1.151578 |
| 25               | 1                | 0              | 0.144591                | 6.776928  | -0.597034 |
| 26               | 6                | 0              | -0.366517               | 5.882986  | -2.481457 |
| 27               | 1                | 0              | -0.551311               | 6.829841  | -2.975781 |
| 28               | 6                | 0              | -0.540001               | 4.688889  | -3.170527 |
| 29               | 1                | 0              | -0.868724               | 4.695038  | -4.203155 |
| 30               | 6                | 0              | -0.317370               | 3.478083  | -2.532620 |
| 31               | 1                | 0              | -0.499023               | 2.561810  | -3.080274 |
| 32               | 6                | 0              | 1.909041                | 1.155032  | -1.141936 |
| 33               | 6                | 0              | 2.297469                | 1.572609  | -2.410134 |



|    |   |   |           |           |           |
|----|---|---|-----------|-----------|-----------|
| 34 | 1 | 0 | 1.749115  | 2.358025  | -2.908349 |
| 35 | 6 | 0 | 3.391397  | 1.022643  | -3.087602 |
| 36 | 1 | 0 | 3.676840  | 1.363963  | -4.073434 |
| 37 | 6 | 0 | 4.081882  | 0.035965  | -2.437908 |
| 38 | 6 | 0 | 5.368443  | -1.668501 | -1.873853 |
| 39 | 1 | 0 | 6.421866  | -1.741240 | -1.606649 |
| 40 | 1 | 0 | 4.980600  | -2.610258 | -2.280371 |
| 41 | 6 | 0 | 3.722391  | -0.374683 | -1.163119 |
| 42 | 6 | 0 | 2.646497  | 0.139723  | -0.476660 |
| 43 | 6 | 0 | 2.436836  | -0.320677 | 0.923281  |
| 44 | 6 | 0 | 3.373598  | 0.053107  | 1.858216  |
| 45 | 6 | 0 | 5.172242  | 0.836575  | 2.887230  |
| 46 | 1 | 0 | 6.060323  | 0.203391  | 2.771451  |
| 47 | 1 | 0 | 5.440317  | 1.854228  | 3.171737  |
| 48 | 6 | 0 | 3.298875  | -0.304078 | 3.194584  |
| 49 | 6 | 0 | 2.292391  | -1.106322 | 3.660654  |
| 50 | 1 | 0 | 2.230134  | -1.395503 | 4.701170  |
| 51 | 6 | 0 | 1.342002  | -1.528409 | 2.724226  |
| 52 | 1 | 0 | 0.549579  | -2.177311 | 3.068320  |
| 53 | 6 | 0 | 1.384907  | -1.148103 | 1.386481  |
| 54 | 6 | 0 | 0.953784  | -2.643226 | -1.016829 |
| 55 | 6 | 0 | 0.396335  | -2.872130 | -2.273860 |
| 56 | 1 | 0 | -0.556772 | -2.431702 | -2.535082 |
| 57 | 6 | 0 | 1.039421  | -3.697033 | -3.188226 |
| 58 | 1 | 0 | 0.595146  | -3.860210 | -4.163026 |
| 59 | 6 | 0 | 2.236719  | -4.314320 | -2.851161 |
| 60 | 1 | 0 | 2.734672  | -4.962424 | -3.563840 |
| 61 | 6 | 0 | 2.786422  | -4.108579 | -1.590748 |
| 62 | 1 | 0 | 3.709469  | -4.603942 | -1.309385 |
| 63 | 6 | 0 | 2.151253  | -3.276756 | -0.679110 |
| 64 | 1 | 0 | 2.592622  | -3.120421 | 0.297647  |
| 65 | 6 | 0 | -0.860890 | -2.916730 | 1.167343  |
| 66 | 6 | 0 | -0.752500 | -4.276864 | 0.893737  |
| 67 | 1 | 0 | -0.107971 | -4.628241 | 0.098031  |
| 68 | 6 | 0 | -1.491085 | -5.197845 | 1.629044  |
| 69 | 1 | 0 | -1.408227 | -6.253895 | 1.398641  |
| 70 | 6 | 0 | -2.333799 | -4.770975 | 2.645081  |
| 71 | 1 | 0 | -2.909885 | -5.492366 | 3.213620  |
| 72 | 6 | 0 | -2.442412 | -3.412902 | 2.923925  |
| 73 | 1 | 0 | -3.101907 | -3.067350 | 3.712406  |
| 74 | 6 | 0 | -1.718340 | -2.492599 | 2.182775  |
| 75 | 1 | 0 | -1.824095 | -1.434293 | 2.390365  |
| 76 | 6 | 0 | -0.880159 | 0.110916  | -2.385350 |
| 77 | 6 | 0 | -2.819406 | 1.730096  | -1.279841 |
| 78 | 1 | 0 | -3.227788 | 1.419607  | -2.244817 |
| 79 | 1 | 0 | -2.297387 | 2.671112  | -1.443276 |
| 80 | 6 | 0 | -3.972401 | 1.991897  | -0.351143 |
| 81 | 6 | 0 | -3.906058 | 2.779898  | 0.733572  |
| 82 | 1 | 0 | -4.831471 | 2.969965  | 1.275419  |
| 83 | 6 | 0 | -5.313684 | 1.435043  | -0.759587 |
| 84 | 1 | 0 | -6.100962 | 1.718243  | -0.054934 |
| 85 | 1 | 0 | -5.591257 | 1.816363  | -1.748092 |
| 86 | 1 | 0 | -5.284311 | 0.346555  | -0.843278 |

|    |   |   |           |           |          |
|----|---|---|-----------|-----------|----------|
| 87 | 6 | 0 | -2.700535 | 3.465542  | 1.285934 |
| 88 | 1 | 0 | -2.869457 | 4.543553  | 1.381818 |
| 89 | 1 | 0 | -2.455878 | 3.084113  | 2.283790 |
| 90 | 1 | 0 | -1.826974 | 3.325512  | 0.652523 |
| 91 | 8 | 0 | -2.792405 | 0.472816  | 2.693869 |
| 92 | 6 | 0 | -3.924335 | 0.247782  | 2.323882 |
| 93 | 1 | 0 | -4.102220 | -0.348341 | 1.411194 |
| 94 | 6 | 0 | -5.144413 | 0.669801  | 3.081042 |
| 95 | 1 | 0 | -5.885496 | 1.079770  | 2.391759 |
| 96 | 1 | 0 | -5.587224 | -0.222839 | 3.537484 |
| 97 | 1 | 0 | -4.892788 | 1.392287  | 3.857275 |

-----  
I (NIMAG=0)

| Center<br>Number | Atomic<br>Number | Atomic<br>Type | Coordinates (Angstroms) |           |           |
|------------------|------------------|----------------|-------------------------|-----------|-----------|
|                  |                  |                | X                       | Y         | Z         |
| 1                | 44               | 0              | -1.424764               | 0.241229  | -0.473166 |
| 2                | 53               | 0              | -3.410525               | -1.703057 | -0.964402 |
| 3                | 15               | 0              | 0.333184                | 1.803433  | -0.338913 |
| 4                | 15               | 0              | -0.022166               | -1.598060 | 0.335571  |
| 5                | 8                | 0              | 4.664020                | -0.924493 | -3.361530 |
| 6                | 8                | 0              | 4.316454                | -1.542895 | -1.184424 |
| 7                | 8                | 0              | 4.614063                | 0.733435  | 1.156906  |
| 8                | 8                | 0              | 4.769697                | 0.179039  | 3.382177  |
| 9                | 8                | 0              | -0.876742               | 0.061811  | -3.387372 |
| 10               | 6                | 0              | 1.133994                | 2.274512  | 1.247415  |
| 11               | 6                | 0              | 0.572313                | 1.917433  | 2.470052  |
| 12               | 1                | 0              | -0.361933               | 1.371151  | 2.488323  |
| 13               | 6                | 0              | 1.223234                | 2.238091  | 3.655935  |
| 14               | 1                | 0              | 0.789440                | 1.938168  | 4.603117  |
| 15               | 6                | 0              | 2.428343                | 2.926406  | 3.630239  |
| 16               | 1                | 0              | 2.937145                | 3.167881  | 4.556509  |
| 17               | 6                | 0              | 2.986601                | 3.296943  | 2.411362  |
| 18               | 1                | 0              | 3.927776                | 3.834746  | 2.382233  |
| 19               | 6                | 0              | 2.348498                | 2.964939  | 1.226371  |
| 20               | 1                | 0              | 2.805953                | 3.224850  | 0.278023  |
| 21               | 6                | 0              | 0.020639                | 3.446927  | -1.119227 |
| 22               | 6                | 0              | 0.187540                | 4.641936  | -0.420386 |
| 23               | 1                | 0              | 0.545823                | 4.633099  | 0.600342  |
| 24               | 6                | 0              | -0.122246               | 5.861248  | -1.012811 |
| 25               | 1                | 0              | 0.011819                | 6.776808  | -0.448055 |
| 26               | 6                | 0              | -0.603917               | 5.906940  | -2.312481 |
| 27               | 1                | 0              | -0.844495               | 6.858136  | -2.773410 |
| 28               | 6                | 0              | -0.795074               | 4.722036  | -3.012954 |
| 29               | 1                | 0              | -1.195370               | 4.739568  | -4.019874 |
| 30               | 6                | 0              | -0.500369               | 3.505250  | -2.417196 |
| 31               | 1                | 0              | -0.706765               | 2.594624  | -2.965796 |
| 32               | 6                | 0              | 1.773165                | 1.119258  | -1.275597 |
| 33               | 6                | 0              | 2.037592                | 1.518135  | -2.579982 |
| 34               | 1                | 0              | 1.492718                | 2.345475  | -3.009451 |
| 35               | 6                | 0              | 2.993270                | 0.887651  | -3.386464 |

|    |   |   |           |           |           |
|----|---|---|-----------|-----------|-----------|
| 36 | 1 | 0 | 3.181623  | 1.213540  | -4.400493 |
| 37 | 6 | 0 | 3.671202  | -0.161883 | -2.828865 |
| 38 | 6 | 0 | 4.856324  | -1.978327 | -2.424207 |
| 39 | 1 | 0 | 5.922081  | -2.168486 | -2.307353 |
| 40 | 1 | 0 | 4.311397  | -2.868817 | -2.761523 |
| 41 | 6 | 0 | 3.447187  | -0.546101 | -1.514350 |
| 42 | 6 | 0 | 2.514461  | 0.052965  | -0.701083 |
| 43 | 6 | 0 | 2.470241  | -0.370351 | 0.725054  |
| 44 | 6 | 0 | 3.540293  | -0.022019 | 1.515553  |
| 45 | 6 | 0 | 5.480639  | 0.737168  | 2.282047  |
| 46 | 1 | 0 | 6.360131  | 0.120069  | 2.065517  |
| 47 | 1 | 0 | 5.761356  | 1.764429  | 2.519087  |
| 48 | 6 | 0 | 3.640254  | -0.363706 | 2.853872  |
| 49 | 6 | 0 | 2.684141  | -1.130943 | 3.462834  |
| 50 | 1 | 0 | 2.763533  | -1.420371 | 4.502225  |
| 51 | 6 | 0 | 1.596210  | -1.522367 | 2.673318  |
| 52 | 1 | 0 | 0.848637  | -2.153862 | 3.129838  |
| 53 | 6 | 0 | 1.458766  | -1.146105 | 1.340944  |
| 54 | 6 | 0 | 0.736293  | -2.742996 | -0.889946 |
| 55 | 6 | 0 | 0.150948  | -2.928663 | -2.140946 |
| 56 | 1 | 0 | -0.753016 | -2.396389 | -2.402739 |
| 57 | 6 | 0 | 0.700479  | -3.826759 | -3.047835 |
| 58 | 1 | 0 | 0.234271  | -3.956785 | -4.017385 |
| 59 | 6 | 0 | 1.831713  | -4.557547 | -2.709564 |
| 60 | 1 | 0 | 2.255897  | -5.262574 | -3.416191 |
| 61 | 6 | 0 | 2.411916  | -4.389192 | -1.456936 |
| 62 | 1 | 0 | 3.290230  | -4.961835 | -1.179706 |
| 63 | 6 | 0 | 1.870479  | -3.485641 | -0.553929 |
| 64 | 1 | 0 | 2.337594  | -3.354815 | 0.414760  |
| 65 | 6 | 0 | -0.926870 | -2.757405 | 1.444074  |
| 66 | 6 | 0 | -1.155297 | -4.082279 | 1.081255  |
| 67 | 1 | 0 | -0.756399 | -4.469605 | 0.152475  |
| 68 | 6 | 0 | -1.918417 | -4.914067 | 1.892328  |
| 69 | 1 | 0 | -2.096037 | -5.938744 | 1.586968  |
| 70 | 6 | 0 | -2.459468 | -4.436724 | 3.076554  |
| 71 | 1 | 0 | -3.057420 | -5.086722 | 3.705115  |
| 72 | 6 | 0 | -2.232105 | -3.117112 | 3.450561  |
| 73 | 1 | 0 | -2.643543 | -2.735758 | 4.379077  |
| 74 | 6 | 0 | -1.478822 | -2.283773 | 2.637756  |
| 75 | 1 | 0 | -1.312049 | -1.256727 | 2.935842  |
| 76 | 6 | 0 | -1.051022 | 0.105078  | -2.250174 |
| 77 | 6 | 0 | -2.909026 | 1.801829  | -1.039149 |
| 78 | 1 | 0 | -3.299742 | 1.496923  | -2.012648 |
| 79 | 1 | 0 | -2.353548 | 2.726651  | -1.175456 |
| 80 | 6 | 0 | -4.053115 | 2.084830  | -0.132784 |
| 81 | 6 | 0 | -3.949504 | 2.873377  | 0.957489  |
| 82 | 1 | 0 | -4.853591 | 3.087613  | 1.523859  |
| 83 | 6 | 0 | -5.400132 | 1.527001  | -0.511510 |
| 84 | 1 | 0 | -6.159134 | 1.743922  | 0.245294  |
| 85 | 1 | 0 | -5.726487 | 1.968379  | -1.459173 |
| 86 | 1 | 0 | -5.349844 | 0.447796  | -0.672674 |
| 87 | 6 | 0 | -2.698824 | 3.582467  | 1.378830  |
| 88 | 1 | 0 | -2.467777 | 4.419265  | 0.709156  |

|    |   |   |           |           |          |
|----|---|---|-----------|-----------|----------|
| 89 | 1 | 0 | -2.783330 | 3.982472  | 2.392602 |
| 90 | 1 | 0 | -1.833886 | 2.913547  | 1.351666 |
| 91 | 8 | 0 | -2.100932 | 0.525540  | 1.598710 |
| 92 | 6 | 0 | -3.265120 | 0.443183  | 1.980969 |
| 93 | 1 | 0 | -4.021311 | -0.011491 | 1.334393 |
| 94 | 6 | 0 | -3.634271 | 0.755090  | 3.390823 |
| 95 | 1 | 0 | -4.631838 | 1.192898  | 3.437906 |
| 96 | 1 | 0 | -3.658350 | -0.191969 | 3.943880 |
| 97 | 1 | 0 | -2.900654 | 1.420401  | 3.847178 |

-----

**TS2B** (NIMAG=1, 276.4i cm<sup>-1</sup>)

-----

| Center<br>Number | Atomic<br>Number | Atomic<br>Type | Coordinates (Angstroms) |           |           |
|------------------|------------------|----------------|-------------------------|-----------|-----------|
|                  |                  |                | X                       | Y         | Z         |
| 1                | 44               | 0              | -1.417629               | 0.248613  | -0.479455 |
| 2                | 53               | 0              | -3.461869               | -1.655346 | -0.906485 |
| 3                | 15               | 0              | 0.380140                | 1.768161  | -0.386021 |
| 4                | 15               | 0              | -0.076482               | -1.592221 | 0.317846  |
| 5                | 8                | 0              | 4.790939                | -1.006761 | -3.246625 |
| 6                | 8                | 0              | 4.370582                | -1.599697 | -1.074397 |
| 7                | 8                | 0              | 4.596070                | 0.648472  | 1.243607  |
| 8                | 8                | 0              | 4.641525                | 0.155543  | 3.491293  |
| 9                | 8                | 0              | -0.882108               | -0.030091 | -3.395838 |
| 10               | 6                | 0              | 1.175833                | 2.285956  | 1.187750  |
| 11               | 6                | 0              | 0.606919                | 1.971292  | 2.419063  |
| 12               | 1                | 0              | -0.329436               | 1.426795  | 2.447621  |
| 13               | 6                | 0              | 1.252717                | 2.336858  | 3.594984  |
| 14               | 1                | 0              | 0.814105                | 2.071043  | 4.550084  |
| 15               | 6                | 0              | 2.456476                | 3.026537  | 3.550307  |
| 16               | 1                | 0              | 2.958709                | 3.304939  | 4.469928  |
| 17               | 6                | 0              | 3.021264                | 3.352994  | 2.321315  |
| 18               | 1                | 0              | 3.960103                | 3.894133  | 2.277281  |
| 19               | 6                | 0              | 2.390449                | 2.975791  | 1.146005  |
| 20               | 1                | 0              | 2.850929                | 3.204020  | 0.190898  |
| 21               | 6                | 0              | 0.074247                | 3.389132  | -1.215551 |
| 22               | 6                | 0              | 0.203716                | 4.599284  | -0.535108 |
| 23               | 1                | 0              | 0.540808                | 4.614394  | 0.492916  |
| 24               | 6                | 0              | -0.115074               | 5.801706  | -1.157237 |
| 25               | 1                | 0              | -0.010614               | 6.729800  | -0.606888 |
| 26               | 6                | 0              | -0.566472               | 5.814745  | -2.468288 |
| 27               | 1                | 0              | -0.812841               | 6.752800  | -2.952491 |
| 28               | 6                | 0              | -0.720018               | 4.613639  | -3.150950 |
| 29               | 1                | 0              | -1.096362               | 4.605850  | -4.167237 |
| 30               | 6                | 0              | -0.418048               | 3.413806  | -2.525978 |
| 31               | 1                | 0              | -0.599996               | 2.489356  | -3.059907 |
| 32               | 6                | 0              | 1.820081                | 1.047933  | -1.291446 |
| 33               | 6                | 0              | 2.121197                | 1.425606  | -2.594053 |
| 34               | 1                | 0              | 1.588925                | 2.245043  | -3.053278 |
| 35               | 6                | 0              | 3.105761                | 0.787060  | -3.358115 |
| 36               | 1                | 0              | 3.325468                | 1.096270  | -4.371066 |
| 37               | 6                | 0              | 3.774415                | -0.245514 | -2.759047 |

|    |   |   |           |           |           |
|----|---|---|-----------|-----------|-----------|
| 38 | 6 | 0 | 4.967281  | -2.041558 | -2.285732 |
| 39 | 1 | 0 | 6.031259  | -2.208299 | -2.124287 |
| 40 | 1 | 0 | 4.454670  | -2.947846 | -2.631093 |
| 41 | 6 | 0 | 3.508765  | -0.611726 | -1.447351 |
| 42 | 6 | 0 | 2.544368  | -0.006962 | -0.675981 |
| 43 | 6 | 0 | 2.440106  | -0.404607 | 0.754178  |
| 44 | 6 | 0 | 3.484472  | -0.059892 | 1.579996  |
| 45 | 6 | 0 | 5.379538  | 0.744530  | 2.424858  |
| 46 | 1 | 0 | 6.316494  | 0.196385  | 2.284591  |
| 47 | 1 | 0 | 5.562307  | 1.797158  | 2.652829  |
| 48 | 6 | 0 | 3.516596  | -0.361704 | 2.931198  |
| 49 | 6 | 0 | 2.510524  | -1.076562 | 3.522986  |
| 50 | 1 | 0 | 2.534300  | -1.328572 | 4.574760  |
| 51 | 6 | 0 | 1.446481  | -1.463966 | 2.699752  |
| 52 | 1 | 0 | 0.654250  | -2.048391 | 3.144234  |
| 53 | 6 | 0 | 1.382624  | -1.135461 | 1.349813  |
| 54 | 6 | 0 | 0.688251  | -2.731582 | -0.907099 |
| 55 | 6 | 0 | 0.059160  | -2.975936 | -2.126789 |
| 56 | 1 | 0 | -0.872621 | -2.481764 | -2.366716 |
| 57 | 6 | 0 | 0.600134  | -3.885675 | -3.026629 |
| 58 | 1 | 0 | 0.100304  | -4.060666 | -3.972051 |
| 59 | 6 | 0 | 1.765653  | -4.571966 | -2.711829 |
| 60 | 1 | 0 | 2.183430  | -5.285991 | -3.413110 |
| 61 | 6 | 0 | 2.386586  | -4.349134 | -1.488030 |
| 62 | 1 | 0 | 3.288273  | -4.891512 | -1.225053 |
| 63 | 6 | 0 | 1.853381  | -3.433653 | -0.591657 |
| 64 | 1 | 0 | 2.351398  | -3.264157 | 0.355125  |
| 65 | 6 | 0 | -0.987168 | -2.761076 | 1.410605  |
| 66 | 6 | 0 | -1.055435 | -4.124728 | 1.138893  |
| 67 | 1 | 0 | -0.550921 | -4.537927 | 0.275062  |
| 68 | 6 | 0 | -1.795471 | -4.967861 | 1.960268  |
| 69 | 1 | 0 | -1.850326 | -6.025123 | 1.727437  |
| 70 | 6 | 0 | -2.468011 | -4.461460 | 3.062278  |
| 71 | 1 | 0 | -3.048924 | -5.120801 | 3.697224  |
| 72 | 6 | 0 | -2.399174 | -3.101382 | 3.342878  |
| 73 | 1 | 0 | -2.924700 | -2.694899 | 4.200160  |
| 74 | 6 | 0 | -1.670769 | -2.257567 | 2.519667  |
| 75 | 1 | 0 | -1.634300 | -1.196251 | 2.725940  |
| 76 | 6 | 0 | -1.052750 | 0.043413  | -2.259896 |
| 77 | 6 | 0 | -2.885576 | 1.900801  | -1.075407 |
| 78 | 1 | 0 | -3.229243 | 1.629562  | -2.073573 |
| 79 | 1 | 0 | -2.273537 | 2.796027  | -1.108190 |
| 80 | 6 | 0 | -3.988199 | 2.066738  | -0.158016 |
| 81 | 6 | 0 | -3.848684 | 2.683336  | 1.067542  |
| 82 | 1 | 0 | -4.762684 | 2.858478  | 1.630138  |
| 83 | 6 | 0 | -5.339418 | 1.535532  | -0.540069 |
| 84 | 1 | 0 | -6.004361 | 1.440167  | 0.322276  |
| 85 | 1 | 0 | -5.797311 | 2.240932  | -1.242554 |
| 86 | 1 | 0 | -5.259904 | 0.571902  | -1.043288 |
| 87 | 6 | 0 | -2.668487 | 3.542295  | 1.416521  |
| 88 | 1 | 0 | -2.601822 | 4.411923  | 0.753644  |
| 89 | 1 | 0 | -2.729194 | 3.906880  | 2.444646  |
| 90 | 1 | 0 | -1.735717 | 2.983855  | 1.310928  |

|    |   |   |           |          |          |
|----|---|---|-----------|----------|----------|
| 91 | 8 | 0 | -2.039850 | 0.670206 | 1.542305 |
| 92 | 6 | 0 | -3.245405 | 0.763408 | 1.911485 |
| 93 | 1 | 0 | -4.002531 | 0.168361 | 1.394514 |
| 94 | 6 | 0 | -3.512131 | 1.046167 | 3.365389 |
| 95 | 1 | 0 | -4.549590 | 1.335336 | 3.536787 |
| 96 | 1 | 0 | -3.319842 | 0.123061 | 3.925153 |
| 97 | 1 | 0 | -2.840561 | 1.820130 | 3.741354 |

-----

J (NIMAG=0)

-----

| Center<br>Number | Atomic<br>Number | Atomic<br>Type | Coordinates (Angstroms) |           |           |
|------------------|------------------|----------------|-------------------------|-----------|-----------|
|                  |                  |                | X                       | Y         | Z         |
| 1                | 44               | 0              | -1.412948               | 0.321632  | -0.463965 |
| 2                | 53               | 0              | -3.601798               | -1.418827 | -0.875742 |
| 3                | 15               | 0              | 0.522040                | 1.702847  | -0.441817 |
| 4                | 15               | 0              | -0.227658               | -1.554960 | 0.278128  |
| 5                | 8                | 0              | 4.906923                | -1.321047 | -3.081663 |
| 6                | 8                | 0              | 4.363124                | -1.860472 | -0.920728 |
| 7                | 8                | 0              | 4.585506                | 0.321333  | 1.373029  |
| 8                | 8                | 0              | 4.442324                | -0.059622 | 3.638427  |
| 9                | 8                | 0              | -0.970375               | -0.064064 | -3.406135 |
| 10               | 6                | 0              | 1.338412                | 2.259265  | 1.103519  |
| 11               | 6                | 0              | 0.730997                | 2.053934  | 2.339660  |
| 12               | 1                | 0              | -0.235544               | 1.554716  | 2.369912  |
| 13               | 6                | 0              | 1.380152                | 2.464992  | 3.499560  |
| 14               | 1                | 0              | 0.912823                | 2.288508  | 4.461854  |
| 15               | 6                | 0              | 2.619489                | 3.085744  | 3.431358  |
| 16               | 1                | 0              | 3.120618                | 3.401941  | 4.339611  |
| 17               | 6                | 0              | 3.222397                | 3.297701  | 2.194035  |
| 18               | 1                | 0              | 4.188846                | 3.786256  | 2.132831  |
| 19               | 6                | 0              | 2.590484                | 2.877327  | 1.034461  |
| 20               | 1                | 0              | 3.074578                | 3.020305  | 0.074274  |
| 21               | 6                | 0              | 0.300015                | 3.293158  | -1.354999 |
| 22               | 6                | 0              | 0.452091                | 4.523013  | -0.714669 |
| 23               | 1                | 0              | 0.771682                | 4.564750  | 0.318237  |
| 24               | 6                | 0              | 0.177939                | 5.710733  | -1.384839 |
| 25               | 1                | 0              | 0.297198                | 6.654318  | -0.864895 |
| 26               | 6                | 0              | -0.248253               | 5.689614  | -2.703854 |
| 27               | 1                | 0              | -0.460615               | 6.616110  | -3.224868 |
| 28               | 6                | 0              | -0.417983               | 4.469508  | -3.348720 |
| 29               | 1                | 0              | -0.769874               | 4.436771  | -4.373319 |
| 30               | 6                | 0              | -0.160073               | 3.284784  | -2.677675 |
| 31               | 1                | 0              | -0.350361               | 2.348629  | -3.186998 |
| 32               | 6                | 0              | 1.918477                | 0.866023  | -1.310966 |
| 33               | 6                | 0              | 2.284474                | 1.200750  | -2.608644 |
| 34               | 1                | 0              | 1.805731                | 2.029909  | -3.107240 |
| 35               | 6                | 0              | 3.279812                | 0.511934  | -3.312037 |
| 36               | 1                | 0              | 3.554319                | 0.787724  | -4.321263 |
| 37               | 6                | 0              | 3.892934                | -0.520991 | -2.656334 |
| 38               | 6                | 0              | 5.027017                | -2.330561 | -2.086435 |
| 39               | 1                | 0              | 6.080072                | -2.493968 | -1.860769 |

|    |   |   |           |           |           |
|----|---|---|-----------|-----------|-----------|
| 40 | 1 | 0 | 4.535544  | -3.245137 | -2.439144 |
| 41 | 6 | 0 | 3.557531  | -0.849360 | -1.351130 |
| 42 | 6 | 0 | 2.577427  | -0.197023 | -0.640352 |
| 43 | 6 | 0 | 2.370086  | -0.545413 | 0.789594  |
| 44 | 6 | 0 | 3.388824  | -0.254565 | 1.666784  |
| 45 | 6 | 0 | 5.259961  | 0.494931  | 2.611889  |
| 46 | 1 | 0 | 6.214390  | -0.036485 | 2.582185  |
| 47 | 1 | 0 | 5.399635  | 1.562947  | 2.801189  |
| 48 | 6 | 0 | 3.304785  | -0.483530 | 3.030233  |
| 49 | 6 | 0 | 2.193529  | -1.055891 | 3.588372  |
| 50 | 1 | 0 | 2.121365  | -1.239456 | 4.651899  |
| 51 | 6 | 0 | 1.151726  | -1.388179 | 2.715554  |
| 52 | 1 | 0 | 0.271526  | -1.853493 | 3.134461  |
| 53 | 6 | 0 | 1.213013  | -1.145042 | 1.347839  |
| 54 | 6 | 0 | 0.492366  | -2.706151 | -0.958372 |
| 55 | 6 | 0 | -0.198956 | -2.986239 | -2.136134 |
| 56 | 1 | 0 | -1.140685 | -2.495983 | -2.345253 |
| 57 | 6 | 0 | 0.290269  | -3.930557 | -3.029441 |
| 58 | 1 | 0 | -0.256951 | -4.132579 | -3.942631 |
| 59 | 6 | 0 | 1.462517  | -4.619500 | -2.747483 |
| 60 | 1 | 0 | 1.838988  | -5.361277 | -3.443124 |
| 61 | 6 | 0 | 2.140749  | -4.366025 | -1.561111 |
| 62 | 1 | 0 | 3.042332  | -4.917274 | -1.317065 |
| 63 | 6 | 0 | 1.660363  | -3.415176 | -0.671632 |
| 64 | 1 | 0 | 2.200347  | -3.229027 | 0.248273  |
| 65 | 6 | 0 | -1.194986 | -2.705504 | 1.340654  |
| 66 | 6 | 0 | -1.124091 | -4.086959 | 1.180052  |
| 67 | 1 | 0 | -0.512982 | -4.524680 | 0.401692  |
| 68 | 6 | 0 | -1.862883 | -4.923217 | 2.009857  |
| 69 | 1 | 0 | -1.810274 | -5.996606 | 1.867443  |
| 70 | 6 | 0 | -2.668596 | -4.390248 | 3.005410  |
| 71 | 1 | 0 | -3.247194 | -5.046207 | 3.646278  |
| 72 | 6 | 0 | -2.738736 | -3.011194 | 3.169146  |
| 73 | 1 | 0 | -3.375428 | -2.583490 | 3.935658  |
| 74 | 6 | 0 | -2.012763 | -2.173452 | 2.338237  |
| 75 | 1 | 0 | -2.068732 | -1.095800 | 2.429740  |
| 76 | 6 | 0 | -1.112864 | 0.042876  | -2.270243 |
| 77 | 6 | 0 | -2.820195 | 2.384843  | -1.116184 |
| 78 | 1 | 0 | -3.048761 | 2.199762  | -2.160312 |
| 79 | 1 | 0 | -1.981905 | 3.026838  | -0.904408 |
| 80 | 6 | 0 | -3.766437 | 2.183926  | -0.168920 |
| 81 | 6 | 0 | -3.534268 | 2.483753  | 1.280008  |
| 82 | 1 | 0 | -4.506222 | 2.745023  | 1.715990  |
| 83 | 6 | 0 | -5.135052 | 1.692446  | -0.518118 |
| 84 | 1 | 0 | -5.483990 | 0.934192  | 0.186353  |
| 85 | 1 | 0 | -5.816725 | 2.549326  | -0.448002 |
| 86 | 1 | 0 | -5.183964 | 1.280189  | -1.524462 |
| 87 | 6 | 0 | -2.544557 | 3.616251  | 1.539510  |
| 88 | 1 | 0 | -2.797400 | 4.504384  | 0.954671  |
| 89 | 1 | 0 | -2.544742 | 3.895943  | 2.595118  |
| 90 | 1 | 0 | -1.528845 | 3.311754  | 1.282616  |
| 91 | 8 | 0 | -1.828304 | 0.769040  | 1.540673  |
| 92 | 6 | 0 | -3.083347 | 1.142411  | 1.971550  |

|    |   |   |           |          |          |
|----|---|---|-----------|----------|----------|
| 93 | 1 | 0 | -3.843765 | 0.387244 | 1.705792 |
| 94 | 6 | 0 | -3.083453 | 1.284129 | 3.494494 |
| 95 | 1 | 0 | -4.051338 | 1.635148 | 3.865840 |
| 96 | 1 | 0 | -2.872538 | 0.316651 | 3.957248 |
| 97 | 1 | 0 | -2.307555 | 1.982873 | 3.818993 |

---



Cartesian coordinates of stationary points at the  $\omega$ B97X-D/(SDD, 6-311G(d,p)) level of theory are given below:

**K'** (NIMAG=0)

| Center<br>Number | Atomic<br>Number | Atomic<br>Type | Coordinates (Angstroms) |           |           |
|------------------|------------------|----------------|-------------------------|-----------|-----------|
|                  |                  |                | X                       | Y         | Z         |
| 1                | 44               | 0              | 0.007100                | -2.116204 | 0.091850  |
| 2                | 17               | 0              | -1.897830               | -3.688466 | 0.452826  |
| 3                | 15               | 0              | 1.740659                | -0.584726 | -0.008299 |
| 4                | 15               | 0              | -1.694278               | -0.466872 | -0.213115 |
| 5                | 8                | 0              | 0.353495                | 3.703681  | 3.845333  |
| 6                | 8                | 0              | -0.692389               | 3.703523  | 1.808008  |
| 7                | 8                | 0              | 1.141413                | 3.942055  | -0.841499 |
| 8                | 8                | 0              | 0.311745                | 4.424955  | -2.933675 |
| 9                | 8                | 0              | 0.153146                | -2.009453 | 3.105069  |
| 10               | 6                | 0              | 1.464472                | 0.787325  | 1.185090  |
| 11               | 6                | 0              | 2.118597                | 0.826279  | 2.409512  |
| 12               | 1                | 0              | 2.897317                | 0.108695  | 2.625021  |
| 13               | 6                | 0              | 1.812187                | 1.772026  | 3.395524  |
| 14               | 1                | 0              | 2.331578                | 1.792282  | 4.344066  |
| 15               | 6                | 0              | 0.822109                | 2.668555  | 3.097623  |
| 16               | 6                | 0              | -0.793146               | 4.172220  | 3.145949  |
| 17               | 1                | 0              | -0.799358               | 5.261100  | 3.147737  |
| 18               | 1                | 0              | -1.695040               | 3.753558  | 3.608978  |
| 19               | 6                | 0              | 0.181675                | 2.658901  | 1.865936  |
| 20               | 6                | 0              | 0.458980                | 1.742496  | 0.878700  |
| 21               | 6                | 0              | -0.185057               | 1.920144  | -0.454137 |
| 22               | 6                | 0              | 0.205881                | 3.016978  | -1.187948 |
| 23               | 6                | 0              | 1.230340                | 4.849595  | -1.931452 |
| 24               | 1                | 0              | 0.959023                | 5.852730  | -1.591212 |
| 25               | 1                | 0              | 2.244466                | 4.825891  | -2.339495 |
| 26               | 6                | 0              | -0.295562               | 3.311627  | -2.445045 |
| 27               | 6                | 0              | -1.258998               | 2.532497  | -3.026464 |
| 28               | 1                | 0              | -1.663611               | 2.762113  | -4.003154 |
| 29               | 6                | 0              | -1.690364               | 1.418844  | -2.295929 |
| 30               | 1                | 0              | -2.455911               | 0.792619  | -2.732811 |
| 31               | 6                | 0              | -1.174937               | 1.093415  | -1.045341 |
| 32               | 6                | 0              | 0.077421                | -1.993753 | 1.961809  |
| 33               | 6                | 0              | 0.101291                | -3.116688 | -1.980263 |
| 34               | 1                | 0              | 0.203925                | -2.608719 | -2.932975 |
| 35               | 1                | 0              | -0.747158               | -3.784915 | -1.887329 |
| 36               | 6                | 0              | 1.267386                | -3.374637 | -1.245068 |
| 37               | 6                | 0              | 1.229770                | -3.973066 | 0.030330  |
| 38               | 1                | 0              | 2.198328                | -2.915858 | -1.573532 |
| 39               | 1                | 0              | 2.159666                | -4.038448 | 0.583606  |
| 40               | 1                | 0              | 0.488899                | -4.732356 | 0.249829  |
| 41               | 6                | 0              | 2.152130                | 0.355736  | -1.531766 |
| 42               | 6                | 0              | 3.083812                | 1.395418  | -1.474152 |
| 43               | 6                | 0              | 1.511357                | 0.081066  | -2.734292 |
| 44               | 6                | 0              | 3.376330                | 2.135502  | -2.609325 |

|    |   |   |           |           |           |
|----|---|---|-----------|-----------|-----------|
| 45 | 1 | 0 | 3.568465  | 1.635641  | -0.534046 |
| 46 | 6 | 0 | 1.794608  | 0.832480  | -3.868659 |
| 47 | 1 | 0 | 0.755667  | -0.691966 | -2.765751 |
| 48 | 6 | 0 | 2.727726  | 1.858293  | -3.809004 |
| 49 | 1 | 0 | 4.105751  | 2.936223  | -2.555421 |
| 50 | 1 | 0 | 1.272753  | 0.623851  | -4.795244 |
| 51 | 1 | 0 | 2.943891  | 2.447999  | -4.692551 |
| 52 | 6 | 0 | 3.368753  | -1.328040 | 0.446516  |
| 53 | 6 | 0 | 3.482289  | -2.045196 | 1.643084  |
| 54 | 6 | 0 | 4.464794  | -1.302879 | -0.416544 |
| 55 | 6 | 0 | 4.669017  | -2.675765 | 1.985526  |
| 56 | 1 | 0 | 2.635183  | -2.130265 | 2.311658  |
| 57 | 6 | 0 | 5.648624  | -1.950960 | -0.080367 |
| 58 | 1 | 0 | 4.402942  | -0.784225 | -1.364442 |
| 59 | 6 | 0 | 5.758582  | -2.630088 | 1.123635  |
| 60 | 1 | 0 | 4.734326  | -3.218414 | 2.921454  |
| 61 | 1 | 0 | 6.485309  | -1.922848 | -0.768987 |
| 62 | 1 | 0 | 6.682675  | -3.132516 | 1.385426  |
| 63 | 6 | 0 | -2.506435 | 0.152361  | 1.318564  |
| 64 | 6 | 0 | -2.896454 | 1.483977  | 1.459991  |
| 65 | 6 | 0 | -2.828083 | -0.761617 | 2.323364  |
| 66 | 6 | 0 | -3.574946 | 1.899441  | 2.599133  |
| 67 | 1 | 0 | -2.672861 | 2.205571  | 0.684169  |
| 68 | 6 | 0 | -3.503026 | -0.341785 | 3.461613  |
| 69 | 1 | 0 | -2.576079 | -1.809062 | 2.200277  |
| 70 | 6 | 0 | -3.874265 | 0.989565  | 3.605458  |
| 71 | 1 | 0 | -3.882349 | 2.935834  | 2.689828  |
| 72 | 1 | 0 | -3.743673 | -1.062444 | 4.234449  |
| 73 | 1 | 0 | -4.404462 | 1.314132  | 4.494011  |
| 74 | 6 | 0 | -3.155625 | -0.974699 | -1.210973 |
| 75 | 6 | 0 | -2.961758 | -1.735812 | -2.362781 |
| 76 | 6 | 0 | -4.450503 | -0.588747 | -0.868847 |
| 77 | 6 | 0 | -4.034981 | -2.092689 | -3.165276 |
| 78 | 1 | 0 | -1.963434 | -2.054769 | -2.624995 |
| 79 | 6 | 0 | -5.527221 | -0.954745 | -1.668035 |
| 80 | 1 | 0 | -4.630705 | -0.008955 | 0.027450  |
| 81 | 6 | 0 | -5.323334 | -1.703987 | -2.818201 |
| 82 | 1 | 0 | -3.865603 | -2.689521 | -4.054236 |
| 83 | 1 | 0 | -6.529501 | -0.655184 | -1.383477 |
| 84 | 1 | 0 | -6.165318 | -1.992532 | -3.437322 |

-----

**L' (NIMAG=0)**

| Center<br>Number | Atomic<br>Number | Atomic<br>Type | Coordinates (Angstroms) |           |           |
|------------------|------------------|----------------|-------------------------|-----------|-----------|
|                  |                  |                | X                       | Y         | Z         |
| 1                | 44               | 0              | 0.042069                | -2.155592 | 0.090797  |
| 2                | 17               | 0              | -1.856307               | -3.715154 | 0.527680  |
| 3                | 15               | 0              | 1.757122                | -0.573450 | -0.051378 |
| 4                | 15               | 0              | -1.672954               | -0.506658 | -0.208809 |
| 5                | 8                | 0              | 0.317597                | 3.629192  | 3.892671  |

|    |   |   |           |           |           |
|----|---|---|-----------|-----------|-----------|
| 6  | 8 | 0 | -0.746506 | 3.643590  | 1.865280  |
| 7  | 8 | 0 | 1.005803  | 4.002728  | -0.775251 |
| 8  | 8 | 0 | 0.120475  | 4.513722  | -2.837008 |
| 9  | 8 | 0 | 0.254548  | -2.008339 | 3.091750  |
| 10 | 6 | 0 | 1.457724  | 0.777658  | 1.169472  |
| 11 | 6 | 0 | 2.123998  | 0.813169  | 2.387633  |
| 12 | 1 | 0 | 2.921103  | 0.111551  | 2.584718  |
| 13 | 6 | 0 | 1.810944  | 1.736027  | 3.392970  |
| 14 | 1 | 0 | 2.341843  | 1.750185  | 4.335224  |
| 15 | 6 | 0 | 0.799686  | 2.616963  | 3.122552  |
| 16 | 6 | 0 | -0.845917 | 4.084482  | 3.212485  |
| 17 | 1 | 0 | -0.876753 | 5.172685  | 3.235019  |
| 18 | 1 | 0 | -1.733905 | 3.636300  | 3.675004  |
| 19 | 6 | 0 | 0.148111  | 2.615264  | 1.897084  |
| 20 | 6 | 0 | 0.432714  | 1.721923  | 0.890524  |
| 21 | 6 | 0 | -0.232566 | 1.917244  | -0.428877 |
| 22 | 6 | 0 | 0.106770  | 3.047852  | -1.136679 |
| 23 | 6 | 0 | 1.083803  | 4.910733  | -1.865285 |
| 24 | 1 | 0 | 0.850737  | 5.918708  | -1.514629 |
| 25 | 1 | 0 | 2.083455  | 4.860192  | -2.307437 |
| 26 | 6 | 0 | -0.427405 | 3.358399  | -2.376695 |
| 27 | 6 | 0 | -1.362925 | 2.554860  | -2.970967 |
| 28 | 1 | 0 | -1.786411 | 2.793937  | -3.937360 |
| 29 | 6 | 0 | -1.738913 | 1.404074  | -2.267900 |
| 30 | 1 | 0 | -2.477784 | 0.753442  | -2.715744 |
| 31 | 6 | 0 | -1.199987 | 1.071807  | -1.029211 |
| 32 | 6 | 0 | 0.131135  | -2.020415 | 1.952601  |
| 33 | 6 | 0 | 1.434060  | -3.887624 | 0.006511  |
| 34 | 1 | 0 | 1.266218  | -4.670318 | 0.738641  |
| 35 | 1 | 0 | 2.454975  | -3.533338 | -0.061352 |
| 36 | 6 | 0 | 0.627723  | -3.906058 | -1.154402 |
| 37 | 6 | 0 | 0.652755  | -2.868435 | -2.083702 |
| 38 | 1 | 0 | -0.199942 | -4.604445 | -1.192223 |
| 39 | 1 | 0 | 1.587491  | -2.354637 | -2.276889 |
| 40 | 1 | 0 | -0.035054 | -2.893303 | -2.921738 |
| 41 | 6 | 0 | 2.110313  | 0.433829  | -1.556064 |
| 42 | 6 | 0 | 3.056245  | 1.458968  | -1.462268 |
| 43 | 6 | 0 | 1.425345  | 0.254830  | -2.753723 |
| 44 | 6 | 0 | 3.328615  | 2.268145  | -2.554450 |
| 45 | 1 | 0 | 3.572867  | 1.632920  | -0.524722 |
| 46 | 6 | 0 | 1.689857  | 1.074377  | -3.844367 |
| 47 | 1 | 0 | 0.650339  | -0.495999 | -2.820957 |
| 48 | 6 | 0 | 2.644239  | 2.077502  | -3.750526 |
| 49 | 1 | 0 | 4.071076  | 3.053833  | -2.468022 |
| 50 | 1 | 0 | 1.133749  | 0.935578  | -4.764019 |
| 51 | 1 | 0 | 2.846736  | 2.716853  | -4.602332 |
| 52 | 6 | 0 | 3.424670  | -1.249706 | 0.359942  |
| 53 | 6 | 0 | 4.487545  | -1.210748 | -0.541596 |
| 54 | 6 | 0 | 3.595619  | -1.952825 | 1.558804  |
| 55 | 6 | 0 | 5.699688  | -1.822910 | -0.237125 |
| 56 | 1 | 0 | 4.379370  | -0.710708 | -1.495086 |
| 57 | 6 | 0 | 4.808756  | -2.546042 | 1.869193  |
| 58 | 1 | 0 | 2.766662  | -2.070279 | 2.245846  |

|    |   |   |           |           |           |
|----|---|---|-----------|-----------|-----------|
| 59 | 6 | 0 | 5.868927  | -2.480115 | 0.971410  |
| 60 | 1 | 0 | 6.510655  | -1.784319 | -0.955353 |
| 61 | 1 | 0 | 4.918185  | -3.079504 | 2.806225  |
| 62 | 1 | 0 | 6.814427  | -2.954335 | 1.208198  |
| 63 | 6 | 0 | -2.508306 | 0.094025  | 1.321626  |
| 64 | 6 | 0 | -2.920275 | 1.419326  | 1.465069  |
| 65 | 6 | 0 | -2.813186 | -0.823387 | 2.328587  |
| 66 | 6 | 0 | -3.606532 | 1.823706  | 2.603630  |
| 67 | 1 | 0 | -2.704650 | 2.147513  | 0.693238  |
| 68 | 6 | 0 | -3.494035 | -0.414173 | 3.467115  |
| 69 | 1 | 0 | -2.541080 | -1.865807 | 2.209362  |
| 70 | 6 | 0 | -3.889749 | 0.909969  | 3.610670  |
| 71 | 1 | 0 | -3.929634 | 2.855378  | 2.693829  |
| 72 | 1 | 0 | -3.719902 | -1.138515 | 4.241021  |
| 73 | 1 | 0 | -4.425091 | 1.225679  | 4.499335  |
| 74 | 6 | 0 | -3.114281 | -1.041503 | -1.219002 |
| 75 | 6 | 0 | -2.945633 | -2.032603 | -2.182098 |
| 76 | 6 | 0 | -4.366064 | -0.442491 | -1.073844 |
| 77 | 6 | 0 | -4.000460 | -2.403224 | -3.005266 |
| 78 | 1 | 0 | -1.990549 | -2.531854 | -2.264227 |
| 79 | 6 | 0 | -5.422600 | -0.817390 | -1.892910 |
| 80 | 1 | 0 | -4.523043 | 0.316413  | -0.316803 |
| 81 | 6 | 0 | -5.240698 | -1.794564 | -2.863993 |
| 82 | 1 | 0 | -3.856398 | -3.182943 | -3.744351 |
| 83 | 1 | 0 | -6.391699 | -0.348104 | -1.766733 |
| 84 | 1 | 0 | -6.067923 | -2.090157 | -3.499610 |

-----

**M' (NIMAG=0)**

-----

| Center<br>Number | Atomic<br>Number | Atomic<br>Type | Coordinates (Angstroms) |           |           |
|------------------|------------------|----------------|-------------------------|-----------|-----------|
|                  |                  |                | X                       | Y         | Z         |
| 1                | 44               | 0              | -0.174729               | -2.173434 | 0.024750  |
| 2                | 17               | 0              | -0.376140               | -2.339606 | -2.484344 |
| 3                | 15               | 0              | -1.803740               | -0.455263 | -0.162003 |
| 4                | 15               | 0              | 1.696936                | -0.672263 | -0.010646 |
| 5                | 8                | 0              | 1.202548                | 3.842184  | -0.917671 |
| 6                | 8                | 0              | 0.497686                | 4.178678  | -3.082313 |
| 7                | 8                | 0              | -0.535562               | 3.763884  | 1.719748  |
| 8                | 8                | 0              | 0.474027                | 3.748478  | 3.776662  |
| 9                | 8                | 0              | -0.099196               | -1.956389 | 2.999507  |
| 10               | 6                | 0              | -1.146319               | 1.013297  | -1.049564 |
| 11               | 6                | 0              | -0.150285               | 1.846323  | -0.472743 |
| 12               | 6                | 0              | 0.286100                | 2.892696  | -1.254316 |
| 13               | 6                | 0              | -0.137638               | 3.098060  | -2.556494 |
| 14               | 6                | 0              | -1.055273               | 2.270945  | -3.147059 |
| 15               | 1                | 0              | -1.373742               | 2.413020  | -4.170910 |
| 16               | 6                | 0              | -1.558704               | 1.229482  | -2.360379 |
| 17               | 1                | 0              | -2.286142               | 0.561997  | -2.802068 |
| 18               | 6                | 0              | 1.400771                | 4.634810  | -2.080859 |
| 19               | 1                | 0              | 2.427475                | 4.505062  | -2.435197 |

|    |   |   |           |           |           |
|----|---|---|-----------|-----------|-----------|
| 20 | 1 | 0 | 1.184100  | 5.680059  | -1.846985 |
| 21 | 6 | 0 | 0.482445  | 1.697450  | 0.868584  |
| 22 | 6 | 0 | 1.413556  | 0.681016  | 1.215130  |
| 23 | 6 | 0 | 2.041388  | 0.702713  | 2.453364  |
| 24 | 1 | 0 | 2.767191  | -0.059510 | 2.699323  |
| 25 | 6 | 0 | 1.790852  | 1.697471  | 3.407685  |
| 26 | 1 | 0 | 2.281371  | 1.695577  | 4.371770  |
| 27 | 6 | 0 | 0.902172  | 2.676067  | 3.054029  |
| 28 | 6 | 0 | 0.285677  | 2.678386  | 1.811911  |
| 29 | 6 | 0 | -0.134708 | -2.018619 | 1.849899  |
| 30 | 6 | 0 | -1.417263 | -4.031431 | 0.004578  |
| 31 | 6 | 0 | -0.127360 | -4.329537 | 0.504636  |
| 32 | 1 | 0 | -0.023177 | -4.548259 | 1.565447  |
| 33 | 6 | 0 | 1.037963  | -4.052864 | -0.227456 |
| 34 | 1 | 0 | 1.041485  | -4.141587 | -1.306673 |
| 35 | 1 | 0 | 1.995880  | -4.162413 | 0.267663  |
| 36 | 6 | 0 | -0.221846 | 4.567945  | 2.847767  |
| 37 | 1 | 0 | -1.143100 | 4.929916  | 3.303058  |
| 38 | 1 | 0 | 0.425988  | 5.395725  | 2.532791  |
| 39 | 1 | 0 | -2.266713 | -4.156209 | 0.667495  |
| 40 | 1 | 0 | -1.613275 | -4.193121 | -1.048156 |
| 41 | 6 | 0 | 3.229371  | -1.534189 | 0.554041  |
| 42 | 6 | 0 | 4.372373  | -1.580677 | -0.243102 |
| 43 | 6 | 0 | 3.221527  | -2.266621 | 1.746885  |
| 44 | 6 | 0 | 5.483404  | -2.319937 | 0.150931  |
| 45 | 1 | 0 | 4.402859  | -1.048825 | -1.185030 |
| 46 | 6 | 0 | 4.336097  | -2.987033 | 2.147970  |
| 47 | 1 | 0 | 2.336697  | -2.289426 | 2.370393  |
| 48 | 6 | 0 | 5.474106  | -3.016983 | 1.349070  |
| 49 | 1 | 0 | 6.357832  | -2.347555 | -0.489154 |
| 50 | 1 | 0 | 4.308927  | -3.537936 | 3.081232  |
| 51 | 1 | 0 | 6.341890  | -3.589375 | 1.656229  |
| 52 | 6 | 0 | 2.330983  | 0.324270  | -1.421771 |
| 53 | 6 | 0 | 1.912273  | 0.102576  | -2.729870 |
| 54 | 6 | 0 | 3.266150  | 1.331473  | -1.159671 |
| 55 | 6 | 0 | 2.416764  | 0.887206  | -3.762621 |
| 56 | 1 | 0 | 1.180997  | -0.668546 | -2.936734 |
| 57 | 6 | 0 | 3.779332  | 2.096857  | -2.194293 |
| 58 | 1 | 0 | 3.589423  | 1.520760  | -0.141930 |
| 59 | 6 | 0 | 3.349046  | 1.880183  | -3.500793 |
| 60 | 1 | 0 | 2.071503  | 0.716275  | -4.775683 |
| 61 | 1 | 0 | 4.510914  | 2.868334  | -1.979574 |
| 62 | 1 | 0 | 3.741206  | 2.486405  | -4.310159 |
| 63 | 6 | 0 | -2.490886 | 0.203446  | 1.413257  |
| 64 | 6 | 0 | -2.686603 | 1.560760  | 1.654553  |
| 65 | 6 | 0 | -2.926198 | -0.720945 | 2.363264  |
| 66 | 6 | 0 | -3.268716 | 1.987601  | 2.841653  |
| 67 | 1 | 0 | -2.381803 | 2.297726  | 0.922750  |
| 68 | 6 | 0 | -3.518575 | -0.295817 | 3.543065  |
| 69 | 1 | 0 | -2.804026 | -1.782329 | 2.176321  |
| 70 | 6 | 0 | -3.682998 | 1.062109  | 3.789676  |
| 71 | 1 | 0 | -3.403805 | 3.048956  | 3.017811  |
| 72 | 1 | 0 | -3.846364 | -1.026545 | 4.273306  |

|    |   |   |           |           |           |
|----|---|---|-----------|-----------|-----------|
| 73 | 1 | 0 | -4.136752 | 1.395721  | 4.716058  |
| 74 | 6 | 0 | -3.399487 | -0.784055 | -1.027796 |
| 75 | 6 | 0 | -4.416855 | 0.175042  | -0.978367 |
| 76 | 6 | 0 | -3.627986 | -1.975061 | -1.708411 |
| 77 | 6 | 0 | -5.633794 | -0.055738 | -1.599484 |
| 78 | 1 | 0 | -4.261487 | 1.108022  | -0.449437 |
| 79 | 6 | 0 | -4.852471 | -2.207648 | -2.327007 |
| 80 | 1 | 0 | -2.837455 | -2.705314 | -1.783483 |
| 81 | 6 | 0 | -5.855910 | -1.252192 | -2.274299 |
| 82 | 1 | 0 | -6.412145 | 0.697446  | -1.552726 |
| 83 | 1 | 0 | -5.012775 | -3.139720 | -2.856661 |
| 84 | 1 | 0 | -6.809335 | -1.434781 | -2.757525 |

-----

**N'** (NIMAG=0)

| Center<br>Number | Atomic<br>Number | Atomic<br>Type | Coordinates (Angstroms) |           |           |
|------------------|------------------|----------------|-------------------------|-----------|-----------|
|                  |                  |                | X                       | Y         | Z         |
| 1                | 44               | 0              | 0.242620                | -2.149997 | -0.047917 |
| 2                | 17               | 0              | 0.322038                | -2.366042 | 2.456396  |
| 3                | 15               | 0              | 1.806558                | -0.386750 | 0.180097  |
| 4                | 15               | 0              | -1.675194               | -0.722829 | 0.013618  |
| 5                | 8                | 0              | -1.316813               | 3.823868  | 0.889443  |
| 6                | 8                | 0              | -0.611644               | 4.219071  | 3.043324  |
| 7                | 8                | 0              | 0.435780                | 3.767368  | -1.732272 |
| 8                | 8                | 0              | -0.576060               | 3.720279  | -3.787863 |
| 9                | 8                | 0              | 0.145816                | -1.964863 | -3.023714 |
| 10               | 6                | 0              | 1.118054                | 1.071312  | 1.057126  |
| 11               | 6                | 0              | 0.094102                | 1.862992  | 0.470479  |
| 12               | 6                | 0              | -0.371910               | 2.907272  | 1.237277  |
| 13               | 6                | 0              | 0.053060                | 3.148723  | 2.533370  |
| 14               | 6                | 0              | 1.001203                | 2.363009  | 3.131976  |
| 15               | 1                | 0              | 1.322855                | 2.535457  | 4.150190  |
| 16               | 6                | 0              | 1.532550                | 1.323504  | 2.360379  |
| 17               | 1                | 0              | 2.286236                | 0.689123  | 2.807283  |
| 18               | 6                | 0              | -1.549005               | 4.614719  | 2.047371  |
| 19               | 1                | 0              | -2.563536               | 4.430047  | 2.412866  |
| 20               | 1                | 0              | -1.393429               | 5.667890  | 1.802582  |
| 21               | 6                | 0              | -0.530934               | 1.680803  | -0.871274 |
| 22               | 6                | 0              | -1.435833               | 0.638662  | -1.214105 |
| 23               | 6                | 0              | -2.067852               | 0.643214  | -2.450174 |
| 24               | 1                | 0              | -2.777625               | -0.135098 | -2.691596 |
| 25               | 6                | 0              | -1.844259               | 1.641097  | -3.408110 |
| 26               | 1                | 0              | -2.339240               | 1.625755  | -4.369797 |
| 27               | 6                | 0              | -0.976139               | 2.639984  | -3.061036 |
| 28               | 6                | 0              | -0.357372               | 2.660959  | -1.820154 |
| 29               | 6                | 0              | 0.193355                | -2.006294 | -1.874942 |
| 30               | 6                | 0              | -0.844173               | -4.116899 | -0.315968 |
| 31               | 6                | 0              | 0.451998                | -4.335955 | 0.183189  |
| 32               | 1                | 0              | 0.536111                | -4.580729 | 1.235364  |
| 33               | 6                | 0              | 1.626805                | -3.906991 | -0.465682 |

|    |   |   |           |           |           |
|----|---|---|-----------|-----------|-----------|
| 34 | 1 | 0 | 1.719421  | -3.981337 | -1.544827 |
| 35 | 1 | 0 | 2.563847  | -3.993505 | 0.072207  |
| 36 | 6 | 0 | 0.104212  | 4.558615  | -2.864342 |
| 37 | 1 | 0 | 1.017487  | 4.936576  | -3.322881 |
| 38 | 1 | 0 | -0.559682 | 5.374861  | -2.552938 |
| 39 | 1 | 0 | -1.056271 | -4.211302 | -1.375681 |
| 40 | 1 | 0 | -1.683363 | -4.324763 | 0.338496  |
| 41 | 6 | 0 | -3.183725 | -1.638682 | -0.526608 |
| 42 | 6 | 0 | -4.290456 | -1.761311 | 0.313346  |
| 43 | 6 | 0 | -3.188819 | -2.337924 | -1.738541 |
| 44 | 6 | 0 | -5.379980 | -2.542384 | -0.057992 |
| 45 | 1 | 0 | -4.308125 | -1.255883 | 1.270146  |
| 46 | 6 | 0 | -4.283278 | -3.100386 | -2.116183 |
| 47 | 1 | 0 | -2.329422 | -2.301749 | -2.395958 |
| 48 | 6 | 0 | -5.385581 | -3.205970 | -1.275237 |
| 49 | 1 | 0 | -6.226012 | -2.628818 | 0.614244  |
| 50 | 1 | 0 | -4.267534 | -3.624862 | -3.064784 |
| 51 | 1 | 0 | -6.237185 | -3.810861 | -1.564976 |
| 52 | 6 | 0 | -2.335789 | 0.270919  | 1.418320  |
| 53 | 6 | 0 | -1.884677 | 0.117668  | 2.725279  |
| 54 | 6 | 0 | -3.328094 | 1.217899  | 1.141153  |
| 55 | 6 | 0 | -2.416167 | 0.906555  | 3.741052  |
| 56 | 1 | 0 | -1.111611 | -0.606886 | 2.944296  |
| 57 | 6 | 0 | -3.866503 | 1.988354  | 2.158950  |
| 58 | 1 | 0 | -3.677813 | 1.355944  | 0.123914  |
| 59 | 6 | 0 | -3.406348 | 1.837361  | 3.464467  |
| 60 | 1 | 0 | -2.046406 | 0.787696  | 4.752926  |
| 61 | 1 | 0 | -4.641518 | 2.712294  | 1.931678  |
| 62 | 1 | 0 | -3.820039 | 2.446101  | 4.261210  |
| 63 | 6 | 0 | 2.507004  | 0.290014  | -1.380539 |
| 64 | 6 | 0 | 2.670765  | 1.652693  | -1.615413 |
| 65 | 6 | 0 | 2.973657  | -0.620527 | -2.329465 |
| 66 | 6 | 0 | 3.254827  | 2.097895  | -2.795010 |
| 67 | 1 | 0 | 2.336617  | 2.378540  | -0.885164 |
| 68 | 6 | 0 | 3.567164  | -0.176424 | -3.501651 |
| 69 | 1 | 0 | 2.877235  | -1.685143 | -2.146870 |
| 70 | 6 | 0 | 3.701347  | 1.186188  | -3.741663 |
| 71 | 1 | 0 | 3.365166  | 3.162863  | -2.966549 |
| 72 | 1 | 0 | 3.920065  | -0.896120 | -4.231170 |
| 73 | 1 | 0 | 4.156274  | 1.534066  | -4.662209 |
| 74 | 6 | 0 | 3.383864  | -0.721890 | 1.075264  |
| 75 | 6 | 0 | 4.427944  | 0.206391  | 1.010265  |
| 76 | 6 | 0 | 3.567173  | -1.896342 | 1.799671  |
| 77 | 6 | 0 | 5.628571  | -0.037425 | 1.658796  |
| 78 | 1 | 0 | 4.307236  | 1.123611  | 0.445706  |
| 79 | 6 | 0 | 4.774408  | -2.140455 | 2.446554  |
| 80 | 1 | 0 | 2.753138  | -2.602337 | 1.887291  |
| 81 | 6 | 0 | 5.805580  | -1.215323 | 2.377537  |
| 82 | 1 | 0 | 6.429279  | 0.690968  | 1.598681  |
| 83 | 1 | 0 | 4.900388  | -3.057601 | 3.010530  |
| 84 | 1 | 0 | 6.745950  | -1.408000 | 2.881972  |

---

**B'** (NIMAG=0)

| Center<br>Number | Atomic<br>Number | Atomic<br>Type | Coordinates (Angstroms) |           |           |
|------------------|------------------|----------------|-------------------------|-----------|-----------|
|                  |                  |                | X                       | Y         | Z         |
| 1                | 44               | 0              | -0.861061               | -1.631458 | -0.839621 |
| 2                | 17               | 0              | 0.201708                | -3.719583 | -1.651520 |
| 3                | 15               | 0              | -1.715489               | 0.448080  | -0.239078 |
| 4                | 15               | 0              | 1.356714                | -1.119087 | 0.001038  |
| 5                | 8                | 0              | 2.075199                | 4.198068  | -2.851590 |
| 6                | 8                | 0              | 2.703224                | 3.263424  | -0.859148 |
| 7                | 8                | 0              | 0.866095                | 3.806488  | 1.790863  |
| 8                | 8                | 0              | 1.613117                | 3.344015  | 3.911159  |
| 9                | 8                | 0              | -0.529062               | -0.624797 | -3.612584 |
| 10               | 6                | 0              | -0.653050               | 1.754632  | -0.996431 |
| 11               | 6                | 0              | -1.035414               | 2.370392  | -2.181611 |
| 12               | 1                | 0              | -2.023075               | 2.190941  | -2.582516 |
| 13               | 6                | 0              | -0.184937               | 3.217536  | -2.902271 |
| 14               | 1                | 0              | -0.499392               | 3.685784  | -3.825151 |
| 15               | 6                | 0              | 1.066158                | 3.413672  | -2.384142 |
| 16               | 6                | 0              | 3.200440                | 3.855527  | -2.051144 |
| 17               | 1                | 0              | 3.756142                | 4.757970  | -1.801972 |
| 18               | 1                | 0              | 3.817810                | 3.123475  | -2.586932 |
| 19               | 6                | 0              | 1.449902                | 2.833047  | -1.182965 |
| 20               | 6                | 0              | 0.637639                | 1.997420  | -0.452541 |
| 21               | 6                | 0              | 1.133021                | 1.546420  | 0.879318  |
| 22               | 6                | 0              | 1.239265                | 2.498804  | 1.866160  |
| 23               | 6                | 0              | 1.301886                | 4.397177  | 3.006055  |
| 24               | 1                | 0              | 2.202351                | 4.994515  | 2.817984  |
| 25               | 1                | 0              | 0.497927                | 5.004534  | 3.422077  |
| 26               | 6                | 0              | 1.694990                | 2.221791  | 3.145456  |
| 27               | 6                | 0              | 2.110060                | 0.965689  | 3.498177  |
| 28               | 1                | 0              | 2.470856                | 0.744277  | 4.493803  |
| 29               | 6                | 0              | 2.029338                | -0.020884 | 2.508687  |
| 30               | 1                | 0              | 2.354450                | -1.021056 | 2.760711  |
| 31               | 6                | 0              | 1.547536                | 0.238082  | 1.229112  |
| 32               | 6                | 0              | -0.625882               | -0.985774 | -2.525323 |
| 33               | 6                | 0              | -2.726835               | -2.572391 | -1.294354 |
| 34               | 1                | 0              | -2.660535               | -3.199424 | -2.179673 |
| 35               | 1                | 0              | -3.601080               | -1.926974 | -1.306402 |
| 36               | 6                | 0              | -2.429732               | -3.267553 | -0.054904 |
| 37               | 6                | 0              | -2.732069               | -2.862748 | 1.212153  |
| 38               | 6                | 0              | -2.257492               | -3.654736 | 2.399983  |
| 39               | 1                | 0              | -1.548471               | -4.433522 | 2.113460  |
| 40               | 1                | 0              | -1.787177               | -3.009670 | 3.151948  |
| 41               | 1                | 0              | -3.109955               | -4.133949 | 2.896010  |
| 42               | 6                | 0              | -3.807284               | -1.859171 | 1.520483  |
| 43               | 1                | 0              | -3.546553               | -1.211001 | 2.359572  |
| 44               | 1                | 0              | -4.069572               | -1.237819 | 0.666943  |
| 45               | 1                | 0              | -4.709278               | -2.410523 | 1.814437  |
| 46               | 1                | 0              | -1.817924               | -4.159826 | -0.143790 |



|    |   |   |           |           |           |
|----|---|---|-----------|-----------|-----------|
| 47 | 6 | 0 | -1.745275 | 1.002379  | 1.513305  |
| 48 | 6 | 0 | -2.021933 | 2.334643  | 1.826746  |
| 49 | 6 | 0 | -1.402913 | 0.122889  | 2.535249  |
| 50 | 6 | 0 | -1.987755 | 2.767600  | 3.144316  |
| 51 | 1 | 0 | -2.236552 | 3.043216  | 1.034225  |
| 52 | 6 | 0 | -1.355524 | 0.558255  | 3.852686  |
| 53 | 1 | 0 | -1.141292 | -0.899978 | 2.288342  |
| 54 | 6 | 0 | -1.653975 | 1.879392  | 4.160223  |
| 55 | 1 | 0 | -2.205817 | 3.804231  | 3.375081  |
| 56 | 1 | 0 | -1.068061 | -0.132544 | 4.636798  |
| 57 | 1 | 0 | -1.607796 | 2.221607  | 5.187639  |
| 58 | 6 | 0 | -3.414913 | 0.832857  | -0.851818 |
| 59 | 6 | 0 | -4.416855 | 1.376820  | -0.047668 |
| 60 | 6 | 0 | -3.733914 | 0.491256  | -2.170445 |
| 61 | 6 | 0 | -5.692041 | 1.598433  | -0.555045 |
| 62 | 1 | 0 | -4.219183 | 1.612244  | 0.989609  |
| 63 | 6 | 0 | -5.002079 | 0.726868  | -2.680728 |
| 64 | 1 | 0 | -2.993005 | 0.019509  | -2.803854 |
| 65 | 6 | 0 | -5.986719 | 1.283674  | -1.873675 |
| 66 | 1 | 0 | -6.457122 | 2.015289  | 0.089984  |
| 67 | 1 | 0 | -5.223089 | 0.457185  | -3.706882 |
| 68 | 1 | 0 | -6.981460 | 1.457586  | -2.267746 |
| 69 | 6 | 0 | 2.633309  | -0.672952 | -1.247599 |
| 70 | 6 | 0 | 3.651560  | 0.235423  | -0.954061 |
| 71 | 6 | 0 | 2.616512  | -1.295039 | -2.497143 |
| 72 | 6 | 0 | 4.626227  | 0.528525  | -1.899784 |
| 73 | 1 | 0 | 3.685157  | 0.726000  | 0.010749  |
| 74 | 6 | 0 | 3.590164  | -0.995796 | -3.440726 |
| 75 | 1 | 0 | 1.855617  | -2.032891 | -2.722357 |
| 76 | 6 | 0 | 4.594743  | -0.081758 | -3.147533 |
| 77 | 1 | 0 | 5.415121  | 1.231355  | -1.653854 |
| 78 | 1 | 0 | 3.561710  | -1.484497 | -4.407637 |
| 79 | 1 | 0 | 5.354831  | 0.147925  | -3.886225 |
| 80 | 6 | 0 | 2.115846  | -2.533745 | 0.886018  |
| 81 | 6 | 0 | 1.283017  | -3.313748 | 1.685523  |
| 82 | 6 | 0 | 3.473946  | -2.831782 | 0.822098  |
| 83 | 6 | 0 | 1.798605  | -4.362424 | 2.431038  |
| 84 | 1 | 0 | 0.220061  | -3.103258 | 1.705336  |
| 85 | 6 | 0 | 3.989907  | -3.891792 | 1.559277  |
| 86 | 1 | 0 | 4.131249  | -2.244872 | 0.191386  |
| 87 | 6 | 0 | 3.156871  | -4.653952 | 2.367796  |
| 88 | 1 | 0 | 1.138308  | -4.963169 | 3.046564  |
| 89 | 1 | 0 | 5.046935  | -4.124186 | 1.496212  |
| 90 | 1 | 0 | 3.562479  | -5.481681 | 2.938598  |

-----  
**O' (NIMAG=0)**

| Center<br>Number | Atomic<br>Number | Atomic<br>Type | Coordinates (Angstroms) |          |          |
|------------------|------------------|----------------|-------------------------|----------|----------|
|                  |                  |                | X                       | Y        | Z        |
| 1                | 44               | 0              | -1.179818               | 1.602321 | 0.036753 |

|    |    |   |           |           |           |
|----|----|---|-----------|-----------|-----------|
| 2  | 17 | 0 | -0.368485 | 3.926954  | 0.551137  |
| 3  | 15 | 0 | -1.595524 | -0.691328 | 0.016747  |
| 4  | 15 | 0 | 1.174985  | 1.288825  | -0.209685 |
| 5  | 8  | 0 | 2.306957  | -3.191884 | 3.749723  |
| 6  | 8  | 0 | 3.029344  | -2.611797 | 1.652616  |
| 7  | 8  | 0 | 1.668672  | -3.904876 | -0.918346 |
| 8  | 8  | 0 | 2.561188  | -3.762132 | -3.035562 |
| 9  | 8  | 0 | -1.598772 | 1.582886  | 3.031141  |
| 10 | 6  | 0 | -0.470139 | -1.558338 | 1.200160  |
| 11 | 6  | 0 | -0.897513 | -1.952769 | 2.462305  |
| 12 | 1  | 0 | -1.935705 | -1.850616 | 2.737144  |
| 13 | 6  | 0 | -0.034729 | -2.506659 | 3.415572  |
| 14 | 1  | 0 | -0.389096 | -2.809175 | 4.391738  |
| 15 | 6  | 0 | 1.275053  | -2.652680 | 3.047525  |
| 16 | 6  | 0 | 3.466366  | -2.928639 | 2.967093  |
| 17 | 1  | 0 | 4.091190  | -3.820396 | 2.934507  |
| 18 | 1  | 0 | 3.998540  | -2.067856 | 3.388673  |
| 19 | 6  | 0 | 1.710915  | -2.293286 | 1.781288  |
| 20 | 6  | 0 | 0.887906  | -1.739229 | 0.828328  |
| 21 | 6  | 0 | 1.454540  | -1.496695 | -0.525551 |
| 22 | 6  | 0 | 1.812720  | -2.598103 | -1.267841 |
| 23 | 6  | 0 | 2.148615  | -4.667915 | -2.016500 |
| 24 | 1  | 0 | 3.004825  | -5.267619 | -1.694851 |
| 25 | 1  | 0 | 1.340891  | -5.296995 | -2.400071 |
| 26 | 6  | 0 | 2.355710  | -2.513636 | -2.538831 |
| 27 | 6  | 0 | 2.613109  | -1.302039 | -3.121411 |
| 28 | 1  | 0 | 3.054230  | -1.226922 | -4.106422 |
| 29 | 6  | 0 | 2.279505  | -0.162763 | -2.378185 |
| 30 | 1  | 0 | 2.500144  | 0.801947  | -2.811355 |
| 31 | 6  | 0 | 1.700025  | -0.231830 | -1.115857 |
| 32 | 6  | 0 | -1.396713 | 1.538349  | 1.901585  |
| 33 | 6  | 0 | -1.537699 | 2.287539  | -2.069685 |
| 34 | 1  | 0 | -1.199582 | 1.765348  | -2.957454 |
| 35 | 1  | 0 | -1.244111 | 3.330689  | -2.023934 |
| 36 | 6  | 0 | -2.762619 | 1.873547  | -1.501470 |
| 37 | 6  | 0 | -3.352704 | 2.500736  | -0.389364 |
| 38 | 6  | 0 | -4.605241 | 1.887472  | 0.196225  |
| 39 | 1  | 0 | -4.739254 | 0.845494  | -0.086547 |
| 40 | 1  | 0 | -4.607367 | 1.952298  | 1.286872  |
| 41 | 1  | 0 | -5.479183 | 2.446525  | -0.158532 |
| 42 | 6  | 0 | -3.347056 | 4.003813  | -0.221881 |
| 43 | 1  | 0 | -3.271430 | 4.289133  | 0.828990  |
| 44 | 1  | 0 | -2.538337 | 4.500318  | -0.748315 |
| 45 | 1  | 0 | -4.302539 | 4.382351  | -0.607119 |
| 46 | 1  | 0 | -3.189480 | 0.927991  | -1.833172 |
| 47 | 6  | 0 | -1.373715 | -1.745080 | -1.475813 |
| 48 | 6  | 0 | -1.449265 | -3.135433 | -1.358830 |
| 49 | 6  | 0 | -1.097533 | -1.182435 | -2.715831 |
| 50 | 6  | 0 | -1.260247 | -3.942257 | -2.469823 |
| 51 | 1  | 0 | -1.643180 | -3.586651 | -0.391919 |
| 52 | 6  | 0 | -0.893664 | -1.991595 | -3.827414 |
| 53 | 1  | 0 | -0.997622 | -0.110093 | -2.798518 |
| 54 | 6  | 0 | -0.975982 | -3.371731 | -3.707067 |

|    |   |   |           |           |           |
|----|---|---|-----------|-----------|-----------|
| 55 | 1 | 0 | -1.325561 | -5.019932 | -2.367694 |
| 56 | 1 | 0 | -0.657672 | -1.540830 | -4.784268 |
| 57 | 1 | 0 | -0.812024 | -4.003418 | -4.572705 |
| 58 | 6 | 0 | -3.300349 | -1.175945 | 0.538784  |
| 59 | 6 | 0 | -4.167177 | -1.829638 | -0.339011 |
| 60 | 6 | 0 | -3.799386 | -0.774480 | 1.782463  |
| 61 | 6 | 0 | -5.483076 | -2.093594 | 0.024492  |
| 62 | 1 | 0 | -3.827789 | -2.129074 | -1.321833 |
| 63 | 6 | 0 | -5.103625 | -1.061596 | 2.154631  |
| 64 | 1 | 0 | -3.186434 | -0.198621 | 2.462108  |
| 65 | 6 | 0 | -5.952994 | -1.721595 | 1.275416  |
| 66 | 1 | 0 | -6.139656 | -2.593257 | -0.678578 |
| 67 | 1 | 0 | -5.462869 | -0.742961 | 3.126308  |
| 68 | 1 | 0 | -6.977567 | -1.932121 | 1.559724  |
| 69 | 6 | 0 | 2.205385  | 1.159519  | 1.311582  |
| 70 | 6 | 0 | 3.438288  | 0.504938  | 1.278995  |
| 71 | 6 | 0 | 1.805930  | 1.795672  | 2.484732  |
| 72 | 6 | 0 | 4.245663  | 0.470956  | 2.406967  |
| 73 | 1 | 0 | 3.770305  | 0.016218  | 0.370762  |
| 74 | 6 | 0 | 2.609594  | 1.748632  | 3.617405  |
| 75 | 1 | 0 | 0.885208  | 2.362556  | 2.504052  |
| 76 | 6 | 0 | 3.828417  | 1.083900  | 3.583309  |
| 77 | 1 | 0 | 5.205334  | -0.032715 | 2.362843  |
| 78 | 1 | 0 | 2.282981  | 2.244943  | 4.523752  |
| 79 | 1 | 0 | 4.457776  | 1.054722  | 4.466072  |
| 80 | 6 | 0 | 2.043987  | 2.637203  | -1.121384 |
| 81 | 6 | 0 | 1.623477  | 2.995115  | -2.403362 |
| 82 | 6 | 0 | 3.096712  | 3.343999  | -0.544582 |
| 83 | 6 | 0 | 2.248873  | 4.018746  | -3.098556 |
| 84 | 1 | 0 | 0.797249  | 2.472105  | -2.862966 |
| 85 | 6 | 0 | 3.717436  | 4.376570  | -1.237463 |
| 86 | 1 | 0 | 3.429272  | 3.111100  | 0.457969  |
| 87 | 6 | 0 | 3.299783  | 4.716285  | -2.515422 |
| 88 | 1 | 0 | 1.904779  | 4.279583  | -4.093040 |
| 89 | 1 | 0 | 4.526753  | 4.922129  | -0.765740 |
| 90 | 1 | 0 | 3.782707  | 5.525239  | -3.051797 |

-----

**P' (NIMAG=0)**

| Center<br>Number | Atomic<br>Number | Atomic<br>Type | Coordinates (Angstroms) |           |           |
|------------------|------------------|----------------|-------------------------|-----------|-----------|
|                  |                  |                | X                       | Y         | Z         |
| 1                | 44               | 0              | 1.072504                | -1.747946 | -0.040718 |
| 2                | 17               | 0              | 0.293166                | -4.056519 | 0.612005  |
| 3                | 15               | 0              | 1.650572                | 0.537612  | -0.072777 |
| 4                | 15               | 0              | -1.270595               | -1.254659 | -0.194237 |
| 5                | 8                | 0              | -1.851877               | 3.299578  | 3.880137  |
| 6                | 8                | 0              | -2.729565               | 2.819877  | 1.816536  |
| 7                | 8                | 0              | -1.480729               | 3.984058  | -0.804218 |
| 8                | 8                | 0              | -2.403386               | 3.911765  | -2.911171 |
| 9                | 8                | 0              | 1.401214                | -1.665984 | 2.958921  |

|    |   |   |           |           |           |
|----|---|---|-----------|-----------|-----------|
| 10 | 6 | 0 | 0.624279  | 1.432923  | 1.185731  |
| 11 | 6 | 0 | 1.143220  | 1.751435  | 2.434798  |
| 12 | 1 | 0 | 2.175526  | 1.530333  | 2.660951  |
| 13 | 6 | 0 | 0.384682  | 2.371948  | 3.434185  |
| 14 | 1 | 0 | 0.808496  | 2.612227  | 4.399880  |
| 15 | 6 | 0 | -0.914843 | 2.666794  | 3.124144  |
| 16 | 6 | 0 | -3.066825 | 3.174225  | 3.151374  |
| 17 | 1 | 0 | -3.588834 | 4.130605  | 3.149460  |
| 18 | 1 | 0 | -3.673211 | 2.376845  | 3.596240  |
| 19 | 6 | 0 | -1.442950 | 2.372998  | 1.876422  |
| 20 | 6 | 0 | -0.726501 | 1.749558  | 0.880658  |
| 21 | 6 | 0 | -1.370893 | 1.562877  | -0.446784 |
| 22 | 6 | 0 | -1.695791 | 2.690652  | -1.165770 |
| 23 | 6 | 0 | -1.977323 | 4.783438  | -1.868001 |
| 24 | 1 | 0 | -2.830222 | 5.370755  | -1.513879 |
| 25 | 1 | 0 | -1.176095 | 5.425821  | -2.241309 |
| 26 | 6 | 0 | -2.252590 | 2.648351  | -2.433129 |
| 27 | 6 | 0 | -2.539590 | 1.457992  | -3.046610 |
| 28 | 1 | 0 | -2.965782 | 1.419050  | -4.040221 |
| 29 | 6 | 0 | -2.249438 | 0.293917  | -2.325358 |
| 30 | 1 | 0 | -2.480374 | -0.658728 | -2.782891 |
| 31 | 6 | 0 | -1.687056 | 0.320967  | -1.052950 |
| 32 | 6 | 0 | 1.257093  | -1.658356 | 1.821183  |
| 33 | 6 | 0 | 3.200771  | -2.534308 | -0.587544 |
| 34 | 6 | 0 | 2.195693  | -2.993494 | -1.473975 |
| 35 | 6 | 0 | 1.469769  | -2.126645 | -2.297839 |
| 36 | 1 | 0 | 1.830338  | -4.006813 | -1.351205 |
| 37 | 1 | 0 | 1.960433  | -1.242492 | -2.679485 |
| 38 | 1 | 0 | 0.695134  | -2.527840 | -2.939533 |
| 39 | 6 | 0 | 4.240982  | -1.574054 | -1.133114 |
| 40 | 1 | 0 | 3.827888  | -0.773164 | -1.746944 |
| 41 | 1 | 0 | 4.838914  | -1.123514 | -0.342493 |
| 42 | 1 | 0 | 4.927825  | -2.150935 | -1.765812 |
| 43 | 6 | 0 | 3.798064  | -3.527969 | 0.386477  |
| 44 | 1 | 0 | 4.622584  | -4.080252 | -0.083722 |
| 45 | 1 | 0 | 4.214208  | -3.004623 | 1.252557  |
| 46 | 1 | 0 | 3.053874  | -4.241198 | 0.742387  |
| 47 | 6 | 0 | 1.429069  | 1.687864  | -1.500148 |
| 48 | 6 | 0 | 1.618924  | 3.058966  | -1.297310 |
| 49 | 6 | 0 | 1.014658  | 1.246839  | -2.752471 |
| 50 | 6 | 0 | 1.436967  | 3.958218  | -2.336061 |
| 51 | 1 | 0 | 1.895774  | 3.426339  | -0.315400 |
| 52 | 6 | 0 | 0.823634  | 2.149598  | -3.792170 |
| 53 | 1 | 0 | 0.780239  | 0.204220  | -2.903239 |
| 54 | 6 | 0 | 1.041959  | 3.504515  | -3.590499 |
| 55 | 1 | 0 | 1.593085  | 5.016958  | -2.161212 |
| 56 | 1 | 0 | 0.482727  | 1.789633  | -4.755808 |
| 57 | 1 | 0 | 0.888629  | 4.207203  | -4.401673 |
| 58 | 6 | 0 | 3.386132  | 0.912052  | 0.455524  |
| 59 | 6 | 0 | 4.245560  | 1.706701  | -0.302584 |
| 60 | 6 | 0 | 3.902721  | 0.286983  | 1.595400  |
| 61 | 6 | 0 | 5.570778  | 1.887563  | 0.076554  |
| 62 | 1 | 0 | 3.900744  | 2.171784  | -1.215800 |

|    |   |   |           |           |           |
|----|---|---|-----------|-----------|-----------|
| 63 | 6 | 0 | 5.219382  | 0.482360  | 1.984877  |
| 64 | 1 | 0 | 3.290295  | -0.382075 | 2.182259  |
| 65 | 6 | 0 | 6.061737  | 1.284256  | 1.224601  |
| 66 | 1 | 0 | 6.220524  | 2.499979  | -0.538179 |
| 67 | 1 | 0 | 5.590039  | -0.012218 | 2.875258  |
| 68 | 1 | 0 | 7.095203  | 1.426195  | 1.519135  |
| 69 | 6 | 0 | -2.230568 | -1.116374 | 1.375932  |
| 70 | 6 | 0 | -3.308694 | -0.239855 | 1.507812  |
| 71 | 6 | 0 | -1.930107 | -1.980879 | 2.428518  |
| 72 | 6 | 0 | -4.063910 | -0.221492 | 2.672714  |
| 73 | 1 | 0 | -3.559016 | 0.445240  | 0.706717  |
| 74 | 6 | 0 | -2.679688 | -1.951019 | 3.597420  |
| 75 | 1 | 0 | -1.127414 | -2.700526 | 2.324866  |
| 76 | 6 | 0 | -3.747216 | -1.071973 | 3.724659  |
| 77 | 1 | 0 | -4.908587 | 0.454744  | 2.750777  |
| 78 | 1 | 0 | -2.429214 | -2.626810 | 4.406830  |
| 79 | 1 | 0 | -4.335415 | -1.056091 | 4.635521  |
| 80 | 6 | 0 | -2.324997 | -2.461913 | -1.114663 |
| 81 | 6 | 0 | -1.758229 | -3.478507 | -1.877339 |
| 82 | 6 | 0 | -3.717735 | -2.347686 | -1.078014 |
| 83 | 6 | 0 | -2.560709 | -4.349072 | -2.606108 |
| 84 | 1 | 0 | -0.688884 | -3.619199 | -1.870322 |
| 85 | 6 | 0 | -4.518924 | -3.215667 | -1.804256 |
| 86 | 1 | 0 | -4.186849 | -1.575942 | -0.480526 |
| 87 | 6 | 0 | -3.941099 | -4.218074 | -2.575515 |
| 88 | 1 | 0 | -2.099562 | -5.141116 | -3.184798 |
| 89 | 1 | 0 | -5.597250 | -3.111900 | -1.762490 |
| 90 | 1 | 0 | -4.567075 | -4.900604 | -3.139448 |

-----

**Q' (NIMAG=0)**

| Center<br>Number | Atomic<br>Number | Atomic<br>Type | Coordinates (Angstroms) |           |           |
|------------------|------------------|----------------|-------------------------|-----------|-----------|
|                  |                  |                | X                       | Y         | Z         |
| 1                | 44               | 0              | -0.675457               | -1.699116 | -0.763644 |
| 2                | 17               | 0              | 0.630991                | -3.645456 | -1.562999 |
| 3                | 15               | 0              | -1.777878               | 0.270459  | -0.224762 |
| 4                | 15               | 0              | 1.469965                | -0.890698 | 0.003463  |
| 5                | 8                | 0              | 1.421245                | 4.503626  | -2.874351 |
| 6                | 8                | 0              | 2.201079                | 3.638844  | -0.903479 |
| 7                | 8                | 0              | 0.310493                | 3.946817  | 1.741175  |
| 8                | 8                | 0              | 1.136952                | 3.617233  | 3.863146  |
| 9                | 8                | 0              | -0.515762               | -0.733394 | -3.575256 |
| 10               | 6                | 0              | -0.930102               | 1.706528  | -1.006614 |
| 11               | 6                | 0              | -1.412387               | 2.279795  | -2.176158 |
| 12               | 1                | 0              | -2.378467               | 1.984504  | -2.559154 |
| 13               | 6                | 0              | -0.692324               | 3.238639  | -2.899320 |
| 14               | 1                | 0              | -1.083376               | 3.675356  | -3.808298 |
| 15               | 6                | 0              | 0.533099                | 3.588478  | -2.401114 |
| 16               | 6                | 0              | 2.594008                | 4.311594  | -2.091534 |
| 17               | 1                | 0              | 3.020622                | 5.279724  | -1.834446 |

|    |   |   |           |           |           |
|----|---|---|-----------|-----------|-----------|
| 18 | 1 | 0 | 3.300834  | 3.681807  | -2.646106 |
| 19 | 6 | 0 | 1.010765  | 3.050997  | -1.213350 |
| 20 | 6 | 0 | 0.325225  | 2.112509  | -0.478539 |
| 21 | 6 | 0 | 0.878894  | 1.735132  | 0.853610  |
| 22 | 6 | 0 | 0.839186  | 2.696565  | 1.837060  |
| 23 | 6 | 0 | 0.401102  | 4.516957  | 3.039437  |
| 24 | 1 | 0 | 0.930863  | 5.469967  | 2.980303  |
| 25 | 1 | 0 | -0.605285 | 4.641443  | 3.451437  |
| 26 | 6 | 0 | 1.340889  | 2.501458  | 3.113784  |
| 27 | 6 | 0 | 1.948969  | 1.327274  | 3.467392  |
| 28 | 1 | 0 | 2.356470  | 1.173487  | 4.457721  |
| 29 | 6 | 0 | 2.010106  | 0.331854  | 2.484537  |
| 30 | 1 | 0 | 2.484258  | -0.605398 | 2.741341  |
| 31 | 6 | 0 | 1.485140  | 0.503601  | 1.207624  |
| 32 | 6 | 0 | -0.542114 | -1.076178 | -2.478752 |
| 33 | 6 | 0 | -1.763400 | -3.523442 | 1.142197  |
| 34 | 6 | 0 | -2.512199 | -2.797866 | 0.246324  |
| 35 | 6 | 0 | -2.442678 | -2.847493 | -1.189730 |
| 36 | 1 | 0 | -3.166743 | -2.040685 | 0.676296  |
| 37 | 1 | 0 | -2.120882 | -3.772024 | -1.659216 |
| 38 | 1 | 0 | -3.262424 | -2.362264 | -1.708568 |
| 39 | 6 | 0 | -1.112337 | -4.839589 | 0.819278  |
| 40 | 1 | 0 | -1.169191 | -5.092938 | -0.234834 |
| 41 | 1 | 0 | -0.054270 | -4.861956 | 1.093213  |
| 42 | 1 | 0 | -1.620057 | -5.619610 | 1.400104  |
| 43 | 6 | 0 | -1.939998 | -3.278099 | 2.621051  |
| 44 | 1 | 0 | -2.464456 | -4.130104 | 3.069156  |
| 45 | 1 | 0 | -0.982063 | -3.199431 | 3.148145  |
| 46 | 1 | 0 | -2.521750 | -2.379462 | 2.829139  |
| 47 | 6 | 0 | -1.921384 | 0.848283  | 1.511245  |
| 48 | 6 | 0 | -2.463883 | 2.103550  | 1.796336  |
| 49 | 6 | 0 | -1.425113 | 0.068877  | 2.548593  |
| 50 | 6 | 0 | -2.530601 | 2.552964  | 3.106457  |
| 51 | 1 | 0 | -2.822344 | 2.734089  | 0.989890  |
| 52 | 6 | 0 | -1.478738 | 0.524263  | 3.860048  |
| 53 | 1 | 0 | -0.957915 | -0.879549 | 2.317864  |
| 54 | 6 | 0 | -2.035486 | 1.764435  | 4.141199  |
| 55 | 1 | 0 | -2.963996 | 3.523853  | 3.320297  |
| 56 | 1 | 0 | -1.070687 | -0.085565 | 4.657565  |
| 57 | 1 | 0 | -2.074405 | 2.123083  | 5.163505  |
| 58 | 6 | 0 | -3.523087 | 0.326479  | -0.820361 |
| 59 | 6 | 0 | -3.789669 | 0.058693  | -2.168259 |
| 60 | 6 | 0 | -4.602757 | 0.498764  | 0.046186  |
| 61 | 6 | 0 | -5.092252 | 0.019310  | -2.642040 |
| 62 | 1 | 0 | -2.977706 | -0.143205 | -2.855991 |
| 63 | 6 | 0 | -5.909513 | 0.440736  | -0.426671 |
| 64 | 1 | 0 | -4.435432 | 0.671473  | 1.101427  |
| 65 | 6 | 0 | -6.158556 | 0.212794  | -1.771579 |
| 66 | 1 | 0 | -5.272584 | -0.182822 | -3.691448 |
| 67 | 1 | 0 | -6.733034 | 0.572822  | 0.265747  |
| 68 | 1 | 0 | -7.177362 | 0.170660  | -2.139283 |
| 69 | 6 | 0 | 2.633150  | -0.285355 | -1.288262 |
| 70 | 6 | 0 | 3.513599  | 0.768106  | -1.038243 |

|    |   |   |          |           |           |
|----|---|---|----------|-----------|-----------|
| 71 | 6 | 0 | 2.684125 | -0.936769 | -2.521770 |
| 72 | 6 | 0 | 4.416025 | 1.175765  | -2.012786 |
| 73 | 1 | 0 | 3.495618 | 1.280905  | -0.084665 |
| 74 | 6 | 0 | 3.585349 | -0.523796 | -3.494026 |
| 75 | 1 | 0 | 2.036263 | -1.784927 | -2.710234 |
| 76 | 6 | 0 | 4.450176 | 0.534945  | -3.245134 |
| 77 | 1 | 0 | 5.099352 | 1.991181  | -1.800682 |
| 78 | 1 | 0 | 3.611250 | -1.037363 | -4.448050 |
| 79 | 1 | 0 | 5.154248 | 0.853628  | -4.005968 |
| 80 | 6 | 0 | 2.468560 | -2.155648 | 0.878984  |
| 81 | 6 | 0 | 3.841466 | -2.299973 | 0.702006  |
| 82 | 6 | 0 | 1.808488 | -2.984909 | 1.782933  |
| 83 | 6 | 0 | 4.540793 | -3.258474 | 1.427379  |
| 84 | 1 | 0 | 4.368968 | -1.673854 | -0.007471 |
| 85 | 6 | 0 | 2.506073 | -3.932183 | 2.515879  |
| 86 | 1 | 0 | 0.735290 | -2.887034 | 1.894724  |
| 87 | 6 | 0 | 3.878152 | -4.071650 | 2.336851  |
| 88 | 1 | 0 | 5.608210 | -3.371195 | 1.275162  |
| 89 | 1 | 0 | 1.976956 | -4.573437 | 3.212077  |
| 90 | 1 | 0 | 4.426599 | -4.820273 | 2.897340  |

-----

**R' (NIMAG=0)**

| Center<br>Number | Atomic<br>Number | Atomic<br>Type | Coordinates (Angstroms) |           |           |
|------------------|------------------|----------------|-------------------------|-----------|-----------|
|                  |                  |                | X                       | Y         | Z         |
| 1                | 44               | 0              | 0.730717                | -1.863946 | -0.026219 |
| 2                | 17               | 0              | 0.798541                | -1.951458 | -2.547820 |
| 3                | 15               | 0              | -1.499260               | -1.095305 | -0.228240 |
| 4                | 15               | 0              | 1.696636                | 0.347322  | -0.043442 |
| 5                | 8                | 0              | -0.873038               | 4.123876  | -0.715704 |
| 6                | 8                | 0              | -1.727393               | 4.223012  | -2.849380 |
| 7                | 8                | 0              | -2.365116               | 3.083378  | 1.882806  |
| 8                | 8                | 0              | -1.399843               | 3.547153  | 3.908372  |
| 9                | 8                | 0              | 0.723566                | -1.629622 | 2.947638  |
| 10               | 6                | 0              | -1.648069               | 0.544671  | -1.034219 |
| 11               | 6                | 0              | -1.141421               | 1.709379  | -0.399164 |
| 12               | 6                | 0              | -1.259197               | 2.881285  | -1.111970 |
| 13               | 6                | 0              | -1.774782               | 2.942805  | -2.396540 |
| 14               | 6                | 0              | -2.229259               | 1.821846  | -3.037958 |
| 15               | 1                | 0              | -2.617353               | 1.861698  | -4.046827 |
| 16               | 6                | 0              | -2.162241               | 0.619925  | -2.323864 |
| 17               | 1                | 0              | -2.516038               | -0.282035 | -2.805082 |
| 18               | 6                | 0              | -1.084173               | 4.981111  | -1.828985 |
| 19               | 1                | 0              | -0.117655               | 5.336242  | -2.198627 |
| 20               | 1                | 0              | -1.732064               | 5.808288  | -1.530407 |
| 21               | 6                | 0              | -0.490344               | 1.804684  | 0.939882  |
| 22               | 6                | 0              | 0.836740                | 1.381287  | 1.229023  |
| 23               | 6                | 0              | 1.419243                | 1.709279  | 2.445695  |
| 24               | 1                | 0              | 2.440745                | 1.423177  | 2.646673  |
| 25               | 6                | 0              | 0.742847                | 2.428507  | 3.439348  |

|    |   |   |           |           |           |
|----|---|---|-----------|-----------|-----------|
| 26 | 1 | 0 | 1.216025  | 2.680376  | 4.378917  |
| 27 | 6 | 0 | -0.540652 | 2.806174  | 3.155981  |
| 28 | 6 | 0 | -1.125871 | 2.513999  | 1.932470  |
| 29 | 6 | 0 | 0.714320  | -1.727778 | 1.800706  |
| 30 | 6 | 0 | 2.636728  | -3.273867 | 0.207024  |
| 31 | 6 | 0 | 1.511614  | -3.896811 | -0.363959 |
| 32 | 1 | 0 | 1.534639  | -4.052288 | -1.436157 |
| 33 | 6 | 0 | 0.253843  | -4.036039 | 0.263099  |
| 34 | 1 | 0 | 0.183571  | -4.232796 | 1.328495  |
| 35 | 1 | 0 | -0.551239 | -4.469518 | -0.318489 |
| 36 | 6 | 0 | -2.639461 | 3.493870  | 3.215076  |
| 37 | 1 | 0 | -3.290676 | 2.753838  | 3.696418  |
| 38 | 1 | 0 | -3.091192 | 4.484966  | 3.201453  |
| 39 | 6 | 0 | 3.025039  | -3.569702 | 1.640179  |
| 40 | 1 | 0 | 3.527249  | -2.727504 | 2.115758  |
| 41 | 1 | 0 | 2.181652  | -3.866885 | 2.263872  |
| 42 | 1 | 0 | 3.740054  | -4.401997 | 1.635029  |
| 43 | 6 | 0 | 3.820446  | -3.001076 | -0.692495 |
| 44 | 1 | 0 | 4.431380  | -2.187865 | -0.293769 |
| 45 | 1 | 0 | 4.464366  | -3.888420 | -0.753369 |
| 46 | 1 | 0 | 3.500191  | -2.729776 | -1.699798 |
| 47 | 6 | 0 | 1.749131  | 1.589100  | -1.410160 |
| 48 | 6 | 0 | 2.184466  | 2.880506  | -1.091077 |
| 49 | 6 | 0 | 1.369190  | 1.303673  | -2.717383 |
| 50 | 6 | 0 | 2.250030  | 3.861760  | -2.066797 |
| 51 | 1 | 0 | 2.469057  | 3.121492  | -0.072837 |
| 52 | 6 | 0 | 1.422031  | 2.296830  | -3.690983 |
| 53 | 1 | 0 | 1.022863  | 0.311217  | -2.970485 |
| 54 | 6 | 0 | 1.863986  | 3.572033  | -3.372916 |
| 55 | 1 | 0 | 2.596942  | 4.855658  | -1.805773 |
| 56 | 1 | 0 | 1.110542  | 2.063765  | -4.702641 |
| 57 | 1 | 0 | 1.907238  | 4.340763  | -4.136931 |
| 58 | 6 | 0 | 3.470097  | 0.304688  | 0.449607  |
| 59 | 6 | 0 | 4.468875  | 0.669775  | -0.454072 |
| 60 | 6 | 0 | 3.851957  | -0.242084 | 1.677712  |
| 61 | 6 | 0 | 5.811058  | 0.512504  | -0.127971 |
| 62 | 1 | 0 | 4.204868  | 1.069556  | -1.424803 |
| 63 | 6 | 0 | 5.191646  | -0.379098 | 2.010711  |
| 64 | 1 | 0 | 3.101320  | -0.582734 | 2.379913  |
| 65 | 6 | 0 | 6.178015  | -0.002370 | 1.107083  |
| 66 | 1 | 0 | 6.570365  | 0.794442  | -0.848351 |
| 67 | 1 | 0 | 5.463274  | -0.798687 | 2.972813  |
| 68 | 1 | 0 | 7.225072  | -0.119889 | 1.361587  |
| 69 | 6 | 0 | -2.455625 | -0.921359 | 1.334617  |
| 70 | 6 | 0 | -3.325941 | 0.140406  | 1.573304  |
| 71 | 6 | 0 | -2.391423 | -1.963265 | 2.259894  |
| 72 | 6 | 0 | -4.102507 | 0.166698  | 2.725402  |
| 73 | 1 | 0 | -3.404138 | 0.952825  | 0.861608  |
| 74 | 6 | 0 | -3.164924 | -1.935431 | 3.411238  |
| 75 | 1 | 0 | -1.738540 | -2.808151 | 2.073051  |
| 76 | 6 | 0 | -4.021229 | -0.867128 | 3.649133  |
| 77 | 1 | 0 | -4.785685 | 0.992874  | 2.890319  |
| 78 | 1 | 0 | -3.098884 | -2.750432 | 4.122601  |



|    |   |   |           |           |           |
|----|---|---|-----------|-----------|-----------|
| 79 | 1 | 0 | -4.627690 | -0.845305 | 4.547553  |
| 80 | 6 | 0 | -2.697118 | -2.139793 | -1.173485 |
| 81 | 6 | 0 | -4.071634 | -1.917988 | -1.038810 |
| 82 | 6 | 0 | -2.260760 | -3.152483 | -2.024764 |
| 83 | 6 | 0 | -4.984778 | -2.692525 | -1.738220 |
| 84 | 1 | 0 | -4.438249 | -1.139607 | -0.380938 |
| 85 | 6 | 0 | -3.178719 | -3.930014 | -2.722968 |
| 86 | 1 | 0 | -1.201362 | -3.310240 | -2.170696 |
| 87 | 6 | 0 | -4.540063 | -3.704713 | -2.581525 |
| 88 | 1 | 0 | -6.046385 | -2.507011 | -1.620196 |
| 89 | 1 | 0 | -2.819702 | -4.711009 | -3.383498 |
| 90 | 1 | 0 | -5.254034 | -4.312872 | -3.125801 |

-----

**S' (NIMAG=0)**

| Center<br>Number | Atomic<br>Number | Atomic<br>Type | Coordinates (Angstroms) |           |           |
|------------------|------------------|----------------|-------------------------|-----------|-----------|
|                  |                  |                | X                       | Y         | Z         |
| 1                | 44               | 0              | -0.769931               | 1.860336  | -0.100178 |
| 2                | 17               | 0              | -0.775947               | 1.613372  | 2.396494  |
| 3                | 15               | 0              | -1.697486               | -0.356497 | 0.005423  |
| 4                | 15               | 0              | 1.489881                | 1.121787  | -0.168424 |
| 5                | 8                | 0              | 2.426607                | -3.103082 | 1.779444  |
| 6                | 8                | 0              | 1.496064                | -3.628538 | 3.804302  |
| 7                | 8                | 0              | 0.880198                | -4.076049 | -0.846076 |
| 8                | 8                | 0              | 1.705661                | -4.099711 | -2.993954 |
| 9                | 8                | 0              | -0.823705               | 2.032344  | -3.075717 |
| 10               | 6                | 0              | -0.799187               | -1.413199 | 1.220958  |
| 11               | 6                | 0              | 0.522702                | -1.818587 | 0.898205  |
| 12               | 6                | 0              | 1.181227                | -2.546419 | 1.862098  |
| 13               | 6                | 0              | 0.616508                | -2.876500 | 3.084222  |
| 14               | 6                | 0              | -0.667359               | -2.520143 | 3.395843  |
| 15               | 1                | 0              | -1.121443               | -2.794719 | 4.338373  |
| 16               | 6                | 0              | -1.362083               | -1.777102 | 2.435848  |
| 17               | 1                | 0              | -2.373777               | -1.480259 | 2.667550  |
| 18               | 6                | 0              | 2.727709                | -3.515207 | 3.105705  |
| 19               | 1                | 0              | 3.349220                | -2.751396 | 3.589982  |
| 20               | 1                | 0              | 3.220997                | -4.485796 | 3.078543  |
| 21               | 6                | 0              | 1.156433                | -1.677000 | -0.444179 |
| 22               | 6                | 0              | 1.653976                | -0.489156 | -1.041284 |
| 23               | 6                | 0              | 2.158533                | -0.520224 | -2.337575 |
| 24               | 1                | 0              | 2.522675                | 0.393218  | -2.788799 |
| 25               | 6                | 0              | 2.217774                | -1.695682 | -3.096387 |
| 26               | 1                | 0              | 2.599313                | -1.699408 | -4.108629 |
| 27               | 6                | 0              | 1.770118                | -2.839118 | -2.491438 |
| 28               | 6                | 0              | 1.270430                | -2.822766 | -1.199263 |
| 29               | 6                | 0              | -0.794828               | 1.929338  | -1.924993 |
| 30               | 6                | 0              | -2.679871               | 3.221592  | 0.082471  |
| 31               | 6                | 0              | -1.536582               | 3.907139  | -0.394887 |
| 32               | 1                | 0              | -1.522473               | 4.198967  | -1.443825 |
| 33               | 6                | 0              | -0.326225               | 4.000893  | 0.323302  |

|    |   |   |           |           |           |
|----|---|---|-----------|-----------|-----------|
| 34 | 1 | 0 | -0.335281 | 4.032974  | 1.406215  |
| 35 | 1 | 0 | 0.514224  | 4.495796  | -0.149229 |
| 36 | 6 | 0 | 1.161539  | -4.913208 | -1.958268 |
| 37 | 1 | 0 | 0.232789  | -5.369632 | -2.310176 |
| 38 | 1 | 0 | 1.896457  | -5.668969 | -1.666594 |
| 39 | 6 | 0 | -3.178412 | 3.480729  | 1.485278  |
| 40 | 1 | 0 | -3.748262 | 2.636852  | 1.870559  |
| 41 | 1 | 0 | -2.384958 | 3.700668  | 2.193830  |
| 42 | 1 | 0 | -3.860248 | 4.340660  | 1.440861  |
| 43 | 6 | 0 | -3.807473 | 2.965188  | -0.894671 |
| 44 | 1 | 0 | -4.362650 | 2.067743  | -0.609818 |
| 45 | 1 | 0 | -4.519631 | 3.800651  | -0.888107 |
| 46 | 1 | 0 | -3.448227 | 2.829425  | -1.917384 |
| 47 | 6 | 0 | 2.479632  | 0.922053  | 1.361491  |
| 48 | 6 | 0 | 3.370629  | -0.133557 | 1.542187  |
| 49 | 6 | 0 | 2.426352  | 1.941430  | 2.311644  |
| 50 | 6 | 0 | 4.189935  | -0.173860 | 2.664253  |
| 51 | 1 | 0 | 3.432994  | -0.930976 | 0.812159  |
| 52 | 6 | 0 | 3.244961  | 1.898504  | 3.430567  |
| 53 | 1 | 0 | 1.731220  | 2.760688  | 2.182704  |
| 54 | 6 | 0 | 4.127138  | 0.839885  | 3.611305  |
| 55 | 1 | 0 | 4.889012  | -0.994171 | 2.786864  |
| 56 | 1 | 0 | 3.186395  | 2.691247  | 4.167147  |
| 57 | 1 | 0 | 4.765874  | 0.807704  | 4.486985  |
| 58 | 6 | 0 | 2.652168  | 2.198045  | -1.128579 |
| 59 | 6 | 0 | 4.032837  | 1.989225  | -1.045893 |
| 60 | 6 | 0 | 2.184373  | 3.211222  | -1.961971 |
| 61 | 6 | 0 | 4.913660  | 2.767869  | -1.781079 |
| 62 | 1 | 0 | 4.426761  | 1.214805  | -0.399267 |
| 63 | 6 | 0 | 3.066347  | 3.992806  | -2.700641 |
| 64 | 1 | 0 | 1.124465  | 3.402194  | -2.040392 |
| 65 | 6 | 0 | 4.432813  | 3.773191  | -2.612824 |
| 66 | 1 | 0 | 5.980143  | 2.590743  | -1.700739 |
| 67 | 1 | 0 | 2.678221  | 4.775602  | -3.342178 |
| 68 | 1 | 0 | 5.122004  | 4.383834  | -3.185124 |
| 69 | 6 | 0 | -1.743503 | -1.548690 | -1.407350 |
| 70 | 6 | 0 | -2.126851 | -2.867387 | -1.139201 |
| 71 | 6 | 0 | -1.405748 | -1.202946 | -2.711082 |
| 72 | 6 | 0 | -2.175734 | -3.809979 | -2.153425 |
| 73 | 1 | 0 | -2.380406 | -3.159122 | -0.126376 |
| 74 | 6 | 0 | -1.439704 | -2.152789 | -3.726982 |
| 75 | 1 | 0 | -1.091644 | -0.200834 | -2.952299 |
| 76 | 6 | 0 | -1.825184 | -3.456201 | -3.452927 |
| 77 | 1 | 0 | -2.480148 | -4.825764 | -1.926238 |
| 78 | 1 | 0 | -1.155559 | -1.866942 | -4.732977 |
| 79 | 1 | 0 | -1.850771 | -4.195072 | -4.246157 |
| 80 | 6 | 0 | -3.470572 | -0.358760 | 0.502624  |
| 81 | 6 | 0 | -4.462230 | -0.754470 | -0.398244 |
| 82 | 6 | 0 | -3.859097 | 0.163911  | 1.739411  |
| 83 | 6 | 0 | -5.806569 | -0.651019 | -0.061541 |
| 84 | 1 | 0 | -4.194255 | -1.140633 | -1.373390 |
| 85 | 6 | 0 | -5.202612 | 0.246812  | 2.079000  |
| 86 | 1 | 0 | -3.104797 | 0.536413  | 2.422946  |

|    |   |   |           |           |           |
|----|---|---|-----------|-----------|-----------|
| 87 | 6 | 0 | -6.181595 | -0.159722 | 1.181135  |
| 88 | 1 | 0 | -6.560440 | -0.958569 | -0.777349 |
| 89 | 1 | 0 | -5.482097 | 0.649526  | 3.046119  |
| 90 | 1 | 0 | -7.230379 | -0.085444 | 1.445480  |

-----

**T' (NIMAG=0)**

-----

| Center<br>Number | Atomic<br>Number | Atomic<br>Type | Coordinates (Angstroms) |           |           |
|------------------|------------------|----------------|-------------------------|-----------|-----------|
|                  |                  |                | X                       | Y         | Z         |
| 1                | 44               | 0              | 0.816817                | 1.815568  | 0.014578  |
| 2                | 17               | 0              | 0.738509                | 2.138058  | -2.485854 |
| 3                | 15               | 0              | 1.664383                | -0.405183 | -0.307632 |
| 4                | 15               | 0              | -1.488450               | 1.158139  | -0.001382 |
| 5                | 8                | 0              | -2.776225               | -3.209721 | -0.667350 |
| 6                | 8                | 0              | -2.381421               | -3.972159 | -2.801677 |
| 7                | 8                | 0              | -0.826851               | -3.706609 | 1.849850  |
| 8                | 8                | 0              | -1.679442               | -3.284443 | 3.932839  |
| 9                | 8                | 0              | 0.624801                | 1.573603  | 2.977966  |
| 10               | 6                | 0              | 0.468031                | -1.540089 | -1.122310 |
| 11               | 6                | 0              | -0.731293               | -1.881933 | -0.440575 |
| 12               | 6                | 0              | -1.586930               | -2.723624 | -1.113594 |
| 13               | 6                | 0              | -1.348216               | -3.188149 | -2.397199 |
| 14               | 6                | 0              | -0.205382               | -2.856142 | -3.072684 |
| 15               | 1                | 0              | -0.011044               | -3.216964 | -4.073780 |
| 16               | 6                | 0              | 0.703359                | -2.028294 | -2.401120 |
| 17               | 1                | 0              | 1.623296                | -1.771713 | -2.907257 |
| 18               | 6                | 0              | -3.341887               | -3.935484 | -1.749823 |
| 19               | 1                | 0              | -4.240362               | -3.418839 | -2.100074 |
| 20               | 1                | 0              | -3.561933               | -4.954956 | -1.425495 |
| 21               | 6                | 0              | -1.159719               | -1.455434 | 0.924867  |
| 22               | 6                | 0              | -1.701716               | -0.181263 | 1.249119  |
| 23               | 6                | 0              | -2.262555               | 0.043212  | 2.497959  |
| 24               | 1                | 0              | -2.696079               | 1.006957  | 2.724636  |
| 25               | 6                | 0              | -2.295959               | -0.940416 | 3.495380  |
| 26               | 1                | 0              | -2.739284               | -0.752361 | 4.464007  |
| 27               | 6                | 0              | -1.742761               | -2.151282 | 3.180595  |
| 28               | 6                | 0              | -1.211389               | -2.400568 | 1.921970  |
| 29               | 6                | 0              | 0.734737                | 1.640124  | 1.832631  |
| 30               | 6                | 0              | 0.517679                | 4.000634  | 0.368033  |
| 31               | 6                | 0              | 1.782110                | 3.783609  | -0.220496 |
| 32               | 1                | 0              | 1.851860                | 3.990324  | -1.281589 |
| 33               | 6                | 0              | 2.827310                | 3.014896  | 0.329141  |
| 34               | 1                | 0              | 0.413298                | 4.164484  | 1.435852  |
| 35               | 1                | 0              | -0.233880               | 4.496272  | -0.236813 |
| 36               | 6                | 0              | -0.849472               | -4.170215 | 3.192035  |
| 37               | 1                | 0              | 0.168540                | -4.141278 | 3.601172  |
| 38               | 1                | 0              | -1.272881               | -5.173175 | 3.220438  |
| 39               | 6                | 0              | 3.996548                | 2.695331  | -0.574247 |
| 40               | 1                | 0              | 4.746447                | 3.495254  | -0.520097 |
| 41               | 1                | 0              | 4.488080                | 1.766962  | -0.270911 |

|    |   |   |           |           |           |
|----|---|---|-----------|-----------|-----------|
| 42 | 1 | 0 | 3.681348  | 2.583229  | -1.612195 |
| 43 | 6 | 0 | 3.229505  | 3.156467  | 1.782648  |
| 44 | 1 | 0 | 4.023662  | 3.910404  | 1.848619  |
| 45 | 1 | 0 | 2.414923  | 3.482417  | 2.429078  |
| 46 | 1 | 0 | 3.644228  | 2.229840  | 2.187561  |
| 47 | 6 | 0 | -2.562015 | 2.556561  | 0.537855  |
| 48 | 6 | 0 | -3.548447 | 3.070607  | -0.303435 |
| 49 | 6 | 0 | -2.307488 | 3.214970  | 1.745908  |
| 50 | 6 | 0 | -4.276663 | 4.197414  | 0.064058  |
| 51 | 1 | 0 | -3.749570 | 2.601495  | -1.257949 |
| 52 | 6 | 0 | -3.047306 | 4.326055  | 2.119544  |
| 53 | 1 | 0 | -1.516575 | 2.871414  | 2.400615  |
| 54 | 6 | 0 | -4.036902 | 4.822539  | 1.278181  |
| 55 | 1 | 0 | -5.033511 | 4.584415  | -0.608640 |
| 56 | 1 | 0 | -2.838959 | 4.813865  | 3.064980  |
| 57 | 1 | 0 | -4.608081 | 5.698154  | 1.564829  |
| 58 | 6 | 0 | -2.489652 | 0.430763  | -1.370759 |
| 59 | 6 | 0 | -2.035901 | 0.336661  | -2.682483 |
| 60 | 6 | 0 | -3.753772 | -0.073793 | -1.046164 |
| 61 | 6 | 0 | -2.834121 | -0.258110 | -3.654340 |
| 62 | 1 | 0 | -1.058053 | 0.719958  | -2.939253 |
| 63 | 6 | 0 | -4.552584 | -0.649473 | -2.021205 |
| 64 | 1 | 0 | -4.112690 | -0.022601 | -0.024104 |
| 65 | 6 | 0 | -4.090570 | -0.748350 | -3.330633 |
| 66 | 1 | 0 | -2.462807 | -0.337453 | -4.669529 |
| 67 | 1 | 0 | -5.533733 | -1.028254 | -1.756174 |
| 68 | 1 | 0 | -4.709794 | -1.207817 | -4.093449 |
| 69 | 6 | 0 | 2.129804  | -1.384609 | 1.181177  |
| 70 | 6 | 0 | 2.041266  | -2.777391 | 1.183858  |
| 71 | 6 | 0 | 2.707924  | -0.746787 | 2.276541  |
| 72 | 6 | 0 | 2.505654  | -3.509602 | 2.267806  |
| 73 | 1 | 0 | 1.607450  | -3.295160 | 0.337469  |
| 74 | 6 | 0 | 3.166271  | -1.477226 | 3.364926  |
| 75 | 1 | 0 | 2.815427  | 0.328906  | 2.276821  |
| 76 | 6 | 0 | 3.063998  | -2.862387 | 3.364022  |
| 77 | 1 | 0 | 2.433961  | -4.591600 | 2.250708  |
| 78 | 1 | 0 | 3.605732  | -0.961599 | 4.210850  |
| 79 | 1 | 0 | 3.424900  | -3.435762 | 4.210679  |
| 80 | 6 | 0 | 3.219381  | -0.566335 | -1.291990 |
| 81 | 6 | 0 | 3.295501  | -0.003321 | -2.569770 |
| 82 | 6 | 0 | 4.359166  | -1.175482 | -0.762009 |
| 83 | 6 | 0 | 4.474873  | -0.061109 | -3.298493 |
| 84 | 1 | 0 | 2.436022  | 0.509906  | -2.982190 |
| 85 | 6 | 0 | 5.542236  | -1.219425 | -1.490735 |
| 86 | 1 | 0 | 4.341182  | -1.616761 | 0.225485  |
| 87 | 6 | 0 | 5.604544  | -0.665386 | -2.761211 |
| 88 | 1 | 0 | 4.510267  | 0.383933  | -4.286418 |
| 89 | 1 | 0 | 6.416657  | -1.691939 | -1.057600 |
| 90 | 1 | 0 | 6.528278  | -0.700624 | -3.327884 |

-----  
**U'** (NIMAG=0)

| Center<br>Number | Atomic<br>Number | Atomic<br>Type | Coordinates (Angstroms) |           |           |
|------------------|------------------|----------------|-------------------------|-----------|-----------|
|                  |                  |                | X                       | Y         | Z         |
| 1                | 44               | 0              | -0.775946               | -1.839676 | -0.064045 |
| 2                | 17               | 0              | -0.590390               | -1.581725 | 2.438343  |
| 3                | 15               | 0              | 1.515971                | -1.139482 | 0.032117  |
| 4                | 15               | 0              | -1.659904               | 0.392206  | -0.259079 |
| 5                | 8                | 0              | 0.775273                | 3.739994  | 1.797167  |
| 6                | 8                | 0              | 1.665267                | 3.369594  | 3.872070  |
| 7                | 8                | 0              | 2.754351                | 3.211838  | -0.755856 |
| 8                | 8                | 0              | 2.299304                | 3.976520  | -2.878005 |
| 9                | 8                | 0              | -0.753663               | -2.286860 | -3.007079 |
| 10               | 6                | 0              | 1.742289                | 0.234128  | 1.231135  |
| 11               | 6                | 0              | 1.168502                | 1.487254  | 0.895096  |
| 12               | 6                | 0              | 1.201470                | 2.445675  | 1.879856  |
| 13               | 6                | 0              | 1.758664                | 2.228788  | 3.132026  |
| 14               | 6                | 0              | 2.360940                | 1.041546  | 3.450184  |
| 15               | 1                | 0              | 2.820629                | 0.877786  | 4.415495  |
| 16               | 6                | 0              | 2.333535                | 0.042606  | 2.470813  |
| 17               | 1                | 0              | 2.772373                | -0.915299 | 2.710889  |
| 18               | 6                | 0              | 0.772356                | 4.199913  | 3.140747  |
| 19               | 1                | 0              | -0.240025               | 4.098966  | 3.553513  |
| 20               | 1                | 0              | 1.126932                | 5.228948  | 3.171076  |
| 21               | 6                | 0              | 0.713318                | 1.891935  | -0.467102 |
| 22               | 6                | 0              | -0.502837               | 1.546210  | -1.113802 |
| 23               | 6                | 0              | -0.780657               | 2.047726  | -2.380102 |
| 24               | 1                | 0              | -1.722523               | 1.810265  | -2.853611 |
| 25               | 6                | 0              | 0.107180                | 2.877442  | -3.077785 |
| 26               | 1                | 0              | -0.123248               | 3.250476  | -4.066780 |
| 27               | 6                | 0              | 1.275091                | 3.198796  | -2.441163 |
| 28               | 6                | 0              | 1.550528                | 2.731109  | -1.166194 |
| 29               | 6                | 0              | -0.754633               | -2.065394 | -1.871905 |
| 30               | 6                | 0              | -0.439240               | -3.990823 | 0.397683  |
| 31               | 6                | 0              | -1.687335               | -3.846360 | -0.241764 |
| 32               | 1                | 0              | -1.750934               | -4.182075 | -1.275292 |
| 33               | 6                | 0              | -2.758742               | -3.051932 | 0.233960  |
| 34               | 1                | 0              | -0.366498               | -3.988885 | 1.477892  |
| 35               | 1                | 0              | 0.339442                | -4.537236 | -0.123184 |
| 36               | 6                | 0              | 3.277196                | 3.964141  | -1.840774 |
| 37               | 1                | 0              | 4.186832                | 3.481749  | -2.210033 |
| 38               | 1                | 0              | 3.469117                | 4.988395  | -1.512252 |
| 39               | 6                | 0              | -3.904497               | -2.822237 | -0.729523 |
| 40               | 1                | 0              | -4.636875               | -3.635299 | -0.643901 |
| 41               | 1                | 0              | -4.428044               | -1.890012 | -0.505246 |
| 42               | 1                | 0              | -3.570323               | -2.771126 | -1.767436 |
| 43               | 6                | 0              | -3.230731               | -3.138276 | 1.667687  |
| 44               | 1                | 0              | -3.998871               | -3.920870 | 1.723520  |
| 45               | 1                | 0              | -2.438119               | -3.373158 | 2.371782  |
| 46               | 1                | 0              | -3.699514               | -2.204879 | 1.988303  |
| 47               | 6                | 0              | 2.453045                | -0.432481 | -1.394031 |
| 48               | 6                | 0              | 3.724630                | 0.095422  | -1.146929 |
| 49               | 6                | 0              | 1.937395                | -0.359965 | -2.683570 |

|    |   |   |           |           |           |
|----|---|---|-----------|-----------|-----------|
| 50 | 6 | 0 | 4.463130  | 0.668656  | -2.169990 |
| 51 | 1 | 0 | 4.133588  | 0.066220  | -0.143205 |
| 52 | 6 | 0 | 2.670796  | 0.230160  | -3.707087 |
| 53 | 1 | 0 | 0.950215  | -0.733958 | -2.902599 |
| 54 | 6 | 0 | 3.934458  | 0.743423  | -3.455054 |
| 55 | 1 | 0 | 5.450005  | 1.066646  | -1.960590 |
| 56 | 1 | 0 | 2.243814  | 0.293510  | -4.701121 |
| 57 | 1 | 0 | 4.504686  | 1.203799  | -4.254220 |
| 58 | 6 | 0 | 2.623949  | -2.515305 | 0.556739  |
| 59 | 6 | 0 | 3.610796  | -3.014337 | -0.294805 |
| 60 | 6 | 0 | 2.391740  | -3.169342 | 1.771925  |
| 61 | 6 | 0 | 4.364397  | -4.124832 | 0.070084  |
| 62 | 1 | 0 | 3.796998  | -2.546717 | -1.253186 |
| 63 | 6 | 0 | 3.156562  | -4.266970 | 2.137884  |
| 64 | 1 | 0 | 1.590570  | -2.828803 | 2.418271  |
| 65 | 6 | 0 | 4.147161  | -4.748763 | 1.289673  |
| 66 | 1 | 0 | 5.123920  | -4.499052 | -0.607086 |
| 67 | 1 | 0 | 2.965861  | -4.755204 | 3.086911  |
| 68 | 1 | 0 | 4.738605  | -5.611579 | 1.574765  |
| 69 | 6 | 0 | -2.164430 | 1.393586  | 1.196228  |
| 70 | 6 | 0 | -2.110190 | 2.787474  | 1.147797  |
| 71 | 6 | 0 | -2.738891 | 0.774336  | 2.305028  |
| 72 | 6 | 0 | -2.613279 | 3.546360  | 2.195836  |
| 73 | 1 | 0 | -1.672273 | 3.287921  | 0.293260  |
| 74 | 6 | 0 | -3.239046 | 1.535481  | 3.353456  |
| 75 | 1 | 0 | -2.770835 | -0.303948 | 2.359619  |
| 76 | 6 | 0 | -3.176956 | 2.922273  | 3.302539  |
| 77 | 1 | 0 | -2.566147 | 4.628534  | 2.142378  |
| 78 | 1 | 0 | -3.671689 | 1.038906  | 4.214161  |
| 79 | 1 | 0 | -3.568809 | 3.515504  | 4.121594  |
| 80 | 6 | 0 | -3.205837 | 0.476779  | -1.269233 |
| 81 | 6 | 0 | -4.392086 | 0.991844  | -0.745530 |
| 82 | 6 | 0 | -3.231838 | -0.067148 | -2.557071 |
| 83 | 6 | 0 | -5.569410 | 0.955402  | -1.485387 |
| 84 | 1 | 0 | -4.410902 | 1.418584  | 0.248636  |
| 85 | 6 | 0 | -4.401660 | -0.087167 | -3.301042 |
| 86 | 1 | 0 | -2.335272 | -0.486349 | -2.992940 |
| 87 | 6 | 0 | -5.579693 | 0.418233  | -2.763928 |
| 88 | 1 | 0 | -6.480989 | 1.352903  | -1.053778 |
| 89 | 1 | 0 | -4.393234 | -0.512397 | -4.298163 |
| 90 | 1 | 0 | -6.498305 | 0.391038  | -3.338849 |

---

## References

- 1) Kim, M. H.; Schuetz, R. D. The Synthesis of Some Tertiary Amine Derivatives of Mixed Phenyl Alkyl Sulfides. *J. Am. Chem. Soc.* **1952**, *74*, 5102–5104.
- 2) Cheng, D.; Croft, L.; Abdi, M.; Lightfoot, A.; Gallagher, T., Synthetic Entries to Substituted Bicyclic Pyridones. *Org. Lett.* **2007**, *9*, 5175–5178.
- 3) Radi, S.; Salhi, S.; Radi, A. Synthesis and Preliminary Biological Activity of Some New Pyrazole Derivatives as Acyclonucleoside Analogues. *Lett. Drug Des. Discov.* **2010**, *7*, 27–30.
- 4) Xiang, M.; Pfaffinger, D. E.; Ortiz, E.; Brito, G. A.; Krische, M. J. Enantioselective Ruthenium-BINAP-Catalyzed Carbonyl Reductive Coupling of Alkoxyallenes: Convergent Construction of syn-sec,tert-Diols via (Z)- $\sigma$ -Allylmetal Intermediates. *J. Am. Chem. Soc.* **2021**, *143*, 8849–8854.
- 5) Goswami, K.; Paul, S.; Bugde, S. T.; Sinha, S. Synthesis of Optically Active Homotryptophan and its Oxygen and Sulfur analogues. *Tetrahedron* **2012**, *68*, 280–286.
- 6) Gaussian 16, Revision A.03, Frisch, M. J.; Trucks, G. W.; Schlegel, H. B.; Scuseria, G. E.; Robb, M. A.; Cheeseman, J. R.; Scalmani, G.; Barone, V.; Petersson, G. A.; Nakatsuji, H.; Li, X.; Caricato, M.; Marenich, A. V.; Bloino, J.; Janesko, B. G.; Gomperts, R.; Mennucci, B.; Hratchian, H. P.; Ortiz, J. V.; Izmaylov, A. F.; Sonnenberg, J. L.; Williams-Young, D.; Ding, F.; Lipparini, F.; Egidi, F.; Goings, J.; Peng, B.; Petrone, A.; Henderson, T.; Ranasinghe, D.; Zakrzewski, V. G.; Gao, J.; Rega, N.; Zheng, G.; Liang, W.; Hada, M.; Ehara, M.; Toyota, K.; Fukuda, R.; Hasegawa, J.; Ishida, M.; Nakajima, T.; Honda, Y.; Kitao, O.; Nakai, H.; Vreven, T.; Throssell, K.; Montgomery, J. A., Jr.; Peralta, J. E.; Ogliaro, F.; Bearpark, M. J.; Heyd, J. J.; Brothers, E. N.; Kudin, K. N.; Staroverov, V. N.; Keith, T. A.; Kobayashi, R.; Normand, J.; Raghavachari, K.; Rendell, A. P.; Burant, J. C.; Iyengar, S. S.; Tomasi, J.; Cossi, M.; Millam, J. M.; Klene, M.; Adamo, C.; Cammi, R.; Ochterski, J. W.; Martin, R. L.; Morokuma, K.; Farkas, O.; Foresman, J. B.; Fox, D. J. Gaussian, Inc., Wallingford CT, 2016.
- 7) Chai, J.-D.; Head-Gordon, M. Long-Range Corrected Hybrid Density Functionals with Damped Atom–Atom Dispersion Corrections. *Phys. Chem. Chem. Phys.* **2008**, *10*, 6615–6620.
- 8) Hehre, W. J.; Radom, L.; Schleyer, P. v. R.; Pople, J. A. *Ab Initio Molecular Orbital Theory*; Wiley: New York, 1986.
- 9) Glukhovtsev, M. N.; Pross, A.; McGrath, M. P., Radom, L. Extension of Gaussian-2 (G2) Theory to Bromine- and Iodine-Containing Molecules: Use of Effective Core Potentials. *J. Chem. Phys.* **1995**, *103*, 1878–1885.
- 10) Andrae, D.; Häußermann, U.; Dolg, M.; Stoll, H.; Preuß, H. Energy-Adjusted *Ab Initio* Pseudopotentials for the Second and Third Row Transition Elements. *Theor. Chim. Acta* **1990**, *77*, 123–141.
- 11) (a) Miertuš, S.; Scrocco, E.; Tomasi, J. Electrostatic Interaction of a Solute with a Continuum. A Direct Utilizaion of *Ab Initio* Molecular Potentials for the Prevision of Solvent Effects. *Chem. Phys.* **1981**, *55*, 117–129. (b) Scalmani, G.; Frisch, M. Continuous Surface Charge Polarizable Continuum Models of Solvation. I. General Formalism. *J. Chem. Phys.* **2010**, *132*, 114110.

- 12) Weigend, F.; Ahlrichs, R. Balanced Basis Sets of Split Valence, Triple Zeta Valence and Quadruple Zeta Valence Quality for H to Rn: Design and Assessment of Accuracy. *Phys. Chem. Chem. Phys.* **2005**, *7*, 3297–3305.
- 13) Ortiz, E.; Shezaf, J. Z.; Chang, Y.-H.; Gonçalves, T. P. Huang, K.-W.; Krische, M. J. Understanding Halide Counterion Effects in Enantioselective Ruthenium-Catalyzed Carbonyl ( $\alpha$ -Aryl)allylation: Alkynes as Latent Allenes and Trifluoroethanol-Enhanced Turnover in the Conversion of Ethanol to Higher Alcohols via Hydrogen Auto-Transfer. *J. Am. Chem. Soc.* **2021**, *143*, 16709–16717.
